# Supplementary material
Source: Elsevier journal article supplement (https://authors.library.caltech.edu/29462/5/mmc4.xls)
Supplement: mmc4 [file mmc4.xls]

## Sheet: Summary
Summary
"MCF7 specific EP" sheet for MCF7 specific enhancer-promoter interactions, relative to K562
"K562 specific EP" sheet for K562 specific enhancer-promoter interactions, relative to MCF7
The interaction anchors within +/- 5Kb to any TSS are considered as overlapping with promoters.

## Sheet: MCF7 specific EP
interaction region	span	left anchor			right anchor			pet count	p-value	left anchor near promoter?	right anchor near promoter?	gene information
		chrom	start	end	chrom	start	end
chr1:1002286-1059070	56784	chr1	1002286	1006515	chr1	1056338	1059070	4	1.27072e-11	No	Yes	uc001acu.2;C1orf159;chr1:1046736-1056736;uc001act.2;C1orf159;chr1:1046736-1056736;uc001acr.2;UNQ2998;chr1:1046736-1056736;uc001acs.2;UNQ2998;chr1:1046736-1056736;
chr1:1002720-1162054	159334	chr1	1002720	1005678	chr1	1159096	1162054	4	1.10195e-13	No	Yes	uc001adg.2;SDF4;chr1:1151731-1161731;uc001adj.1;SDF4;chr1:1154348-1164348;
chr1:1004442-1168081	163639	chr1	1004442	1006374	chr1	1165663	1168081	3	2.32036e-08	No	Yes	uc001adh.3;SDF4;chr1:1162447-1172447;uc001adi.3;SDF4;chr1:1162447-1172447;uc009vjv.2;SDF4;chr1:1162447-1172447;uc009vjw.2;SDF4;chr1:1162447-1172447;uc001adk.2;B3GALT6;chr1:1162628-1172628;
chr1:1005844-1072057	66213	chr1	1005844	1009941	chr1	1070082	1072057	4	9.92867e-13	No	Yes	uc001acv.2;BC028014;chr1:1067396-1077396;
chr1:1007333-1209797	202464	chr1	1007333	1010505	chr1	1207807	1209797	4	1.89641e-10	No	Yes	uc001adm.2;UBE2J2;chr1:1198372-1208372;uc001adn.2;UBE2J2;chr1:1204188-1214188;uc001ado.2;UBE2J2;chr1:1204234-1214234;uc001adp.2;UBE2J2;chr1:1204234-1214234;uc001adq.2;UBE2J2;chr1:1204234-1214234;uc001adr.2;UBE2J2;chr1:1204234-1214234;uc001ads.2;UBE2J2;chr1:1204234-1214234;
chr1:1008169-1042458	34289	chr1	1008169	1010856	chr1	1039844	1042458	3	1.78922e-10	No	Yes	uc001acp.2;C1orf159;chr1:1036507-1046507;
chr1:2063511-2072194	8683	chr1	2063511	2066687	chr1	2069522	2072194	3	6.17879e-13	No	Yes	uc009vlb.2;PRKCZ;chr1:2071795-2081795;uc009vla.2;PRKCZ;chr1:2070889-2080889;uc010nyx.1;PRKCZ;chr1:2071795-2081795;
chr1:3417268-3449368	32100	chr1	3417268	3421628	chr1	3446435	3449368	4	2.70159e-15	No	Yes	uc001akk.2;MEGF6;chr1:3443012-3453012;
chr1:3482051-3536538	54487	chr1	3482051	3485087	chr1	3532750	3536538	3	1.61599e-14	No	Yes	uc001akl.2;MEGF6;chr1:3523059-3533059;
chr1:3502096-3534655	32559	chr1	3502096	3505285	chr1	3530422	3534655	4	1.00987e-18	No	Yes	uc001akl.2;MEGF6;chr1:3523059-3533059;
chr1:3590526-3689659	99133	chr1	3590526	3593495	chr1	3686557	3689659	3	1.41636e-12	No	Yes	uc001akw.3;LOC388588;chr1:3684351-3694351;
chr1:6407961-6416243	8282	chr1	6407961	6412124	chr1	6412523	6416243	4	5.39203e-18	No	Yes	uc001amq.2;ACOT7;chr1:6414004-6424004;uc001amr.2;ACOT7;chr1:6415764-6425764;
chr1:9168782-9190348	21566	chr1	9168782	9175270	chr1	9186135	9190348	7	7.48324e-26	No	Yes	uc001apq.1;GPR157;chr1:9184229-9194229;uc010oad.1;GPR157;chr1:9184229-9194229;uc001apr.2;GPR157;chr1:9184229-9194229;uc001aps.2;AK022194;chr1:9184356-9194356;
chr1:9179820-9243368	63548	chr1	9179820	9182063	chr1	9241013	9243368	3	2.54757e-12	No	Yes	uc009vmq.2;EF609116;chr1:9237451-9247451;
chr1:9212362-9248983	36621	chr1	9212362	9216428	chr1	9246585	9248983	3	1.02417e-13	No	Yes	uc009vmq.2;EF609116;chr1:9237451-9247451;
chr1:9220507-9246783	26276	chr1	9220507	9228493	chr1	9239105	9246783	13	1.62915e-41	No	Yes	uc009vmq.2;EF609116;chr1:9237451-9247451;
chr1:9849986-9886615	36629	chr1	9849986	9852429	chr1	9882664	9886615	3	2.52846e-12	No	Yes	uc001aqh.2;CLSTN1;chr1:9879550-9889550;uc001aqi.2;CLSTN1;chr1:9879550-9889550;uc010oag.1;CLSTN1;chr1:9879550-9889550;
chr1:9875644-9883858	8214	chr1	9875644	9877842	chr1	9881714	9883858	3	5.72558e-14	No	Yes	uc001aqh.2;CLSTN1;chr1:9879550-9889550;uc001aqi.2;CLSTN1;chr1:9879550-9889550;uc010oag.1;CLSTN1;chr1:9879550-9889550;
chr1:9936836-9970664	33828	chr1	9936836	9938925	chr1	9967640	9970664	3	3.73395e-12	No	Yes	uc001aqk.1;CTNNBIP1;chr1:9965316-9975316;uc001aql.1;CTNNBIP1;chr1:9965316-9975316;
chr1:10712004-10855382	143378	chr1	10712004	10714801	chr1	10852157	10855382	3	1.46446e-13	No	Yes	uc001aro.2;CASZ1;chr1:10851707-10861707;uc001arp.1;CASZ1;chr1:10851707-10861707;
chr1:16159847-16312757	152910	chr1	16159847	16163248	chr1	16309651	16312757	4	4.12653e-15	No	Yes	uc001axm.1;DQ576383;chr1:16312647-16322647;
chr1:17845343-17869092	23749	chr1	17845343	17848755	chr1	17864988	17869092	5	5.29794e-18	No	Yes	uc009vpe.1;ARHGEF10L;chr1:17861329-17871329;uc001ban.2;ARHGEF10L;chr1:17861329-17871329;
chr1:17856222-17867522	11300	chr1	17856222	17860938	chr1	17863983	17867522	6	1.34626e-23	No	Yes	uc009vpe.1;ARHGEF10L;chr1:17861329-17871329;uc001ban.2;ARHGEF10L;chr1:17861329-17871329;
chr1:17875202-17911788	36586	chr1	17875202	17878412	chr1	17908303	17911788	4	1.78539e-16	No	Yes	uc010ocr.1;ARHGEF10L;chr1:17909910-17919910;uc001bao.2;ARHGEF10L;chr1:17902047-17912047;uc001bap.2;ARHGEF10L;chr1:17902047-17912047;
chr1:17885208-17908975	23767	chr1	17885208	17888299	chr1	17904313	17908975	7	4.21375e-28	No	Yes	uc001bao.2;ARHGEF10L;chr1:17902047-17912047;uc001bap.2;ARHGEF10L;chr1:17902047-17912047;
chr1:18789238-18807943	18705	chr1	18789238	18791478	chr1	18805493	18807943	4	7.27249e-19	No	Yes	uc001bax.2;KLHDC7A;chr1:18802423-18812423;uc009vpg.2;KLHDC7A;chr1:18802664-18812664;
chr1:20535414-20813065	277651	chr1	20535414	20539323	chr1	20809105	20813065	5	4.43719e-19	No	Yes	uc001bdg.2;CAMK2N1;chr1:20806138-20816138;uc001bdh.2;CAMK2N1;chr1:20807728-20817728;
chr1:20541654-20814815	273161	chr1	20541654	20544764	chr1	20811688	20814815	3	3.21403e-12	No	Yes	uc001bdg.2;CAMK2N1;chr1:20806138-20816138;uc001bdh.2;CAMK2N1;chr1:20807728-20817728;
chr1:20602868-20612844	9976	chr1	20602868	20605949	chr1	20608700	20612844	3	4.84185e-15	No	Yes	uc001bdd.2;VWA5B1;chr1:20612411-20622411;uc009vps.2;VWA5B1;chr1:20612411-20622411;uc010odc.1;VWA5B1;chr1:20612411-20622411;
chr1:21578570-21673867	95297	chr1	21578570	21581771	chr1	21672019	21673867	3	2.05794e-13	No	Yes	uc001bem.2;ECE1;chr1:21667034-21677034;
chr1:26945644-27185156	239512	chr1	26945644	26948586	chr1	27182946	27185156	3	2.37898e-10	No	Yes	uc001bnc.1;SFN;chr1:27184632-27194632;
chr1:27136873-27155456	18583	chr1	27136873	27139525	chr1	27153086	27155456	3	1.84449e-13	No	Yes	uc010ofh.1;ZDHHC18;chr1:27153508-27163508;uc001bnb.2;ZDHHC18;chr1:27148200-27158200;
chr1:31700823-31769717	68894	chr1	31700823	31703829	chr1	31766991	31769717	3	2.807e-13	No	Yes	uc001bso.2;SNRNP40;chr1:31764644-31774644;uc010oge.1;SNRNP40;chr1:31764644-31774644;uc001bsp.1;ZCCHC17;chr1:31764841-31774841;uc001bsq.1;ZCCHC17;chr1:31764841-31774841;uc010ogf.1;ZCCHC17;chr1:31764841-31774841;uc009vtu.1;ZCCHC17;chr1:31764841-31774841;uc001bsr.1;ZCCHC17;chr1:31764930-31774930;uc009vtv.1;ZCCHC17;chr1:31764930-31774930;
chr1:32306523-32405852	99329	chr1	32306523	32309770	chr1	32402835	32405852	3	2.82034e-12	No	Yes	uc001bty.1;PTP4A2;chr1:32398988-32408988;uc001btz.1;PTP4A2;chr1:32398988-32408988;
chr1:32965189-33007627	42438	chr1	32965189	32967915	chr1	33003152	33007627	6	1.60822e-21	No	Yes	uc001bvm.2;ZBTB8A;chr1:32999771-33009771;uc001bvn.2;ZBTB8A;chr1:32999771-33009771;
chr1:33591633-33816312	224679	chr1	33591633	33594855	chr1	33813166	33816312	3	1.46692e-09	No	Yes	uc001bxe.1;PHC2;chr1:33810499-33820499;uc001bxf.1;PHC2;chr1:33810499-33820499;
chr1:33592559-33648329	55770	chr1	33592559	33595482	chr1	33645822	33648329	3	6.95743e-11	No	Yes	uc001bxb.2;TRIM62;chr1:33642671-33652671;
chr1:33592653-33606652	13999	chr1	33592653	33594770	chr1	33604544	33606652	3	3.47279e-13	No	Yes	uc001bxa.1;AX747064;chr1:33603831-33613831;
chr1:33615885-33648778	32893	chr1	33615885	33618793	chr1	33645850	33648778	3	4.95622e-12	No	Yes	uc001bxb.2;TRIM62;chr1:33642671-33652671;
chr1:33626473-33723276	96803	chr1	33626473	33629733	chr1	33721146	33723276	3	1.34708e-10	No	Yes	uc001bxc.1;ZNF362;chr1:33717173-33727173;
chr1:33633488-33649818	16330	chr1	33633488	33638076	chr1	33644912	33649818	7	1.56588e-28	No	Yes	uc001bxb.2;TRIM62;chr1:33642671-33652671;
chr1:33683687-33726249	42562	chr1	33683687	33689850	chr1	33719516	33726249	32	0	No	Yes	uc001bxc.1;ZNF362;chr1:33717173-33727173;
chr1:33691412-33721064	29652	chr1	33691412	33694655	chr1	33719030	33721064	3	1.10428e-12	No	Yes	uc001bxc.1;ZNF362;chr1:33717173-33727173;
chr1:33702921-33723166	20245	chr1	33702921	33707698	chr1	33720587	33723166	5	5.00071e-18	No	Yes	uc001bxc.1;ZNF362;chr1:33717173-33727173;
chr1:35564652-35659630	94978	chr1	35564652	35566696	chr1	35657557	35659630	3	2.86697e-13	No	Yes	uc001byr.2;SFPQ;chr1:35651194-35661194;uc001bys.2;SFPQ;chr1:35653743-35663743;
chr1:35609042-35659988	50946	chr1	35609042	35611990	chr1	35657412	35659988	3	2.15401e-12	No	Yes	uc001byr.2;SFPQ;chr1:35651194-35661194;uc001bys.2;SFPQ;chr1:35653743-35663743;
chr1:35911340-36024267	112927	chr1	35911340	35914863	chr1	36020176	36024267	4	5.7539e-16	No	Yes	uc010ohx.1;KIAA1837;chr1:36018003-36028003;uc001byx.2;KIAA0319L;chr1:36018037-36028037;uc001byz.2;KIAA0319L;chr1:36018037-36028037;uc010ohw.1;KIAA1837;chr1:36018551-36028551;uc001bza.2;NCDN;chr1:36018392-36028392;uc001bzb.2;NCDN;chr1:36018392-36028392;uc001bzc.2;NCDN;chr1:36018392-36028392;
chr1:41087532-41159518	71986	chr1	41087532	41090996	chr1	41157225	41159518	3	4.61246e-12	No	Yes	uc010ojl.1;LOC100130557;chr1:41152933-41162933;uc010ojm.1;NFYC;chr1:41152241-41162241;uc001cfx.3;NFYC;chr1:41152241-41162241;uc009vwd.2;NFYC;chr1:41152241-41162241;uc001cfz.2;NFYC;chr1:41152241-41162241;uc010ojn.1;NFYC;chr1:41152241-41162241;uc001cfy.3;NFYC;chr1:41152241-41162241;uc001cgc.2;NFYC;chr1:41152679-41162679;
chr1:42324262-42614540	290278	chr1	42324262	42327903	chr1	42612132	42614540	4	8.89909e-17	No	Yes	uc001chc.1;GUCA2B;chr1:42614091-42624091;
chr1:42326728-42381548	54820	chr1	42326728	42329389	chr1	42379199	42381548	3	1.81527e-11	No	Yes	uc001cgz.3;HIVEP3;chr1:42379496-42389496;uc001cha.3;HIVEP3;chr1:42379496-42389496;
chr1:42327181-42386020	58839	chr1	42327181	42332094	chr1	42382223	42386020	6	4.48535e-20	No	Yes	uc001cgz.3;HIVEP3;chr1:42379496-42389496;uc001cha.3;HIVEP3;chr1:42379496-42389496;
chr1:42664339-42801669	137330	chr1	42664339	42666137	chr1	42799305	42801669	3	1.49828e-12	No	Yes	uc001che.2;FOXJ3;chr1:42795636-42805636;uc001chf.2;FOXJ3;chr1:42795903-42805903;uc001chh.1;FOXJ3;chr1:42795903-42805903;uc001chg.2;FOXJ3;chr1:42796548-42806548;
chr1:43700412-43835971	135559	chr1	43700412	43705332	chr1	43831337	43835971	6	1.36266e-21	No	Yes	uc001ciz.2;ELOVL1;chr1:43828087-43838087;uc001cja.2;ELOVL1;chr1:43828361-43838361;uc001cjb.2;ELOVL1;chr1:43828699-43838699;uc001cjc.2;ELOVL1;chr1:43828699-43838699;uc010okh.1;ELOVL1;chr1:43828699-43838699;
chr1:43985651-44117654	132003	chr1	43985651	43988886	chr1	44114864	44117654	3	4.69638e-11	No	Yes	uc001cjx.2;KDM4A;chr1:44110796-44120796;uc010oki.1;KIAA0677;chr1:44110796-44120796;
chr1:43988298-43996455	8157	chr1	43988298	43990996	chr1	43993549	43996455	3	1.66279e-12	No	Yes	uc001cjq.3;PTPRF;chr1:43991546-44001546;uc001cjr.2;PTPRF;chr1:43991546-44001546;uc001cjs.2;PTPRF;chr1:43991546-44001546;
chr1:44791964-44822068	30104	chr1	44791964	44796881	chr1	44819070	44822068	5	5.68643e-19	No	Yes	uc010okv.1;PRNPIP;chr1:44813597-44823597;uc001clt.2;ERI3;chr1:44815939-44825939;uc009vxg.2;ERI3;chr1:44815939-44825939;uc010okw.1;PRNPIP;chr1:44815939-44825939;uc001clu.2;PRNPIP;chr1:44815939-44825939;
chr1:46506900-46598832	91932	chr1	46506900	46509372	chr1	46596626	46598832	4	9.13655e-15	No	Yes	uc001cpb.3;PIK3R3;chr1:46593380-46603380;uc009vyb.2;PIK3R3;chr1:46593380-46603380;uc009vyc.2;PIK3R3;chr1:46593467-46603467;uc001cpc.3;PIK3R3;chr1:46593708-46603708;
chr1:54375953-54413121	37168	chr1	54375953	54379171	chr1	54410420	54413121	3	3.66535e-13	No	Yes	uc001cwi.1;HSPB11;chr1:54406288-54416288;uc001cwh.2;HSPB11;chr1:54406288-54416288;uc001cwj.1;LRRC42;chr1:54407036-54417036;uc001cwl.1;LRRC42;chr1:54407036-54417036;uc001cwk.1;LRRC42;chr1:54407036-54417036;uc009vzm.1;LRRC42;chr1:54407036-54417036;
chr1:55414482-55463739	49257	chr1	55414482	55419000	chr1	55460724	55463739	5	9.36168e-25	No	Yes	uc001cye.2;BSND;chr1:55459616-55469616;
chr1:57023598-57046465	22867	chr1	57023598	57027518	chr1	57041775	57046465	4	2.89043e-16	No	Yes	uc001cyj.1;PPAP2B;chr1:57040257-57050257;
chr1:62173080-62209587	36507	chr1	62173080	62176930	chr1	62205875	62209587	4	2.9404e-15	No	Yes	uc009waf.1;INADL;chr1:62203148-62213148;uc001daa.2;INADL;chr1:62203148-62213148;uc001dab.2;INADL;chr1:62203148-62213148;
chr1:67838200-67897609	59409	chr1	67838200	67841372	chr1	67894510	67897609	3	8.07657e-13	No	Yes	uc001ddx.2;SERBP1;chr1:67891123-67901123;uc001ddy.2;SERBP1;chr1:67891123-67901123;uc001ddv.2;SERBP1;chr1:67891123-67901123;uc001ddw.2;SERBP1;chr1:67891123-67901123;
chr1:70786838-70822142	35304	chr1	70786838	70788846	chr1	70818931	70822142	3	4.39066e-13	No	Yes	uc001dey.3;ANKRD13C;chr1:70815399-70825399;uc001dex.3;ANKRD13C;chr1:70815417-70825417;uc009wbk.2;ANKRD13C;chr1:70815417-70825417;uc010oqp.1;HHLA3;chr1:70815492-70825492;uc001dfa.2;HHLA3;chr1:70815492-70825492;uc001dfb.2;HHLA3;chr1:70815492-70825492;uc001dfc.2;HHLA3;chr1:70815492-70825492;
chr1:75185247-75199563	14316	chr1	75185247	75187667	chr1	75196459	75199563	3	3.53288e-14	No	Yes	uc001dgk.2;CRYZ;chr1:75194092-75204092;uc001dgj.2;CRYZ;chr1:75194092-75204092;uc001dgl.2;CRYZ;chr1:75194092-75204092;uc001dgm.2;CRYZ;chr1:75194092-75204092;uc001dgn.2;TYW3;chr1:75193835-75203835;uc010oqw.1;TYW3;chr1:75193835-75203835;uc010oqx.1;TYW3;chr1:75193835-75203835;uc010oqy.1;TYW3;chr1:75193861-75203861;
chr1:85570894-85668446	97552	chr1	85570894	85574468	chr1	85666663	85668446	3	8.98959e-12	No	Yes	uc009wcm.2;SYDE2;chr1:85661728-85671728;uc001dku.3;SYDE2;chr1:85661728-85671728;
chr1:85574971-85668377	93406	chr1	85574971	85578124	chr1	85666551	85668377	3	9.08466e-12	No	Yes	uc009wcm.2;SYDE2;chr1:85661728-85671728;uc001dku.3;SYDE2;chr1:85661728-85671728;
chr1:85600190-85667718	67528	chr1	85600190	85603293	chr1	85664973	85667718	4	3.31435e-15	No	Yes	uc009wcm.2;SYDE2;chr1:85661728-85671728;uc001dku.3;SYDE2;chr1:85661728-85671728;
chr1:85917225-85929082	11857	chr1	85917225	85920485	chr1	85926526	85929082	3	1.44018e-14	No	Yes	uc009wco.2;DDAH1;chr1:85925267-85935267;uc001dlb.2;DDAH1;chr1:85925889-85935889;
chr1:85921195-85932092	10897	chr1	85921195	85924566	chr1	85929657	85932092	3	1.01613e-12	No	Yes	uc009wco.2;DDAH1;chr1:85925267-85935267;uc001dlb.2;DDAH1;chr1:85925889-85935889;
chr1:86011310-86041658	30348	chr1	86011310	86014222	chr1	86037921	86041658	3	6.95682e-14	No	Yes	uc001dlc.2;DDAH1;chr1:86039046-86049046;uc001dle.2;CYR61;chr1:86041443-86051443;
chr1:87243761-87381133	137372	chr1	87243761	87246735	chr1	87378491	87381133	3	2.1451e-12	No	Yes	uc010osi.1;SEP15;chr1:87375107-87385107;uc010osj.1;SEP15;chr1:87375107-87385107;uc001dmc.3;HS2ST1;chr1:87375334-87385334;uc010osk.1;HS2ST1;chr1:87375334-87385334;
chr1:91904615-91967023	62408	chr1	91904615	91908248	chr1	91964450	91967023	3	3.639e-14	No	Yes	uc001doe.2;CDC7;chr1:91961403-91971403;uc001dof.2;CDC7;chr1:91961403-91971403;uc010osw.1;CDC7;chr1:91961403-91971403;uc009wdc.2;CDC7;chr1:91961664-91971664;
chr1:94092851-94147993	55142	chr1	94092851	94096597	chr1	94146302	94147993	4	5.52606e-16	No	Yes	uc001dpz.2;BCAR3;chr1:94141926-94151926;uc001dqa.2;BCAR3;chr1:94142385-94152385;
chr1:94106443-94148365	41922	chr1	94106443	94109001	chr1	94145542	94148365	4	2.25986e-16	No	Yes	uc001dpz.2;BCAR3;chr1:94141926-94151926;uc001dqa.2;BCAR3;chr1:94142385-94152385;
chr1:94567418-94584135	16717	chr1	94567418	94570803	chr1	94581520	94584135	4	2.04943e-17	No	Yes	uc001dqh.2;ABCA4;chr1:94581705-94591705;uc010otn.1;ABCA4;chr1:94581705-94591705;
chr1:100272670-100600109	327439	chr1	100272670	100276098	chr1	100596901	100600109	4	5.43179e-18	No	Yes	uc001dsu.2;SASS6;chr1:100593511-100603511;uc009wdz.2;DKFZp761A078;chr1:100593511-100603511;uc001dsv.2;CCDC76;chr1:100593705-100603705;uc010ouf.1;CCDC76;chr1:100593705-100603705;uc009wea.2;CCDC76;chr1:100593705-100603705;
chr1:107568765-107601263	32498	chr1	107568765	107571710	chr1	107598663	107601263	4	3.46052e-11	No	Yes	uc010ous.1;PRMT6;chr1:107594266-107604266;
chr1:107574208-107600730	26522	chr1	107574208	107577747	chr1	107597914	107600730	4	7.42365e-11	No	Yes	uc010ous.1;PRMT6;chr1:107594266-107604266;
chr1:108125887-114355168	6229281	chr1	108125887	108130647	chr1	114349315	114355168	14	5.33755e-42	No	Yes	uc001edq.2;RSBN1;chr1:114350070-114360070;uc001edr.2;RSBN1;chr1:114350070-114360070;
chr1:108132937-114356900	6223963	chr1	108132937	108135813	chr1	114353459	114356900	4	9.59104e-11	No	Yes	uc001edq.2;RSBN1;chr1:114350070-114360070;uc001edr.2;RSBN1;chr1:114350070-114360070;
chr1:108135867-114355628	6219761	chr1	108135867	108138252	chr1	114351966	114355628	3	1.54351e-07	No	Yes	uc001edq.2;RSBN1;chr1:114350070-114360070;uc001edr.2;RSBN1;chr1:114350070-114360070;
chr1:108137228-108231719	94491	chr1	108137228	108139453	chr1	108229039	108231719	3	2.15114e-10	No	Yes	uc001dvj.1;VAV3;chr1:108226126-108236126;uc010ouv.1;VAV3;chr1:108226126-108236126;
chr1:108140626-114356050	6215424	chr1	108140626	108144102	chr1	114353292	114356050	3	3.58184e-08	No	Yes	uc001edq.2;RSBN1;chr1:114350070-114360070;uc001edr.2;RSBN1;chr1:114350070-114360070;
chr1:108145073-114356519	6211446	chr1	108145073	108148427	chr1	114353759	114356519	3	2.95121e-08	No	Yes	uc001edq.2;RSBN1;chr1:114350070-114360070;uc001edr.2;RSBN1;chr1:114350070-114360070;
chr1:108149170-108232779	83609	chr1	108149170	108152031	chr1	108229601	108232779	3	1.80248e-10	No	Yes	uc001dvj.1;VAV3;chr1:108226126-108236126;uc010ouv.1;VAV3;chr1:108226126-108236126;
chr1:108165665-108220233	54568	chr1	108165665	108169441	chr1	108217167	108220233	4	5.71901e-15	No	Yes	uc010ouu.1;VAV3;chr1:108215631-108225631;
chr1:108183163-108232126	48963	chr1	108183163	108185869	chr1	108229676	108232126	3	2.50165e-10	No	Yes	uc001dvj.1;VAV3;chr1:108226126-108236126;uc010ouv.1;VAV3;chr1:108226126-108236126;
chr1:108206670-108216516	9846	chr1	108206670	108209087	chr1	108213661	108216516	3	3.31927e-12	No	Yes	uc010ouu.1;VAV3;chr1:108215631-108225631;
chr1:108289707-114473423	6183716	chr1	108289707	108293879	chr1	114470865	114473423	4	6.54529e-11	No	Yes	uc001eej.2;BC048113;chr1:114466854-114476854;uc001eek.2;BC036361;chr1:114466880-114476880;uc001eel.2;HIPK1;chr1:114466995-114476995;uc001eem.2;HIPK1;chr1:114466995-114476995;uc001een.2;HIPK1;chr1:114467438-114477438;
chr1:108329189-108509215	180026	chr1	108329189	108334018	chr1	108505805	108509215	5	1.7495e-16	No	Yes	uc001dvl.1;VAV-3;chr1:108501218-108511218;uc001dvk.1;VAV3;chr1:108502545-108512545;uc010ouw.1;VAV3;chr1:108502545-108512545;uc010oux.1;VAV3;chr1:108502545-108512545;
chr1:108478168-108509527	31359	chr1	108478168	108482345	chr1	108505944	108509527	8	3.42137e-26	No	Yes	uc001dvl.1;VAV-3;chr1:108501218-108511218;uc001dvk.1;VAV3;chr1:108502545-108512545;uc010ouw.1;VAV3;chr1:108502545-108512545;uc010oux.1;VAV3;chr1:108502545-108512545;
chr1:108484549-108509245	24696	chr1	108484549	108486943	chr1	108505720	108509245	3	8.63855e-11	No	Yes	uc001dvl.1;VAV-3;chr1:108501218-108511218;uc001dvk.1;VAV3;chr1:108502545-108512545;uc010ouw.1;VAV3;chr1:108502545-108512545;uc010oux.1;VAV3;chr1:108502545-108512545;
chr1:108496338-108510205	13867	chr1	108496338	108500398	chr1	108506955	108510205	3	6.92718e-10	No	Yes	uc001dvl.1;VAV-3;chr1:108501218-108511218;uc001dvk.1;VAV3;chr1:108502545-108512545;uc010ouw.1;VAV3;chr1:108502545-108512545;uc010oux.1;VAV3;chr1:108502545-108512545;
chr1:108691411-108743146	51735	chr1	108691411	108693988	chr1	108740278	108743146	3	7.73059e-09	No	Yes	uc001dvm.2;SLC25A24;chr1:108730363-108740363;uc001dvn.3;SLC25A24;chr1:108737974-108747974;
chr1:108694847-108743547	48700	chr1	108694847	108697457	chr1	108741383	108743547	3	1.13145e-08	No	Yes	uc001dvn.3;SLC25A24;chr1:108737974-108747974;
chr1:108697790-108744826	47036	chr1	108697790	108701432	chr1	108739565	108744826	4	2.53494e-10	No	Yes	uc001dvm.2;SLC25A24;chr1:108730363-108740363;uc001dvn.3;SLC25A24;chr1:108737974-108747974;
chr1:108709879-108746677	36798	chr1	108709879	108714588	chr1	108741307	108746677	8	5.94162e-21	No	Yes	uc001dvn.3;SLC25A24;chr1:108737974-108747974;
chr1:108710588-108741114	30526	chr1	108710588	108713276	chr1	108737588	108741114	4	3.40996e-13	No	Yes	uc001dvm.2;SLC25A24;chr1:108730363-108740363;uc001dvn.3;SLC25A24;chr1:108737974-108747974;
chr1:108854315-109104377	250062	chr1	108854315	108857506	chr1	109102558	109104377	3	9.61117e-10	No	Yes	uc010ouy.1;FAM102B;chr1:109097970-109107970;
chr1:109186157-109236939	50782	chr1	109186157	109189752	chr1	109233002	109236939	5	7.09325e-15	No	Yes	uc001dvv.3;PRPF38B;chr1:109229931-109239931;uc001dvw.3;PRPF38B;chr1:109229931-109239931;uc010ouz.1;PRPF38B;chr1:109229931-109239931;
chr1:109194817-109237489	42672	chr1	109194817	109198655	chr1	109232438	109237489	4	3.80455e-12	No	Yes	uc001dvv.3;PRPF38B;chr1:109229931-109239931;uc001dvw.3;PRPF38B;chr1:109229931-109239931;uc010ouz.1;PRPF38B;chr1:109229931-109239931;
chr1:109211351-109234819	23468	chr1	109211351	109214340	chr1	109232457	109234819	3	6.20066e-11	No	Yes	uc001dvv.3;PRPF38B;chr1:109229931-109239931;uc001dvw.3;PRPF38B;chr1:109229931-109239931;uc010ouz.1;PRPF38B;chr1:109229931-109239931;
chr1:109335372-109421057	85685	chr1	109335372	109339517	chr1	109418215	109421057	3	1.21624e-11	No	Yes	uc010ovc.1;GPSM2;chr1:109414602-109424602;uc010ovd.1;GPSM2;chr1:109414602-109424602;uc010ove.1;GPSM2;chr1:109414602-109424602;
chr1:109370541-109423724	53183	chr1	109370541	109373667	chr1	109420153	109423724	3	6.03605e-11	No	Yes	uc010ovc.1;GPSM2;chr1:109414602-109424602;uc010ovd.1;GPSM2;chr1:109414602-109424602;uc010ove.1;GPSM2;chr1:109414602-109424602;
chr1:109372234-109415537	43303	chr1	109372234	109374894	chr1	109410802	109415537	5	2.30724e-19	No	Yes	uc010ovc.1;GPSM2;chr1:109414602-109424602;uc010ovd.1;GPSM2;chr1:109414602-109424602;uc010ove.1;GPSM2;chr1:109414602-109424602;
chr1:109690710-109793592	102882	chr1	109690710	109696301	chr1	109789349	109793592	7	1.32742e-16	No	Yes	uc001dxa.3;CELSR2;chr1:109787640-109797640;
chr1:109692976-109727204	34228	chr1	109692976	109695706	chr1	109723704	109727204	3	4.89238e-10	No	Yes	uc001dwr.2;KIAA1324;chr1:109725600-109735600;
chr1:109693298-109731224	37926	chr1	109693298	109695717	chr1	109727263	109731224	6	8.66623e-20	No	Yes	uc001dwr.2;KIAA1324;chr1:109725600-109735600;
chr1:109702602-109725610	23008	chr1	109702602	109706789	chr1	109722731	109725610	3	5.56201e-11	No	Yes	uc001dwr.2;KIAA1324;chr1:109725600-109735600;
chr1:109781059-109971873	190814	chr1	109781059	109784204	chr1	109967277	109971873	4	2.6715e-09	No	Yes	uc001dxn.2;PSMA5;chr1:109964037-109974037;uc010ovj.1;PSMA5;chr1:109964037-109974037;
chr1:109907737-109942370	34633	chr1	109907737	109911505	chr1	109939959	109942370	3	4.14911e-11	No	Yes	uc010ovi.1;SORT1;chr1:109930979-109940979;uc009wfb.2;SORT1;chr1:109930979-109940979;uc001dxm.1;SORT1;chr1:109935563-109945563;
chr1:110744206-110956645	212439	chr1	110744206	110747989	chr1	110952659	110956645	3	3.8005e-12	No	Yes	uc001dzr.2;HBXIP;chr1:110945546-110955546;
chr1:110761492-110881764	120272	chr1	110761492	110763413	chr1	110879545	110881764	3	1.52814e-11	No	Yes	uc001dzj.2;BC053344;chr1:110876793-110886793;uc001dzl.1;RBM15;chr1:110876944-110886944;uc001dzm.1;RBM15;chr1:110876944-110886944;
chr1:111707196-111748307	41111	chr1	111707196	111710090	chr1	111745933	111748307	3	1.16417e-10	No	Yes	uc001eak.1;DENND2D;chr1:111738281-111748281;uc001eal.1;DENND2D;chr1:111742031-111752031;
chr1:112449207-112535602	86395	chr1	112449207	112451354	chr1	112531752	112535602	3	3.8709e-09	No	Yes	uc001ebu.1;KCND3;chr1:112526777-112536777;uc001ebv.1;KCND3;chr1:112526777-112536777;uc001ebw.2;BC034233;chr1:112528157-112538157;
chr1:112518251-112529469	11218	chr1	112518251	112522353	chr1	112522068	112529469	9	1.68795e-27	No	Yes	uc001ebu.1;KCND3;chr1:112526777-112536777;uc001ebv.1;KCND3;chr1:112526777-112536777;uc001ebw.2;BC034233;chr1:112528157-112538157;
chr1:112518481-112534403	15922	chr1	112518481	112521711	chr1	112531366	112534403	6	7.27747e-17	No	Yes	uc001ebu.1;KCND3;chr1:112526777-112536777;uc001ebv.1;KCND3;chr1:112526777-112536777;uc001ebw.2;BC034233;chr1:112528157-112538157;
chr1:113043050-113162652	119602	chr1	113043050	113044804	chr1	113159767	113162652	3	1.4098e-10	No	Yes	uc010owi.1;ST7L;chr1:113155839-113165839;uc001ecc.2;ST7L;chr1:113156550-113166550;uc010owg.1;ST7L;chr1:113156761-113166761;uc010owh.1;ST7L;chr1:113156761-113166761;uc001ech.2;ST7L;chr1:113156761-113166761;uc009wgi.1;ST7L;chr1:113156761-113166761;uc010owj.1;ST7L;chr1:113156761-113166761;uc001ecd.2;ST7L;chr1:113157040-113167040;uc001ece.2;ST7L;chr1:113157040-113167040;uc001ecf.2;ST7L;chr1:113157040…
chr1:113681546-113934703	253157	chr1	113681546	113685341	chr1	113929914	113934703	7	1.63449e-22	No	Yes	uc001edh.3;MAGI3;chr1:113928474-113938474;uc001edk.2;MAGI3;chr1:113928474-113938474;uc001edi.3;MAGI3;chr1:113928474-113938474;uc010owm.1;MAGI3;chr1:113928474-113938474;
chr1:113687424-113933577	246153	chr1	113687424	113692442	chr1	113930468	113933577	6	2.12913e-19	No	Yes	uc001edh.3;MAGI3;chr1:113928474-113938474;uc001edk.2;MAGI3;chr1:113928474-113938474;uc001edi.3;MAGI3;chr1:113928474-113938474;uc010owm.1;MAGI3;chr1:113928474-113938474;
chr1:113736589-113934442	197853	chr1	113736589	113741335	chr1	113931781	113934442	4	2.68408e-13	No	Yes	uc001edh.3;MAGI3;chr1:113928474-113938474;uc001edk.2;MAGI3;chr1:113928474-113938474;uc001edi.3;MAGI3;chr1:113928474-113938474;uc010owm.1;MAGI3;chr1:113928474-113938474;
chr1:114311052-114449535	138483	chr1	114311052	114314058	chr1	114447909	114449535	3	1.54056e-09	No	Yes	uc001eea.1;AP4B1;chr1:114438022-114448022;uc001eeb.2;AP4B1;chr1:114442482-114452482;uc001eec.2;AP4B1;chr1:114442482-114452482;uc010owq.1;AP4B1;chr1:114442482-114452482;uc001eed.2;AP4B1;chr1:114442741-114452741;uc010owp.1;AP4B1;chr1:114442741-114452741;uc001eeg.2;DCLRE1B;chr1:114443037-114453037;uc001eeh.2;DCLRE1B;chr1:114443037-114453037;uc001eei.2;DCLRE1B;chr1:114443037-114453037;
chr1:114378744-114415533	36789	chr1	114378744	114382366	chr1	114412753	114415533	4	4.56268e-14	No	Yes	uc001eds.2;PTPN22;chr1:114409375-114419375;uc009wgq.2;PTPN22;chr1:114409375-114419375;uc010owo.1;PTPN22;chr1:114409375-114419375;uc001edt.2;PTPN22;chr1:114409375-114419375;uc009wgr.2;PTPN22;chr1:114409375-114419375;uc009wgs.2;PTPN22;chr1:114409375-114419375;uc001edu.2;PTPN22;chr1:114409375-114419375;
chr1:114406869-114473817	66948	chr1	114406869	114409204	chr1	114471342	114473817	3	6.15295e-09	No	Yes	uc001eej.2;BC048113;chr1:114466854-114476854;uc001eek.2;BC036361;chr1:114466880-114476880;uc001eel.2;HIPK1;chr1:114466995-114476995;uc001eem.2;HIPK1;chr1:114466995-114476995;uc001een.2;HIPK1;chr1:114467438-114477438;
chr1:114887452-115214149	326697	chr1	114887452	114890928	chr1	115211407	115214149	4	4.4997e-11	No	Yes	uc001efc.1;DENND2C;chr1:115207732-115217732;uc001efd.1;DENND2C;chr1:115207732-115217732;uc001eez.2;DENND2C;chr1:115208044-115218044;
chr1:114887667-115300707	413040	chr1	114887667	114890611	chr1	115299155	115300707	3	1.84227e-07	No	Yes	uc001efk.2;CSDE1;chr1:115295671-115305671;uc001efm.2;CSDE1;chr1:115295671-115305671;uc001efl.2;CSDE1;chr1:115295671-115305671;uc009wgv.2;CSDE1;chr1:115295671-115305671;uc001efn.2;CSDE1;chr1:115295671-115305671;
chr1:114904603-115054443	149840	chr1	114904603	114906853	chr1	115052018	115054443	3	2.5194e-09	No	Yes	uc001eew.2;TRIM33;chr1:115048781-115058781;uc001eex.2;TRIM33;chr1:115048781-115058781;
chr1:114962393-115055492	93099	chr1	114962393	114965407	chr1	115051748	115055492	6	1.43746e-14	No	Yes	uc001eew.2;TRIM33;chr1:115048781-115058781;uc001eex.2;TRIM33;chr1:115048781-115058781;
chr1:114993757-115059107	65350	chr1	114993757	114998258	chr1	115056950	115059107	4	2.15115e-12	No	Yes	uc001eew.2;TRIM33;chr1:115048781-115058781;uc001eex.2;TRIM33;chr1:115048781-115058781;
chr1:114993842-115056648	62806	chr1	114993842	115000124	chr1	115050832	115056648	12	9.84308e-27	No	Yes	uc001eew.2;TRIM33;chr1:115048781-115058781;uc001eex.2;TRIM33;chr1:115048781-115058781;
chr1:115111377-115214689	103312	chr1	115111377	115114437	chr1	115210988	115214689	4	2.42917e-11	No	Yes	uc001efc.1;DENND2C;chr1:115207732-115217732;uc001efd.1;DENND2C;chr1:115207732-115217732;uc001eez.2;DENND2C;chr1:115208044-115218044;
chr1:115151840-115219733	67893	chr1	115151840	115155773	chr1	115217209	115219733	3	4.37452e-10	No	Yes	uc001efc.1;DENND2C;chr1:115207732-115217732;uc001efd.1;DENND2C;chr1:115207732-115217732;uc001eez.2;DENND2C;chr1:115208044-115218044;
chr1:115164554-115214256	49702	chr1	115164554	115167282	chr1	115211756	115214256	4	2.03522e-12	No	Yes	uc001efc.1;DENND2C;chr1:115207732-115217732;uc001efd.1;DENND2C;chr1:115207732-115217732;uc001eez.2;DENND2C;chr1:115208044-115218044;
chr1:115621065-115630481	9416	chr1	115621065	115624793	chr1	115626787	115630481	4	1.12312e-15	No	Yes	uc001eft.2;TSPAN2;chr1:115627115-115637115;
chr1:116148248-116308871	160623	chr1	116148248	116152392	chr1	116305841	116308871	5	1.06989e-18	No	Yes	uc001efx.3;CASQ2;chr1:116306426-116316426;uc010owu.1;CASQ2;chr1:116306426-116316426;
chr1:116151018-116315682	164664	chr1	116151018	116153338	chr1	116313848	116315682	3	8.29026e-12	No	Yes	uc001efx.3;CASQ2;chr1:116306426-116316426;uc010owu.1;CASQ2;chr1:116306426-116316426;
chr1:116153128-116186908	33780	chr1	116153128	116156638	chr1	116184791	116186908	3	1.01104e-09	No	Yes	uc001efv.1;VANGL1;chr1:116179573-116189573;uc009wgy.1;VANGL1;chr1:116179573-116189573;
chr1:116171732-116186105	14373	chr1	116171732	116175298	chr1	116183280	116186105	6	4.14246e-19	No	Yes	uc001efv.1;VANGL1;chr1:116179573-116189573;uc009wgy.1;VANGL1;chr1:116179573-116189573;
chr1:116250340-116311343	61003	chr1	116250340	116262220	chr1	116300789	116311343	35	0	No	Yes	uc001efx.3;CASQ2;chr1:116306426-116316426;uc010owu.1;CASQ2;chr1:116306426-116316426;
chr1:116254742-116316093	61351	chr1	116254742	116259244	chr1	116311730	116316093	8	5.02574e-23	No	Yes	uc001efx.3;CASQ2;chr1:116306426-116316426;uc010owu.1;CASQ2;chr1:116306426-116316426;
chr1:116259341-116315421	56080	chr1	116259341	116263633	chr1	116312320	116315421	4	6.00477e-14	No	Yes	uc001efx.3;CASQ2;chr1:116306426-116316426;uc010owu.1;CASQ2;chr1:116306426-116316426;
chr1:116326691-116521016	194325	chr1	116326691	116330049	chr1	116518644	116521016	4	1.91671e-14	No	Yes	uc001ega.2;SLC22A15;chr1:116514118-116524118;uc001egb.3;SLC22A15;chr1:116514118-116524118;
chr1:116349327-116525727	176400	chr1	116349327	116359946	chr1	116517459	116525727	27	0	No	Yes	uc001ega.2;SLC22A15;chr1:116514118-116524118;uc001egb.3;SLC22A15;chr1:116514118-116524118;
chr1:116369865-116521227	151362	chr1	116369865	116374600	chr1	116518178	116521227	4	6.09748e-12	No	Yes	uc001ega.2;SLC22A15;chr1:116514118-116524118;uc001egb.3;SLC22A15;chr1:116514118-116524118;
chr1:116403658-116520399	116741	chr1	116403658	116407143	chr1	116518042	116520399	4	1.54805e-13	No	Yes	uc001ega.2;SLC22A15;chr1:116514118-116524118;uc001egb.3;SLC22A15;chr1:116514118-116524118;
chr1:116487411-116519774	32363	chr1	116487411	116490389	chr1	116517451	116519774	3	5.47223e-10	No	Yes	uc001ega.2;SLC22A15;chr1:116514118-116524118;uc001egb.3;SLC22A15;chr1:116514118-116524118;
chr1:116491285-116520895	29610	chr1	116491285	116494121	chr1	116517961	116520895	3	6.81617e-10	No	Yes	uc001ega.2;SLC22A15;chr1:116514118-116524118;uc001egb.3;SLC22A15;chr1:116514118-116524118;
chr1:116494172-116523397	29225	chr1	116494172	116499900	chr1	116517441	116523397	11	6.25377e-33	No	Yes	uc001ega.2;SLC22A15;chr1:116514118-116524118;uc001egb.3;SLC22A15;chr1:116514118-116524118;
chr1:116505256-116521000	15744	chr1	116505256	116508325	chr1	116517817	116521000	3	2.52254e-11	No	Yes	uc001ega.2;SLC22A15;chr1:116514118-116524118;uc001egb.3;SLC22A15;chr1:116514118-116524118;
chr1:116511377-116520551	9174	chr1	116511377	116514093	chr1	116517993	116520551	3	8.4679e-10	No	Yes	uc001ega.2;SLC22A15;chr1:116514118-116524118;uc001egb.3;SLC22A15;chr1:116514118-116524118;
chr1:116681511-117113867	432356	chr1	116681511	116683745	chr1	117111839	117113867	3	1.07263e-09	No	Yes	uc001egm.2;CD58;chr1:117108715-117118715;uc001egn.2;CD58;chr1:117108715-117118715;uc010owy.1;CD58;chr1:117108715-117118715;uc001egp.3;CD58;chr1:117108715-117118715;
chr1:116798117-116917343	119226	chr1	116798117	116801393	chr1	116913519	116917343	3	7.50697e-08	No	Yes	uc001egd.2;ATP1A1;chr1:116910794-116920794;uc010owv.1;ATP1A1;chr1:116910003-116920003;uc001ege.2;ATP1A1;chr1:116910794-116920794;uc010oww.1;ATP1A1;chr1:116911488-116921488;
chr1:116829683-116918787	89104	chr1	116829683	116834447	chr1	116915129	116918787	5	1.18704e-11	No	Yes	uc001egd.2;ATP1A1;chr1:116910794-116920794;uc010owv.1;ATP1A1;chr1:116910003-116920003;uc001ege.2;ATP1A1;chr1:116910794-116920794;uc010oww.1;ATP1A1;chr1:116911488-116921488;
chr1:116853200-116917395	64195	chr1	116853200	116857234	chr1	116913044	116917395	7	9.73359e-16	No	Yes	uc001egd.2;ATP1A1;chr1:116910794-116920794;uc010owv.1;ATP1A1;chr1:116910003-116920003;uc001ege.2;ATP1A1;chr1:116910794-116920794;uc010oww.1;ATP1A1;chr1:116911488-116921488;
chr1:116871180-116916570	45390	chr1	116871180	116874088	chr1	116914887	116916570	4	1.63493e-10	No	Yes	uc001egd.2;ATP1A1;chr1:116910794-116920794;uc010owv.1;ATP1A1;chr1:116910003-116920003;uc001ege.2;ATP1A1;chr1:116910794-116920794;uc010oww.1;ATP1A1;chr1:116911488-116921488;
chr1:117028259-117114850	86591	chr1	117028259	117030511	chr1	117112080	117114850	4	6.98364e-12	No	Yes	uc001egm.2;CD58;chr1:117108715-117118715;uc001egn.2;CD58;chr1:117108715-117118715;uc010owy.1;CD58;chr1:117108715-117118715;uc001egp.3;CD58;chr1:117108715-117118715;
chr1:117054043-117113623	59580	chr1	117054043	117057227	chr1	117110507	117113623	3	1.87456e-09	No	Yes	uc001egm.2;CD58;chr1:117108715-117118715;uc001egn.2;CD58;chr1:117108715-117118715;uc010owy.1;CD58;chr1:117108715-117118715;uc001egp.3;CD58;chr1:117108715-117118715;
chr1:117394294-117456422	62128	chr1	117394294	117398943	chr1	117449299	117456422	11	2.47285e-28	No	Yes	uc001egv.1;PTGFRN;chr1:117447688-117457688;
chr1:117419082-117603902	184820	chr1	117419082	117422750	chr1	117599849	117603902	4	2.41202e-10	No	Yes	uc001egx.1;TTF2;chr1:117597948-117607948;uc001egy.2;TTF2;chr1:117597948-117607948;
chr1:117419351-117447914	28563	chr1	117419351	117423869	chr1	117439092	117447914	12	1.31241e-35	No	Yes	uc001egv.1;PTGFRN;chr1:117447688-117457688;
chr1:117421831-117458031	36200	chr1	117421831	117424735	chr1	117455610	117458031	3	3.65281e-10	No	Yes	uc001egv.1;PTGFRN;chr1:117447688-117457688;
chr1:117427111-117450587	23476	chr1	117427111	117429385	chr1	117448174	117450587	4	2.04226e-14	No	Yes	uc001egv.1;PTGFRN;chr1:117447688-117457688;
chr1:117825728-117909850	84122	chr1	117825728	117827798	chr1	117905868	117909850	4	3.92595e-11	No	Yes	uc009whg.1;MAN1A2;chr1:117905084-117915084;uc001ehd.1;MAN1A2;chr1:117905084-117915084;
chr1:118071728-118150506	78778	chr1	118071728	118074534	chr1	118148335	118150506	3	4.10144e-10	No	Yes	uc001ehe.2;FAM46C;chr1:118143603-118153603;
chr1:118082252-118150219	67967	chr1	118082252	118084529	chr1	118147978	118150219	3	2.02526e-09	No	Yes	uc001ehe.2;FAM46C;chr1:118143603-118153603;
chr1:119470081-119684440	214359	chr1	119470081	119473238	chr1	119681807	119684440	3	6.88384e-12	No	Yes	uc010oxf.1;WARS2;chr1:119677973-119687973;uc010oxi.1;WARS2;chr1:119677973-119687973;uc001ehm.2;WARS2;chr1:119678295-119688295;uc001ehn.2;WARS2;chr1:119678295-119688295;uc010oxg.1;WARS2;chr1:119678295-119688295;uc010oxh.1;WARS2;chr1:119678295-119688295;uc001eho.1;BC063600;chr1:119678047-119688047;uc009whk.1;BC043601;chr1:119678047-119688047;uc001ehp.1;AK125759;chr1:119678047-119688047;
chr1:119543314-119684862	141548	chr1	119543314	119545923	chr1	119682082	119684862	3	5.24356e-11	No	Yes	uc010oxf.1;WARS2;chr1:119677973-119687973;uc010oxi.1;WARS2;chr1:119677973-119687973;uc001ehm.2;WARS2;chr1:119678295-119688295;uc001ehn.2;WARS2;chr1:119678295-119688295;uc010oxg.1;WARS2;chr1:119678295-119688295;uc010oxh.1;WARS2;chr1:119678295-119688295;uc001eho.1;BC063600;chr1:119678047-119688047;uc009whk.1;BC043601;chr1:119678047-119688047;uc001ehp.1;AK125759;chr1:119678047-119688047;
chr1:120295229-120303479	8250	chr1	120295229	120298701	chr1	120300751	120303479	3	5.09153e-13	No	Yes	uc001eie.2;HMGCS2;chr1:120302249-120312249;
chr1:145381610-145521043	139433	chr1	145381610	145384918	chr1	145518838	145521043	3	8.72139e-08	No	Yes	uc009wiv.1;GnRHRII;chr1:145510899-145520899;uc001enx.2;GnRHRII;chr1:145510899-145520899;uc010oyt.1;GNRHR2;chr1:145511076-145521076;uc001eny.1;PEX11B;chr1:145511382-145521382;uc010oyu.1;PEX11B;chr1:145511599-145521599;uc001enz.1;ITGA10;chr1:145519989-145529989;uc001eoa.2;ITGA10;chr1:145519989-145529989;uc010oyv.1;ITGA10;chr1:145519989-145529989;uc009wiw.2;ITGA10;chr1:145519989-145529989;
chr1:145419076-145545347	126271	chr1	145419076	145422198	chr1	145541212	145545347	4	3.30967e-12	No	Yes	uc010oyx.1;ANKRD35;chr1:145544208-145554208;uc001eob.1;ANKRD35;chr1:145544208-145554208;
chr1:145420334-145591214	170880	chr1	145420334	145423296	chr1	145588001	145591214	3	4.17197e-09	No	Yes	uc001eoe.2;NUDT17;chr1:145584435-145594435;uc001eof.1;AX747161;chr1:145585461-145595461;
chr1:145446991-145517111	70120	chr1	145446991	145450317	chr1	145513959	145517111	3	4.01033e-08	No	Yes	uc001enw.1;AL049219;chr1:145505431-145515431;uc009wiv.1;GnRHRII;chr1:145510899-145520899;uc001enx.2;GnRHRII;chr1:145510899-145520899;uc010oyt.1;GNRHR2;chr1:145511076-145521076;uc001eny.1;PEX11B;chr1:145511382-145521382;uc010oyu.1;PEX11B;chr1:145511599-145521599;
chr1:147071530-147090515	18985	chr1	147071530	147073456	chr1	147087258	147090515	3	1.76822e-10	No	Yes	uc010ozr.1;BCL9;chr1:147078376-147088376;
chr1:147117692-147144336	26644	chr1	147117692	147123079	chr1	147140177	147144336	6	9.36765e-19	No	Yes	uc001epr.2;ACP6;chr1:147137634-147147634;uc009wjj.1;ACP6;chr1:147137634-147147634;
chr1:147125294-147143336	18042	chr1	147125294	147131165	chr1	147136519	147143336	11	1.18591e-34	No	Yes	uc001epr.2;ACP6;chr1:147137634-147147634;uc009wjj.1;ACP6;chr1:147137634-147147634;
chr1:147222785-147230874	8089	chr1	147222785	147225486	chr1	147227739	147230874	3	1.10374e-12	No	Yes	uc001eps.1;GJA5;chr1:147227714-147237714;
chr1:147224461-147244708	20247	chr1	147224461	147227120	chr1	147242032	147244708	3	7.90847e-13	No	Yes	uc001ept.1;GJA5;chr1:147240484-147250484;
chr1:147381518-147398390	16872	chr1	147381518	147385211	chr1	147394468	147398390	4	8.43957e-17	No	Yes	uc010ozs.1;DKFZp434H1228;chr1:147395505-147405505;uc001epv.3;GPR89B;chr1:147395505-147405505;uc010ozt.1;GPR89A;chr1:147395505-147405505;uc010ozu.1;GPR89A;chr1:147395505-147405505;uc001epw.3;GPR89A;chr1:147395505-147405505;uc010ozv.1;GPR89A;chr1:147396128-147406128;
chr1:147734084-147749381	15297	chr1	147734084	147736905	chr1	147746905	147749381	3	2.65499e-09	No	Yes	uc001eqj.1;AK023548;chr1:147746388-147756388;uc001eqi.1;AK023809;chr1:147746385-147756385;
chr1:147766777-147808387	41610	chr1	147766777	147769716	chr1	147805305	147808387	4	1.63053e-12	No	Yes	uc001eqk.1;BC041003;chr1:147796123-147806123;
chr1:149221324-149901396	680072	chr1	149221324	149223859	chr1	149898568	149901396	3	0.000334621	No	Yes	uc001eti.1;SF3B4;chr1:149892945-149902945;uc001etj.1;SF3B4;chr1:149894962-149904962;uc009wll.1;SF3B4;chr1:149894962-149904962;uc001etk.1;SF3B4;chr1:149895236-149905236;
chr1:149931947-150039884	107937	chr1	149931947	149934324	chr1	150036027	150039884	4	1.47239e-12	No	Yes	uc010pbr.1;VPS45;chr1:150034399-150044399;uc009wlm.1;VPS45;chr1:150034341-150044341;uc010pbp.1;VPS45;chr1:150034341-150044341;uc001etp.2;VPS45;chr1:150034341-150044341;uc010pbq.1;VPS45;chr1:150034341-150044341;uc010pbs.1;VPS45;chr1:150034399-150044399;
chr1:150315314-150337567	22253	chr1	150315314	150317184	chr1	150334891	150337567	3	2.20059e-09	No	Yes	uc010pcc.1;KIAA0460;chr1:150331989-150341989;uc009wlr.2;RPRD2;chr1:150331989-150341989;uc001eup.3;RPRD2;chr1:150331989-150341989;
chr1:150445504-150461712	16208	chr1	150445504	150448744	chr1	150458410	150461712	4	8.1758e-14	No	Yes	uc010pcd.1;TARS2;chr1:150454919-150464919;uc001euq.2;TARS2;chr1:150454919-150464919;uc001eur.2;TARS2;chr1:150454919-150464919;uc009wlt.2;TARS2;chr1:150454919-150464919;uc009wls.2;TARS2;chr1:150454919-150464919;
chr1:150590605-150785230	194625	chr1	150590605	150592939	chr1	150782723	150785230	3	1.99809e-11	No	Yes	uc001evp.1;CTSK;chr1:150775812-150785812;uc001evq.1;CTSK;chr1:150775812-150785812;uc009wma.1;CTSK;chr1:150775812-150785812;uc010pck.1;ARNT;chr1:150784924-150794924;
chr1:151335378-151377494	42116	chr1	151335378	151338148	chr1	151374572	151377494	3	1.23886e-10	No	Yes	uc010pda.1;PSMB4;chr1:151367040-151377040;uc001eyb.1;PSMB4;chr1:151367040-151377040;uc001eyc.1;PSMB4;chr1:151367040-151377040;
chr1:151414283-151487481	73198	chr1	151414283	151420812	chr1	151481565	151487481	13	5.91016e-36	No	Yes	uc009wmw.2;CGN;chr1:151478861-151488861;
chr1:151415530-151514579	99049	chr1	151415530	151418373	chr1	151510570	151514579	6	4.74445e-17	No	Yes	uc010pde.1;KIAA1319;chr1:151501615-151511615;uc001eyl.2;TUFT1;chr1:151507780-151517780;uc001eym.2;TUFT1;chr1:151507780-151517780;uc010pdf.1;TUFT1;chr1:151507780-151517780;uc010pdg.1;TUFT1;chr1:151507780-151517780;
chr1:151444404-151513619	69215	chr1	151444404	151447140	chr1	151510457	151513619	3	1.36808e-07	No	Yes	uc010pde.1;KIAA1319;chr1:151501615-151511615;uc001eyl.2;TUFT1;chr1:151507780-151517780;uc001eym.2;TUFT1;chr1:151507780-151517780;uc010pdf.1;TUFT1;chr1:151507780-151517780;uc010pdg.1;TUFT1;chr1:151507780-151517780;
chr1:151444671-151482733	38062	chr1	151444671	151447654	chr1	151480134	151482733	3	1.11419e-10	No	Yes	uc009wmw.2;CGN;chr1:151478861-151488861;
chr1:151445312-151485583	40271	chr1	151445312	151448183	chr1	151483210	151485583	5	1.06377e-13	No	Yes	uc009wmw.2;CGN;chr1:151478861-151488861;
chr1:151461959-151486691	24732	chr1	151461959	151463906	chr1	151484479	151486691	3	6.74475e-11	No	Yes	uc009wmw.2;CGN;chr1:151478861-151488861;
chr1:151463912-151487656	23744	chr1	151463912	151470062	chr1	151482602	151487656	8	3.06074e-22	No	Yes	uc009wmw.2;CGN;chr1:151478861-151488861;
chr1:151494134-151506959	12825	chr1	151494134	151498303	chr1	151504253	151506959	4	2.41349e-16	No	Yes	uc010pde.1;KIAA1319;chr1:151501615-151511615;
chr1:151558823-151586141	27318	chr1	151558823	151561382	chr1	151583549	151586141	3	5.49321e-11	No	Yes	uc001eyn.1;SNX27;chr1:151579661-151589661;
chr1:151569138-151587169	18031	chr1	151569138	151571685	chr1	151583171	151587169	4	1.13295e-13	No	Yes	uc001eyn.1;SNX27;chr1:151579661-151589661;
chr1:151751164-151761091	9927	chr1	151751164	151754159	chr1	151759156	151761091	3	2.96958e-12	No	Yes	uc001ezb.3;TDRKH;chr1:151757964-151767964;uc001eyy.2;TDRKH;chr1:151758010-151768010;uc009wnb.1;TDRKH;chr1:151758010-151768010;uc001ezc.3;TDRKH;chr1:151758010-151768010;uc001eza.3;TDRKH;chr1:151758010-151768010;uc001ezd.3;TDRKH;chr1:151758010-151768010;uc010pdn.1;TDRKH;chr1:151758010-151768010;uc001eze.2;BC038201;chr1:151758317-151768317;
chr1:151857333-152010628	153295	chr1	151857333	151860480	chr1	152007205	152010628	3	6.15452e-08	No	Yes	uc001ezn.2;S100A11;chr1:152004511-152014511;
chr1:151859844-151972808	112964	chr1	151859844	151863422	chr1	151970039	151972808	5	1.49503e-16	No	Yes	uc001ezl.2;S100A10;chr1:151961714-151971714;uc001ezm.1;AK125884;chr1:151962006-151972006;
chr1:151861954-151882539	20585	chr1	151861954	151864936	chr1	151880646	151882539	4	4.31073e-13	No	Yes	uc001ezj.1;THEM4;chr1:151877113-151887113;uc001ezk.1;CTMP;chr1:151877113-151887113;
chr1:151864865-151964248	99383	chr1	151864865	151867501	chr1	151960955	151964248	3	5.3956e-09	No	Yes	uc001ezl.2;S100A10;chr1:151961714-151971714;uc001ezm.1;AK125884;chr1:151962006-151972006;
chr1:152019899-152062643	42744	chr1	152019899	152022172	chr1	152059534	152062643	3	1.00934e-08	No	Yes	uc001ezo.1;TCHHL1;chr1:152056540-152066540;
chr1:152023393-152083739	60346	chr1	152023393	152025689	chr1	152081392	152083739	7	7.0404e-23	No	Yes	uc001ezp.2;TCHH;chr1:152081587-152091587;
chr1:152024208-152061997	37789	chr1	152024208	152028585	chr1	152058296	152061997	4	1.15802e-13	No	Yes	uc001ezo.1;TCHHL1;chr1:152056540-152066540;
chr1:153264686-153337537	72851	chr1	153264686	153267365	chr1	153334525	153337537	3	1.57315e-10	No	Yes	uc001fbq.2;S100A9;chr1:153325329-153335329;
chr1:153336027-153583684	247657	chr1	153336027	153338853	chr1	153581594	153583684	4	1.46346e-09	No	Yes	uc001fcc.2;S100A16;chr1:153576481-153586481;uc001fcd.1;S100A16;chr1:153580514-153590514;
chr1:153479500-153542576	63076	chr1	153479500	153482310	chr1	153538620	153542576	5	1.70974e-16	No	Yes	uc001fcb.2;S100A2;chr1:153533306-153543306;
chr1:153480481-153586017	105536	chr1	153480481	153484963	chr1	153582556	153586017	6	1.98668e-16	No	Yes	uc001fcc.2;S100A16;chr1:153576481-153586481;uc001fcd.1;S100A16;chr1:153580514-153590514;uc001fce.2;S100A14;chr1:153583790-153593790;
chr1:153485492-153585636	100144	chr1	153485492	153490407	chr1	153581456	153585636	6	2.51272e-15	No	Yes	uc001fcc.2;S100A16;chr1:153576481-153586481;uc001fcd.1;S100A16;chr1:153580514-153590514;uc001fce.2;S100A14;chr1:153583790-153593790;
chr1:153485703-153509498	23795	chr1	153485703	153488106	chr1	153505730	153509498	3	5.0651e-10	No	Yes	uc001fbw.1;S100A6;chr1:153503717-153513717;uc001fbx.2;S100A5;chr1:153509241-153519241;
chr1:153492157-153541270	49113	chr1	153492157	153493956	chr1	153538151	153541270	3	7.40007e-11	No	Yes	uc001fcb.2;S100A2;chr1:153533306-153543306;
chr1:153545133-153633593	88460	chr1	153545133	153546799	chr1	153630343	153633593	3	2.87706e-10	No	Yes	uc001fcq.2;SNAPIN;chr1:153626144-153636144;
chr1:153555980-153606052	50072	chr1	153555980	153560122	chr1	153603661	153606052	3	4.85453e-11	No	Yes	uc001fcf.3;S100A13;chr1:153594539-153604539;uc001fcg.2;S100A13;chr1:153594744-153604744;uc009woh.2;S100A13;chr1:153594744-153604744;uc001fch.2;S100A13;chr1:153595117-153605117;uc001fci.2;S100A13;chr1:153595713-153605713;uc001fck.1;S100A1;chr1:153595872-153605872;uc001fcl.1;S100A1;chr1:153595872-153605872;uc001fcj.2;S100A13;chr1:153601568-153611568;uc009woi.1;pp7704;chr1:153601524-153611524;uc009w…
chr1:153668419-153701905	33486	chr1	153668419	153672342	chr1	153699600	153701905	4	1.0496e-13	No	Yes	uc009wom.2;INTS3;chr1:153695548-153705548;uc001fct.2;INTS3;chr1:153695566-153705566;uc001fcu.2;DKFZp686I1710;chr1:153695566-153705566;uc001fcv.2;INTS3;chr1:153695566-153705566;
chr1:153707078-153722643	15565	chr1	153707078	153709228	chr1	153718414	153722643	3	7.52598e-13	No	Yes	uc010peb.1;INTS3;chr1:153718329-153728329;uc001fcw.2;INTS3;chr1:153718570-153728570;
chr1:153754767-153919797	165030	chr1	153754767	153757763	chr1	153916863	153919797	5	7.94394e-14	No	Yes	uc001fdd.1;DENND4B;chr1:153914154-153924154;
chr1:153769778-153923010	153232	chr1	153769778	153772240	chr1	153919486	153923010	3	1.13539e-10	No	Yes	uc001fdd.1;DENND4B;chr1:153914154-153924154;uc001fde.3;TORC2;chr1:153921790-153931790;uc001fdf.3;TORC2;chr1:153921790-153931790;
chr1:153771018-153960280	189262	chr1	153771018	153773380	chr1	153956396	153960280	3	6.93469e-11	No	Yes	uc001fdt.1;RAB13;chr1:153953806-153963806;uc001fdu.1;RAB13;chr1:153953806-153963806;uc001fdv.2;RPS27;chr1:153958238-153968238;
chr1:153774428-153894443	120015	chr1	153774428	153778178	chr1	153892159	153894443	3	5.47433e-11	No	Yes	uc001fdb.3;GATAD2B;chr1:153890451-153900451;uc001fdc.1;CR613795;chr1:153890878-153900878;
chr1:153774458-153919240	144782	chr1	153774458	153777445	chr1	153916897	153919240	3	8.36805e-10	No	Yes	uc001fdd.1;DENND4B;chr1:153914154-153924154;
chr1:153790058-153895601	105543	chr1	153790058	153791685	chr1	153891710	153895601	3	4.55012e-11	No	Yes	uc001fdb.3;GATAD2B;chr1:153890451-153900451;uc001fdc.1;CR613795;chr1:153890878-153900878;
chr1:153797679-153919852	122173	chr1	153797679	153802032	chr1	153916832	153919852	5	5.68235e-17	No	Yes	uc001fdd.1;DENND4B;chr1:153914154-153924154;
chr1:154450305-154527096	76791	chr1	154450305	154454149	chr1	154524357	154527096	3	6.01435e-12	No	Yes	uc001fff.1;UBE2Q1;chr1:154526120-154536120;
chr1:154546778-154581578	34800	chr1	154546778	154551226	chr1	154579208	154581578	3	1.9838e-10	No	Yes	uc001ffl.1;ADAR;chr1:154573494-154583494;uc001ffm.1;ADAR;chr1:154573494-154583494;uc001ffh.2;ADAR;chr1:154575682-154585682;uc001ffj.2;ADAR;chr1:154575682-154585682;uc001ffi.2;ADAR;chr1:154575682-154585682;uc001ffn.1;ADAR;chr1:154575682-154585682;
chr1:155012616-155165166	152550	chr1	155012616	155017280	chr1	155162185	155165166	4	2.84875e-11	No	Yes	uc001fhy.2;MUC1;chr1:155156158-155166158;uc001fhz.2;MUC1;chr1:155156398-155166398;uc009wqh.2;MUC1;chr1:155156619-155166619;uc010pfb.1;MUC1;chr1:155157101-155167101;uc010pfc.1;MUC1;chr1:155157684-155167684;uc009wph.2;MUC1;chr1:155157684-155167684;uc010pfd.1;MUC1;chr1:155157684-155167684;uc010pfe.1;MUC1;chr1:155157684-155167684;uc010pff.1;MUC1;chr1:155157684-155167684;uc009wpi.2;MUC1;chr1:155157684…
chr1:155015827-155103552	87725	chr1	155015827	155017809	chr1	155100407	155103552	3	2.9116e-08	No	Yes	uc009wpd.1;AK308965;chr1:155100263-155110263;uc001fhh.2;EFNA1;chr1:155095348-155105348;uc001fhi.2;EFNA1;chr1:155095348-155105348;uc001fhj.3;RAG1AP1;chr1:155103287-155113287;uc001fhk.3;RAG1AP1;chr1:155103287-155113287;uc001fhl.3;RAG1AP1;chr1:155103287-155113287;uc010pey.1;RAG1AP1;chr1:155103287-155113287;
chr1:155969539-156032929	63390	chr1	155969539	155973742	chr1	156029424	156032929	5	2.36458e-17	No	Yes	uc001fnb.3;ROBLD3;chr1:156019516-156029516;uc010pgy.1;ROBLD3;chr1:156019516-156029516;uc001fnc.2;RAB25;chr1:156025965-156035965;
chr1:156279316-156305928	26612	chr1	156279316	156282501	chr1	156303484	156305928	3	1.47259e-12	No	Yes	uc001fol.1;CCT3;chr1:156303195-156313195;uc001fom.1;CCT3;chr1:156303195-156313195;uc001fon.1;CCT3;chr1:156303195-156313195;uc010phj.1;CCT3;chr1:156303195-156313195;uc010phk.1;DKFZp667A196;chr1:156303195-156313195;uc010phl.1;DKFZp667A196;chr1:156303195-156313195;uc001foo.2;C1orf182;chr1:156302104-156312104;uc009wry.2;C1orf182;chr1:156303332-156313332;uc001fop.3;C1orf182;chr1:156303332-156313332;
chr1:161022923-161068194	45271	chr1	161022923	161025927	chr1	161065904	161068194	3	1.86748e-12	No	Yes	uc001fxq.2;KLHDC9;chr1:161063153-161073153;uc001fxs.2;KLHDC9;chr1:161063153-161073153;uc001fxr.2;KLHDC9;chr1:161063153-161073153;
chr1:168674549-169077657	403108	chr1	168674549	168676418	chr1	169074810	169077657	3	1.4059e-10	No	Yes	uc001gfr.1;ATP1B1;chr1:169070946-169080946;uc001gfs.1;ATP1B1;chr1:169070946-169080946;
chr1:168677511-169077716	400205	chr1	168677511	168680234	chr1	169074127	169077716	6	4.34819e-18	No	Yes	uc001gfr.1;ATP1B1;chr1:169070946-169080946;uc001gfs.1;ATP1B1;chr1:169070946-169080946;
chr1:168717969-169079192	361223	chr1	168717969	168723195	chr1	169075012	169079192	7	2.56206e-22	No	Yes	uc001gfr.1;ATP1B1;chr1:169070946-169080946;uc001gfs.1;ATP1B1;chr1:169070946-169080946;
chr1:168865232-169077247	212015	chr1	168865232	168870287	chr1	169075405	169077247	5	4.20998e-16	No	Yes	uc001gfr.1;ATP1B1;chr1:169070946-169080946;uc001gfs.1;ATP1B1;chr1:169070946-169080946;
chr1:168872707-169079301	206594	chr1	168872707	168877840	chr1	169073874	169079301	15	8.29849e-42	No	Yes	uc001gfr.1;ATP1B1;chr1:169070946-169080946;uc001gfs.1;ATP1B1;chr1:169070946-169080946;
chr1:168887188-169079040	191852	chr1	168887188	168892256	chr1	169072302	169079040	8	1.18253e-22	No	Yes	uc001gfr.1;ATP1B1;chr1:169070946-169080946;uc001gfs.1;ATP1B1;chr1:169070946-169080946;
chr1:168892272-169078595	186323	chr1	168892272	168894624	chr1	169075493	169078595	4	6.72983e-13	No	Yes	uc001gfr.1;ATP1B1;chr1:169070946-169080946;uc001gfs.1;ATP1B1;chr1:169070946-169080946;
chr1:168894738-169076984	182246	chr1	168894738	168897178	chr1	169075088	169076984	3	4.81383e-11	No	Yes	uc001gfr.1;ATP1B1;chr1:169070946-169080946;uc001gfs.1;ATP1B1;chr1:169070946-169080946;
chr1:168907357-169079423	172066	chr1	168907357	168910687	chr1	169076812	169079423	3	4.75119e-11	No	Yes	uc001gfr.1;ATP1B1;chr1:169070946-169080946;uc001gfs.1;ATP1B1;chr1:169070946-169080946;
chr1:168943806-169077350	133544	chr1	168943806	168946141	chr1	169074438	169077350	3	2.82642e-10	No	Yes	uc001gfr.1;ATP1B1;chr1:169070946-169080946;uc001gfs.1;ATP1B1;chr1:169070946-169080946;
chr1:168958938-169078958	120020	chr1	168958938	168962955	chr1	169074649	169078958	5	1.20816e-15	No	Yes	uc001gfr.1;ATP1B1;chr1:169070946-169080946;uc001gfs.1;ATP1B1;chr1:169070946-169080946;
chr1:169039714-169076849	37135	chr1	169039714	169043585	chr1	169072695	169076849	6	3.27806e-19	No	Yes	uc001gfr.1;ATP1B1;chr1:169070946-169080946;uc001gfs.1;ATP1B1;chr1:169070946-169080946;
chr1:169045647-169078389	32742	chr1	169045647	169050705	chr1	169071889	169078389	7	3.95828e-21	No	Yes	uc001gfr.1;ATP1B1;chr1:169070946-169080946;uc001gfs.1;ATP1B1;chr1:169070946-169080946;
chr1:169727288-169765859	38571	chr1	169727288	169729561	chr1	169762076	169765859	3	2.94833e-12	No	Yes	uc001ggn.2;C1orf156;chr1:169759031-169769031;uc010plt.1;C1orf112;chr1:169759183-169769183;uc001ggo.2;C1orf112;chr1:169758870-169768870;uc010plu.1;C1orf112;chr1:169762997-169772997;uc009wvu.1;C1orf112;chr1:169762997-169772997;uc001ggp.2;C1orf112;chr1:169759226-169769226;uc001ggq.2;C1orf112;chr1:169759549-169769549;uc009wvt.2;C1orf112;chr1:169759969-169769969;uc001ggr.2;C1orf112;chr1:169762997-1697…
chr1:172432677-172504354	71677	chr1	172432677	172435366	chr1	172500989	172504354	4	4.82276e-14	No	Yes	uc010pmm.1;C1orf9;chr1:172497259-172507259;uc001giq.3;C1orf9;chr1:172497259-172507259;uc009wwd.2;C1orf9;chr1:172497316-172507316;uc010pmn.1;C1orf9;chr1:172497316-172507316;uc010pmo.1;CH1;chr1:172497316-172507316;
chr1:172440495-172500697	60202	chr1	172440495	172444630	chr1	172497465	172500697	4	1.6642e-14	No	Yes	uc010pmm.1;C1orf9;chr1:172497259-172507259;uc001giq.3;C1orf9;chr1:172497259-172507259;uc009wwd.2;C1orf9;chr1:172497316-172507316;uc010pmn.1;C1orf9;chr1:172497316-172507316;uc010pmo.1;CH1;chr1:172497316-172507316;
chr1:172440631-172503673	63042	chr1	172440631	172443212	chr1	172501569	172503673	3	3.04563e-10	No	Yes	uc010pmm.1;C1orf9;chr1:172497259-172507259;uc001giq.3;C1orf9;chr1:172497259-172507259;uc009wwd.2;C1orf9;chr1:172497316-172507316;uc010pmn.1;C1orf9;chr1:172497316-172507316;uc010pmo.1;CH1;chr1:172497316-172507316;
chr1:172443879-172503799	59920	chr1	172443879	172448097	chr1	172501090	172503799	4	3.69525e-12	No	Yes	uc010pmm.1;C1orf9;chr1:172497259-172507259;uc001giq.3;C1orf9;chr1:172497259-172507259;uc009wwd.2;C1orf9;chr1:172497316-172507316;uc010pmn.1;C1orf9;chr1:172497316-172507316;uc010pmo.1;CH1;chr1:172497316-172507316;
chr1:174873499-174970302	96803	chr1	174873499	174877029	chr1	174967125	174970302	3	9.4317e-11	No	Yes	uc010pmw.1;CACYBP;chr1:174963891-174973891;uc001gki.1;CACYBP;chr1:174963570-174973570;uc001gkj.1;CACYBP;chr1:174963891-174973891;
chr1:178624245-178697470	73225	chr1	178624245	178629892	chr1	178692654	178697470	11	2.60406e-36	No	Yes	uc001gly.1;RALGPS2;chr1:178689299-178699299;uc001glz.2;RALGPS2;chr1:178689299-178699299;uc010pnb.1;RALGPS2;chr1:178689299-178699299;
chr1:178674591-178695575	20984	chr1	178674591	178676141	chr1	178692587	178695575	3	4.58004e-12	No	Yes	uc001gly.1;RALGPS2;chr1:178689299-178699299;uc001glz.2;RALGPS2;chr1:178689299-178699299;uc010pnb.1;RALGPS2;chr1:178689299-178699299;
chr1:178682844-178696062	13218	chr1	178682844	178687684	chr1	178691976	178696062	9	1.38958e-32	No	Yes	uc001gly.1;RALGPS2;chr1:178689299-178699299;uc001glz.2;RALGPS2;chr1:178689299-178699299;uc010pnb.1;RALGPS2;chr1:178689299-178699299;
chr1:179029337-179052010	22673	chr1	179029337	179031830	chr1	179049243	179052010	3	2.0139e-11	No	Yes	uc001gmd.2;TOR3A;chr1:179046111-179056111;uc010pnd.1;ADIR;chr1:179046111-179056111;
chr1:180103058-180125496	22438	chr1	180103058	180105624	chr1	180121749	180125496	3	5.54858e-11	No	Yes	uc001gny.2;QSOX1;chr1:180118967-180128967;uc001gnz.2;QSOX1;chr1:180118967-180128967;uc001goa.2;QSOX1;chr1:180118967-180128967;
chr1:180499940-180603584	103644	chr1	180499940	180502814	chr1	180597459	180603584	7	1.384e-26	No	Yes	uc009wxm.2;XPR1;chr1:180596145-180606145;uc001goi.2;XPR1;chr1:180596145-180606145;uc009wxn.2;XPR1;chr1:180596145-180606145;
chr1:180848547-181056742	208195	chr1	180848547	180852061	chr1	181053599	181056742	3	1.0319e-10	No	Yes	uc001got.3;IER5;chr1:181052637-181062637;
chr1:180855821-180879005	23184	chr1	180855821	180859018	chr1	180875717	180879005	3	1.97391e-12	No	Yes	uc001gok.2;KIAA1614;chr1:180877312-180887312;
chr1:180921716-180993659	71943	chr1	180921716	180926405	chr1	180990463	180993659	6	4.23407e-16	No	Yes	uc010pnq.1;STX6;chr1:180987046-180997046;uc001goo.2;STX6;chr1:180987046-180997046;uc010pnr.1;STX6;chr1:180987046-180997046;
chr1:180922269-181059480	137211	chr1	180922269	180924346	chr1	181056350	181059480	3	2.78732e-07	No	Yes	uc001got.3;IER5;chr1:181052637-181062637;
chr1:180929325-180993069	63744	chr1	180929325	180932935	chr1	180990437	180993069	4	1.90936e-12	No	Yes	uc010pnq.1;STX6;chr1:180987046-180997046;uc001goo.2;STX6;chr1:180987046-180997046;uc010pnr.1;STX6;chr1:180987046-180997046;
chr1:180961851-180993107	31256	chr1	180961851	180967082	chr1	180990297	180993107	5	1.72233e-15	No	Yes	uc010pnq.1;STX6;chr1:180987046-180997046;uc001goo.2;STX6;chr1:180987046-180997046;uc010pnr.1;STX6;chr1:180987046-180997046;
chr1:182064612-182363593	298981	chr1	182064612	182070268	chr1	182359219	182363593	6	1.0439e-18	No	Yes	uc010pnt.1;GLUL;chr1:182349717-182359717;uc001gpa.1;GLUL;chr1:182355508-182365508;uc001gpb.1;GLUL;chr1:182355924-182365924;uc001gpc.1;GLUL;chr1:182355950-182365950;uc001gpd.1;GLUL;chr1:182355950-182365950;
chr1:182579340-182809895	230555	chr1	182579340	182582377	chr1	182807188	182809895	3	7.88489e-10	No	Yes	uc001gpr.2;DHX9;chr1:182803450-182813450;uc001gps.2;DHX9;chr1:182803450-182813450;
chr1:182625424-182643517	18093	chr1	182625424	182628231	chr1	182640814	182643517	3	2.28257e-13	No	Yes	uc010pnw.1;RGS8;chr1:182636064-182646064;uc001gpn.1;RGS8;chr1:182637067-182647067;uc001gpm.1;RGS8;chr1:182637067-182647067;
chr1:182929270-182994329	65059	chr1	182929270	182933401	chr1	182991092	182994329	6	3.40432e-20	No	Yes	uc001gpx.2;LAMC1;chr1:182987594-182997594;uc001gpy.3;LAMC1;chr1:182987594-182997594;
chr1:182933709-182993859	60150	chr1	182933709	182937718	chr1	182990400	182993859	5	6.60525e-18	No	Yes	uc001gpx.2;LAMC1;chr1:182987594-182997594;uc001gpy.3;LAMC1;chr1:182987594-182997594;
chr1:182943214-182996094	52880	chr1	182943214	182945468	chr1	182991916	182996094	3	4.88843e-11	No	Yes	uc001gpx.2;LAMC1;chr1:182987594-182997594;uc001gpy.3;LAMC1;chr1:182987594-182997594;
chr1:183119159-183155439	36280	chr1	183119159	183121550	chr1	183152948	183155439	3	1.95475e-12	No	Yes	uc001gpz.3;LAMC2;chr1:183150173-183160173;uc010poa.1;LAMC2;chr1:183150173-183160173;uc001gqa.2;LAMC2;chr1:183150173-183160173;
chr1:183132422-183151815	19393	chr1	183132422	183137866	chr1	183147841	183151815	9	1.22463e-35	No	Yes	uc001gpz.3;LAMC2;chr1:183150173-183160173;uc010poa.1;LAMC2;chr1:183150173-183160173;uc001gqa.2;LAMC2;chr1:183150173-183160173;
chr1:183141337-183157031	15694	chr1	183141337	183143426	chr1	183154953	183157031	3	2.97255e-12	No	Yes	uc001gpz.3;LAMC2;chr1:183150173-183160173;uc010poa.1;LAMC2;chr1:183150173-183160173;uc001gqa.2;LAMC2;chr1:183150173-183160173;
chr1:183299942-183441839	141897	chr1	183299942	183302112	chr1	183439119	183441839	3	2.91301e-10	No	Yes	uc001gqe.2;BC032873;chr1:183435881-183445881;uc010pob.1;SMG7;chr1:183436633-183446633;uc001gqf.2;SMG7;chr1:183436633-183446633;uc001gqh.2;SMG7;chr1:183436633-183446633;uc001gqg.2;SMG7;chr1:183436633-183446633;uc001gqi.2;SMG7;chr1:183436633-183446633;uc010poc.1;SMG7;chr1:183436633-183446633;
chr1:183308372-183442158	133786	chr1	183308372	183311197	chr1	183439378	183442158	3	1.33766e-10	No	Yes	uc001gqe.2;BC032873;chr1:183435881-183445881;uc010pob.1;SMG7;chr1:183436633-183446633;uc001gqf.2;SMG7;chr1:183436633-183446633;uc001gqh.2;SMG7;chr1:183436633-183446633;uc001gqg.2;SMG7;chr1:183436633-183446633;uc001gqi.2;SMG7;chr1:183436633-183446633;uc010poc.1;SMG7;chr1:183436633-183446633;
chr1:183376779-183442510	65731	chr1	183376779	183379476	chr1	183440257	183442510	3	3.53046e-11	No	Yes	uc001gqe.2;BC032873;chr1:183435881-183445881;uc010pob.1;SMG7;chr1:183436633-183446633;uc001gqf.2;SMG7;chr1:183436633-183446633;uc001gqh.2;SMG7;chr1:183436633-183446633;uc001gqg.2;SMG7;chr1:183436633-183446633;uc001gqi.2;SMG7;chr1:183436633-183446633;uc010poc.1;SMG7;chr1:183436633-183446633;
chr1:197844025-197873656	29631	chr1	197844025	197847806	chr1	197870226	197873656	3	1.94675e-11	No	Yes	uc001guh.2;C1orf53;chr1:197866681-197876681;
chr1:198855774-198907943	52169	chr1	198855774	198858957	chr1	198904447	198907943	4	1.27356e-13	No	Yes	uc001guz.2;EF413001;chr1:198901558-198911558;
chr1:198874553-198907178	32625	chr1	198874553	198877467	chr1	198903839	198907178	4	8.19335e-14	No	Yes	uc001guz.2;EF413001;chr1:198901558-198911558;
chr1:198879898-198907636	27738	chr1	198879898	198882977	chr1	198904968	198907636	3	6.78414e-11	No	Yes	uc001guz.2;EF413001;chr1:198901558-198911558;
chr1:198884676-198906256	21580	chr1	198884676	198887985	chr1	198902501	198906256	4	1.53107e-14	No	Yes	uc001guz.2;EF413001;chr1:198901558-198911558;
chr1:198896519-198908250	11731	chr1	198896519	198898840	chr1	198905719	198908250	3	1.04144e-10	No	Yes	uc001guz.2;EF413001;chr1:198901558-198911558;
chr1:200819710-200865457	45747	chr1	200819710	200822741	chr1	200862794	200865457	3	8.96834e-11	No	Yes	uc001gvo.2;C1orf106;chr1:200855638-200865638;uc010ppm.1;C1orf106;chr1:200858998-200868998;
chr1:201053651-201085754	32103	chr1	201053651	201058993	chr1	201080756	201085754	11	1.9229e-38	No	Yes	uc001gvv.2;CACNA1S;chr1:201076694-201086694;
chr1:201066587-201085341	18754	chr1	201066587	201070476	chr1	201082441	201085341	5	2.43591e-18	No	Yes	uc001gvv.2;CACNA1S;chr1:201076694-201086694;
chr1:201221603-201258078	36475	chr1	201221603	201225242	chr1	201253742	201258078	5	2.876e-17	No	Yes	uc001gwd.2;PKP1;chr1:201247579-201257579;uc001gwe.2;PKP1;chr1:201247579-201257579;uc009wzm.2;PKP1;chr1:201247579-201257579;
chr1:201222597-201331831	109234	chr1	201222597	201224979	chr1	201329492	201331831	3	2.13476e-12	No	Yes	uc009wzn.2;HNTN1;chr1:201325497-201335497;uc009wzo.2;HNTN1;chr1:201325497-201335497;uc009wzp.2;HNTN1;chr1:201326150-201336150;uc001gwj.1;AK055533;chr1:201328316-201338316;uc009wzs.1;TNNT2;chr1:201331094-201341094;
chr1:201275813-201326011	50198	chr1	201275813	201281789	chr1	201321764	201326011	10	2.38577e-29	No	Yes	uc009wzn.2;HNTN1;chr1:201325497-201335497;uc009wzo.2;HNTN1;chr1:201325497-201335497;
chr1:201277630-201330817	53187	chr1	201277630	201280072	chr1	201326204	201330817	5	1.04901e-15	No	Yes	uc009wzn.2;HNTN1;chr1:201325497-201335497;uc009wzo.2;HNTN1;chr1:201325497-201335497;uc009wzp.2;HNTN1;chr1:201326150-201336150;uc001gwj.1;AK055533;chr1:201328316-201338316;
chr1:201407216-201438505	31289	chr1	201407216	201410748	chr1	201436001	201438505	3	5.59175e-10	No	Yes	uc009wzx.2;PHLDA3;chr1:201433234-201443234;uc001gwq.2;PHLDA3;chr1:201433299-201443299;
chr1:201674626-201709989	35363	chr1	201674626	201676528	chr1	201707314	201709989	3	2.26659e-11	No	Yes	uc001gwv.1;NAV1;chr1:201703653-201713653;uc001gww.1;NAV1;chr1:201703995-201713995;uc001gwx.2;NAV1;chr1:201703995-201713995;
chr1:201679647-201711496	31849	chr1	201679647	201683746	chr1	201707489	201711496	10	1.83723e-30	No	Yes	uc001gwv.1;NAV1;chr1:201703653-201713653;uc001gww.1;NAV1;chr1:201703995-201713995;uc001gwx.2;NAV1;chr1:201703995-201713995;
chr1:202647503-202779698	132195	chr1	202647503	202649975	chr1	202776076	202779698	3	1.19835e-09	No	Yes	uc001gyg.1;KDM5B;chr1:202771427-202781427;uc001gyf.2;KDM5B;chr1:202772549-202782549;uc009xag.2;KDM5B;chr1:202772549-202782549;
chr1:202709872-202781423	71551	chr1	202709872	202712062	chr1	202778585	202781423	4	4.32629e-13	No	Yes	uc001gyg.1;KDM5B;chr1:202771427-202781427;uc001gyf.2;KDM5B;chr1:202772549-202782549;uc009xag.2;KDM5B;chr1:202772549-202782549;
chr1:202716874-202832297	115423	chr1	202716874	202722254	chr1	202828313	202832297	7	7.04525e-20	No	Yes	uc001gyi.1;AX721218;chr1:202825736-202835736;uc001gyj.2;BC049825;chr1:202825736-202835736;uc001gyk.1;LOC148709;chr1:202825881-202835881;
chr1:202717045-202779341	62296	chr1	202717045	202724152	chr1	202774541	202779341	13	1.40051e-36	No	Yes	uc001gyg.1;KDM5B;chr1:202771427-202781427;uc001gyf.2;KDM5B;chr1:202772549-202782549;uc009xag.2;KDM5B;chr1:202772549-202782549;
chr1:202718698-202782318	63620	chr1	202718698	202723129	chr1	202779427	202782318	7	3.6441e-20	No	Yes	uc001gyg.1;KDM5B;chr1:202771427-202781427;uc001gyf.2;KDM5B;chr1:202772549-202782549;uc009xag.2;KDM5B;chr1:202772549-202782549;
chr1:202722784-202830929	108145	chr1	202722784	202725276	chr1	202828105	202830929	3	4.08501e-10	No	Yes	uc001gyi.1;AX721218;chr1:202825736-202835736;uc001gyj.2;BC049825;chr1:202825736-202835736;uc001gyk.1;LOC148709;chr1:202825881-202835881;
chr1:202753803-202832440	78637	chr1	202753803	202757992	chr1	202830325	202832440	4	8.98391e-13	No	Yes	uc001gyi.1;AX721218;chr1:202825736-202835736;uc001gyj.2;BC049825;chr1:202825736-202835736;uc001gyk.1;LOC148709;chr1:202825881-202835881;
chr1:202768497-202832507	64010	chr1	202768497	202770628	chr1	202829147	202832507	3	1.26061e-09	No	Yes	uc001gyi.1;AX721218;chr1:202825736-202835736;uc001gyj.2;BC049825;chr1:202825736-202835736;uc001gyk.1;LOC148709;chr1:202825881-202835881;
chr1:202802489-202826426	23937	chr1	202802489	202805678	chr1	202822354	202826426	4	1.3007e-12	No	Yes	uc001gyi.1;AX721218;chr1:202825736-202835736;uc001gyj.2;BC049825;chr1:202825736-202835736;uc001gyk.1;LOC148709;chr1:202825881-202835881;
chr1:202803881-202832077	28196	chr1	202803881	202809176	chr1	202827762	202832077	6	1.24796e-14	No	Yes	uc001gyi.1;AX721218;chr1:202825736-202835736;uc001gyj.2;BC049825;chr1:202825736-202835736;uc001gyk.1;LOC148709;chr1:202825881-202835881;
chr1:202865120-202897674	32554	chr1	202865120	202867461	chr1	202894786	202897674	3	5.81076e-11	No	Yes	uc001gyo.1;KLHL12;chr1:202891371-202901371;uc009xah.1;KLHL12;chr1:202891371-202901371;uc010pqc.1;KLHL12;chr1:202892727-202902727;
chr1:203837209-204043800	206591	chr1	203837209	203839710	chr1	204041003	204043800	3	2.71149e-10	No	Yes	uc001hal.2;SOX13;chr1:204037245-204047245;uc001ham.2;SOX13;chr1:204037245-204047245;
chr1:203839381-204049504	210123	chr1	203839381	203843169	chr1	204045256	204049504	4	1.49052e-13	No	Yes	uc001hal.2;SOX13;chr1:204037245-204047245;uc001ham.2;SOX13;chr1:204037245-204047245;
chr1:203839919-204044593	204674	chr1	203839919	203842316	chr1	204041709	204044593	3	1.59383e-09	No	Yes	uc001hal.2;SOX13;chr1:204037245-204047245;uc001ham.2;SOX13;chr1:204037245-204047245;
chr1:203996703-204006615	9912	chr1	203996703	203998865	chr1	204003452	204006615	3	4.45946e-14	No	Yes	uc001haj.2;C1orf157;chr1:204005392-204015392;uc001hak.2;C1orf157;chr1:204005392-204015392;uc010pqo.1;C1orf157;chr1:204005392-204015392;
chr1:204047628-204078659	31031	chr1	204047628	204049951	chr1	204076325	204078659	3	3.32997e-12	No	Yes	uc010pqp.1;SOX13;chr1:204077042-204087042;
chr1:204071752-204083727	11975	chr1	204071752	204074828	chr1	204082131	204083727	3	1.81342e-12	No	Yes	uc010pqp.1;SOX13;chr1:204077042-204087042;uc010pqq.1;SOX13;chr1:204080192-204090192;
chr1:204096041-204122058	26017	chr1	204096041	204104105	chr1	204115481	204122058	10	6.35338e-31	No	Yes	uc001hap.2;BC038769;chr1:204105535-204115535;uc010pqr.1;ETNK2;chr1:204111083-204121083;uc001hao.3;ETNK2;chr1:204116307-204126307;uc001han.3;ETNK2;chr1:204116307-204126307;uc010pqs.1;ETNK2;chr1:204116307-204126307;uc010pqt.1;HMFT1716;chr1:204116307-204126307;
chr1:204142002-204160909	18907	chr1	204142002	204145755	chr1	204157234	204160909	3	4.42376e-12	No	Yes	uc001har.2;KISS1;chr1:204160619-204170619;
chr1:204345967-204466079	120112	chr1	204345967	204349817	chr1	204462065	204466079	3	6.38628e-08	No	Yes	uc001haw.2;PIK3C2B;chr1:204454474-204464474;uc010pqv.1;PIK3C2B;chr1:204454474-204464474;uc009xbd.1;PIK3C2B;chr1:204454474-204464474;uc001hax.1;PIK3C2B;chr1:204458852-204468852;
chr1:204408977-204464902	55925	chr1	204408977	204417564	chr1	204461305	204464902	14	3.97857e-41	No	Yes	uc001haw.2;PIK3C2B;chr1:204454474-204464474;uc010pqv.1;PIK3C2B;chr1:204454474-204464474;uc009xbd.1;PIK3C2B;chr1:204454474-204464474;uc001hax.1;PIK3C2B;chr1:204458852-204468852;
chr1:204417856-204465648	47792	chr1	204417856	204421473	chr1	204462062	204465648	7	1.30872e-22	No	Yes	uc001haw.2;PIK3C2B;chr1:204454474-204464474;uc010pqv.1;PIK3C2B;chr1:204454474-204464474;uc009xbd.1;PIK3C2B;chr1:204454474-204464474;uc001hax.1;PIK3C2B;chr1:204458852-204468852;
chr1:204426790-204465789	38999	chr1	204426790	204430387	chr1	204462005	204465789	4	4.53149e-13	No	Yes	uc001haw.2;PIK3C2B;chr1:204454474-204464474;uc010pqv.1;PIK3C2B;chr1:204454474-204464474;uc009xbd.1;PIK3C2B;chr1:204454474-204464474;uc001hax.1;PIK3C2B;chr1:204458852-204468852;
chr1:204903469-204913054	9585	chr1	204903469	204907165	chr1	204910370	204913054	3	3.83837e-13	No	Yes	uc010prb.1;NFASC;chr1:204908353-204918353;uc010prc.1;NFASC;chr1:204908353-204918353;
chr1:204939711-205091588	151877	chr1	204939711	204943676	chr1	205089602	205091588	3	1.48412e-10	No	Yes	uc010prd.1;RBBP5;chr1:205080416-205090416;uc001hbu.1;RBBP5;chr1:205086131-205096131;uc001hbv.1;RBBP5;chr1:205086131-205096131;uc010pre.1;RBBP5;chr1:205086131-205096131;
chr1:205243293-205282940	39647	chr1	205243293	205247088	chr1	205278903	205282940	4	1.94761e-15	No	Yes	uc009xbj.1;NUAK2;chr1:205272860-205282860;
chr1:205247080-205292617	45537	chr1	205247080	205250960	chr1	205287698	205292617	6	3.04035e-21	No	Yes	uc001hce.2;NUAK2;chr1:205285883-205295883;
chr1:205251559-205279980	28421	chr1	205251559	205255482	chr1	205278148	205279980	4	4.9154e-16	No	Yes	uc009xbj.1;NUAK2;chr1:205272860-205282860;
chr1:205260810-205291814	31004	chr1	205260810	205263181	chr1	205288430	205291814	3	4.57857e-11	No	Yes	uc001hce.2;NUAK2;chr1:205285883-205295883;
chr1:205263909-205290179	26270	chr1	205263909	205269155	chr1	205285235	205290179	6	7.39005e-21	No	Yes	uc001hce.2;NUAK2;chr1:205285883-205295883;
chr1:205509847-205601706	91859	chr1	205509847	205512838	chr1	205597841	205601706	3	6.79193e-09	No	Yes	uc001hcy.1;ELK4;chr1:205597000-205607000;uc001hcz.2;ELK4;chr1:205597000-205607000;
chr1:205511568-205535363	23795	chr1	205511568	205515728	chr1	205533538	205535363	3	1.85335e-11	No	Yes	uc010prk.1;MFSD4;chr1:205533111-205543111;uc010prl.1;DKFZp761N1114;chr1:205533111-205543111;uc001hcv.3;MFSD4;chr1:205533111-205543111;
chr1:206649073-206683117	34044	chr1	206649073	206653860	chr1	206680345	206683117	4	1.90683e-13	No	Yes	uc001hec.1;RASSF5;chr1:206675878-206685878;uc001hed.2;RASSF5;chr1:206675878-206685878;uc001hee.2;RASSF5;chr1:206675878-206685878;
chr1:206653844-206761331	107487	chr1	206653844	206657262	chr1	206758314	206761331	3	3.75328e-11	No	Yes	uc001heg.1;RASSF5;chr1:206751600-206761600;
chr1:207028060-207037484	9424	chr1	207028060	207032921	chr1	207034567	207037484	4	2.01368e-17	No	Yes	uc010pry.1;IL20;chr1:207033698-207043698;uc001her.2;IL20;chr1:207034153-207044153;uc009xby.2;IL20;chr1:207034167-207044167;
chr1:207390953-207496715	105762	chr1	207390953	207394070	chr1	207493191	207496715	3	1.05844e-10	No	Yes	uc001hfp.3;CD55;chr1:207489816-207499816;uc001hfr.3;CD55;chr1:207489816-207499816;uc001hfq.3;CD55;chr1:207489816-207499816;uc010psf.1;DAF;chr1:207489816-207499816;uc009xcf.2;CD55;chr1:207489816-207499816;uc009xce.2;CD55;chr1:207489816-207499816;uc009xcg.2;DAF;chr1:207493966-207503966;
chr1:207412749-207492128	79379	chr1	207412749	207415307	chr1	207489202	207492128	3	4.88164e-11	No	Yes	uc001hfp.3;CD55;chr1:207489816-207499816;uc001hfr.3;CD55;chr1:207489816-207499816;uc001hfq.3;CD55;chr1:207489816-207499816;uc010psf.1;DAF;chr1:207489816-207499816;uc009xcf.2;CD55;chr1:207489816-207499816;uc009xce.2;CD55;chr1:207489816-207499816;
chr1:207430962-207498680	67718	chr1	207430962	207435215	chr1	207492855	207498680	7	1.93609e-24	No	Yes	uc001hfp.3;CD55;chr1:207489816-207499816;uc001hfr.3;CD55;chr1:207489816-207499816;uc001hfq.3;CD55;chr1:207489816-207499816;uc010psf.1;DAF;chr1:207489816-207499816;uc009xcf.2;CD55;chr1:207489816-207499816;uc009xce.2;CD55;chr1:207489816-207499816;uc009xcg.2;DAF;chr1:207493966-207503966;
chr1:209420639-209609877	189238	chr1	209420639	209424280	chr1	209607063	209609877	4	1.81139e-15	No	Yes	uc010psk.1;DM004461;chr1:209600477-209610477;uc009xcn.2;LOC642587;chr1:209597167-209607167;
chr1:209422487-209606190	183703	chr1	209422487	209426299	chr1	209601741	209606190	3	5.60548e-11	No	Yes	uc010psk.1;DM004461;chr1:209600477-209610477;uc009xcn.2;LOC642587;chr1:209597167-209607167;
chr1:209524634-209610404	85770	chr1	209524634	209532045	chr1	209599866	209610404	18	0	No	Yes	uc010psk.1;DM004461;chr1:209600477-209610477;uc009xcn.2;LOC642587;chr1:209597167-209607167;
chr1:209532175-209610156	77981	chr1	209532175	209545038	chr1	209598052	209610156	35	0	No	Yes	uc010psk.1;DM004461;chr1:209600477-209610477;uc009xcn.2;LOC642587;chr1:209597167-209607167;
chr1:209556562-209608152	51590	chr1	209556562	209561769	chr1	209603992	209608152	7	1.34127e-22	No	Yes	uc010psk.1;DM004461;chr1:209600477-209610477;uc009xcn.2;LOC642587;chr1:209597167-209607167;
chr1:209557688-209603196	45508	chr1	209557688	209559993	chr1	209600504	209603196	4	4.09597e-15	No	Yes	uc010psk.1;DM004461;chr1:209600477-209610477;uc009xcn.2;LOC642587;chr1:209597167-209607167;
chr1:209564284-209603813	39529	chr1	209564284	209567098	chr1	209600803	209603813	3	1.72674e-11	No	Yes	uc010psk.1;DM004461;chr1:209600477-209610477;uc009xcn.2;LOC642587;chr1:209597167-209607167;
chr1:209569453-209608097	38644	chr1	209569453	209572722	chr1	209605259	209608097	3	2.39893e-10	No	Yes	uc010psk.1;DM004461;chr1:209600477-209610477;uc009xcn.2;LOC642587;chr1:209597167-209607167;
chr1:210394665-210407618	12953	chr1	210394665	210397584	chr1	210404970	210407618	3	3.93738e-12	No	Yes	uc001hhx.3;C1orf133;chr1:210402466-210412466;uc001hhy.2;SERTAD4;chr1:210401194-210411194;uc009xcw.2;SERTAD4;chr1:210406129-210416129;
chr1:211855881-212209405	353524	chr1	211855881	211858845	chr1	212207068	212209405	3	2.1743e-13	No	Yes	uc001hiw.1;INTS7;chr1:212203884-212213884;uc009xdb.1;INTS7;chr1:212203884-212213884;uc001hix.1;DKFZp434B168;chr1:212203884-212213884;uc001hiy.1;INTS7;chr1:212203884-212213884;uc010pta.1;INTS7;chr1:212203884-212213884;uc009xdc.2;DTL;chr1:212203918-212213918;uc010ptb.1;DTL;chr1:212203918-212213918;uc001hiz.3;DTL;chr1:212203918-212213918;
chr1:214385146-214456775	71629	chr1	214385146	214391481	chr1	214450708	214456775	15	0	No	Yes	uc009xdj.2;SMYD2;chr1:214449564-214459564;uc010ptw.1;HSKM-B;chr1:214449564-214459564;uc010ptx.1;SMYD2;chr1:214449564-214459564;uc009xdl.1;HSKM-B;chr1:214449564-214459564;
chr1:214677645-214726744	49099	chr1	214677645	214681280	chr1	214723322	214726744	5	6.31018e-20	No	Yes	uc001hkk.1;PTPN14;chr1:214719642-214729642;uc010pty.1;PTPN14;chr1:214719642-214729642;uc001hkl.1;PTPN14;chr1:214719642-214729642;
chr1:215712013-215741822	29809	chr1	215712013	215714709	chr1	215738982	215741822	3	1.29032e-10	No	Yes	uc001hks.2;KCTD3;chr1:215735734-215745734;uc001hkt.2;KCTD3;chr1:215735734-215745734;uc010pub.1;KCTD3;chr1:215735734-215745734;
chr1:217792950-217805631	12681	chr1	217792950	217797254	chr1	217802215	217805631	4	1.07507e-13	No	Yes	uc001hlf.1;GPATCH2;chr1:217799409-217809409;uc001hlg.3;GPATCH2;chr1:217799409-217809409;uc009xdr.1;SPATA17;chr1:217799694-217809694;uc001hlh.1;SPATA17;chr1:217799694-217809694;uc001hli.2;SPATA17;chr1:217799694-217809694;
chr1:218431889-218460578	28689	chr1	218431889	218434244	chr1	218457298	218460578	3	1.77399e-11	No	Yes	uc001hlj.2;RRP15;chr1:218453628-218463628;
chr1:220905522-220921942	16420	chr1	220905522	220909256	chr1	220918149	220921942	5	5.48985e-21	No	Yes	uc001hmq.2;MOSC2;chr1:220916675-220926675;uc001hmr.2;MOSC2;chr1:220916675-220926675;uc009xdx.2;MOSC2;chr1:220916675-220926675;
chr1:220947345-220959292	11947	chr1	220947345	220950182	chr1	220956454	220959292	3	8.98417e-14	No	Yes	uc001hms.2;MOSC1;chr1:220955038-220965038;uc001hmt.2;MOSC1;chr1:220955038-220965038;
chr1:221649117-221916145	267028	chr1	221649117	221652436	chr1	221913208	221916145	3	1.0416e-12	No	Yes	uc001hmx.1;DUSP10;chr1:221905802-221915802;uc001hmy.1;DUSP10;chr1:221910461-221920461;uc001hmz.1;DUSP10;chr1:221910461-221920461;
chr1:223297874-223307406	9532	chr1	223297874	223300062	chr1	223305368	223307406	3	5.55341e-14	No	Yes	uc001hnv.1;TLR5;chr1:223303206-223313206;
chr1:223348196-223856683	508487	chr1	223348196	223351831	chr1	223853498	223856683	4	1.30774e-16	No	Yes	uc009xee.2;CAPN8;chr1:223848436-223858436;
chr1:223840282-223856291	16009	chr1	223840282	223843675	chr1	223851675	223856291	7	6.49853e-27	No	Yes	uc009xee.2;CAPN8;chr1:223848436-223858436;
chr1:224486987-224519020	32033	chr1	224486987	224489490	chr1	224515938	224519020	3	1.18999e-11	No	Yes	uc001hok.2;NVL;chr1:224512872-224522872;uc001hol.2;NVL;chr1:224512872-224522872;uc010pvd.1;NVL;chr1:224512872-224522872;uc010pve.1;NVL;chr1:224512872-224522872;uc010pvf.1;NVL;chr1:224512872-224522872;uc010pvg.1;NVL;chr1:224512872-224522872;
chr1:225759930-225840805	80875	chr1	225759930	225762084	chr1	225837914	225840805	3	1.25892e-11	No	Yes	uc001hpc.1;ENAH;chr1:225835845-225845845;uc001hpd.1;ENAH;chr1:225835845-225845845;
chr1:225812743-225842082	29339	chr1	225812743	225815583	chr1	225838779	225842082	3	1.90674e-10	No	Yes	uc001hpc.1;ENAH;chr1:225835845-225845845;uc001hpd.1;ENAH;chr1:225835845-225845845;
chr1:225825909-225842314	16405	chr1	225825909	225828696	chr1	225839618	225842314	3	8.61154e-11	No	Yes	uc001hpc.1;ENAH;chr1:225835845-225845845;uc001hpd.1;ENAH;chr1:225835845-225845845;
chr1:225907278-225963050	55772	chr1	225907278	225910791	chr1	225959597	225963050	3	2.043e-12	No	Yes	uc001hpj.1;BC045603;chr1:225960550-225970550;uc001hpf.3;DKFZp564M2223;chr1:225960514-225970514;uc001hph.2;SRP9;chr1:225960514-225970514;uc001hpg.2;SRP9;chr1:225960514-225970514;uc001hpi.3;DKFZp564M2223;chr1:225960514-225970514;
chr1:226318646-226374842	56196	chr1	226318646	226321534	chr1	226372342	226374842	4	1.954e-13	No	Yes	uc001hpy.2;ACBD3;chr1:226369423-226379423;
chr1:226349791-226375723	25932	chr1	226349791	226353592	chr1	226372559	226375723	4	2.39145e-15	No	Yes	uc001hpy.2;ACBD3;chr1:226369423-226379423;
chr1:226667236-226739144	71908	chr1	226667236	226670523	chr1	226736433	226739144	4	4.44369e-15	No	Yes	uc010pvn.1;C1orf95;chr1:226731500-226741500;
chr1:227948253-228136345	188092	chr1	227948253	227951244	chr1	228133555	228136345	5	6.04451e-19	No	Yes	uc001hri.2;WNT9A;chr1:228130676-228140676;
chr1:227951444-228135911	184467	chr1	227951444	227953989	chr1	228132939	228135911	4	2.61761e-15	No	Yes	uc001hri.2;WNT9A;chr1:228130676-228140676;
chr1:227973990-228136462	162472	chr1	227973990	227976500	chr1	228134426	228136462	3	2.64916e-11	No	Yes	uc001hri.2;WNT9A;chr1:228130676-228140676;
chr1:228185172-228298113	112941	chr1	228185172	228187867	chr1	228295198	228298113	3	3.05774e-11	No	Yes	uc001hrx.2;C1orf35;chr1:228286022-228296022;uc009xew.2;C1orf35;chr1:228286022-228296022;uc001hry.2;MRPL55;chr1:228291705-228301705;uc001hrz.3;MRPL55;chr1:228292013-228302013;uc009xex.2;MRPL55;chr1:228292013-228302013;uc001hsa.3;MRPL55;chr1:228292013-228302013;uc001hsb.3;MRPL55;chr1:228292013-228302013;uc001hsc.3;MRPL55;chr1:228292013-228302013;uc001hsd.3;MRPL55;chr1:228292013-228302013;uc001hse.3…
chr1:230865399-230880006	14607	chr1	230865399	230868342	chr1	230877911	230880006	3	2.66242e-14	No	Yes	uc001htz.1;CAPN9;chr1:230878129-230888129;uc001hua.1;CAPN9;chr1:230878129-230888129;uc009xfg.1;CAPN9;chr1:230878129-230888129;
chr1:231493980-231559718	65738	chr1	231493980	231495503	chr1	231557610	231559718	3	3.03737e-12	No	Yes	uc001huu.3;EGLN1;chr1:231551057-231561057;uc001huv.2;EGLN1;chr1:231555790-231565790;
chr1:234590830-234616059	25229	chr1	234590830	234594611	chr1	234612694	234616059	4	8.7041e-14	No	Yes	uc001hwd.2;TARBP1;chr1:234609849-234619849;
chr1:234632108-235101516	469408	chr1	234632108	234635489	chr1	235098438	235101516	3	9.08453e-10	No	Yes	uc001hwk.3;BC016972;chr1:235094746-235104746;
chr1:234633808-234860719	226911	chr1	234633808	234636799	chr1	234857936	234860719	3	5.97133e-10	No	Yes	uc001hwj.1;AK125357;chr1:234856147-234866147;
chr1:234706797-234747512	40715	chr1	234706797	234711174	chr1	234744575	234747512	3	2.30997e-08	No	Yes	uc009xfw.2;IRF2BP2;chr1:234738860-234748860;uc001hwg.2;IRF2BP2;chr1:234740271-234750271;uc001hwf.2;IRF2BP2;chr1:234740271-234750271;
chr1:234709853-234740472	30619	chr1	234709853	234713844	chr1	234735770	234740472	5	1.43076e-17	No	Yes	uc009xfw.2;IRF2BP2;chr1:234738860-234748860;uc001hwg.2;IRF2BP2;chr1:234740271-234750271;uc001hwf.2;IRF2BP2;chr1:234740271-234750271;
chr1:235005226-235099899	94673	chr1	235005226	235009370	chr1	235095897	235099899	4	5.57885e-12	No	Yes	uc001hwk.3;BC016972;chr1:235094746-235104746;
chr1:235009795-235095507	85712	chr1	235009795	235013822	chr1	235091825	235095507	4	1.99689e-11	No	Yes	uc001hwk.3;BC016972;chr1:235094746-235104746;
chr1:235009936-235102430	92494	chr1	235009936	235013952	chr1	235098359	235102430	9	3.78152e-27	No	Yes	uc001hwk.3;BC016972;chr1:235094746-235104746;
chr1:235010651-235098251	87600	chr1	235010651	235013170	chr1	235096554	235098251	3	1.94278e-09	No	Yes	uc001hwk.3;BC016972;chr1:235094746-235104746;
chr1:235034544-235098011	63467	chr1	235034544	235038187	chr1	235092666	235098011	6	3.12745e-19	No	Yes	uc001hwk.3;BC016972;chr1:235094746-235104746;
chr1:235055329-235099275	43946	chr1	235055329	235064384	chr1	235089506	235099275	19	0	No	Yes	uc001hwk.3;BC016972;chr1:235094746-235104746;
chr1:235421725-235495361	73636	chr1	235421725	235427975	chr1	235489691	235495361	7	7.70143e-23	No	Yes	uc001hwq.2;ARID4B;chr1:235486532-235496532;uc001hwr.2;ARID4B;chr1:235486532-235496532;uc001hws.3;ARID4B;chr1:235486532-235496532;uc001hwu.1;ARID4B;chr1:235486532-235496532;uc001hwv.2;GGPS1;chr1:235486752-235496752;uc001hww.2;GGPS1;chr1:235486868-235496868;uc001hwx.2;GGPS1;chr1:235486868-235496868;uc001hwy.2;GGPS1;chr1:235487330-235497330;
chr1:235431615-235493007	61392	chr1	235431615	235435518	chr1	235489944	235493007	4	2.79547e-14	No	Yes	uc001hwq.2;ARID4B;chr1:235486532-235496532;uc001hwr.2;ARID4B;chr1:235486532-235496532;uc001hws.3;ARID4B;chr1:235486532-235496532;uc001hwu.1;ARID4B;chr1:235486532-235496532;uc001hwv.2;GGPS1;chr1:235486752-235496752;uc001hww.2;GGPS1;chr1:235486868-235496868;uc001hwx.2;GGPS1;chr1:235486868-235496868;uc001hwy.2;GGPS1;chr1:235487330-235497330;
chr1:235442976-235493292	50316	chr1	235442976	235445019	chr1	235491368	235493292	3	1.64845e-11	No	Yes	uc001hwq.2;ARID4B;chr1:235486532-235496532;uc001hwr.2;ARID4B;chr1:235486532-235496532;uc001hws.3;ARID4B;chr1:235486532-235496532;uc001hwu.1;ARID4B;chr1:235486532-235496532;uc001hwv.2;GGPS1;chr1:235486752-235496752;uc001hww.2;GGPS1;chr1:235486868-235496868;uc001hwx.2;GGPS1;chr1:235486868-235496868;uc001hwy.2;GGPS1;chr1:235487330-235497330;
chr1:244767902-245000053	232151	chr1	244767902	244770775	chr1	244997230	245000053	3	5.07228e-10	No	Yes	uc001iar.2;FAM36A;chr1:244993638-245003638;uc001ias.2;FAM36A;chr1:244993638-245003638;uc001iat.2;FAM36A;chr1:244993638-245003638;
chr1:246853163-246888986	35823	chr1	246853163	246855096	chr1	246886538	246888986	3	1.71675e-11	No	Yes	uc001ibr.2;SCCPDH;chr1:246882377-246892377;
chr10:119687-183038	63351	chr10	119687	121775	chr10	180053	183038	3	4.12473e-11	No	Yes	uc001ifk.2;ZMYND11;chr10:175423-185423;uc010pzt.1;ZMYND11;chr10:175423-185423;uc010pzu.1;ZMYND11;chr10:175423-185423;uc010pzv.1;ZMYND11;chr10:175423-185423;uc010pzw.1;ZMYND11;chr10:175423-185423;uc001ifm.2;ZMYND11;chr10:176423-186423;
chr10:124260-183592	59332	chr10	124260	127839	chr10	178902	183592	6	5.98943e-20	No	Yes	uc001ifk.2;ZMYND11;chr10:175423-185423;uc010pzt.1;ZMYND11;chr10:175423-185423;uc010pzu.1;ZMYND11;chr10:175423-185423;uc010pzv.1;ZMYND11;chr10:175423-185423;uc010pzw.1;ZMYND11;chr10:175423-185423;uc001ifm.2;ZMYND11;chr10:176423-186423;
chr10:137397-182445	45048	chr10	137397	140427	chr10	180167	182445	3	2.26168e-10	No	Yes	uc001ifk.2;ZMYND11;chr10:175423-185423;uc010pzt.1;ZMYND11;chr10:175423-185423;uc010pzu.1;ZMYND11;chr10:175423-185423;uc010pzv.1;ZMYND11;chr10:175423-185423;uc010pzw.1;ZMYND11;chr10:175423-185423;uc001ifm.2;ZMYND11;chr10:176423-186423;
chr10:155678-182883	27205	chr10	155678	158681	chr10	179805	182883	3	4.24095e-10	No	Yes	uc001ifk.2;ZMYND11;chr10:175423-185423;uc010pzt.1;ZMYND11;chr10:175423-185423;uc010pzu.1;ZMYND11;chr10:175423-185423;uc010pzv.1;ZMYND11;chr10:175423-185423;uc010pzw.1;ZMYND11;chr10:175423-185423;uc001ifm.2;ZMYND11;chr10:176423-186423;
chr10:555810-736581	180771	chr10	555810	559181	chr10	734014	736581	3	8.89939e-11	No	Yes	uc001ifp.2;DIP2C;chr10:730608-740608;
chr10:667961-736425	68464	chr10	667961	671852	chr10	732081	736425	5	1.49374e-17	No	Yes	uc001ifp.2;DIP2C;chr10:730608-740608;
chr10:674481-737251	62770	chr10	674481	678808	chr10	734028	737251	4	2.46455e-14	No	Yes	uc001ifp.2;DIP2C;chr10:730608-740608;
chr10:721854-736400	14546	chr10	721854	725155	chr10	733736	736400	3	1.75391e-11	No	Yes	uc001ifp.2;DIP2C;chr10:730608-740608;
chr10:969504-1103813	134309	chr10	969504	972308	chr10	1100615	1103813	3	5.31804e-10	No	Yes	uc001igc.2;IDI1;chr10:1097644-1107644;uc001ige.2;WDR37;chr10:1097343-1107343;uc001igf.1;WDR37;chr10:1097775-1107775;uc009xhm.1;WDR37;chr10:1097775-1107775;uc009xhn.1;KIAA0982;chr10:1097775-1107775;
chr10:975582-1122267	146685	chr10	975582	978698	chr10	1119494	1122267	3	3.82506e-10	No	Yes	uc001igg.1;KIAA0982;chr10:1114843-1124843;
chr10:3234580-3829305	594725	chr10	3234580	3240674	chr10	3823650	3829305	7	4.60852e-18	No	Yes	uc010qaj.1;KLF6;chr10:3822473-3832473;uc001iha.2;KLF6;chr10:3822473-3832473;uc010qak.1;KLF6;chr10:3822473-3832473;uc010qal.1;KLF6;chr10:3822473-3832473;uc001ihb.2;KLF6;chr10:3822473-3832473;
chr10:3269276-3830369	561093	chr10	3269276	3271402	chr10	3825341	3830369	4	1.16081e-11	No	Yes	uc010qaj.1;KLF6;chr10:3822473-3832473;uc001iha.2;KLF6;chr10:3822473-3832473;uc010qak.1;KLF6;chr10:3822473-3832473;uc010qal.1;KLF6;chr10:3822473-3832473;uc001ihb.2;KLF6;chr10:3822473-3832473;
chr10:3277604-3826612	549008	chr10	3277604	3281819	chr10	3823240	3826612	4	4.10741e-13	No	Yes	uc010qaj.1;KLF6;chr10:3822473-3832473;uc001iha.2;KLF6;chr10:3822473-3832473;uc010qak.1;KLF6;chr10:3822473-3832473;uc010qal.1;KLF6;chr10:3822473-3832473;uc001ihb.2;KLF6;chr10:3822473-3832473;
chr10:3282023-3828905	546882	chr10	3282023	3284930	chr10	3825422	3828905	4	1.43656e-11	No	Yes	uc010qaj.1;KLF6;chr10:3822473-3832473;uc001iha.2;KLF6;chr10:3822473-3832473;uc010qak.1;KLF6;chr10:3822473-3832473;uc010qal.1;KLF6;chr10:3822473-3832473;uc001ihb.2;KLF6;chr10:3822473-3832473;
chr10:3331489-3827743	496254	chr10	3331489	3333553	chr10	3824781	3827743	3	1.0062e-08	No	Yes	uc010qaj.1;KLF6;chr10:3822473-3832473;uc001iha.2;KLF6;chr10:3822473-3832473;uc010qak.1;KLF6;chr10:3822473-3832473;uc010qal.1;KLF6;chr10:3822473-3832473;uc001ihb.2;KLF6;chr10:3822473-3832473;
chr10:3333596-3830019	496423	chr10	3333596	3335983	chr10	3827768	3830019	3	3.98213e-09	No	Yes	uc010qaj.1;KLF6;chr10:3822473-3832473;uc001iha.2;KLF6;chr10:3822473-3832473;uc010qak.1;KLF6;chr10:3822473-3832473;uc010qal.1;KLF6;chr10:3822473-3832473;uc001ihb.2;KLF6;chr10:3822473-3832473;
chr10:3441476-3829195	387719	chr10	3441476	3443583	chr10	3826270	3829195	3	1.33774e-09	No	Yes	uc010qaj.1;KLF6;chr10:3822473-3832473;uc001iha.2;KLF6;chr10:3822473-3832473;uc010qak.1;KLF6;chr10:3822473-3832473;uc010qal.1;KLF6;chr10:3822473-3832473;uc001ihb.2;KLF6;chr10:3822473-3832473;
chr10:3505060-3829080	324020	chr10	3505060	3516426	chr10	3824263	3829080	19	1.4013e-45	No	Yes	uc010qaj.1;KLF6;chr10:3822473-3832473;uc001iha.2;KLF6;chr10:3822473-3832473;uc010qak.1;KLF6;chr10:3822473-3832473;uc010qal.1;KLF6;chr10:3822473-3832473;uc001ihb.2;KLF6;chr10:3822473-3832473;
chr10:3577742-3829045	251303	chr10	3577742	3582663	chr10	3825905	3829045	5	2.71444e-13	No	Yes	uc010qaj.1;KLF6;chr10:3822473-3832473;uc001iha.2;KLF6;chr10:3822473-3832473;uc010qak.1;KLF6;chr10:3822473-3832473;uc010qal.1;KLF6;chr10:3822473-3832473;uc001ihb.2;KLF6;chr10:3822473-3832473;
chr10:4704371-4722125	17754	chr10	4704371	4707713	chr10	4716720	4722125	6	4.11713e-20	No	Yes	uc001ihe.3;LOC100216001;chr10:4715262-4725262;uc001ihf.3;LOC100216001;chr10:4715262-4725262;
chr10:4856908-4871321	14413	chr10	4856908	4859105	chr10	4868238	4871321	3	1.14132e-12	No	Yes	uc010qam.1;AKR1CL2;chr10:4863401-4873401;uc001ihh.1;AKR1CL2;chr10:4863401-4873401;uc009xhw.2;AKR1CL2;chr10:4863401-4873401;uc001ihi.2;AKR1E2;chr10:4863401-4873401;uc001ihj.2;AKR1E2;chr10:4863401-4873401;uc001ihk.2;AKR1E2;chr10:4863401-4873401;uc001ihl.1;AKR1CL2;chr10:4863401-4873401;
chr10:5587641-5710327	122686	chr10	5587641	5590232	chr10	5707987	5710327	3	2.53825e-07	No	Yes	uc001iig.2;ASB13;chr10:5703558-5713558;uc001iii.2;ASB13;chr10:5703558-5713558;uc001iih.2;ASB13;chr10:5703558-5713558;uc009xic.2;ASB13;chr10:5703558-5713558;
chr10:5587706-5703703	115997	chr10	5587706	5590617	chr10	5700904	5703703	3	4.9945e-08	No	Yes	uc001iig.2;ASB13;chr10:5703558-5713558;uc001iii.2;ASB13;chr10:5703558-5713558;uc001iih.2;ASB13;chr10:5703558-5713558;uc009xic.2;ASB13;chr10:5703558-5713558;
chr10:5989956-6133621	143665	chr10	5989956	5992990	chr10	6129342	6133621	4	2.10549e-15	No	Yes	uc001ijb.2;RBM17;chr10:6125948-6135948;uc010qav.1;RBM17;chr10:6126308-6136308;
chr10:5993851-6020858	27007	chr10	5993851	5996017	chr10	6018079	6020858	3	7.45564e-12	No	Yes	uc001iiv.2;IL15RA;chr10:6014537-6024537;uc010qau.1;IL15RA;chr10:6014537-6024537;uc001iiw.2;IL15RA;chr10:6015142-6025142;uc001iix.2;IL15RA;chr10:6015142-6025142;uc001iiy.2;IL15RA;chr10:6015142-6025142;
chr10:6168583-6246451	77868	chr10	6168583	6171186	chr10	6243382	6246451	4	6.41398e-13	No	Yes	uc001ije.2;PFKFB3;chr10:6239839-6249839;uc001ijf.2;PFKFB3;chr10:6239839-6249839;
chr10:7848319-7857011	8692	chr10	7848319	7852267	chr10	7853048	7857011	4	1.79778e-16	No	Yes	uc010qbd.1;TAF3;chr10:7855672-7865672;
chr10:7904653-8105344	200691	chr10	7904653	7926017	chr10	8083015	8105344	123	0	No	Yes	uc010qbe.1;FLJ45983;chr10:8090447-8100447;uc001ijx.1;FLJ45983;chr10:8090447-8100447;uc010qbf.1;FLJ45983;chr10:8090447-8100447;uc010qbg.1;FLJ45983;chr10:8090447-8100447;uc001ijy.1;BC036297;chr10:8090412-8100412;uc001ijz.2;GATA3;chr10:8091666-8101666;uc001ika.2;GATA3;chr10:8091666-8101666;
chr10:7936084-8092691	156607	chr10	7936084	7937991	chr10	8089012	8092691	4	3.3142e-13	No	Yes	uc010qbe.1;FLJ45983;chr10:8090447-8100447;uc001ijx.1;FLJ45983;chr10:8090447-8100447;uc010qbf.1;FLJ45983;chr10:8090447-8100447;uc010qbg.1;FLJ45983;chr10:8090447-8100447;uc001ijy.1;BC036297;chr10:8090412-8100412;uc001ijz.2;GATA3;chr10:8091666-8101666;uc001ika.2;GATA3;chr10:8091666-8101666;
chr10:7980835-8092598	111763	chr10	7980835	7985414	chr10	8088346	8092598	5	2.77591e-14	No	Yes	uc010qbe.1;FLJ45983;chr10:8090447-8100447;uc001ijx.1;FLJ45983;chr10:8090447-8100447;uc010qbf.1;FLJ45983;chr10:8090447-8100447;uc010qbg.1;FLJ45983;chr10:8090447-8100447;uc001ijy.1;BC036297;chr10:8090412-8100412;uc001ijz.2;GATA3;chr10:8091666-8101666;uc001ika.2;GATA3;chr10:8091666-8101666;
chr10:7983601-8097946	114345	chr10	7983601	7988952	chr10	8094266	8097946	8	3.78124e-19	No	Yes	uc010qbe.1;FLJ45983;chr10:8090447-8100447;uc001ijx.1;FLJ45983;chr10:8090447-8100447;uc010qbf.1;FLJ45983;chr10:8090447-8100447;uc010qbg.1;FLJ45983;chr10:8090447-8100447;uc001ijy.1;BC036297;chr10:8090412-8100412;uc001ijz.2;GATA3;chr10:8091666-8101666;uc001ika.2;GATA3;chr10:8091666-8101666;
chr10:7990366-8097801	107435	chr10	7990366	7994841	chr10	8094228	8097801	6	1.78191e-15	No	Yes	uc010qbe.1;FLJ45983;chr10:8090447-8100447;uc001ijx.1;FLJ45983;chr10:8090447-8100447;uc010qbf.1;FLJ45983;chr10:8090447-8100447;uc010qbg.1;FLJ45983;chr10:8090447-8100447;uc001ijy.1;BC036297;chr10:8090412-8100412;uc001ijz.2;GATA3;chr10:8091666-8101666;uc001ika.2;GATA3;chr10:8091666-8101666;
chr10:8067208-8097101	29893	chr10	8067208	8071187	chr10	8093092	8097101	5	3.18435e-13	No	Yes	uc010qbe.1;FLJ45983;chr10:8090447-8100447;uc001ijx.1;FLJ45983;chr10:8090447-8100447;uc010qbf.1;FLJ45983;chr10:8090447-8100447;uc010qbg.1;FLJ45983;chr10:8090447-8100447;uc001ijy.1;BC036297;chr10:8090412-8100412;uc001ijz.2;GATA3;chr10:8091666-8101666;uc001ika.2;GATA3;chr10:8091666-8101666;
chr10:13619036-13627219	8183	chr10	13619036	13622344	chr10	13624392	13627219	3	3.87657e-14	No	Yes	uc001imp.2;PRPF18;chr10:13623938-13633938;uc001imq.2;BC002572;chr10:13624005-13634005;
chr10:17394296-17431553	37257	chr10	17394296	17397034	chr10	17428561	17431553	4	1.04976e-15	No	Yes	uc001ipe.2;BC029655;chr10:17423934-17433934;uc001ipf.1;AK127982;chr10:17423934-17433934;
chr10:17486315-17660699	174384	chr10	17486315	17488130	chr10	17658619	17660699	3	1.10617e-10	No	Yes	uc001ipg.2;PTPLA;chr10:17654373-17664373;uc001iph.1;PTPLA;chr10:17654373-17664373;uc001ipi.2;PTPLA;chr10:17654373-17664373;
chr10:21370468-21465688	95220	chr10	21370468	21376107	chr10	21463024	21465688	5	3.61269e-17	No	Yes	uc001iqk.2;NEBL;chr10:21458116-21468116;
chr10:21559845-21807425	247580	chr10	21559845	21561689	chr10	21804877	21807425	3	3.33913e-13	No	Yes	uc001iqp.1;AK055656;chr10:21798939-21808939;uc010qcs.1;DLN-1;chr10:21802121-21812121;
chr10:21719925-21824712	104787	chr10	21719925	21723047	chr10	21821739	21824712	3	6.16553e-11	No	Yes	uc001iqr.1;MLLT10;chr10:21818101-21828101;uc001iqq.1;MLLT10;chr10:21818101-21828101;uc001iqs.2;MLLT10;chr10:21818101-21828101;uc001iqt.2;MLLT10;chr10:21818101-21828101;uc001iqu.1;MLLT10;chr10:21818394-21828394;uc001iqv.2;AF10/CALM;chr10:21818394-21828394;uc009xke.1;AF10/CALM;chr10:21818573-21828573;uc001iqw.1;MLLT10;chr10:21818573-21828573;uc001iqx.1;AF10/CALM;chr10:21818573-21828573;uc009xkf.1;A…
chr10:22281561-22612348	330787	chr10	22281561	22284117	chr10	22608106	22612348	5	2.10857e-17	No	Yes	uc001ire.2;COMMD3;chr10:22600298-22610298;uc001irf.2;COMMD3;chr10:22600298-22610298;uc001irg.2;COMMD3;chr10:22600298-22610298;uc009xkg.2;BMI1;chr10:22600298-22610298;uc001irh.2;BMI1;chr10:22605005-22615005;
chr10:22282739-22605945	323206	chr10	22282739	22285751	chr10	22603796	22605945	3	4.96621e-11	No	Yes	uc001ire.2;COMMD3;chr10:22600298-22610298;uc001irf.2;COMMD3;chr10:22600298-22610298;uc001irg.2;COMMD3;chr10:22600298-22610298;uc009xkg.2;BMI1;chr10:22600298-22610298;uc001irh.2;BMI1;chr10:22605005-22615005;
chr10:22540922-22615033	74111	chr10	22540922	22542906	chr10	22612759	22615033	3	4.73068e-10	No	Yes	uc001irh.2;BMI1;chr10:22605005-22615005;
chr10:23715110-23729994	14884	chr10	23715110	23718111	chr10	23726420	23729994	4	2.0501e-16	No	Yes	uc001irr.1;OTUD1;chr10:23723197-23733197;
chr10:24932502-25014287	81785	chr10	24932502	24935328	chr10	25011023	25014287	3	3.28732e-11	No	Yes	uc001isb.2;ARHGAP21;chr10:25007597-25017597;uc009xkl.1;ARHGAP21;chr10:25007169-25017169;uc001isc.1;ARHGAP21;chr10:25006208-25016208;uc001isd.1;ARHGAP21;chr10:25006208-25016208;
chr10:27074239-27151224	76985	chr10	27074239	27077172	chr10	27148340	27151224	5	1.71975e-20	No	Yes	uc001isx.2;ABI1;chr10:27144959-27154959;uc001ite.2;ABI1;chr10:27144959-27154959;uc010qdh.1;ABI1;chr10:27144959-27154959;uc010qdi.1;hNap1BP;chr10:27144959-27154959;uc001isy.2;ABI1;chr10:27144959-27154959;uc001ita.2;ABI1;chr10:27144959-27154959;uc001isz.2;ABI1;chr10:27144959-27154959;uc001itb.2;ABI1;chr10:27144959-27154959;uc001itc.2;ABI1;chr10:27144959-27154959;uc010qdj.1;ABI1;chr10:27144959-27154…
chr10:28538446-28593319	54873	chr10	28538446	28540994	chr10	28591436	28593319	3	2.00457e-12	No	Yes	uc009xla.2;MPP7;chr10:28586995-28596995;uc010qdv.1;MPP7;chr10:28586995-28596995;
chr10:28542577-28593089	50512	chr10	28542577	28545073	chr10	28590628	28593089	3	5.11989e-12	No	Yes	uc009xla.2;MPP7;chr10:28586995-28596995;uc010qdv.1;MPP7;chr10:28586995-28596995;
chr10:28708847-28822833	113986	chr10	28708847	28711433	chr10	28820042	28822833	3	1.06788e-11	No	Yes	uc001iuc.2;BC043365;chr10:28816460-28826460;uc001iud.2;WAC;chr10:28816426-28826426;uc001iue.2;WAC;chr10:28816426-28826426;uc009xlb.2;WAC;chr10:28817423-28827423;uc001iuf.2;WAC;chr10:28817423-28827423;uc001iug.2;WAC;chr10:28817423-28827423;uc001iuh.2;WAC;chr10:28817434-28827434;
chr10:28719597-28826389	106792	chr10	28719597	28722258	chr10	28824199	28826389	3	4.29539e-13	No	Yes	uc001iuc.2;BC043365;chr10:28816460-28826460;uc001iud.2;WAC;chr10:28816426-28826426;uc001iue.2;WAC;chr10:28816426-28826426;uc009xlb.2;WAC;chr10:28817423-28827423;uc001iuf.2;WAC;chr10:28817423-28827423;uc001iug.2;WAC;chr10:28817423-28827423;uc001iuh.2;WAC;chr10:28817434-28827434;
chr10:29906505-29921095	14590	chr10	29906505	29914470	chr10	29913326	29921095	18	0	No	Yes	uc001iut.1;SVIL;chr10:29918901-29928901;uc001iuv.1;BC057241;chr10:29918882-29928882;
chr10:29906818-30026089	119271	chr10	29906818	29909256	chr10	30023492	30026089	4	1.15485e-13	No	Yes	uc001iuu.1;SVIL;chr10:30019730-30029730;uc009xld.1;SVIL;chr10:30020864-30030864;
chr10:32150344-32218539	68195	chr10	32150344	32152634	chr10	32214201	32218539	3	5.00521e-11	No	Yes	uc001ivz.1;ARHGAP12;chr10:32212770-32222770;uc009xls.2;ARHGAP12;chr10:32212770-32222770;uc001iwb.1;ARHGAP12;chr10:32212770-32222770;uc001iwc.1;ARHGAP12;chr10:32212770-32222770;uc009xlq.1;ARHGAP12;chr10:32212770-32222770;uc001iwd.1;ARHGAP12;chr10:32212770-32222770;uc009xlr.1;ARHGAP12;chr10:32212770-32222770;
chr10:32185213-32214454	29241	chr10	32185213	32188208	chr10	32210757	32214454	3	8.98875e-14	No	Yes	uc001ivz.1;ARHGAP12;chr10:32212770-32222770;uc009xls.2;ARHGAP12;chr10:32212770-32222770;uc001iwb.1;ARHGAP12;chr10:32212770-32222770;uc001iwc.1;ARHGAP12;chr10:32212770-32222770;uc009xlq.1;ARHGAP12;chr10:32212770-32222770;uc001iwd.1;ARHGAP12;chr10:32212770-32222770;uc009xlr.1;ARHGAP12;chr10:32212770-32222770;
chr10:32497827-32638081	140254	chr10	32497827	32502998	chr10	32634513	32638081	8	1.1342e-27	No	Yes	uc001iwg.1;EPC1;chr10:32631113-32641113;uc001iwh.1;EPC1;chr10:32631113-32641113;
chr10:32537606-32637334	99728	chr10	32537606	32540342	chr10	32635203	32637334	3	3.29798e-11	No	Yes	uc001iwg.1;EPC1;chr10:32631113-32641113;uc001iwh.1;EPC1;chr10:32631113-32641113;
chr10:33480413-33625620	145207	chr10	33480413	33484936	chr10	33622539	33625620	7	1.8862e-24	No	Yes	uc001iwv.3;NRP1;chr10:33618768-33628768;uc009xlz.2;NRP1;chr10:33618768-33628768;uc001iww.3;NRP1;chr10:33618768-33628768;uc001iwx.3;NRP1;chr10:33618833-33628833;uc001iwy.3;NRP1;chr10:33618833-33628833;uc001iwz.2;NRP1;chr10:33618833-33628833;uc001ixa.2;NRP1;chr10:33618833-33628833;uc001ixb.1;NRP1;chr10:33618768-33628768;uc001ixc.1;NRP1;chr10:33619006-33629006;
chr10:33578170-33626168	47998	chr10	33578170	33582232	chr10	33622893	33626168	4	5.47306e-12	No	Yes	uc001iwv.3;NRP1;chr10:33618768-33628768;uc009xlz.2;NRP1;chr10:33618768-33628768;uc001iww.3;NRP1;chr10:33618768-33628768;uc001iwx.3;NRP1;chr10:33618833-33628833;uc001iwy.3;NRP1;chr10:33618833-33628833;uc001iwz.2;NRP1;chr10:33618833-33628833;uc001ixa.2;NRP1;chr10:33618833-33628833;uc001ixb.1;NRP1;chr10:33618768-33628768;uc001ixc.1;NRP1;chr10:33619006-33629006;
chr10:35009937-35105995	96058	chr10	35009937	35013314	chr10	35103708	35105995	3	8.45125e-12	No	Yes	uc010qej.1;PARD3;chr10:35098923-35108923;uc010qek.1;PARD3;chr10:35098923-35108923;uc010qel.1;PARD3;chr10:35098923-35108923;uc010qem.1;PARD3;chr10:35098923-35108923;uc010qen.1;PARD3;chr10:35098923-35108923;uc010qeo.1;PARD3;chr10:35098923-35108923;uc010qep.1;PARD3;chr10:35098923-35108923;uc010qeq.1;PARD3;chr10:35098923-35108923;uc001ixq.1;PARD3;chr10:35098923-35108923;uc001ixr.1;PARD3;chr10:3509892…
chr10:35087041-35106020	18979	chr10	35087041	35089502	chr10	35103466	35106020	3	3.71119e-13	No	Yes	uc010qej.1;PARD3;chr10:35098923-35108923;uc010qek.1;PARD3;chr10:35098923-35108923;uc010qel.1;PARD3;chr10:35098923-35108923;uc010qem.1;PARD3;chr10:35098923-35108923;uc010qen.1;PARD3;chr10:35098923-35108923;uc010qeo.1;PARD3;chr10:35098923-35108923;uc010qep.1;PARD3;chr10:35098923-35108923;uc010qeq.1;PARD3;chr10:35098923-35108923;uc001ixq.1;PARD3;chr10:35098923-35108923;uc001ixr.1;PARD3;chr10:3509892…
chr10:35917501-35931640	14139	chr10	35917501	35921669	chr10	35928794	35931640	3	3.50057e-11	No	Yes	uc001iyz.1;FZD8;chr10:35925362-35935362;
chr10:38063395-38148100	84705	chr10	38063395	38067055	chr10	38144892	38148100	3	6.71519e-11	No	Yes	uc009xmc.2;ZNF248;chr10:38142012-38152012;uc001izb.2;ZNF248;chr10:38141486-38151486;uc001izd.1;ZNF248;chr10:38141486-38151486;uc001izc.2;ZNF248;chr10:38141486-38151486;uc010qeu.1;ZNF248;chr10:38142012-38152012;
chr10:38123782-38149505	25723	chr10	38123782	38128970	chr10	38145175	38149505	4	2.56904e-14	No	Yes	uc009xmc.2;ZNF248;chr10:38142012-38152012;uc001izb.2;ZNF248;chr10:38141486-38151486;uc001izd.1;ZNF248;chr10:38141486-38151486;uc001izc.2;ZNF248;chr10:38141486-38151486;uc010qeu.1;ZNF248;chr10:38142012-38152012;
chr10:43360364-43575400	215036	chr10	43360364	43363685	chr10	43571830	43575400	3	3.76966e-12	No	Yes	uc001jak.1;RET;chr10:43567516-43577516;uc001jal.2;RET;chr10:43567516-43577516;
chr10:43533868-43574676	40808	chr10	43533868	43538087	chr10	43571876	43574676	3	9.94396e-12	No	Yes	uc001jak.1;RET;chr10:43567516-43577516;uc001jal.2;RET;chr10:43567516-43577516;
chr10:43538130-43575204	37074	chr10	43538130	43541758	chr10	43570526	43575204	4	2.3419e-14	No	Yes	uc001jak.1;RET;chr10:43567516-43577516;uc001jal.2;RET;chr10:43567516-43577516;
chr10:43748329-43762104	13775	chr10	43748329	43751092	chr10	43758387	43762104	3	2.70886e-13	No	Yes	uc001jap.1;RASGEF1A;chr10:43757367-43767367;
chr10:43848751-43873618	24867	chr10	43848751	43853953	chr10	43869065	43873618	8	4.32331e-28	No	Yes	uc001jaq.1;FXYD4;chr10:43862091-43872091;
chr10:43849709-43893145	43436	chr10	43849709	43851969	chr10	43889837	43893145	4	1.1592e-12	No	Yes	uc009xmh.1;HNRNPF;chr10:43887279-43897279;uc001jar.2;HNRNPF;chr10:43887794-43897794;
chr10:43855373-43875446	20073	chr10	43855373	43860700	chr10	43866814	43875446	19	0	No	Yes	uc001jaq.1;FXYD4;chr10:43862091-43872091;
chr10:43856272-43905301	49029	chr10	43856272	43860710	chr10	43899954	43905301	8	1.83486e-20	No	Yes	uc001jas.2;HNRNPF;chr10:43898299-43908299;uc001jat.2;HNRNPF;chr10:43899332-43909332;uc001jav.2;HNRNPF;chr10:43899656-43909656;uc001jau.2;HNRNPF;chr10:43899696-43909696;
chr10:45428329-45455678	27349	chr10	45428329	45431725	chr10	45453082	45455678	3	1.57949e-11	No	Yes	uc001jbk.1;AK056518;chr10:45450137-45460137;uc001jbl.2;CR614419;chr10:45450137-45460137;uc001jbo.2;RASSF4;chr10:45450218-45460218;uc001jbp.2;DKFZp667E1116;chr10:45450218-45460218;uc009xmn.2;RASSF4;chr10:45450218-45460218;uc001jbq.2;RASSF4;chr10:45450218-45460218;
chr10:45438306-45455463	17157	chr10	45438306	45442346	chr10	45451972	45455463	4	8.59897e-16	No	Yes	uc001jbk.1;AK056518;chr10:45450137-45460137;uc001jbl.2;CR614419;chr10:45450137-45460137;uc001jbo.2;RASSF4;chr10:45450218-45460218;uc001jbp.2;DKFZp667E1116;chr10:45450218-45460218;uc009xmn.2;RASSF4;chr10:45450218-45460218;uc001jbq.2;RASSF4;chr10:45450218-45460218;
chr10:51497870-51546015	48145	chr10	51497870	51501630	chr10	51543327	51546015	3	6.70107e-15	No	Yes	uc001jiq.2;MSMB;chr10:51544552-51554552;uc001jir.2;MSMB;chr10:51544552-51554552;
chr10:52191418-52384353	192935	chr10	52191418	52195182	chr10	52381701	52384353	3	4.10422e-11	No	Yes	uc001jje.2;SGMS1;chr10:52378737-52388737;uc010qhk.1;SGMS1;chr10:52379923-52389923;uc009xot.1;SMS1;chr10:52378737-52388737;uc009xou.1;SGMS1;chr10:52377747-52387747;uc001jjf.1;AK022382;chr10:52383909-52393909;
chr10:52229968-52385931	155963	chr10	52229968	52233210	chr10	52382214	52385931	3	3.26858e-09	No	Yes	uc001jje.2;SGMS1;chr10:52378737-52388737;uc010qhk.1;SGMS1;chr10:52379923-52389923;uc009xot.1;SMS1;chr10:52378737-52388737;uc009xou.1;SGMS1;chr10:52377747-52387747;uc001jjf.1;AK022382;chr10:52383909-52393909;
chr10:52272048-52384651	112603	chr10	52272048	52276086	chr10	52381938	52384651	3	4.92336e-10	No	Yes	uc001jje.2;SGMS1;chr10:52378737-52388737;uc010qhk.1;SGMS1;chr10:52379923-52389923;uc009xot.1;SMS1;chr10:52378737-52388737;uc009xou.1;SGMS1;chr10:52377747-52387747;uc001jjf.1;AK022382;chr10:52383909-52393909;
chr10:60057924-60146615	88691	chr10	60057924	60062801	chr10	60142935	60146615	4	8.49532e-16	No	Yes	uc001jkf.2;TFAM;chr10:60140175-60150175;uc001jkg.2;TFAM;chr10:60140175-60150175;uc001jkh.2;TFAM;chr10:60140175-60150175;
chr10:61597281-61666879	69598	chr10	61597281	61599601	chr10	61664080	61666879	3	7.09664e-11	No	Yes	uc001jks.3;CCDC6;chr10:61661818-61671818;
chr10:61618604-61668725	50121	chr10	61618604	61622220	chr10	61664749	61668725	4	3.12856e-14	No	Yes	uc001jks.3;CCDC6;chr10:61661818-61671818;
chr10:61623049-61668318	45269	chr10	61623049	61625625	chr10	61665544	61668318	6	1.59855e-22	No	Yes	uc001jks.3;CCDC6;chr10:61661818-61671818;
chr10:61702957-61729124	26167	chr10	61702957	61706196	chr10	61723593	61729124	6	7.75804e-23	No	Yes	uc001jku.2;C10orf40;chr10:61715671-61725671;
chr10:61873064-61932259	59195	chr10	61873064	61877265	chr10	61928617	61932259	5	6.93421e-19	No	Yes	uc001jkx.2;ANK3;chr10:61927161-61937161;
chr10:62607246-62705399	98153	chr10	62607246	62611365	chr10	62702600	62705399	3	1.39386e-10	No	Yes	uc001jli.2;RHOBTB1;chr10:62699033-62709033;uc001jlh.2;RHOBTB1;chr10:62699033-62709033;uc009xpe.1;RHOBTB1;chr10:62696612-62706612;
chr10:62658639-62704977	46338	chr10	62658639	62662010	chr10	62702630	62704977	3	2.33711e-11	No	Yes	uc001jli.2;RHOBTB1;chr10:62699033-62709033;uc001jlh.2;RHOBTB1;chr10:62699033-62709033;uc009xpe.1;RHOBTB1;chr10:62696612-62706612;
chr10:62688194-62705944	17750	chr10	62688194	62691244	chr10	62702188	62705944	5	3.50255e-19	No	Yes	uc001jli.2;RHOBTB1;chr10:62699033-62709033;uc001jlh.2;RHOBTB1;chr10:62699033-62709033;uc009xpe.1;RHOBTB1;chr10:62696612-62706612;
chr10:63594118-63663774	69656	chr10	63594118	63597697	chr10	63661366	63663774	4	2.80116e-13	No	Yes	uc010qil.1;ARID5B;chr10:63656442-63666442;uc001jlt.1;ARID5B;chr10:63656442-63666442;
chr10:69845252-70093717	248465	chr10	69845252	69848907	chr10	70091707	70093717	3	7.09343e-09	No	Yes	uc001jns.1;PBLD;chr10:70087684-70097684;uc001jnt.1;PBLD;chr10:70087684-70097684;uc001jnu.1;PBLD;chr10:70087684-70097684;uc001jnw.3;HNRNPH3;chr10:70086767-70096767;uc001jnx.3;HNRNPH3;chr10:70086767-70096767;uc009xpu.2;HNRPH3;chr10:70086767-70096767;uc010qiv.1;DKFZp586F0222;chr10:70086767-70096767;uc001jny.3;HNRNPH3;chr10:70092372-70102372;
chr10:70556845-70661740	104895	chr10	70556845	70561074	chr10	70658754	70661740	5	1.02031e-18	No	Yes	uc001jot.2;DDX50;chr10:70656033-70666033;uc010qjc.1;DKFZp761E0323;chr10:70656033-70666033;uc001jou.2;DDX50;chr10:70656033-70666033;
chr10:71185795-71213141	27346	chr10	71185795	71188672	chr10	71208432	71213141	6	1.45653e-22	No	Yes	uc001jpo.1;TSPAN15;chr10:71206225-71216225;
chr10:71196594-71215059	18465	chr10	71196594	71201950	chr10	71209262	71215059	9	7.25208e-29	No	Yes	uc001jpo.1;TSPAN15;chr10:71206225-71216225;
chr10:71834907-71906787	71880	chr10	71834907	71837899	chr10	71903551	71906787	3	6.65855e-11	No	Yes	uc001jqq.2;TYSND1;chr10:71901432-71911432;uc001jqr.2;TYSND1;chr10:71901496-71911496;uc001jqs.2;TYSND1;chr10:71901496-71911496;uc001jqt.2;TYSND1;chr10:71901496-71911496;
chr10:72476187-72498961	22774	chr10	72476187	72479576	chr10	72495990	72498961	3	2.67015e-14	No	Yes	uc001jri.1;ADAMTS14;chr10:72488713-72498713;
chr10:72533534-72576639	43105	chr10	72533534	72536179	chr10	72574794	72576639	3	7.32249e-11	No	Yes	uc001jrl.2;KIAA1252;chr10:72570703-72580703;uc001jrm.2;SGPL1;chr10:72570703-72580703;
chr10:72833140-72973873	140733	chr10	72833140	72835807	chr10	72969533	72973873	4	3.47503e-15	No	Yes	uc001jro.2;UNC5B;chr10:72967297-72977297;uc001jrp.2;UNC5B;chr10:72967297-72977297;
chr10:75646021-75668556	22535	chr10	75646021	75649145	chr10	75665572	75668556	5	1.01921e-17	No	Yes	uc001jwa.2;PLAU;chr10:75665861-75675861;uc010qkw.1;PLAU;chr10:75665861-75675861;uc010qkx.1;PLAU;chr10:75665861-75675861;uc001jwb.2;PLAU;chr10:75665917-75675917;uc001jwc.2;PLAU;chr10:75665917-75675917;uc009xrq.1;PLAU;chr10:75666282-75676282;
chr10:75646564-75675746	29182	chr10	75646564	75650032	chr10	75671314	75675746	5	1.54911e-18	No	Yes	uc001jwa.2;PLAU;chr10:75665861-75675861;uc010qkw.1;PLAU;chr10:75665861-75675861;uc010qkx.1;PLAU;chr10:75665861-75675861;uc001jwb.2;PLAU;chr10:75665917-75675917;uc001jwc.2;PLAU;chr10:75665917-75675917;uc009xrq.1;PLAU;chr10:75666282-75676282;
chr10:76496572-76588008	91436	chr10	76496572	76501763	chr10	76583856	76588008	4	2.64025e-13	No	Yes	uc001jwm.1;MYST4;chr10:76581378-76591378;uc001jwn.1;MYST4;chr10:76581378-76591378;
chr10:77007026-77170221	163195	chr10	77007026	77010379	chr10	77167965	77170221	3	5.47051e-11	No	Yes	uc010qlg.1;C10orf41;chr10:77158513-77168513;
chr10:77047552-77055696	8144	chr10	77047552	77049803	chr10	77052328	77055696	4	5.36933e-18	No	Yes	uc001jxd.1;AK023445;chr10:77051147-77061147;
chr10:80685603-80832643	147040	chr10	80685603	80689431	chr10	80826025	80832643	7	1.98851e-21	No	Yes	uc001jzz.2;LOC283050;chr10:80822205-80832205;uc001jzx.2;LOC283050;chr10:80822205-80832205;uc001jzy.2;LOC283050;chr10:80822205-80832205;uc001kab.1;LOC283050;chr10:80823536-80833536;uc001kac.2;LOC283050;chr10:80821911-80831911;uc001kaf.2;ZMIZ1;chr10:80823791-80833791;
chr10:80732211-81002081	269870	chr10	80732211	80737763	chr10	80997623	81002081	7	1.40161e-17	No	Yes	uc001kag.2;ZMIZ1;chr10:80998424-81008424;
chr10:80962853-81005344	42491	chr10	80962853	80968310	chr10	80998625	81005344	8	9.07612e-25	No	Yes	uc001kag.2;ZMIZ1;chr10:80998424-81008424;
chr10:80973865-81000836	26971	chr10	80973865	80976385	chr10	80997920	81000836	3	2.14249e-11	No	Yes	uc001kag.2;ZMIZ1;chr10:80998424-81008424;
chr10:81020054-81109462	89408	chr10	81020054	81022317	chr10	81105821	81109462	4	1.86583e-13	No	Yes	uc001kai.2;PPIF;chr10:81102219-81112219;uc001kaj.2;PPIF;chr10:81102219-81112219;
chr10:82157348-82170457	13109	chr10	82157348	82161833	chr10	82166299	82170457	6	1.05129e-23	No	Yes	uc001kcc.3;C10orf58;chr10:82163241-82173241;uc001kcd.3;C10orf58;chr10:82163241-82173241;uc001kce.3;C10orf58;chr10:82168590-82178590;
chr10:88249143-88283249	34106	chr10	88249143	88252006	chr10	88280017	88283249	3	1.42692e-11	No	Yes	uc001kdn.2;WAPAL;chr10:88276496-88286496;uc001kdo.2;WAPAL;chr10:88276541-88286541;uc009xsw.2;WAPAL;chr10:88276541-88286541;uc010qmh.1;hWAPL;chr10:88276157-88286157;uc010qmi.1;hWAPL;chr10:88276525-88286525;uc010qmj.1;hWAPL;chr10:88276541-88286541;
chr10:88360508-88517342	156834	chr10	88360508	88364043	chr10	88514619	88517342	3	3.83875e-11	No	Yes	uc001kdy.2;BMPR1A;chr10:88511395-88521395;
chr10:88832473-88855588	23115	chr10	88832473	88836302	chr10	88853087	88855588	3	1.35891e-11	No	Yes	uc001keg.2;GLUD1;chr10:88848844-88858844;uc010qmp.1;GLUD1;chr10:88848844-88858844;uc001keh.2;GLUD1;chr10:88849623-88859623;uc001kei.3;FAM35A;chr10:88849952-88859952;
chr10:93144864-93170332	25468	chr10	93144864	93149225	chr10	93168067	93170332	4	2.04542e-14	No	Yes	uc001khk.2;HECTD2;chr10:93165095-93175095;uc001khl.2;HECTD2;chr10:93165095-93175095;uc010qnm.1;HECTD2;chr10:93165095-93175095;uc001khm.2;HECTD2;chr10:93165095-93175095;
chr10:93312317-93393840	81523	chr10	93312317	93316991	chr10	93389052	93393840	6	1.14852e-21	No	Yes	uc001kho.2;PPP1R3C;chr10:93387858-93397858;
chr10:93317213-93394572	77359	chr10	93317213	93320903	chr10	93391428	93394572	3	1.20285e-11	No	Yes	uc001kho.2;PPP1R3C;chr10:93387858-93397858;
chr10:93381705-93393764	12059	chr10	93381705	93385054	chr10	93391118	93393764	3	3.95737e-12	No	Yes	uc001kho.2;PPP1R3C;chr10:93387858-93397858;
chr10:93614162-93669898	55736	chr10	93614162	93618844	chr10	93665792	93669898	8	1.0713e-30	No	Yes	uc001khq.3;FGFBP3;chr10:93664258-93674258;
chr10:93638890-93670219	31329	chr10	93638890	93643512	chr10	93665882	93670219	9	1.09802e-33	No	Yes	uc001khq.3;FGFBP3;chr10:93664258-93674258;
chr10:93645639-93668609	22970	chr10	93645639	93650363	chr10	93664527	93668609	7	8.49629e-28	No	Yes	uc001khq.3;FGFBP3;chr10:93664258-93674258;
chr10:94286301-94353935	67634	chr10	94286301	94289329	chr10	94351494	94353935	3	5.61651e-12	No	Yes	uc001kic.2;KIF11;chr10:94347824-94357824;uc010qnq.1;KIF11;chr10:94347903-94357903;
chr10:95149071-95243530	94459	chr10	95149071	95152312	chr10	95239156	95243530	4	7.7215e-15	No	Yes	uc001kin.2;MYOF;chr10:95237074-95247074;uc001kio.2;MYOF;chr10:95237074-95247074;uc001kip.3;MYOF;chr10:95237074-95247074;uc009xuf.2;MYOF;chr10:95237074-95247074;
chr10:95153368-95242809	89441	chr10	95153368	95156934	chr10	95240975	95242809	3	7.78516e-12	No	Yes	uc001kin.2;MYOF;chr10:95237074-95247074;uc001kio.2;MYOF;chr10:95237074-95247074;uc001kip.3;MYOF;chr10:95237074-95247074;uc009xuf.2;MYOF;chr10:95237074-95247074;
chr10:95191846-95247525	55679	chr10	95191846	95207180	chr10	95222279	95247525	110	0	No	Yes	uc001kin.2;MYOF;chr10:95237074-95247074;uc001kio.2;MYOF;chr10:95237074-95247074;uc001kip.3;MYOF;chr10:95237074-95247074;uc009xuf.2;MYOF;chr10:95237074-95247074;
chr10:95227809-95259534	31725	chr10	95227809	95230546	chr10	95256136	95259534	3	2.95155e-11	No	Yes	uc009xug.2;CEP55;chr10:95251368-95261368;uc001kiq.3;CEP55;chr10:95251388-95261388;
chr10:95439071-95461736	22665	chr10	95439071	95442072	chr10	95459371	95461736	3	3.94412e-13	No	Yes	uc001kiz.1;C10orf4;chr10:95457329-95467329;uc001kiv.1;FRA10AC1;chr10:95457329-95467329;uc001kja.1;C10orf4;chr10:95457344-95467344;uc001kjb.1;C10orf4;chr10:95455095-95465095;uc009xuh.1;C10orf4;chr10:95457913-95467913;
chr10:96106348-96165351	59003	chr10	96106348	96109163	chr10	96162102	96165351	3	5.03165e-12	No	Yes	uc001kjr.2;TBC1D12;chr10:96157185-96167185;
chr10:96941976-96992078	50102	chr10	96941976	96944883	chr10	96989765	96992078	3	1.13565e-11	No	Yes	uc001kkg.1;BC043227;chr10:96985901-96995901;
chr10:97018988-97051430	32442	chr10	97018988	97023049	chr10	97048311	97051430	5	1.45088e-18	No	Yes	uc001kkh.2;PDLIM1;chr10:97045781-97055781;uc001kki.2;PDLIM1;chr10:97045781-97055781;uc009xuv.2;PDLIM1;chr10:97045781-97055781;uc001kkj.1;PDLIM1;chr10:97045781-97055781;
chr10:97440066-97455031	14965	chr10	97440066	97441614	chr10	97451654	97455031	3	1.65375e-14	No	Yes	uc001kla.3;TCTN3;chr10:97447795-97457795;uc001klb.3;TCTN3;chr10:97448900-97458900;uc010qoi.1;TCTN3;chr10:97448900-97458900;uc001kld.2;TCTN3;chr10:97448900-97458900;uc009xux.1;TCTN3;chr10:97448711-97458711;uc009xuy.1;DKFZp564D116;chr10:97448900-97458900;
chr10:98018546-98027759	9213	chr10	98018546	98020304	chr10	98024707	98027759	3	2.14477e-14	No	Yes	uc001kls.3;BLNK;chr10:98026333-98036333;uc001kme.3;BLNK;chr10:98026333-98036333;uc001klt.3;BLNK;chr10:98026333-98036333;uc009xvc.2;SLP65;chr10:98026333-98036333;uc001klu.3;BASH;chr10:98026333-98036333;uc001klv.3;BASH;chr10:98026333-98036333;uc001klw.3;SLP65;chr10:98026333-98036333;uc001klx.3;BLNK;chr10:98026333-98036333;uc001kly.3;BLNK;chr10:98026333-98036333;uc001klz.3;SLP65;chr10:98026333-98036…
chr10:98020465-98031545	11080	chr10	98020465	98023653	chr10	98029291	98031545	3	8.53439e-13	No	Yes	uc001kls.3;BLNK;chr10:98026333-98036333;uc001kme.3;BLNK;chr10:98026333-98036333;uc001klt.3;BLNK;chr10:98026333-98036333;uc009xvc.2;SLP65;chr10:98026333-98036333;uc001klu.3;BASH;chr10:98026333-98036333;uc001klv.3;BASH;chr10:98026333-98036333;uc001klw.3;SLP65;chr10:98026333-98036333;uc001klx.3;BLNK;chr10:98026333-98036333;uc001kly.3;BLNK;chr10:98026333-98036333;uc001klz.3;SLP65;chr10:98026333-98036…
chr10:98525035-98592446	67411	chr10	98525035	98528250	chr10	98589951	98592446	5	2.27541e-21	No	Yes	uc001kmr.2;LCOR;chr10:98587038-98597038;uc001kms.1;LCOR;chr10:98587038-98597038;uc009xvg.1;C10orf12;chr10:98587038-98597038;uc001kmt.1;LCOR;chr10:98587736-98597736;uc001kmu.1;LCOR;chr10:98587798-98597798;
chr10:99113531-99124920	11389	chr10	99113531	99116143	chr10	99121714	99124920	3	5.52004e-14	No	Yes	uc001kne.2;KIAA0690;chr10:99122133-99132133;
chr10:99275538-99336127	60589	chr10	99275538	99279686	chr10	99333593	99336127	3	1.76625e-12	No	Yes	uc001knw.2;ANKRD2;chr10:99327255-99337255;uc009xvu.2;ANKRD2;chr10:99327255-99337255;
chr10:99300634-99333325	32691	chr10	99300634	99304686	chr10	99330230	99333325	5	1.40079e-17	No	Yes	uc001knw.2;ANKRD2;chr10:99327255-99337255;uc009xvu.2;ANKRD2;chr10:99327255-99337255;
chr10:100072281-100176903	104622	chr10	100072281	100074080	chr10	100173582	100176903	3	1.27619e-11	No	Yes	uc001kpb.2;C10orf33;chr10:100166634-100176634;uc001kpc.2;PYROXD2;chr10:100169978-100179978;uc001kpd.2;C10orf33;chr10:100169978-100179978;uc010qpe.1;C10orf33;chr10:100169978-100179978;
chr10:100091213-100174183	82970	chr10	100091213	100093554	chr10	100170634	100174183	3	7.36296e-12	No	Yes	uc001kpb.2;C10orf33;chr10:100166634-100176634;uc001kpc.2;PYROXD2;chr10:100169978-100179978;uc001kpd.2;C10orf33;chr10:100169978-100179978;uc010qpe.1;C10orf33;chr10:100169978-100179978;
chr10:100096795-100175121	78326	chr10	100096795	100100434	chr10	100172658	100175121	4	1.53382e-15	No	Yes	uc001kpb.2;C10orf33;chr10:100166634-100176634;uc001kpc.2;PYROXD2;chr10:100169978-100179978;uc001kpd.2;C10orf33;chr10:100169978-100179978;uc010qpe.1;C10orf33;chr10:100169978-100179978;
chr10:100122941-100175618	52677	chr10	100122941	100125383	chr10	100173117	100175618	3	2.85267e-11	No	Yes	uc001kpb.2;C10orf33;chr10:100166634-100176634;uc001kpc.2;PYROXD2;chr10:100169978-100179978;uc001kpd.2;C10orf33;chr10:100169978-100179978;uc010qpe.1;C10orf33;chr10:100169978-100179978;
chr10:100147479-100177491	30012	chr10	100147479	100150061	chr10	100173441	100177491	3	4.03397e-12	No	Yes	uc001kpb.2;C10orf33;chr10:100166634-100176634;uc001kpc.2;PYROXD2;chr10:100169978-100179978;uc001kpd.2;C10orf33;chr10:100169978-100179978;uc010qpe.1;C10orf33;chr10:100169978-100179978;
chr10:101209533-101381665	172132	chr10	101209533	101211444	chr10	101379087	101381665	3	9.43271e-11	No	Yes	uc001kpx.2;SLC25A28;chr10:101375221-101385221;uc009xwk.1;SLC25A28;chr10:101375221-101385221;
chr10:101533260-101541399	8139	chr10	101533260	101537233	chr10	101537612	101541399	4	2.32227e-15	No	Yes	uc001kqf.2;ABCC2;chr10:101537462-101547462;
chr10:101735232-101769953	34721	chr10	101735232	101738143	chr10	101766013	101769953	3	1.24071e-11	No	Yes	uc001kqj.2;DNMBP;chr10:101764676-101774676;
chr10:103927848-104156616	228768	chr10	103927848	103930880	chr10	104154281	104156616	3	9.6502e-11	No	Yes	uc001kva.2;NFKB2;chr10:104149228-104159228;uc001kvb.2;NFKB2;chr10:104149338-104159338;uc010qqk.1;NFKB2;chr10:104150431-104160431;uc001kvd.2;NFKB2;chr10:104150431-104160431;uc009xxc.2;NFKB2;chr10:104150499-104160499;
chr10:104239146-104264111	24965	chr10	104239146	104241774	chr10	104261149	104264111	3	2.34646e-12	No	Yes	uc001kvv.2;ACTR1A;chr10:104257512-104267512;uc010qqn.1;ACTR1A;chr10:104257512-104267512;uc010qqo.1;ACTR1A;chr10:104257512-104267512;uc001kvw.1;SUFU;chr10:104258763-104268763;uc001kvx.2;SUFU;chr10:104258763-104268763;uc001kvy.1;SUFU;chr10:104258763-104268763;
chr10:104253099-104262564	9465	chr10	104253099	104255155	chr10	104259192	104262564	3	5.38027e-13	No	Yes	uc001kvv.2;ACTR1A;chr10:104257512-104267512;uc010qqn.1;ACTR1A;chr10:104257512-104267512;uc010qqo.1;ACTR1A;chr10:104257512-104267512;uc001kvw.1;SUFU;chr10:104258763-104268763;uc001kvx.2;SUFU;chr10:104258763-104268763;uc001kvy.1;SUFU;chr10:104258763-104268763;
chr10:104367048-104406742	39694	chr10	104367048	104371458	chr10	104402888	104406742	6	5.42795e-20	No	Yes	uc001kvz.2;TRIM8;chr10:104399251-104409251;
chr10:104369010-104402655	33645	chr10	104369010	104371773	chr10	104399855	104402655	3	3.93024e-11	No	Yes	uc001kvz.2;TRIM8;chr10:104399251-104409251;
chr10:104435715-104476077	40362	chr10	104435715	104440254	chr10	104471448	104476077	6	1.1161e-20	No	Yes	uc001kwa.2;ARL3;chr10:104469190-104479190;uc001kwb.2;SFXN2;chr10:104469297-104479297;uc001kwc.2;SFXN;chr10:104469297-104479297;uc001kwd.2;SFXN;chr10:104471366-104481366;
chr10:104526187-104535090	8903	chr10	104526187	104530687	chr10	104531890	104535090	4	3.16198e-18	No	Yes	uc001kwe.3;C10orf26;chr10:104530887-104540887;
chr10:104926700-105002539	75839	chr10	104926700	104930598	chr10	104999163	105002539	5	5.0107e-17	No	Yes	uc009xxi.2;LOC729020;chr10:105000643-105010643;
chr10:104989612-105002507	12895	chr10	104989612	104996050	chr10	104996538	105002507	15	0	No	Yes	uc009xxi.2;LOC729020;chr10:105000643-105010643;
chr10:105023876-105039683	15807	chr10	105023876	105027180	chr10	105037356	105039683	3	2.19066e-14	No	Yes	uc001kwr.2;BC040734;chr10:105031751-105041751;uc009xxj.2;INA;chr10:105031919-105041919;uc001kws.2;INA;chr10:105031919-105041919;
chr10:105473578-105615838	142260	chr10	105473578	105478213	chr10	105612570	105615838	6	5.40393e-24	No	Yes	uc001kxj.1;SH3PXD2A;chr10:105610164-105620164;
chr10:105647335-105728223	80888	chr10	105647335	105650465	chr10	105725745	105728223	4	4.05812e-14	No	Yes	uc001kxo.1;SLK;chr10:105722469-105732469;uc001kxp.1;SLK;chr10:105722469-105732469;
chr10:105647683-105680060	32377	chr10	105647683	105653277	chr10	105674072	105680060	10	5.80216e-33	No	Yes	uc001kxl.2;OBFC1;chr10:105672427-105682427;uc001kxm.2;OBFC1;chr10:105673045-105683045;uc001kxn.2;OBFC1;chr10:105673045-105683045;
chr10:105650703-105729184	78481	chr10	105650703	105656163	chr10	105725599	105729184	5	4.09135e-17	No	Yes	uc001kxo.1;SLK;chr10:105722469-105732469;uc001kxp.1;SLK;chr10:105722469-105732469;
chr10:112073496-112260030	186534	chr10	112073496	112075716	chr10	112256968	112260030	3	4.15343e-12	No	Yes	uc001kzd.2;DUSP5;chr10:112252624-112262624;
chr10:112112274-112258708	146434	chr10	112112274	112114660	chr10	112256231	112258708	3	2.12508e-11	No	Yes	uc001kzd.2;DUSP5;chr10:112252624-112262624;
chr10:112271438-112328884	57446	chr10	112271438	112273229	chr10	112326228	112328884	3	2.59873e-12	No	Yes	uc001kze.2;SMC3;chr10:112322448-112332448;
chr10:112543369-112633232	89863	chr10	112543369	112546703	chr10	112631384	112633232	3	8.69264e-12	No	Yes	uc010qrd.1;LOC282997;chr10:112625662-112635662;uc001kzg.2;PDCD4;chr10:112626595-112636595;uc001kzh.2;PDCD4;chr10:112626595-112636595;uc010qre.1;PDCD4;chr10:112626595-112636595;
chr10:112552586-112633028	80442	chr10	112552586	112556853	chr10	112629501	112633028	3	5.57615e-11	No	Yes	uc010qrd.1;LOC282997;chr10:112625662-112635662;uc001kzg.2;PDCD4;chr10:112626595-112636595;uc001kzh.2;PDCD4;chr10:112626595-112636595;uc010qre.1;PDCD4;chr10:112626595-112636595;
chr10:112563889-112634836	70947	chr10	112563889	112566843	chr10	112632108	112634836	3	7.78652e-12	No	Yes	uc010qrd.1;LOC282997;chr10:112625662-112635662;uc001kzg.2;PDCD4;chr10:112626595-112636595;uc001kzh.2;PDCD4;chr10:112626595-112636595;uc010qre.1;PDCD4;chr10:112626595-112636595;
chr10:112569973-112633611	63638	chr10	112569973	112573106	chr10	112630390	112633611	4	8.36642e-15	No	Yes	uc010qrd.1;LOC282997;chr10:112625662-112635662;uc001kzg.2;PDCD4;chr10:112626595-112636595;uc001kzh.2;PDCD4;chr10:112626595-112636595;uc010qre.1;PDCD4;chr10:112626595-112636595;
chr10:112582606-112639130	56524	chr10	112582606	112584784	chr10	112635301	112639130	3	2.13269e-12	No	Yes	uc010qrd.1;LOC282997;chr10:112625662-112635662;uc001kzg.2;PDCD4;chr10:112626595-112636595;uc001kzh.2;PDCD4;chr10:112626595-112636595;uc010qre.1;PDCD4;chr10:112626595-112636595;
chr10:114523639-114711478	187839	chr10	114523639	114526353	chr10	114708549	114711478	3	2.3202e-12	No	Yes	uc001lac.3;TCF7L2;chr10:114705008-114715008;uc010qrk.1;TCF7L2;chr10:114705008-114715008;uc010qrl.1;TCF7L2;chr10:114705008-114715008;uc010qrm.1;TCF7L2;chr10:114705008-114715008;uc010qrn.1;TCF7L2;chr10:114705008-114715008;uc001lad.3;TCF7L2;chr10:114705008-114715008;uc001lag.3;TCF7L2;chr10:114705008-114715008;uc001laf.3;TCF7L2;chr10:114705008-114715008;uc010qro.1;TCF7L2;chr10:114705008-114715008;uc0…
chr10:114568981-114712736	143755	chr10	114568981	114573144	chr10	114709530	114712736	4	1.67387e-13	No	Yes	uc001lac.3;TCF7L2;chr10:114705008-114715008;uc010qrk.1;TCF7L2;chr10:114705008-114715008;uc010qrl.1;TCF7L2;chr10:114705008-114715008;uc010qrm.1;TCF7L2;chr10:114705008-114715008;uc010qrn.1;TCF7L2;chr10:114705008-114715008;uc001lad.3;TCF7L2;chr10:114705008-114715008;uc001lag.3;TCF7L2;chr10:114705008-114715008;uc001laf.3;TCF7L2;chr10:114705008-114715008;uc010qro.1;TCF7L2;chr10:114705008-114715008;uc0…
chr10:115680544-115805796	125252	chr10	115680544	115684747	chr10	115801020	115805796	6	8.88787e-22	No	Yes	uc001lba.2;ADRB1;chr10:115798805-115808805;
chr10:115716772-115804954	88182	chr10	115716772	115720397	chr10	115801865	115804954	5	1.94558e-16	No	Yes	uc001lba.2;ADRB1;chr10:115798805-115808805;
chr10:115794319-115804467	10148	chr10	115794319	115797518	chr10	115801281	115804467	6	1.13414e-23	No	Yes	uc001lba.2;ADRB1;chr10:115798805-115808805;
chr10:115924111-115940596	16485	chr10	115924111	115926091	chr10	115936906	115940596	3	4.1265e-12	No	Yes	uc001lbb.1;C10orf118;chr10:115929364-115939364;uc001lbc.1;C10orf118;chr10:115929364-115939364;uc009xye.1;C10orf118;chr10:115929364-115939364;uc001lbd.2;C10orf118;chr10:115929364-115939364;uc001lbe.2;C10orf118;chr10:115929364-115939364;uc001lbf.2;TDRD1;chr10:115934028-115944028;uc001lbg.1;TDRD1;chr10:115934028-115944028;uc001lbh.1;TDRD1;chr10:115934050-115944050;uc001lbi.1;TDRD1;chr10:115934349-11…
chr10:116266412-116287074	20662	chr10	116266412	116268735	chr10	116284474	116287074	3	1.41438e-11	No	Yes	uc010qsf.1;ABLIM1;chr10:116281685-116291685;uc009xyn.2;ABLIM1;chr10:116281685-116291685;uc010qsj.1;ABLIM1;chr10:116281685-116291685;
chr10:116275231-116286227	10996	chr10	116275231	116277888	chr10	116283553	116286227	3	3.93528e-13	No	Yes	uc010qsf.1;ABLIM1;chr10:116281685-116291685;uc009xyn.2;ABLIM1;chr10:116281685-116291685;uc010qsj.1;ABLIM1;chr10:116281685-116291685;
chr10:116278296-116288228	9932	chr10	116278296	116281512	chr10	116284242	116288228	7	7.59673e-27	No	Yes	uc010qsf.1;ABLIM1;chr10:116281685-116291685;uc009xyn.2;ABLIM1;chr10:116281685-116291685;uc010qsj.1;ABLIM1;chr10:116281685-116291685;
chr10:116308927-116582119	273192	chr10	116308927	116312101	chr10	116579635	116582119	3	3.85659e-12	No	Yes	uc001lcb.2;FAM160B1;chr10:116576502-116586502;uc001lcc.2;FAM160B1;chr10:116576502-116586502;
chr10:116459513-116583995	124482	chr10	116459513	116462179	chr10	116581003	116583995	3	3.55275e-12	No	Yes	uc001lcb.2;FAM160B1;chr10:116576502-116586502;uc001lcc.2;FAM160B1;chr10:116576502-116586502;
chr10:116564843-116580490	15647	chr10	116564843	116568193	chr10	116577870	116580490	3	6.69519e-13	No	Yes	uc001lcb.2;FAM160B1;chr10:116576502-116586502;uc001lcc.2;FAM160B1;chr10:116576502-116586502;
chr10:117421405-118034540	613135	chr10	117421405	117427759	chr10	118027934	118034540	13	8.37976e-43	No	Yes	uc001lci.2;GFRA1;chr10:118026819-118036819;uc001lcj.2;GFRA1;chr10:118028126-118038126;uc009xyr.2;GFRA1;chr10:118028126-118038126;
chr10:117900277-118034394	134117	chr10	117900277	117904183	chr10	118030891	118034394	3	1.2412e-10	No	Yes	uc001lci.2;GFRA1;chr10:118026819-118036819;uc001lcj.2;GFRA1;chr10:118028126-118038126;uc009xyr.2;GFRA1;chr10:118028126-118038126;
chr10:118014146-118031890	17744	chr10	118014146	118017027	chr10	118028962	118031890	3	1.49577e-11	No	Yes	uc001lci.2;GFRA1;chr10:118026819-118036819;uc001lcj.2;GFRA1;chr10:118028126-118038126;uc009xyr.2;GFRA1;chr10:118028126-118038126;
chr10:118596184-118608808	12624	chr10	118596184	118600317	chr10	118606262	118608808	4	2.19261e-16	No	Yes	uc001lcu.2;HSPA12A;chr10:118604716-118614716;uc001lcw.2;C10orf134;chr10:118604022-118614022;
chr10:118718724-118766816	48092	chr10	118718724	118721628	chr10	118764683	118766816	3	6.33171e-12	No	Yes	uc009xyw.2;KIAA1598;chr10:118760088-118770088;uc001lcz.3;KIAA1598;chr10:118760088-118770088;uc010qso.1;KIAA1598;chr10:118760088-118770088;uc010qsp.1;KIAA1598;chr10:118760088-118770088;
chr10:120502529-120514744	12215	chr10	120502529	120505726	chr10	120512303	120514744	3	1.87349e-12	No	Yes	uc010qst.1;C10orf46;chr10:120509758-120519758;uc001lds.1;C10orf46;chr10:120509758-120519758;
chr10:120890362-120925500	35138	chr10	120890362	120894333	chr10	120923929	120925500	3	1.01907e-11	No	Yes	uc001ldy.2;SFXN4;chr10:120915657-120925657;uc001ldz.2;SFXN4;chr10:120919882-120929882;uc001leb.2;SFXN4;chr10:120920204-120930204;uc001lea.2;BCRM1;chr10:120920204-120930204;
chr10:121249596-121356820	107224	chr10	121249596	121252899	chr10	121354779	121356820	3	2.68792e-11	No	Yes	uc001leh.1;TIAL1;chr10:121348025-121358025;uc001lei.1;TIAL1;chr10:121351541-121361541;uc001lej.1;TIAL1;chr10:121351541-121361541;uc001lek.1;TIAL1;chr10:121351541-121361541;uc009xzi.1;TIAL1;chr10:121351541-121361541;uc010qtb.1;TIAL1;chr10:121351541-121361541;
chr10:121254098-121304314	50216	chr10	121254098	121257522	chr10	121301694	121304314	3	3.50057e-11	No	Yes	uc001leg.2;RGS10;chr10:121297222-121307222;
chr10:121267854-121357412	89558	chr10	121267854	121269946	chr10	121354906	121357412	3	7.78137e-12	No	Yes	uc001leh.1;TIAL1;chr10:121348025-121358025;uc001lei.1;TIAL1;chr10:121351541-121361541;uc001lej.1;TIAL1;chr10:121351541-121361541;uc001lek.1;TIAL1;chr10:121351541-121361541;uc009xzi.1;TIAL1;chr10:121351541-121361541;uc010qtb.1;TIAL1;chr10:121351541-121361541;
chr10:121269549-121283891	14342	chr10	121269549	121273295	chr10	121281204	121283891	4	9.05963e-19	No	Yes	uc001lee.2;RGS10;chr10:121281961-121291961;
chr10:121366852-121414277	47425	chr10	121366852	121370205	chr10	121409719	121414277	6	6.60083e-22	No	Yes	uc001lel.2;BAG3;chr10:121405881-121415881;uc001lem.2;BAG3;chr10:121405881-121415881;
chr10:121619869-121653757	33888	chr10	121619869	121624412	chr10	121650993	121653757	5	1.11878e-18	No	Yes	uc001leu.1;SEC23IP;chr10:121647222-121657222;uc010qtc.1;SEC23IP;chr10:121647222-121657222;
chr10:123268681-123358707	90026	chr10	123268681	123271781	chr10	123355837	123358707	3	1.93759e-12	No	Yes	uc010qtg.1;FGFR2;chr10:123348481-123358481;uc010qth.1;FGFR2;chr10:123348772-123358772;uc010qti.1;FGFR2;chr10:123351159-123361159;uc010qtj.1;FGFR2;chr10:123352972-123362972;uc010qtk.1;FGFR2;chr10:123352972-123362972;uc010qtl.1;FGFR2;chr10:123352972-123362972;uc010qtm.1;FGFR2;chr10:123352972-123362972;uc001lfl.3;FGFR2;chr10:123348481-123358481;uc001lfm.2;FGFR2;chr10:123352972-123362972;uc001lfn.3;K…
chr10:123657234-123688928	31694	chr10	123657234	123659324	chr10	123685970	123688928	3	9.82878e-12	No	Yes	uc001lfp.2;ATE1;chr10:123682546-123692546;uc001lfq.2;ATE1;chr10:123682546-123692546;uc010qtr.1;ATE1;chr10:123682546-123692546;uc010qts.1;ATE1;chr10:123682546-123692546;uc010qtt.1;ATE1;chr10:123683217-123693217;uc001lfr.2;ATE1;chr10:123683217-123693217;uc009xzu.2;ATE1;chr10:123683217-123693217;
chr10:123809988-123873105	63117	chr10	123809988	123812477	chr10	123871220	123873105	3	1.75914e-11	No	Yes	uc001lfx.2;TACC2;chr10:123867553-123877553;
chr10:123814533-123873948	59415	chr10	123814533	123818314	chr10	123871750	123873948	4	1.7558e-14	No	Yes	uc001lfx.2;TACC2;chr10:123867553-123877553;
chr10:123840862-123875161	34299	chr10	123840862	123844796	chr10	123871471	123875161	4	9.11173e-15	No	Yes	uc001lfx.2;TACC2;chr10:123867553-123877553;
chr10:123860848-123874833	13985	chr10	123860848	123864174	chr10	123870112	123874833	7	4.38888e-26	No	Yes	uc001lfx.2;TACC2;chr10:123867553-123877553;
chr10:124121879-124135087	13208	chr10	124121879	124124062	chr10	124132018	124135087	3	3.06918e-12	No	Yes	uc001lge.1;PLEKHA1;chr10:124129219-124139219;
chr10:124801165-124915875	114710	chr10	124801165	124804231	chr10	124913160	124915875	3	8.82212e-12	No	Yes	uc009yah.2;BUB3;chr10:124908759-124918759;uc001lhf.3;BUB3;chr10:124908759-124918759;uc001lhd.2;BUB3;chr10:124908759-124918759;uc001lhe.2;BUB3;chr10:124908759-124918759;uc010qud.1;BUB3;chr10:124908759-124918759;
chr10:125751889-125854663	102774	chr10	125751889	125758263	chr10	125850553	125854663	5	1.10883e-15	No	Yes	uc001lhm.2;CHST15;chr10:125846930-125856930;uc001lhn.2;CHST15;chr10:125848206-125858206;uc010que.1;CHST15;chr10:125846930-125856930;uc001lho.2;CHST15;chr10:125848206-125858206;
chr10:125783837-125853543	69706	chr10	125783837	125790215	chr10	125850490	125853543	8	1.10784e-28	No	Yes	uc001lhm.2;CHST15;chr10:125846930-125856930;uc001lhn.2;CHST15;chr10:125848206-125858206;uc010que.1;CHST15;chr10:125846930-125856930;uc001lho.2;CHST15;chr10:125848206-125858206;
chr10:125792165-125854165	62000	chr10	125792165	125796142	chr10	125849240	125854165	8	5.82057e-29	No	Yes	uc001lhm.2;CHST15;chr10:125846930-125856930;uc001lhn.2;CHST15;chr10:125848206-125858206;uc010que.1;CHST15;chr10:125846930-125856930;uc001lho.2;CHST15;chr10:125848206-125858206;
chr10:125823052-125854424	31372	chr10	125823052	125827078	chr10	125851177	125854424	4	2.15379e-13	No	Yes	uc001lhm.2;CHST15;chr10:125846930-125856930;uc001lhn.2;CHST15;chr10:125848206-125858206;uc010que.1;CHST15;chr10:125846930-125856930;uc001lho.2;CHST15;chr10:125848206-125858206;
chr10:125827081-125853997	26916	chr10	125827081	125830368	chr10	125851774	125853997	4	8.90324e-15	No	Yes	uc001lhm.2;CHST15;chr10:125846930-125856930;uc001lhn.2;CHST15;chr10:125848206-125858206;uc010que.1;CHST15;chr10:125846930-125856930;uc001lho.2;CHST15;chr10:125848206-125858206;
chr10:125837351-125852894	15543	chr10	125837351	125839612	chr10	125850418	125852894	4	7.48366e-16	No	Yes	uc001lhm.2;CHST15;chr10:125846930-125856930;uc001lhn.2;CHST15;chr10:125848206-125858206;uc010que.1;CHST15;chr10:125846930-125856930;uc001lho.2;CHST15;chr10:125848206-125858206;
chr10:126315286-126433077	117791	chr10	126315286	126317862	chr10	126431090	126433077	4	2.96244e-15	No	Yes	uc001lhv.1;FAM53B;chr10:126427930-126437930;uc001lhw.2;FAM53B;chr10:126427930-126437930;
chr10:126324997-126431513	106516	chr10	126324997	126327371	chr10	126429936	126431513	3	2.27615e-13	No	Yes	uc001lhv.1;FAM53B;chr10:126427930-126437930;uc001lhw.2;FAM53B;chr10:126427930-126437930;
chr10:126337020-126435873	98853	chr10	126337020	126341998	chr10	126432881	126435873	5	4.47366e-19	No	Yes	uc001lhv.1;FAM53B;chr10:126427930-126437930;uc001lhw.2;FAM53B;chr10:126427930-126437930;
chr10:126703581-126713499	9918	chr10	126703581	126707444	chr10	126708305	126713499	6	4.18426e-23	No	Yes	uc001lie.3;CTBP2;chr10:126711453-126721453;
chr10:126747847-126851619	103772	chr10	126747847	126752667	chr10	126847080	126851619	9	8.33792e-28	No	Yes	uc009yak.2;CTBP2;chr10:126842285-126852285;uc009yal.2;CTBP2;chr10:126844103-126854103;uc001lif.3;CTBP2;chr10:126844103-126854103;uc001lih.3;CTBP2;chr10:126844624-126854624;
chr10:126781857-126848946	67089	chr10	126781857	126784715	chr10	126846644	126848946	3	8.86863e-11	No	Yes	uc009yak.2;CTBP2;chr10:126842285-126852285;uc009yal.2;CTBP2;chr10:126844103-126854103;uc001lif.3;CTBP2;chr10:126844103-126854103;uc001lih.3;CTBP2;chr10:126844624-126854624;
chr10:129669802-129707190	37388	chr10	129669802	129675938	chr10	129704124	129707190	7	2.21625e-26	No	Yes	uc001lkb.2;PTPRE;chr10:129700324-129710324;uc009yat.2;PTPRE;chr10:129700324-129710324;
chr10:131247924-131265716	17792	chr10	131247924	131250211	chr10	131262201	131265716	3	4.70578e-13	No	Yes	uc001lkh.2;MGMT;chr10:131260453-131270453;
chr10:131916935-131936068	19133	chr10	131916935	131920034	chr10	131932663	131936068	4	2.06215e-15	No	Yes	uc001lkm.1;GLRX3;chr10:131929662-131939662;uc001lkn.1;GLRX3;chr10:131929662-131939662;uc001lko.2;GLRX3;chr10:131929662-131939662;
chr10:131920540-131935923	15383	chr10	131920540	131923577	chr10	131933437	131935923	3	3.85301e-12	No	Yes	uc001lkm.1;GLRX3;chr10:131929662-131939662;uc001lkn.1;GLRX3;chr10:131929662-131939662;uc001lko.2;GLRX3;chr10:131929662-131939662;
chr10:133991620-134004140	12520	chr10	133991620	133994458	chr10	134001554	134004140	3	1.95836e-13	No	Yes	uc009ybb.2;DPYSL4;chr10:133995413-134005413;
chr10:134307471-134331963	24492	chr10	134307471	134310330	chr10	134329767	134331963	3	5.89042e-13	No	Yes	uc001lln.2;AF086154;chr10:134326695-134336695;
chr11:1103790-1247124	143334	chr11	1103790	1107048	chr11	1243155	1247124	4	1.68177e-13	No	Yes	uc009yct.1;MUC;chr11:1239295-1249295;uc001lta.2;MUC;chr11:1245399-1255399;uc001ltb.2;MUC5B;chr11:1239295-1249295;
chr11:1106016-1148881	42865	chr11	1106016	1109141	chr11	1144956	1148881	4	1.27036e-13	No	Yes	uc009ycr.1;MUC5AC;chr11:1137473-1147473;
chr11:1107447-1243028	135581	chr11	1107447	1110816	chr11	1240406	1243028	3	7.87367e-11	No	Yes	uc009yct.1;MUC;chr11:1239295-1249295;uc001ltb.2;MUC5B;chr11:1239295-1249295;
chr11:1108684-1247367	138683	chr11	1108684	1113074	chr11	1243141	1247367	6	3.972e-19	No	Yes	uc009yct.1;MUC;chr11:1239295-1249295;uc001lta.2;MUC;chr11:1245399-1255399;uc001ltb.2;MUC5B;chr11:1239295-1249295;
chr11:1109214-1148793	39579	chr11	1109214	1116741	chr11	1144063	1148793	12	5.82989e-40	No	Yes	uc009ycr.1;MUC5AC;chr11:1137473-1147473;
chr11:1120537-1247750	127213	chr11	1120537	1123824	chr11	1242665	1247750	5	4.59467e-16	No	Yes	uc009yct.1;MUC;chr11:1239295-1249295;uc001lta.2;MUC;chr11:1245399-1255399;uc001ltb.2;MUC5B;chr11:1239295-1249295;
chr11:1121035-1146897	25862	chr11	1121035	1125682	chr11	1141544	1146897	5	7.0185e-17	No	Yes	uc009ycr.1;MUC5AC;chr11:1137473-1147473;
chr11:1131559-1147307	15748	chr11	1131559	1134770	chr11	1144469	1147307	4	4.16001e-15	No	Yes	uc009ycr.1;MUC5AC;chr11:1137473-1147473;
chr11:1132175-1144208	12033	chr11	1132175	1134984	chr11	1141644	1144208	3	3.20603e-13	No	Yes	uc009ycr.1;MUC5AC;chr11:1137473-1147473;
chr11:1478074-1508964	30890	chr11	1478074	1480136	chr11	1505300	1508964	4	5.07522e-19	No	Yes	uc001lto.1;HCCA2;chr11:1497115-1507115;uc001ltp.1;HCCA2;chr11:1497115-1507115;uc010qwy.1;HCCA2;chr11:1497125-1507125;uc010qwz.1;HCCA2;chr11:1502976-1512976;
chr11:1753131-1860855	107724	chr11	1753131	1763318	chr11	1848978	1860855	22	0	No	Yes	uc009ydb.1;SYT8;chr11:1851326-1861326;uc010qxb.1;SYT8;chr11:1843708-1853708;uc001lue.1;SYT8;chr11:1850673-1860673;uc001lud.2;SYT8;chr11:1850761-1860761;uc001luf.1;SYT8;chr11:1851033-1861033;uc010qxc.1;TNNI2;chr11:1855232-1865232;uc010qxd.1;TNNI2;chr11:1855718-1865718;uc010qxe.1;TNNI2;chr11:1856431-1866431;
chr11:1797547-1853142	55595	chr11	1797547	1799668	chr11	1849626	1853142	4	8.20025e-14	No	Yes	uc009ydb.1;SYT8;chr11:1851326-1861326;uc010qxb.1;SYT8;chr11:1843708-1853708;uc001lue.1;SYT8;chr11:1850673-1860673;uc001lud.2;SYT8;chr11:1850761-1860761;uc001luf.1;SYT8;chr11:1851033-1861033;
chr11:1799987-1855878	55891	chr11	1799987	1809518	chr11	1846744	1855878	23	0	No	Yes	uc009ydb.1;SYT8;chr11:1851326-1861326;uc010qxb.1;SYT8;chr11:1843708-1853708;uc001lue.1;SYT8;chr11:1850673-1860673;uc001lud.2;SYT8;chr11:1850761-1860761;uc001luf.1;SYT8;chr11:1851033-1861033;uc010qxc.1;TNNI2;chr11:1855232-1865232;uc010qxd.1;TNNI2;chr11:1855718-1865718;
chr11:1800708-1846555	45847	chr11	1800708	1803359	chr11	1844301	1846555	4	2.5764e-14	No	Yes	uc010qxb.1;SYT8;chr11:1843708-1853708;
chr11:1815110-1855524	40414	chr11	1815110	1823357	chr11	1843963	1855524	29	0	No	Yes	uc009ydb.1;SYT8;chr11:1851326-1861326;uc010qxb.1;SYT8;chr11:1843708-1853708;uc001lue.1;SYT8;chr11:1850673-1860673;uc001lud.2;SYT8;chr11:1850761-1860761;uc001luf.1;SYT8;chr11:1851033-1861033;uc010qxc.1;TNNI2;chr11:1855232-1865232;
chr11:1823667-1851810	28143	chr11	1823667	1825774	chr11	1848425	1851810	3	6.40688e-11	No	Yes	uc009ydb.1;SYT8;chr11:1851326-1861326;uc010qxb.1;SYT8;chr11:1843708-1853708;uc001lue.1;SYT8;chr11:1850673-1860673;uc001lud.2;SYT8;chr11:1850761-1860761;uc001luf.1;SYT8;chr11:1851033-1861033;
chr11:2117177-2160624	43447	chr11	2117177	2121109	chr11	2155631	2160624	5	6.38427e-19	No	Yes	uc001lvf.2;pp9974;chr11:2149904-2159904;uc001lvj.1;IGF2;chr11:2153502-2163502;uc009yde.2;IGF2;chr11:2153518-2163518;uc001lvg.2;IGF2;chr11:2155204-2165204;uc009ydf.2;IGF2;chr11:2157341-2167341;uc001lvk.1;PEG8/IGF2AS;chr11:2156736-2166736;uc010qxi.1;IGF2AS;chr11:2156736-2166736;uc001lvl.1;PEG8/IGF2AS;chr11:2156736-2166736;
chr11:2118174-2154775	36601	chr11	2118174	2120760	chr11	2151814	2154775	3	6.11677e-14	No	Yes	uc001lvf.2;pp9974;chr11:2149904-2159904;uc001lvj.1;IGF2;chr11:2153502-2163502;uc009yde.2;IGF2;chr11:2153518-2163518;
chr11:2137237-2159036	21799	chr11	2137237	2141682	chr11	2156653	2159036	4	3.65545e-16	No	Yes	uc001lvf.2;pp9974;chr11:2149904-2159904;uc001lvj.1;IGF2;chr11:2153502-2163502;uc009yde.2;IGF2;chr11:2153518-2163518;uc001lvg.2;IGF2;chr11:2155204-2165204;uc009ydf.2;IGF2;chr11:2157341-2167341;uc001lvk.1;PEG8/IGF2AS;chr11:2156736-2166736;uc010qxi.1;IGF2AS;chr11:2156736-2166736;uc001lvl.1;PEG8/IGF2AS;chr11:2156736-2166736;
chr11:2211647-2297424	85777	chr11	2211647	2231104	chr11	2276706	2297424	65	0	No	Yes	uc001lvu.2;ASCL2;chr11:2287182-2297182;
chr11:2223399-2327916	104517	chr11	2223399	2225346	chr11	2325938	2327916	3	5.29671e-13	No	Yes	uc009ydj.2;C11orf21;chr11:2318143-2328143;uc001lvv.2;C11orf21;chr11:2318143-2328143;uc001lvx.1;TSPAN32;chr11:2318242-2328242;uc009ydk.1;TSPAN32;chr11:2318242-2328242;uc010qxk.1;TSSC6;chr11:2318242-2328242;uc001lvy.1;TSPAN32;chr11:2318242-2328242;uc009ydl.1;TSSC6;chr11:2318242-2328242;uc001lvz.1;TSPAN32;chr11:2318937-2328937;uc001lwb.1;TSPAN32;chr11:2319073-2329073;uc001lwc.1;TSPAN32;chr11:2319073…
chr11:2249958-2292524	42566	chr11	2249958	2252603	chr11	2289866	2292524	3	8.18586e-12	No	Yes	uc001lvu.2;ASCL2;chr11:2287182-2297182;
chr11:2589598-2721766	132168	chr11	2589598	2592272	chr11	2719645	2721766	3	5.46421e-13	No	Yes	uc001lwp.2;KCNQ1OT1;chr11:2716228-2726228;
chr11:6237044-6256430	19386	chr11	6237044	6239203	chr11	6254087	6256430	3	4.15885e-14	No	Yes	uc001mck.3;FAM160A2;chr11:6250941-6260941;uc001mcl.3;FAM160A2;chr11:6250941-6260941;uc001mcm.2;FAM160A2;chr11:6250941-6260941;uc010raa.1;CNGA4;chr11:6250994-6260994;uc001mcn.2;CNGA4;chr11:6251123-6261123;uc001mco.2;CNGA4;chr11:6255329-6265329;
chr11:9090840-9112612	21772	chr11	9090840	9093994	chr11	9109730	9112612	4	5.45723e-16	No	Yes	uc001mhh.1;SCUBE2;chr11:9108155-9118155;uc001mhi.1;SCUBE2;chr11:9108155-9118155;uc001mhj.1;SCUBE2;chr11:9108155-9118155;uc010rbv.1;FLJ46111;chr11:9110909-9120909;
chr11:9096453-9113548	17095	chr11	9096453	9100009	chr11	9109171	9113548	7	7.73972e-26	No	Yes	uc001mhh.1;SCUBE2;chr11:9108155-9118155;uc001mhi.1;SCUBE2;chr11:9108155-9118155;uc001mhj.1;SCUBE2;chr11:9108155-9118155;uc010rbv.1;FLJ46111;chr11:9110909-9120909;
chr11:10201975-10317038	115063	chr11	10201975	10204462	chr11	10314656	10317038	3	1.41407e-12	No	Yes	uc001mib.2;SBF2;chr11:10310754-10320754;
chr11:10207800-10315934	108134	chr11	10207800	10209876	chr11	10313858	10315934	3	1.98429e-13	No	Yes	uc001mib.2;SBF2;chr11:10310754-10320754;
chr11:10227925-10316314	88389	chr11	10227925	10230421	chr11	10313078	10316314	3	6.34783e-12	No	Yes	uc001mib.2;SBF2;chr11:10310754-10320754;
chr11:10293712-10326890	33178	chr11	10293712	10297432	chr11	10324720	10326890	3	8.33841e-12	No	Yes	uc001mik.1;ADM;chr11:10321630-10331630;uc001mil.1;ADM;chr11:10321641-10331641;uc001mim.1;ADM;chr11:10321641-10331641;
chr11:10900597-10922657	22060	chr11	10900597	10902440	chr11	10920166	10922657	3	6.16073e-13	No	Yes	uc001mjn.1;AK056982;chr11:10915824-10925824;
chr11:12105788-12250610	144822	chr11	12105788	12109309	chr11	12246915	12250610	3	5.32184e-12	No	Yes	uc010rcj.1;KIAA0750;chr11:12239163-12249163;
chr11:12267186-12304390	37204	chr11	12267186	12271877	chr11	12300652	12304390	7	3.66327e-23	No	Yes	uc001mkg.1;MICALCL;chr11:12303446-12313446;
chr11:12272226-12305110	32884	chr11	12272226	12275943	chr11	12301499	12305110	4	4.03194e-15	No	Yes	uc001mkg.1;MICALCL;chr11:12303446-12313446;
chr11:14291175-14381430	90255	chr11	14291175	14294077	chr11	14379313	14381430	3	7.96542e-12	No	Yes	uc009ygq.2;RRAS2;chr11:14375031-14385031;uc001mlf.3;RRAS2;chr11:14375729-14385729;uc010rco.1;RRAS2;chr11:14375729-14385729;
chr11:16956450-17099351	142901	chr11	16956450	16960199	chr11	17097613	17099351	3	4.39799e-11	No	Yes	uc001mmp.2;RPS13;chr11:17094220-17104220;
chr11:16964676-17037056	72380	chr11	16964676	16968631	chr11	17033514	17037056	6	3.27437e-21	No	Yes	uc010rcu.1;PLEKHA7;chr11:17030963-17040963;uc001mmo.2;PLEKHA7;chr11:17030963-17040963;
chr11:16974672-17036270	61598	chr11	16974672	16978639	chr11	17033931	17036270	6	1.67305e-21	No	Yes	uc010rcu.1;PLEKHA7;chr11:17030963-17040963;uc001mmo.2;PLEKHA7;chr11:17030963-17040963;
chr11:16980966-17037153	56187	chr11	16980966	16983226	chr11	17033903	17037153	3	1.31904e-10	No	Yes	uc010rcu.1;PLEKHA7;chr11:17030963-17040963;uc001mmo.2;PLEKHA7;chr11:17030963-17040963;
chr11:16995340-17036418	41078	chr11	16995340	16999228	chr11	17033547	17036418	3	4.7571e-11	No	Yes	uc010rcu.1;PLEKHA7;chr11:17030963-17040963;uc001mmo.2;PLEKHA7;chr11:17030963-17040963;
chr11:17001912-17037700	35788	chr11	17001912	17011357	chr11	17032509	17037700	15	0	No	Yes	uc010rcu.1;PLEKHA7;chr11:17030963-17040963;uc001mmo.2;PLEKHA7;chr11:17030963-17040963;
chr11:17538690-17550590	11900	chr11	17538690	17542408	chr11	17546927	17550590	3	5.46009e-14	No	Yes	uc001mnd.2;USH1C;chr11:17550057-17560057;
chr11:18307340-18344104	36764	chr11	18307340	18310591	chr11	18340181	18344104	5	1.0077e-19	No	Yes	uc001mod.1;HPS5;chr11:18338721-18348721;uc001moe.1;HPS5;chr11:18338721-18348721;uc001mof.1;HPS5;chr11:18338721-18348721;uc001mog.1;HGRHSV1;chr11:18338721-18348721;uc001moi.2;GTF2H1;chr11:18338815-18348815;uc001moh.2;GTF2H1;chr11:18338815-18348815;uc009yhm.2;GTF2H1;chr11:18338815-18348815;
chr11:18597269-18613112	15843	chr11	18597269	18603847	chr11	18605648	18613112	11	5.532e-40	No	Yes	uc001mot.2;UEVLD;chr11:18605281-18615281;uc001mou.2;UEVLD;chr11:18605281-18615281;uc010rde.1;UEVLD;chr11:18605281-18615281;uc010rdf.1;UEVLD;chr11:18605281-18615281;uc010rdg.1;UEVLD;chr11:18605281-18615281;uc001mov.2;UEVLD;chr11:18605281-18615281;uc010rdh.1;UEVLD;chr11:18605281-18615281;
chr11:19970569-20055699	85130	chr11	19970569	19975299	chr11	20049108	20055699	9	5.39563e-32	No	Yes	uc001mpt.2;NAV2;chr11:20039383-20049383;uc009yhy.1;NAV2;chr11:20044136-20054136;uc009yhx.2;NAV2;chr11:20039635-20049635;
chr11:19992181-20050934	58753	chr11	19992181	19994376	chr11	20047519	20050934	3	7.90891e-12	No	Yes	uc001mpt.2;NAV2;chr11:20039383-20049383;uc009yhy.1;NAV2;chr11:20044136-20054136;uc009yhx.2;NAV2;chr11:20039635-20049635;
chr11:19997391-20056777	59386	chr11	19997391	20006156	chr11	20047405	20056777	18	0	No	Yes	uc001mpt.2;NAV2;chr11:20039383-20049383;uc009yhy.1;NAV2;chr11:20044136-20054136;uc009yhx.2;NAV2;chr11:20039635-20049635;
chr11:20011667-20062349	50682	chr11	20011667	20024414	chr11	20046807	20062349	28	0	No	Yes	uc001mpt.2;NAV2;chr11:20039383-20049383;uc009yhy.1;NAV2;chr11:20044136-20054136;uc009yhx.2;NAV2;chr11:20039635-20049635;
chr11:21181589-62448033	41266444	chr11	21181589	21183110	chr11	62446131	62448033	3	6.38546e-14	No	Yes	uc001nuj.2;UBXN1;chr11:62441527-62451527;uc001num.1;UBXN1;chr11:62441527-62451527;uc001nul.1;UBXN1;chr11:62441527-62451527;uc010rme.1;UBXN1;chr11:62441527-62451527;uc010rmf.1;UBXN1;chr11:62441527-62451527;uc001nuk.2;UBXN1;chr11:62441545-62451545;
chr11:27231045-27494838	263793	chr11	27231045	27234560	chr11	27492364	27494838	3	1.22768e-11	No	Yes	uc001mrj.3;LGR4;chr11:27489334-27499334;uc001mrk.3;LGR4;chr11:27489334-27499334;
chr11:33147528-33184125	36597	chr11	33147528	33150547	chr11	33179225	33184125	4	6.35351e-16	No	Yes	uc001muh.2;CSTF3;chr11:33178037-33188037;uc001mui.2;CSTF3;chr11:33178037-33188037;uc001muj.2;CSTF3;chr11:33178037-33188037;uc001muk.2;BC043375;chr11:33178233-33188233;
chr11:34143824-34381840	238016	chr11	34143824	34148439	chr11	34378194	34381840	4	2.73557e-14	No	Yes	uc001mvl.1;ABTB2;chr11:34373802-34383802;
chr11:34186094-34382585	196491	chr11	34186094	34192097	chr11	34378097	34382585	10	5.55261e-33	No	Yes	uc001mvl.1;ABTB2;chr11:34373802-34383802;
chr11:34270206-34380931	110725	chr11	34270206	34274230	chr11	34378598	34380931	3	1.01685e-10	No	Yes	uc001mvl.1;ABTB2;chr11:34373802-34383802;
chr11:34295302-34380929	85627	chr11	34295302	34298402	chr11	34377411	34380929	7	1.13934e-23	No	Yes	uc001mvl.1;ABTB2;chr11:34373802-34383802;
chr11:34336235-34380179	43944	chr11	34336235	34339899	chr11	34377222	34380179	3	3.82252e-11	No	Yes	uc001mvl.1;ABTB2;chr11:34373802-34383802;
chr11:34370190-34381177	10987	chr11	34370190	34372687	chr11	34377981	34381177	3	8.20003e-11	No	Yes	uc001mvl.1;ABTB2;chr11:34373802-34383802;
chr11:35626865-35635090	8225	chr11	35626865	35629023	chr11	35631218	35635090	3	1.11666e-13	No	Yes	uc001mwh.2;FJX1;chr11:35634734-35644734;
chr11:35657740-35685801	28061	chr11	35657740	35664554	chr11	35682444	35685801	8	6.38356e-30	No	Yes	uc001mwi.2;TRIM44;chr11:35679352-35689352;
chr11:35821790-35833470	11680	chr11	35821790	35824592	chr11	35830199	35833470	4	7.58657e-19	No	Yes	uc001mwj.1;AX746752;chr11:35830881-35840881;
chr11:45836782-45870636	33854	chr11	45836782	45839612	chr11	45867458	45870636	4	2.514e-13	No	Yes	uc009ykw.2;CRY2;chr11:45863668-45873668;uc010rgn.1;CRY2;chr11:45863956-45873956;
chr11:47215549-47239012	23463	chr11	47215549	47217422	chr11	47236741	47239012	3	6.19632e-11	No	Yes	uc001neb.2;DDB2;chr11:47231492-47241492;uc001nec.2;ddb2;chr11:47231492-47241492;uc009yli.1;DDB2;chr11:47231492-47241492;uc001ned.2;ddb2;chr11:47231492-47241492;uc001nee.2;DDB2;chr11:47231492-47241492;uc001nef.2;DDB2;chr11:47231645-47241645;uc001neg.2;DDB2;chr11:47232886-47242886;uc001neh.2;ddb2;chr11:47233408-47243408;
chr11:47215685-47236722	21037	chr11	47215685	47217405	chr11	47234884	47236722	3	4.4378e-11	No	Yes	uc001neb.2;DDB2;chr11:47231492-47241492;uc001nec.2;ddb2;chr11:47231492-47241492;uc009yli.1;DDB2;chr11:47231492-47241492;uc001ned.2;ddb2;chr11:47231492-47241492;uc001nee.2;DDB2;chr11:47231492-47241492;uc001nef.2;DDB2;chr11:47231645-47241645;uc001neg.2;DDB2;chr11:47232886-47242886;uc001neh.2;ddb2;chr11:47233408-47243408;
chr11:47221734-47237914	16180	chr11	47221734	47225350	chr11	47234682	47237914	3	3.21652e-11	No	Yes	uc001neb.2;DDB2;chr11:47231492-47241492;uc001nec.2;ddb2;chr11:47231492-47241492;uc009yli.1;DDB2;chr11:47231492-47241492;uc001ned.2;ddb2;chr11:47231492-47241492;uc001nee.2;DDB2;chr11:47231492-47241492;uc001nef.2;DDB2;chr11:47231645-47241645;uc001neg.2;DDB2;chr11:47232886-47242886;uc001neh.2;ddb2;chr11:47233408-47243408;
chr11:47537508-47576003	38495	chr11	47537508	47540413	chr11	47573164	47576003	3	2.38093e-11	No	Yes	uc001nfn.2;CUGBP1;chr11:47569688-47579688;uc001nfp.2;CUGBP1;chr11:47569688-47579688;uc001nfq.1;CUGBP1;chr11:47569688-47579688;
chr11:47964794-48003518	38724	chr11	47964794	47968609	chr11	48000698	48003518	3	7.26093e-11	No	Yes	uc001ngo.3;PTPRJ;chr11:47997109-48007109;uc001ngp.3;PTPRJ;chr11:47997109-48007109;
chr11:60137311-60145403	8092	chr11	60137311	60140910	chr11	60142684	60145403	5	9.94713e-23	No	Yes	uc009ymx.1;MS4A7;chr11:60140957-60150957;uc001npe.2;MS4A7;chr11:60140957-60150957;uc001npf.2;MS4A7;chr11:60140957-60150957;uc001npg.2;MS4A7;chr11:60140957-60150957;uc001nph.2;MS4A7;chr11:60140957-60150957;uc001npi.2;MS4A14;chr11:60140957-60150957;
chr11:61227516-61273779	46263	chr11	61227516	61229868	chr11	61271610	61273779	3	2.64796e-14	No	Yes	uc010rlk.1;LRRC10B;chr11:61271271-61281271;
chr11:62196161-62311334	115173	chr11	62196161	62199633	chr11	62307876	62311334	4	3.19752e-15	No	Yes	uc001ntk.1;AHNAK;chr11:62309332-62319332;uc001ntl.2;AHNAK;chr11:62309332-62319332;
chr11:62264064-62324170	60106	chr11	62264064	62269761	chr11	62316551	62324170	10	2.24552e-31	No	Yes	uc001ntk.1;AHNAK;chr11:62309332-62319332;uc001ntl.2;AHNAK;chr11:62309332-62319332;
chr11:64377074-64390419	13345	chr11	64377074	64379165	chr11	64387465	64390419	3	3.69317e-14	No	Yes	uc001oao.2;NRXN2;chr11:64386468-64396468;
chr11:65415695-65552161	136466	chr11	65415695	65418870	chr11	65549508	65552161	3	1.09094e-10	No	Yes	uc001ofo.3;DKFZp761E198;chr11:65542822-65552822;uc001ofp.2;OVOL1;chr11:65549528-65559528;
chr11:65418221-65480129	61908	chr11	65418221	65420549	chr11	65478098	65480129	3	1.26345e-08	No	Yes	uc001ofi.2;KAT5;chr11:65474488-65484488;uc001ofj.2;KAT5;chr11:65474488-65484488;uc001ofk.2;KAT5;chr11:65474488-65484488;uc010roo.1;KAT5;chr11:65474488-65484488;uc001ofl.2;KAT5;chr11:65475090-65485090;
chr11:66178617-66237657	59040	chr11	66178617	66182846	chr11	66233646	66237657	3	2.48792e-11	No	Yes	uc001oib.2;PELI3;chr11:66229335-66239335;uc010rpd.1;PELI3;chr11:66235704-66245704;uc001oic.3;PELI3;chr11:66229335-66239335;uc001oid.3;PELI3;chr11:66229335-66239335;uc001oie.3;PELI3;chr11:66229335-66239335;
chr11:66594061-66612000	17939	chr11	66594061	66596988	chr11	66609694	66612000	3	2.15973e-10	No	Yes	uc001ojk.1;RCE1;chr11:66605882-66615882;uc001ojl.1;RCE1;chr11:66605882-66615882;
chr11:66657413-66726876	69463	chr11	66657413	66662477	chr11	66721279	66726876	5	4.07438e-18	No	Yes	uc001ojo.1;PC;chr11:66720847-66730847;uc001ojp.1;PC;chr11:66720847-66730847;
chr11:66749409-66793269	43860	chr11	66749409	66752439	chr11	66788790	66793269	7	1.67968e-21	No	Yes	uc009yrl.2;SYT12;chr11:66785189-66795189;uc001oju.2;SYT12;chr11:66785890-66795890;
chr11:66760073-66826043	65970	chr11	66760073	66763994	chr11	66824308	66826043	3	1.73682e-10	No	Yes	uc001ojv.2;RHOD;chr11:66819288-66829288;
chr11:66762305-66820862	58557	chr11	66762305	66765818	chr11	66818410	66820862	3	2.30823e-10	No	Yes	uc001ojv.2;RHOD;chr11:66819288-66829288;
chr11:66762967-66792799	29832	chr11	66762967	66768319	chr11	66788576	66792799	9	1.15666e-25	No	Yes	uc009yrl.2;SYT12;chr11:66785189-66795189;uc001oju.2;SYT12;chr11:66785890-66795890;
chr11:66764015-66824249	60234	chr11	66764015	66766435	chr11	66822154	66824249	3	1.76989e-08	No	Yes	uc001ojv.2;RHOD;chr11:66819288-66829288;
chr11:66768926-66792218	23292	chr11	66768926	66771878	chr11	66788224	66792218	4	2.43067e-12	No	Yes	uc009yrl.2;SYT12;chr11:66785189-66795189;uc001oju.2;SYT12;chr11:66785890-66795890;
chr11:66772630-66792271	19641	chr11	66772630	66777861	chr11	66788171	66792271	6	8.36814e-19	No	Yes	uc009yrl.2;SYT12;chr11:66785189-66795189;uc001oju.2;SYT12;chr11:66785890-66795890;
chr11:66798443-67086293	287850	chr11	66798443	66801569	chr11	67083608	67086293	3	2.22888e-08	No	Yes	uc010rpo.1;LOC100130987;chr11:67080309-67090309;
chr11:66830388-66888599	58211	chr11	66830388	66831989	chr11	66886247	66888599	3	2.64861e-11	No	Yes	uc001ojx.2;KIAA1004;chr11:66881739-66891739;uc001ojw.2;KDM2A;chr11:66881739-66891739;
chr11:66843754-66890300	46546	chr11	66843754	66847684	chr11	66886788	66890300	5	4.7188e-15	No	Yes	uc001ojx.2;KIAA1004;chr11:66881739-66891739;uc001ojw.2;KDM2A;chr11:66881739-66891739;
chr11:67853936-67889004	35068	chr11	67853936	67856496	chr11	67886644	67889004	3	4.27464e-12	No	Yes	uc001onj.2;CHKA;chr11:67883858-67893858;uc001onk.2;CHKA;chr11:67883858-67893858;
chr11:68867568-69485325	617757	chr11	68867568	68869894	chr11	69482957	69485325	3	4.30489e-10	No	Yes	uc010rqi.1;ORAOV1;chr11:69485165-69495165;uc001opc.2;ORAOV1;chr11:69485165-69495165;uc009ysm.2;ORAOV1;chr11:69485165-69495165;uc001opd.2;ORAOV1;chr11:69485165-69495165;uc001ope.1;ORAOV1;chr11:69485165-69495165;
chr11:68870849-69062167	191318	chr11	68870849	68873033	chr11	69060093	69062167	3	2.81474e-11	No	Yes	uc001oov.2;MYEOV;chr11:69056621-69066621;uc009ysl.2;MYEOV;chr11:69056621-69066621;uc001oow.2;MYEOV;chr11:69056621-69066621;uc001oox.2;OCIM;chr11:69056621-69066621;
chr11:68873020-69485609	612589	chr11	68873020	68875983	chr11	69483594	69485609	3	4.79516e-10	No	Yes	uc010rqi.1;ORAOV1;chr11:69485165-69495165;uc001opc.2;ORAOV1;chr11:69485165-69495165;uc009ysm.2;ORAOV1;chr11:69485165-69495165;uc001opd.2;ORAOV1;chr11:69485165-69495165;uc001ope.1;ORAOV1;chr11:69485165-69495165;
chr11:68880597-69470969	590372	chr11	68880597	68884582	chr11	69467859	69470969	4	7.43717e-11	No	Yes	uc010rqh.1;AK294004;chr11:69464178-69474178;
chr11:68885091-69490844	605753	chr11	68885091	68888435	chr11	69488721	69490844	3	5.84664e-10	No	Yes	uc010rqi.1;ORAOV1;chr11:69485165-69495165;uc001opc.2;ORAOV1;chr11:69485165-69495165;uc009ysm.2;ORAOV1;chr11:69485165-69495165;uc001opd.2;ORAOV1;chr11:69485165-69495165;uc001ope.1;ORAOV1;chr11:69485165-69495165;
chr11:68885240-69464781	579541	chr11	68885240	68900797	chr11	69451089	69464781	55	0	No	Yes	uc010rqh.1;AK294004;chr11:69464178-69474178;uc001opa.2;CCND1;chr11:69450872-69460872;
chr11:68888922-69471205	582283	chr11	68888922	68893501	chr11	69467851	69471205	6	3.10601e-15	No	Yes	uc010rqh.1;AK294004;chr11:69464178-69474178;
chr11:69041571-69458670	417099	chr11	69041571	69043875	chr11	69455912	69458670	3	1.46937e-08	No	Yes	uc001opa.2;CCND1;chr11:69450872-69460872;
chr11:69044840-69456924	412084	chr11	69044840	69047467	chr11	69453634	69456924	4	4.18139e-11	No	Yes	uc001opa.2;CCND1;chr11:69450872-69460872;
chr11:69047288-69462275	414987	chr11	69047288	69049118	chr11	69458955	69462275	3	1.58613e-09	No	Yes	uc001opa.2;CCND1;chr11:69450872-69460872;
chr11:69048446-69457002	408556	chr11	69048446	69053212	chr11	69453669	69457002	5	5.53347e-13	No	Yes	uc001opa.2;CCND1;chr11:69450872-69460872;
chr11:69085854-69458673	372819	chr11	69085854	69090766	chr11	69454128	69458673	6	1.57969e-16	No	Yes	uc001opa.2;CCND1;chr11:69450872-69460872;
chr11:69177652-69457510	279858	chr11	69177652	69181276	chr11	69454903	69457510	3	6.94581e-09	No	Yes	uc001opa.2;CCND1;chr11:69450872-69460872;
chr11:69256017-69471421	215404	chr11	69256017	69263922	chr11	69467719	69471421	9	1.91776e-23	No	Yes	uc010rqh.1;AK294004;chr11:69464178-69474178;
chr11:69277961-69466339	188378	chr11	69277961	69307540	chr11	69449931	69466339	117	0	No	Yes	uc010rqh.1;AK294004;chr11:69464178-69474178;uc001opa.2;CCND1;chr11:69450872-69460872;
chr11:69291780-69472948	181168	chr11	69291780	69296602	chr11	69469281	69472948	7	6.20723e-17	No	Yes	uc010rqh.1;AK294004;chr11:69464178-69474178;
chr11:69307790-69459076	151286	chr11	69307790	69312324	chr11	69453814	69459076	9	9.06015e-23	No	Yes	uc001opa.2;CCND1;chr11:69450872-69460872;
chr11:69307835-69471458	163623	chr11	69307835	69311329	chr11	69467812	69471458	4	9.04645e-12	No	Yes	uc010rqh.1;AK294004;chr11:69464178-69474178;
chr11:69312425-69462327	149902	chr11	69312425	69323470	chr11	69452035	69462327	19	1.4013e-45	No	Yes	uc001opa.2;CCND1;chr11:69450872-69460872;
chr11:69327343-69471017	143674	chr11	69327343	69331000	chr11	69467860	69471017	3	1.52645e-08	No	Yes	uc010rqh.1;AK294004;chr11:69464178-69474178;
chr11:69353107-69458310	105203	chr11	69353107	69357452	chr11	69452151	69458310	9	2.33712e-24	No	Yes	uc001opa.2;CCND1;chr11:69450872-69460872;
chr11:69388703-69457203	68500	chr11	69388703	69392548	chr11	69453776	69457203	5	4.05481e-15	No	Yes	uc001opa.2;CCND1;chr11:69450872-69460872;
chr11:69400786-69456621	55835	chr11	69400786	69404279	chr11	69452902	69456621	5	1.30126e-14	No	Yes	uc001opa.2;CCND1;chr11:69450872-69460872;
chr11:69412696-69457870	45174	chr11	69412696	69417462	chr11	69451603	69457870	8	3.02533e-22	No	Yes	uc001opa.2;CCND1;chr11:69450872-69460872;
chr11:69417702-69457128	39426	chr11	69417702	69420584	chr11	69454163	69457128	3	5.5719e-09	No	Yes	uc001opa.2;CCND1;chr11:69450872-69460872;
chr11:69430025-69457357	27332	chr11	69430025	69433220	chr11	69453007	69457357	4	2.39293e-11	No	Yes	uc001opa.2;CCND1;chr11:69450872-69460872;
chr11:69940898-69953236	12338	chr11	69940898	69945287	chr11	69950717	69953236	4	4.2787e-18	No	Yes	uc010rqk.1;ANO1;chr11:69949458-69959458;
chr11:70055449-70117421	61972	chr11	70055449	70058444	chr11	70114904	70117421	3	6.1342e-09	No	Yes	uc001opn.1;PPFIA1;chr11:70111822-70121822;uc001opo.2;PPFIA1;chr11:70111822-70121822;uc001opp.2;PPFIA1;chr11:70111822-70121822;
chr11:70078315-70118377	40062	chr11	70078315	70079888	chr11	70114998	70118377	3	2.24578e-09	No	Yes	uc001opn.1;PPFIA1;chr11:70111822-70121822;uc001opo.2;PPFIA1;chr11:70111822-70121822;uc001opp.2;PPFIA1;chr11:70111822-70121822;
chr11:70081586-70118195	36609	chr11	70081586	70085781	chr11	70115335	70118195	4	6.00784e-13	No	Yes	uc001opn.1;PPFIA1;chr11:70111822-70121822;uc001opo.2;PPFIA1;chr11:70111822-70121822;uc001opp.2;PPFIA1;chr11:70111822-70121822;
chr11:70087544-70118245	30701	chr11	70087544	70090309	chr11	70115498	70118245	3	2.14004e-09	No	Yes	uc001opn.1;PPFIA1;chr11:70111822-70121822;uc001opo.2;PPFIA1;chr11:70111822-70121822;uc001opp.2;PPFIA1;chr11:70111822-70121822;
chr11:70090577-70119580	29003	chr11	70090577	70096170	chr11	70112992	70119580	11	5.5483e-34	No	Yes	uc001opn.1;PPFIA1;chr11:70111822-70121822;uc001opo.2;PPFIA1;chr11:70111822-70121822;uc001opp.2;PPFIA1;chr11:70111822-70121822;
chr11:70096927-70117435	20508	chr11	70096927	70100445	chr11	70114596	70117435	4	1.26699e-13	No	Yes	uc001opn.1;PPFIA1;chr11:70111822-70121822;uc001opo.2;PPFIA1;chr11:70111822-70121822;uc001opp.2;PPFIA1;chr11:70111822-70121822;
chr11:71738561-71791832	53271	chr11	71738561	71741473	chr11	71789951	71791832	3	8.35095e-12	No	Yes	uc001ork.1;NUMA1;chr11:71786520-71796520;uc001oro.1;NUMA1;chr11:71786520-71796520;uc001orl.1;NUMA1;chr11:71786573-71796573;uc001orm.1;NUMA1;chr11:71786573-71796573;uc001orq.2;NUMA1;chr11:71786573-71796573;uc009ysz.2;LRTOMT;chr11:71786381-71796381;uc001orr.2;LRTOMT;chr11:71786381-71796381;uc010rqs.1;LRTOMT;chr11:71786381-71796381;uc010rqt.1;LRTOMT;chr11:71786381-71796381;uc010rqu.1;LRTOMT;chr11:71…
chr11:71911826-71936470	24644	chr11	71911826	71915814	chr11	71931588	71936470	5	3.8904e-17	No	Yes	uc009ytd.2;FOLR2;chr11:71922818-71932818;uc009yte.2;FOLR2;chr11:71922818-71932818;uc001ose.3;FOLR2;chr11:71922818-71932818;uc009ytf.2;FOLR2;chr11:71922818-71932818;uc001osf.2;INPPL1;chr11:71930881-71940881;uc001osg.2;INPPL1;chr11:71933924-71943924;
chr11:72802747-72855153	52406	chr11	72802747	72806811	chr11	72852482	72855153	3	4.71751e-11	No	Yes	uc001oti.2;FCHSD2;chr11:72846173-72856173;uc009ytl.2;FCHSD2;chr11:72848143-72858143;uc010rrg.1;KIAA0769;chr11:72848143-72858143;uc001oth.3;FCHSD2;chr11:72848143-72858143;
chr11:72893314-72955285	61971	chr11	72893314	72909448	chr11	72922899	72955285	117	0	No	Yes	uc001otj.2;P2RY2;chr11:72924343-72934343;uc001otk.2;P2RY2;chr11:72924343-72934343;uc001otl.2;P2RY2;chr11:72924501-72934501;
chr11:73006048-73015047	8999	chr11	73006048	73010215	chr11	73011850	73015047	4	2.02568e-16	No	Yes	uc001otu.2;ARHGEF17;chr11:73014662-73024662;
chr11:73046247-73089098	42851	chr11	73046247	73049825	chr11	73086101	73089098	3	2.73095e-10	No	Yes	uc001otv.2;RELT;chr11:73082404-73092404;uc001otw.2;RELT;chr11:73082712-73092712;
chr11:73296523-73311638	15115	chr11	73296523	73298839	chr11	73307777	73311638	3	7.31124e-13	No	Yes	uc001oty.1;FAM168A;chr11:73304228-73314228;uc001otz.1;FAM168A;chr11:73304228-73314228;uc009ytp.1;FAM168A;chr11:73304228-73314228;
chr11:73371264-73472543	101279	chr11	73371264	73374255	chr11	73470720	73472543	3	2.22345e-10	No	Yes	uc001oue.2;RAB6A;chr11:73467201-73477201;uc001ouf.2;RAB6A;chr11:73467201-73477201;uc009yts.2;RAB6A;chr11:73467201-73477201;uc001oug.2;RAB6C;chr11:73467201-73477201;
chr11:73780866-73802078	21212	chr11	73780866	73784002	chr11	73798180	73802078	6	7.33046e-24	No	Yes	uc001out.2;DKFZp586P0123;chr11:73791931-73801931;
chr11:74097699-74105838	8139	chr11	74097699	74100088	chr11	74103636	74105838	4	1.84334e-18	No	Yes	uc001ovb.1;PGM2L1;chr11:74104502-74114502;
chr11:75086132-75111188	25056	chr11	75086132	75088221	chr11	75109125	75111188	3	4.06121e-11	No	Yes	uc001owj.1;SNORD15A;chr11:75106434-75116434;uc001owg.2;RPS3;chr11:75105561-75115561;uc001owl.1;SNORD15B;chr11:75110464-75120464;uc001owk.1;RPS3;chr11:75106737-75116737;uc001owh.2;RPS3;chr11:75105561-75115561;uc001owi.2;RPS3;chr11:75105561-75115561;
chr11:76124379-76157468	33089	chr11	76124379	76127388	chr11	76154738	76157468	3	4.5765e-11	No	Yes	uc001oxj.2;EMSY;chr11:76151068-76161068;uc001oxk.2;EMSY;chr11:76151068-76161068;uc009yuj.1;C11orf30;chr11:76151068-76161068;uc010rsa.1;C11orf30;chr11:76151068-76161068;uc001oxl.2;C11orf30;chr11:76151068-76161068;uc001oxm.2;C11orf30;chr11:76151068-76161068;uc010rsb.1;C11orf30;chr11:76152943-76162943;uc010rsc.1;C11orf30;chr11:76152943-76162943;uc001oxn.2;C11orf30;chr11:76152943-76162943;uc010rsd.1;…
chr11:79130470-79152873	22403	chr11	79130470	79132108	chr11	79149073	79152873	3	2.07748e-13	No	Yes	uc001ozl.3;ODZ4;chr11:79146695-79156695;
chr11:82715179-82785618	70439	chr11	82715179	82719084	chr11	82781913	82785618	6	3.81641e-20	No	Yes	uc001ozu.2;RAB30;chr11:82777884-82787884;uc010rst.1;RAB30;chr11:82777884-82787884;uc001ozv.2;DKFZp686J07132;chr11:82777884-82787884;uc001ozw.2;BC031316;chr11:82778118-82788118;
chr11:82755672-82784363	28691	chr11	82755672	82757667	chr11	82781476	82784363	3	5.81364e-11	No	Yes	uc001ozu.2;RAB30;chr11:82777884-82787884;uc010rst.1;RAB30;chr11:82777884-82787884;uc001ozv.2;DKFZp686J07132;chr11:82777884-82787884;uc001ozw.2;BC031316;chr11:82778118-82788118;
chr11:85456923-85523482	66559	chr11	85456923	85462918	chr11	85517727	85523482	9	1.10329e-25	No	Yes	uc010rti.1;SYTL2;chr11:85517178-85527178;uc010rtj.1;SYTL2;chr11:85517178-85527178;
chr11:85494490-85519342	24852	chr11	85494490	85496333	chr11	85515737	85519342	3	5.25084e-11	No	Yes	uc010rti.1;SYTL2;chr11:85517178-85527178;uc010rtj.1;SYTL2;chr11:85517178-85527178;
chr11:85498273-85522661	24388	chr11	85498273	85503366	chr11	85519717	85522661	4	9.76624e-12	No	Yes	uc010rti.1;SYTL2;chr11:85517178-85527178;uc010rtj.1;SYTL2;chr11:85517178-85527178;
chr11:85539212-85567550	28338	chr11	85539212	85541786	chr11	85564871	85567550	4	4.87624e-13	No	Yes	uc001pbg.1;CCDC83;chr11:85561143-85571143;uc001pbh.1;CCDC83;chr11:85561143-85571143;
chr11:85553949-85567553	13604	chr11	85553949	85557231	chr11	85564538	85567553	4	1.44652e-13	No	Yes	uc001pbg.1;CCDC83;chr11:85561143-85571143;uc001pbh.1;CCDC83;chr11:85561143-85571143;
chr11:85554468-85564178	9710	chr11	85554468	85557167	chr11	85560907	85564178	3	2.63433e-11	No	Yes	uc001pbg.1;CCDC83;chr11:85561143-85571143;uc001pbh.1;CCDC83;chr11:85561143-85571143;
chr11:85988589-86014715	26126	chr11	85988589	85992349	chr11	86011811	86014715	3	1.69113e-11	No	Yes	uc001pbt.2;C11orf73;chr11:86008252-86018252;uc010rto.1;C11orf73;chr11:86008252-86018252;uc001pbu.2;C11orf73;chr11:86008252-86018252;uc010rtp.1;C11orf73;chr11:86008252-86018252;uc001pbv.2;C11orf73;chr11:86009397-86019397;
chr11:86168596-86516301	347705	chr11	86168596	86172615	chr11	86512849	86516301	3	1.80537e-10	No	Yes	uc010rts.1;PRSS23;chr11:86506490-86516490;uc001pcb.2;PRSS23;chr11:86506490-86516490;uc001pcc.1;ZSIG13;chr11:86506490-86516490;
chr11:86318121-86512612	194491	chr11	86318121	86320638	chr11	86509827	86512612	4	7.83352e-14	No	Yes	uc010rts.1;PRSS23;chr11:86506490-86516490;uc001pcb.2;PRSS23;chr11:86506490-86516490;uc001pcc.1;ZSIG13;chr11:86506490-86516490;
chr11:86332654-86513422	180768	chr11	86332654	86334569	chr11	86510961	86513422	3	6.12383e-11	No	Yes	uc010rts.1;PRSS23;chr11:86506490-86516490;uc001pcb.2;PRSS23;chr11:86506490-86516490;uc001pcc.1;ZSIG13;chr11:86506490-86516490;
chr11:86340979-86513314	172335	chr11	86340979	86344434	chr11	86510091	86513314	6	2.94139e-20	No	Yes	uc010rts.1;PRSS23;chr11:86506490-86516490;uc001pcb.2;PRSS23;chr11:86506490-86516490;uc001pcc.1;ZSIG13;chr11:86506490-86516490;
chr11:86414005-86514510	100505	chr11	86414005	86419352	chr11	86508550	86514510	10	3.40685e-31	No	Yes	uc010rts.1;PRSS23;chr11:86506490-86516490;uc001pcb.2;PRSS23;chr11:86506490-86516490;uc001pcc.1;ZSIG13;chr11:86506490-86516490;
chr11:86450401-86516006	65605	chr11	86450401	86454128	chr11	86509734	86516006	8	2.80344e-23	No	Yes	uc010rts.1;PRSS23;chr11:86506490-86516490;uc001pcb.2;PRSS23;chr11:86506490-86516490;uc001pcc.1;ZSIG13;chr11:86506490-86516490;
chr11:86457948-86514015	56067	chr11	86457948	86461057	chr11	86510735	86514015	4	3.3588e-13	No	Yes	uc010rts.1;PRSS23;chr11:86506490-86516490;uc001pcb.2;PRSS23;chr11:86506490-86516490;uc001pcc.1;ZSIG13;chr11:86506490-86516490;
chr11:86483713-86514607	30894	chr11	86483713	86491421	chr11	86509174	86514607	12	1.01575e-35	No	Yes	uc010rts.1;PRSS23;chr11:86506490-86516490;uc001pcb.2;PRSS23;chr11:86506490-86516490;uc001pcc.1;ZSIG13;chr11:86506490-86516490;
chr11:94736812-94802190	65378	chr11	94736812	94740297	chr11	94798887	94802190	4	9.81699e-18	No	Yes	uc001pfg.1;CR611239;chr11:94796100-94806100;uc001pff.2;SFRS2B;chr11:94795055-94805055;
chr11:107689319-107730113	40794	chr11	107689319	107691586	chr11	107728240	107730113	3	8.80699e-14	No	Yes	uc010rvu.1;SLC35F2;chr11:107724680-107734680;uc001pjs.2;SLC35F2;chr11:107724680-107734680;uc001pjq.2;SLC35F2;chr11:107724914-107734914;
chr11:107709816-107729677	19861	chr11	107709816	107713345	chr11	107727610	107729677	4	2.86658e-17	No	Yes	uc010rvu.1;SLC35F2;chr11:107724680-107734680;uc001pjs.2;SLC35F2;chr11:107724680-107734680;uc001pjq.2;SLC35F2;chr11:107724914-107734914;
chr11:110119604-110169599	49995	chr11	110119604	110121828	chr11	110167434	110169599	3	2.77679e-11	No	Yes	uc009yxx.1;RDX;chr11:110162437-110172437;uc009yxy.2;RDX;chr11:110162437-110172437;uc009yxz.2;RDX;chr11:110162437-110172437;uc009yya.2;RDX;chr11:110162437-110172437;uc001pku.2;RDX;chr11:110162437-110172437;uc010rwe.1;RDX;chr11:110162437-110172437;
chr11:110180470-110203955	23485	chr11	110180470	110183527	chr11	110202107	110203955	3	1.10564e-13	No	Yes	uc001pkv.1;AK124179;chr11:110194129-110204129;
chr11:110181153-110228037	46884	chr11	110181153	110184976	chr11	110224504	110228037	4	4.57665e-15	No	Yes	uc001pkw.1;AK094117;chr11:110220919-110230919;
chr11:113629635-113645244	15609	chr11	113629635	113633172	chr11	113642864	113645244	3	7.1545e-14	No	Yes	uc001poe.2;ZW10;chr11:113639425-113649425;uc009yyv.2;ZW10;chr11:113639425-113649425;
chr11:113731922-113747836	15914	chr11	113731922	113735257	chr11	113744625	113747836	4	2.15721e-18	No	Yes	uc001poh.2;USP28;chr11:113741256-113751256;uc010rwy.1;KIAA1515;chr11:113741256-113751256;uc001poi.2;KIAA1515;chr11:113741256-113751256;uc001poj.3;USP28;chr11:113741256-113751256;uc010rwz.1;USP28;chr11:113741256-113751256;
chr11:115359577-115375168	15591	chr11	115359577	115362026	chr11	115372569	115375168	3	6.01674e-13	No	Yes	uc001ppf.3;CADM1;chr11:115370241-115380241;uc001ppi.3;CADM1;chr11:115370241-115380241;uc001ppk.3;CADM1;chr11:115370241-115380241;uc001ppj.3;CADM1;chr11:115370241-115380241;uc001ppl.2;CADM1;chr11:115370241-115380241;
chr11:117777663-117800188	22525	chr11	117777663	117781309	chr11	117797755	117800188	3	3.68649e-12	No	Yes	uc001prs.1;TMPRSS13;chr11:117795115-117805115;uc001pru.1;TMPRSS13;chr11:117795115-117805115;
chr11:118490037-118783428	293391	chr11	118490037	118491900	chr11	118780364	118783428	3	1.49121e-08	No	Yes	uc001pug.2;BCL9L;chr11:118776613-118786613;uc009zal.2;BCL9L;chr11:118776613-118786613;
chr11:118559308-118782906	223598	chr11	118559308	118562338	chr11	118779940	118782906	3	1.31032e-08	No	Yes	uc001pug.2;BCL9L;chr11:118776613-118786613;uc009zal.2;BCL9L;chr11:118776613-118786613;
chr11:118564878-118784606	219728	chr11	118564878	118568078	chr11	118780835	118784606	4	7.01005e-12	No	Yes	uc001pug.2;BCL9L;chr11:118776613-118786613;uc009zal.2;BCL9L;chr11:118776613-118786613;
chr11:118573942-118784939	210997	chr11	118573942	118577338	chr11	118782465	118784939	3	4.17039e-10	No	Yes	uc001pug.2;BCL9L;chr11:118776613-118786613;uc009zal.2;BCL9L;chr11:118776613-118786613;
chr11:118740558-118782072	41514	chr11	118740558	118744188	chr11	118779066	118782072	3	2.938e-08	No	Yes	uc001pug.2;BCL9L;chr11:118776613-118786613;uc009zal.2;BCL9L;chr11:118776613-118786613;
chr11:118791335-118870957	79622	chr11	118791335	118793613	chr11	118867503	118870957	3	9.48715e-08	No	Yes	uc001pum.2;RPL23AP64;chr11:118869303-118879303;uc001pul.2;CCDC84;chr11:118863851-118873851;uc010ryk.1;DLNB14;chr11:118863851-118873851;uc010ryl.1;DLNB14;chr11:118863851-118873851;uc010rym.1;DLNB14;chr11:118863851-118873851;
chr11:118792567-118829073	36506	chr11	118792567	118794869	chr11	118824795	118829073	4	8.6698e-11	No	Yes	uc001puh.2;UPK2;chr11:118822025-118832025;
chr11:118795047-118829038	33991	chr11	118795047	118798549	chr11	118824729	118829038	5	1.83025e-13	No	Yes	uc001puh.2;UPK2;chr11:118822025-118832025;
chr11:118798878-118889467	90589	chr11	118798878	118801855	chr11	118887072	118889467	3	2.92277e-07	No	Yes	uc001pun.2;RPS25;chr11:118884057-118894057;uc010ryn.1;TRAPPC4;chr11:118884240-118894240;uc010ryo.1;TRAPPC4;chr11:118884240-118894240;uc010ryp.1;TRAPPC4;chr11:118884240-118894240;uc001pup.2;TRAPPC4;chr11:118884240-118894240;uc010ryq.1;hCG_38438;chr11:118884240-118894240;
chr11:118799117-118829028	29911	chr11	118799117	118801778	chr11	118825830	118829028	8	2.99847e-23	No	Yes	uc001puh.2;UPK2;chr11:118822025-118832025;
chr11:118816365-118828552	12187	chr11	118816365	118819797	chr11	118825387	118828552	3	1.84652e-11	No	Yes	uc001puh.2;UPK2;chr11:118822025-118832025;
chr11:119536475-119601129	64654	chr11	119536475	119542158	chr11	119597745	119601129	5	1.55525e-19	No	Yes	uc001pwu.1;PVRL1;chr11:119594435-119604435;uc001pwv.2;PVRL1;chr11:119594435-119604435;uc001pww.2;PVRL1;chr11:119594435-119604435;
chr11:119548530-119602607	54077	chr11	119548530	119557660	chr11	119596856	119602607	12	1.84061e-41	No	Yes	uc001pwu.1;PVRL1;chr11:119594435-119604435;uc001pwv.2;PVRL1;chr11:119594435-119604435;uc001pww.2;PVRL1;chr11:119594435-119604435;
chr11:119578331-119601327	22996	chr11	119578331	119580613	chr11	119597735	119601327	3	9.64607e-13	No	Yes	uc001pwu.1;PVRL1;chr11:119594435-119604435;uc001pwv.2;PVRL1;chr11:119594435-119604435;uc001pww.2;PVRL1;chr11:119594435-119604435;
chr11:119590103-119600251	10148	chr11	119590103	119594091	chr11	119595863	119600251	5	3.63852e-19	No	Yes	uc001pwu.1;PVRL1;chr11:119594435-119604435;uc001pwv.2;PVRL1;chr11:119594435-119604435;uc001pww.2;PVRL1;chr11:119594435-119604435;
chr11:121120979-121167264	46285	chr11	121120979	121124837	chr11	121162716	121167264	4	2.59793e-16	No	Yes	uc001pxs.1;C5D;chr11:121158387-121168387;uc001pxt.2;SC5DL;chr11:121158387-121168387;uc001pxu.2;SC5DL;chr11:121158387-121168387;uc001pxv.2;SC5DL;chr11:121158576-121168576;
chr11:125298058-125463056	164998	chr11	125298058	125300466	chr11	125460754	125463056	3	1.86757e-12	No	Yes	uc009zbm.2;STT3A;chr11:125457738-125467738;uc001qcd.2;STT3A;chr11:125457738-125467738;uc001qce.2;STT3A;chr11:125457738-125467738;uc010sbg.1;STT3A;chr11:125457738-125467738;
chr11:125308126-125463007	154881	chr11	125308126	125311301	chr11	125460504	125463007	3	4.24534e-13	No	Yes	uc009zbm.2;STT3A;chr11:125457738-125467738;uc001qcd.2;STT3A;chr11:125457738-125467738;uc001qce.2;STT3A;chr11:125457738-125467738;uc010sbg.1;STT3A;chr11:125457738-125467738;
chr11:126209221-126275370	66149	chr11	126209221	126212333	chr11	126273324	126275370	3	8.48538e-12	No	Yes	uc009zce.2;ST3GAL4;chr11:126270981-126280981;uc001qdw.2;ST3GAL4;chr11:126271089-126281089;uc001qdy.2;ST3GAL4;chr11:126271703-126281703;uc001qdz.2;ST3GAL4;chr11:126272128-126282128;uc001qdx.1;ST3GAL4;chr11:126271367-126281367;
chr11:126251705-126276131	24426	chr11	126251705	126256260	chr11	126271660	126276131	7	3.31454e-26	No	Yes	uc009zce.2;ST3GAL4;chr11:126270981-126280981;uc001qdw.2;ST3GAL4;chr11:126271089-126281089;uc001qdy.2;ST3GAL4;chr11:126271703-126281703;uc001qdz.2;ST3GAL4;chr11:126272128-126282128;uc001qdx.1;ST3GAL4;chr11:126271367-126281367;
chr12:1626153-1686746	60593	chr12	1626153	1629399	chr12	1683454	1686746	3	2.80548e-12	No	Yes	uc009zdq.2;WNT5B;chr12:1678822-1688822;
chr12:1764396-1802362	37966	chr12	1764396	1766319	chr12	1799382	1802362	3	1.06787e-11	No	Yes	uc001qjm.2;ADIPOR2;chr12:1795246-1805246;uc001qjn.2;ADIPOR2;chr12:1795260-1805260;
chr12:1947643-1959557	11914	chr12	1947643	1951345	chr12	1957413	1959557	3	3.88874e-13	No	Yes	uc009zdr.1;CACNA2D4;chr12:1958210-1968210;
chr12:2792700-2802035	9335	chr12	2792700	2794907	chr12	2799070	2802035	3	2.60706e-14	No	Yes	uc001qkx.1;AK093746;chr12:2795284-2805284;
chr12:3972450-3983815	11365	chr12	3972450	3975952	chr12	3981759	3983815	3	6.86491e-13	No	Yes	uc001qml.2;PARP11;chr12:3977608-3987608;uc009zef.2;C12orf6;chr12:3977608-3987608;uc001qmm.2;PARP11;chr12:3977608-3987608;uc001qmn.2;PARP11;chr12:3977608-3987608;
chr12:4416036-4435879	19843	chr12	4416036	4419035	chr12	4433852	4435879	3	1.28253e-13	No	Yes	uc001qmp.2;C12orf5;chr12:4425358-4435358;
chr12:6175198-6311866	136668	chr12	6175198	6180422	chr12	6308425	6311866	5	3.74006e-16	No	Yes	uc001qnp.1;CD9;chr12:6303872-6313872;uc010seu.1;BTCC-1;chr12:6304554-6314554;uc010sev.1;5H9;chr12:6304554-6314554;uc001qnq.1;CD9;chr12:6304554-6314554;
chr12:6181205-6311858	130653	chr12	6181205	6184796	chr12	6307172	6311858	4	2.57175e-13	No	Yes	uc001qnp.1;CD9;chr12:6303872-6313872;uc010seu.1;BTCC-1;chr12:6304554-6314554;uc010sev.1;5H9;chr12:6304554-6314554;uc001qnq.1;CD9;chr12:6304554-6314554;
chr12:6385982-6423478	37496	chr12	6385982	6389587	chr12	6419736	6423478	5	4.3085e-15	No	Yes	uc001qnr.2;PLEKHG6;chr12:6414601-6424601;uc001qns.2;PLEKHG6;chr12:6414903-6424903;uc010sew.1;PLEKHG6;chr12:6415098-6425098;uc010sex.1;PLEKHG6;chr12:6416816-6426816;
chr12:6405650-6414929	9279	chr12	6405650	6408487	chr12	6412396	6414929	3	9.00318e-15	No	Yes	uc001qnr.2;PLEKHG6;chr12:6414601-6424601;uc001qns.2;PLEKHG6;chr12:6414903-6424903;
chr12:6609429-6646940	37511	chr12	6609429	6612149	chr12	6642825	6646940	5	1.03964e-15	No	Yes	uc001qop.1;GAPDH;chr12:6638656-6648656;uc009zep.1;GAPD;chr12:6638656-6648656;uc001qoq.1;GAPDH;chr12:6638656-6648656;uc001qor.1;GAPDH;chr12:6638656-6648656;uc001qos.1;GAPDH;chr12:6638699-6648699;uc001qot.1;GAPDH;chr12:6638957-6648957;uc001qou.1;GAPDH;chr12:6638957-6648957;uc001qov.1;GAPDH;chr12:6639467-6649467;uc001qow.1;GAPD;chr12:6640828-6650828;uc001qox.1;GAPDH;chr12:6641452-6651452;
chr12:9043152-9067722	24570	chr12	9043152	9045198	chr12	9065013	9067722	3	2.44289e-14	No	Yes	uc001qvc.1;PHC1;chr12:9062315-9072315;uc010sgn.1;PHC1;chr12:9062315-9072315;uc001qvd.2;PHC1;chr12:9062315-9072315;uc001qve.2;PHC1;chr12:9062315-9072315;
chr12:12329160-12422512	93352	chr12	12329160	12332545	chr12	12419382	12422512	4	8.5028e-16	No	Yes	uc001rah.3;LRP6;chr12:12414811-12424811;uc010shl.1;LRP6;chr12:12414811-12424811;
chr12:12531370-12717276	185906	chr12	12531370	12534398	chr12	12711544	12717276	8	1.08965e-27	No	Yes	uc001rao.1;DUSP16;chr12:12710317-12720317;
chr12:12547827-12715530	167703	chr12	12547827	12551024	chr12	12713596	12715530	3	2.72833e-10	No	Yes	uc001rao.1;DUSP16;chr12:12710317-12720317;
chr12:12550464-12625480	75016	chr12	12550464	12553838	chr12	12621141	12625480	5	1.69236e-20	No	Yes	uc001ram.1;AX748225;chr12:12624731-12634731;
chr12:12603843-12714793	110950	chr12	12603843	12606415	chr12	12711459	12714793	4	8.13341e-14	No	Yes	uc001rao.1;DUSP16;chr12:12710317-12720317;
chr12:12618969-12717041	98072	chr12	12618969	12622557	chr12	12713241	12717041	4	2.11808e-12	No	Yes	uc001rao.1;DUSP16;chr12:12710317-12720317;
chr12:12688605-12764846	76241	chr12	12688605	12691536	chr12	12762054	12764846	3	2.33459e-12	No	Yes	uc001rap.1;CREBL2;chr12:12759830-12769830;
chr12:12727279-12878396	151117	chr12	12727279	12730507	chr12	12875210	12878396	3	7.98638e-10	No	Yes	uc001rat.2;CDKN1B;chr12:12865301-12875301;uc001rau.3;APOLD1;chr12:12873850-12883850;uc001rav.2;DDX47;chr12:12873850-12883850;
chr12:12735835-12872034	136199	chr12	12735835	12737733	chr12	12870249	12872034	3	2.71677e-10	No	Yes	uc001rat.2;CDKN1B;chr12:12865301-12875301;
chr12:12948916-12961386	12470	chr12	12948916	12955132	chr12	12952361	12961386	11	7.73902e-39	No	Yes	uc010shn.1;APOLD1;chr12:12961140-12971140;uc009zhw.1;DDX47;chr12:12961140-12971140;uc001rax.2;DDX47;chr12:12961140-12971140;uc001ray.2;DDX47;chr12:12961140-12971140;
chr12:12954951-13046680	91729	chr12	12954951	12960307	chr12	13042204	13046680	12	3.50299e-34	No	Yes	uc001raz.2;GPRC5A;chr12:13038955-13048955;uc001rba.2;GPRC5A;chr12:13038955-13048955;
chr12:12977446-13045845	68399	chr12	12977446	12979808	chr12	13043556	13045845	3	1.15649e-10	No	Yes	uc001raz.2;GPRC5A;chr12:13038955-13048955;uc001rba.2;GPRC5A;chr12:13038955-13048955;
chr12:12983299-13050011	66712	chr12	12983299	12993033	chr12	13039335	13050011	33	0	No	Yes	uc001raz.2;GPRC5A;chr12:13038955-13048955;uc001rba.2;GPRC5A;chr12:13038955-13048955;
chr12:12988464-13032336	43872	chr12	12988464	12992806	chr12	13027438	13032336	5	7.56882e-18	No	Yes	uc010sho.1;RPL13AP20;chr12:13023410-13033410;
chr12:13323507-13348295	24788	chr12	13323507	13327403	chr12	13345383	13348295	4	5.55699e-19	No	Yes	uc010shr.1;EMP1;chr12:13344601-13354601;uc001rbr.2;EMP1;chr12:13344601-13354601;uc009zhy.2;EMP1;chr12:13344601-13354601;
chr12:13341076-13349806	8730	chr12	13341076	13344341	chr12	13346152	13349806	3	5.98295e-14	No	Yes	uc010shr.1;EMP1;chr12:13344601-13354601;uc001rbr.2;EMP1;chr12:13344601-13354601;uc009zhy.2;EMP1;chr12:13344601-13354601;
chr12:14360374-14924351	563977	chr12	14360374	14362511	chr12	14922572	14924351	3	4.73703e-09	No	Yes	uc001rce.2;BC020884;chr12:14919065-14929065;uc001rcf.3;HIST4H4;chr12:14919065-14929065;uc001rch.3;H2AFJ;chr12:14922269-14932269;uc009zia.2;H2AFJ;chr12:14922269-14932269;
chr12:14391451-14519449	127998	chr12	14391451	14394576	chr12	14516834	14519449	5	9.61115e-19	No	Yes	uc010shs.1;ATF7IP;chr12:14513610-14523610;uc001rbu.2;ATF7IP;chr12:14513610-14523610;uc001rbv.1;ATF7IP;chr12:14513610-14523610;uc001rbw.2;ATF7IP;chr12:14513610-14523610;uc001rbx.2;ATF7IP;chr12:14513610-14523610;
chr12:14874038-14925382	51344	chr12	14874038	14878329	chr12	14917939	14925382	9	1.91844e-29	No	Yes	uc001rce.2;BC020884;chr12:14919065-14929065;uc001rcf.3;HIST4H4;chr12:14919065-14929065;uc001rch.3;H2AFJ;chr12:14922269-14932269;uc009zia.2;H2AFJ;chr12:14922269-14932269;
chr12:14897753-14924401	26648	chr12	14897753	14903448	chr12	14919983	14924401	10	6.21886e-31	No	Yes	uc001rce.2;BC020884;chr12:14919065-14929065;uc001rcf.3;HIST4H4;chr12:14919065-14929065;uc001rch.3;H2AFJ;chr12:14922269-14932269;uc009zia.2;H2AFJ;chr12:14922269-14932269;
chr12:15305296-15369894	64598	chr12	15305296	15307584	chr12	15366532	15369894	4	3.46685e-16	No	Yes	uc001rcs.2;RERG;chr12:15365563-15375563;uc001rct.2;RERG;chr12:15369304-15379304;uc010shu.1;RERG;chr12:15369304-15379304;
chr12:15331956-15375533	43577	chr12	15331956	15334741	chr12	15372500	15375533	3	1.23993e-11	No	Yes	uc001rcs.2;RERG;chr12:15365563-15375563;uc001rct.2;RERG;chr12:15369304-15379304;uc010shu.1;RERG;chr12:15369304-15379304;
chr12:15336521-15372108	35587	chr12	15336521	15338350	chr12	15368782	15372108	4	1.15387e-16	No	Yes	uc001rcs.2;RERG;chr12:15365563-15375563;uc001rct.2;RERG;chr12:15369304-15379304;uc010shu.1;RERG;chr12:15369304-15379304;
chr12:15907911-15943064	35153	chr12	15907911	15911843	chr12	15940710	15943064	5	1.43887e-18	No	Yes	uc001rdb.2;EPS8;chr12:15937510-15947510;uc009zig.2;EPS8;chr12:15937510-15947510;
chr12:15923684-15944123	20439	chr12	15923684	15926834	chr12	15939871	15944123	6	7.59306e-23	No	Yes	uc001rdb.2;EPS8;chr12:15937510-15947510;uc009zig.2;EPS8;chr12:15937510-15947510;
chr12:15927030-15942389	15359	chr12	15927030	15930735	chr12	15938501	15942389	5	3.75073e-19	No	Yes	uc001rdb.2;EPS8;chr12:15937510-15947510;uc009zig.2;EPS8;chr12:15937510-15947510;
chr12:16281090-16502312	221222	chr12	16281090	16284139	chr12	16499445	16502312	3	1.73357e-11	No	Yes	uc001rdf.2;MGST1;chr12:16495075-16505075;uc001rdg.2;MGST1;chr12:16495578-16505578;uc009zih.1;MGST1;chr12:16495578-16505578;uc001rdh.2;MGST1;chr12:16495711-16505711;uc001rdi.2;MGST1;chr12:16501350-16511350;
chr12:16346882-16503508	156626	chr12	16346882	16349546	chr12	16500626	16503508	3	8.18557e-12	No	Yes	uc001rdf.2;MGST1;chr12:16495075-16505075;uc001rdg.2;MGST1;chr12:16495578-16505578;uc009zih.1;MGST1;chr12:16495578-16505578;uc001rdh.2;MGST1;chr12:16495711-16505711;uc001rdi.2;MGST1;chr12:16501350-16511350;
chr12:27325570-27401139	75569	chr12	27325570	27331155	chr12	27396761	27401139	6	1.77601e-20	No	Yes	uc001rhr.2;STK38L;chr12:27392077-27402077;uc001rhs.2;KIAA0965;chr12:27392077-27402077;uc010sjm.1;STK38L;chr12:27392077-27402077;
chr12:27331234-27399139	67905	chr12	27331234	27337805	chr12	27395549	27399139	9	1.12356e-28	No	Yes	uc001rhr.2;STK38L;chr12:27392077-27402077;uc001rhs.2;KIAA0965;chr12:27392077-27402077;uc010sjm.1;STK38L;chr12:27392077-27402077;
chr12:27343772-27399426	55654	chr12	27343772	27345967	chr12	27395896	27399426	6	1.5452e-20	No	Yes	uc001rhr.2;STK38L;chr12:27392077-27402077;uc001rhs.2;KIAA0965;chr12:27392077-27402077;uc010sjm.1;STK38L;chr12:27392077-27402077;
chr12:27575157-27678563	103406	chr12	27575157	27578992	chr12	27673598	27678563	5	5.74613e-19	No	Yes	uc001rhy.1;PPFIBP1;chr12:27672044-27682044;uc001rhz.1;PPFIBP1;chr12:27672044-27682044;uc010sjr.1;PPFIBP1;chr12:27672044-27682044;uc001rib.1;PPFIBP1;chr12:27672044-27682044;uc001ric.1;PPFIBP1;chr12:27672044-27682044;uc001ria.2;PPFIBP1;chr12:27672044-27682044;uc001rid.1;PPFIBP1;chr12:27672044-27682044;
chr12:27899635-27934141	34506	chr12	27899635	27902192	chr12	27931737	27934141	3	8.88077e-12	No	Yes	uc001rij.2;KLHDC5;chr12:27928186-27938186;uc009zjj.2;KIAA1340;chr12:27928186-27938186;
chr12:39757176-39838507	81331	chr12	39757176	39762110	chr12	39835391	39838507	4	6.13097e-14	No	Yes	uc001rlx.2;KIF21A;chr12:39831918-39841918;uc001rly.2;KIF21A;chr12:39831918-39841918;uc001rlz.2;KIF21A;chr12:39831918-39841918;uc010skl.1;KIF21A;chr12:39831918-39841918;uc001rma.1;KIF21A;chr12:39831918-39841918;
chr12:42691640-42721156	29516	chr12	42691640	42695316	chr12	42718541	42721156	4	8.95652e-17	No	Yes	uc001rmz.2;ZCRB1;chr12:42714932-42724932;uc001rna.2;PPHLN1;chr12:42714946-42724946;uc001rne.2;PPHLN1;chr12:42714946-42724946;uc001rnb.2;PPHLN1;chr12:42714946-42724946;uc001rnd.2;PPHLN1;chr12:42714946-42724946;uc001rnc.2;PPHLN1;chr12:42714946-42724946;uc001rnf.2;PPHLN1;chr12:42714946-42724946;uc010skq.1;PPHLN1;chr12:42714946-42724946;uc010skr.1;PPHLN1;chr12:42714946-42724946;uc001rng.1;PPHLN1;chr1…
chr12:44177860-44201268	23408	chr12	44177860	44183377	chr12	44197477	44201268	5	3.79272e-18	No	Yes	uc001rnz.2;TWF1;chr12:44195048-44205048;uc001roa.2;TWF1;chr12:44195178-44205178;uc001rob.2;TWF1;chr12:44195178-44205178;uc001roc.2;TWF1;chr12:44195178-44205178;
chr12:44205963-44231995	26032	chr12	44205963	44209055	chr12	44227517	44231995	4	2.68288e-14	No	Yes	uc001rod.2;TMEM117;chr12:44224961-44234961;uc001roe.2;TMEM117;chr12:44224961-44234961;uc009zkc.2;DKFZp434K2435;chr12:44224961-44234961;
chr12:45562389-46125333	562944	chr12	45562389	45565412	chr12	46122245	46125333	3	1.03437e-09	No	Yes	uc001roq.2;BC047417;chr12:46116530-46126530;uc001ror.2;ARID2;chr12:46118619-46128619;uc001ros.1;ARID2;chr12:46118619-46128619;
chr12:45867797-46124343	256546	chr12	45867797	45870774	chr12	46120791	46124343	3	6.117e-10	No	Yes	uc001roq.2;BC047417;chr12:46116530-46126530;uc001ror.2;ARID2;chr12:46118619-46128619;uc001ros.1;ARID2;chr12:46118619-46128619;
chr12:45936322-46122745	186423	chr12	45936322	45939526	chr12	46119139	46122745	5	3.78579e-16	No	Yes	uc001roq.2;BC047417;chr12:46116530-46126530;uc001ror.2;ARID2;chr12:46118619-46128619;uc001ros.1;ARID2;chr12:46118619-46128619;
chr12:45964811-46122565	157754	chr12	45964811	45966757	chr12	46118929	46122565	3	3.86968e-11	No	Yes	uc001roq.2;BC047417;chr12:46116530-46126530;uc001ror.2;ARID2;chr12:46118619-46128619;uc001ros.1;ARID2;chr12:46118619-46128619;
chr12:45975529-46125350	149821	chr12	45975529	45978166	chr12	46122710	46125350	3	3.99934e-10	No	Yes	uc001roq.2;BC047417;chr12:46116530-46126530;uc001ror.2;ARID2;chr12:46118619-46128619;uc001ros.1;ARID2;chr12:46118619-46128619;
chr12:45979012-46123181	144169	chr12	45979012	45981582	chr12	46120847	46123181	4	1.40362e-14	No	Yes	uc001roq.2;BC047417;chr12:46116530-46126530;uc001ror.2;ARID2;chr12:46118619-46128619;uc001ros.1;ARID2;chr12:46118619-46128619;
chr12:45986194-46124502	138308	chr12	45986194	45990672	chr12	46119432	46124502	8	1.67165e-23	No	Yes	uc001roq.2;BC047417;chr12:46116530-46126530;uc001ror.2;ARID2;chr12:46118619-46128619;uc001ros.1;ARID2;chr12:46118619-46128619;
chr12:46218751-46229341	10590	chr12	46218751	46220862	chr12	46226687	46229341	3	6.21265e-15	No	Yes	uc001rot.1;DKFZp686G052;chr12:46225523-46235523;uc009zkg.1;ARID2;chr12:46225523-46235523;uc009zkh.1;ARID2;chr12:46226103-46236103;
chr12:46543823-46666455	122632	chr12	46543823	46552827	chr12	46658896	46666455	20	0	No	Yes	uc001rpa.2;SLC38A1;chr12:46655278-46665278;uc001rpb.2;SLC38A1;chr12:46658208-46668208;uc001rpc.2;SLC38A1;chr12:46658208-46668208;uc001rpd.2;SLC38A1;chr12:46658208-46668208;uc001rpe.2;SLC38A1;chr12:46658208-46668208;uc009zkj.1;SLC38A1;chr12:46656484-46666484;uc010slh.1;SLC38A1;chr12:46658208-46668208;
chr12:46545880-46768353	222473	chr12	46545880	46549399	chr12	46765278	46768353	3	2.14073e-08	No	Yes	uc001rpg.2;SLC38A2;chr12:46761645-46771645;uc001rph.2;SLC38A2;chr12:46761645-46771645;
chr12:46558533-46663775	105242	chr12	46558533	46560714	chr12	46660416	46663775	3	9.39529e-10	No	Yes	uc001rpa.2;SLC38A1;chr12:46655278-46665278;uc001rpb.2;SLC38A1;chr12:46658208-46668208;uc001rpc.2;SLC38A1;chr12:46658208-46668208;uc001rpd.2;SLC38A1;chr12:46658208-46668208;uc001rpe.2;SLC38A1;chr12:46658208-46668208;uc009zkj.1;SLC38A1;chr12:46656484-46666484;uc010slh.1;SLC38A1;chr12:46658208-46668208;
chr12:46568945-46665367	96422	chr12	46568945	46573694	chr12	46660070	46665367	7	6.91313e-19	No	Yes	uc001rpa.2;SLC38A1;chr12:46655278-46665278;uc001rpb.2;SLC38A1;chr12:46658208-46668208;uc001rpc.2;SLC38A1;chr12:46658208-46668208;uc001rpd.2;SLC38A1;chr12:46658208-46668208;uc001rpe.2;SLC38A1;chr12:46658208-46668208;uc009zkj.1;SLC38A1;chr12:46656484-46666484;uc010slh.1;SLC38A1;chr12:46658208-46668208;
chr12:46578378-46662474	84096	chr12	46578378	46580209	chr12	46659476	46662474	3	2.68221e-10	No	Yes	uc001rpa.2;SLC38A1;chr12:46655278-46665278;uc001rpb.2;SLC38A1;chr12:46658208-46668208;uc001rpc.2;SLC38A1;chr12:46658208-46668208;uc001rpd.2;SLC38A1;chr12:46658208-46668208;uc001rpe.2;SLC38A1;chr12:46658208-46668208;uc009zkj.1;SLC38A1;chr12:46656484-46666484;uc010slh.1;SLC38A1;chr12:46658208-46668208;
chr12:46580778-46662521	81743	chr12	46580778	46584756	chr12	46658842	46662521	3	1.24942e-09	No	Yes	uc001rpa.2;SLC38A1;chr12:46655278-46665278;uc001rpb.2;SLC38A1;chr12:46658208-46668208;uc001rpc.2;SLC38A1;chr12:46658208-46668208;uc001rpd.2;SLC38A1;chr12:46658208-46668208;uc001rpe.2;SLC38A1;chr12:46658208-46668208;uc009zkj.1;SLC38A1;chr12:46656484-46666484;uc010slh.1;SLC38A1;chr12:46658208-46668208;
chr12:46593439-46663699	70260	chr12	46593439	46596072	chr12	46660692	46663699	3	3.42478e-09	No	Yes	uc001rpa.2;SLC38A1;chr12:46655278-46665278;uc001rpb.2;SLC38A1;chr12:46658208-46668208;uc001rpc.2;SLC38A1;chr12:46658208-46668208;uc001rpd.2;SLC38A1;chr12:46658208-46668208;uc001rpe.2;SLC38A1;chr12:46658208-46668208;uc009zkj.1;SLC38A1;chr12:46656484-46666484;uc010slh.1;SLC38A1;chr12:46658208-46668208;
chr12:46595186-46656727	61541	chr12	46595186	46598496	chr12	46654294	46656727	3	1.77795e-11	No	Yes	uc001rpa.2;SLC38A1;chr12:46655278-46665278;uc009zkj.1;SLC38A1;chr12:46656484-46666484;
chr12:46598504-46664661	66157	chr12	46598504	46606384	chr12	46660159	46664661	13	1.49463e-35	No	Yes	uc001rpa.2;SLC38A1;chr12:46655278-46665278;uc001rpb.2;SLC38A1;chr12:46658208-46668208;uc001rpc.2;SLC38A1;chr12:46658208-46668208;uc001rpd.2;SLC38A1;chr12:46658208-46668208;uc001rpe.2;SLC38A1;chr12:46658208-46668208;uc009zkj.1;SLC38A1;chr12:46656484-46666484;uc010slh.1;SLC38A1;chr12:46658208-46668208;
chr12:46606426-46663877	57451	chr12	46606426	46610447	chr12	46660257	46663877	8	4.29231e-24	No	Yes	uc001rpa.2;SLC38A1;chr12:46655278-46665278;uc001rpb.2;SLC38A1;chr12:46658208-46668208;uc001rpc.2;SLC38A1;chr12:46658208-46668208;uc001rpd.2;SLC38A1;chr12:46658208-46668208;uc001rpe.2;SLC38A1;chr12:46658208-46668208;uc009zkj.1;SLC38A1;chr12:46656484-46666484;uc010slh.1;SLC38A1;chr12:46658208-46668208;
chr12:47424715-47476557	51842	chr12	47424715	47431022	chr12	47469878	47476557	9	1.1529e-28	No	Yes	uc001rpm.2;AMIGO2;chr12:47468734-47478734;uc001rpk.2;AMIGO2;chr12:47468734-47478734;uc001rpl.2;AMIGO2;chr12:47468734-47478734;uc001rpn.2;FAM113B;chr12:47468385-47478385;
chr12:47436026-47474758	38732	chr12	47436026	47440444	chr12	47469339	47474758	5	7.64674e-18	No	Yes	uc001rpm.2;AMIGO2;chr12:47468734-47478734;uc001rpk.2;AMIGO2;chr12:47468734-47478734;uc001rpl.2;AMIGO2;chr12:47468734-47478734;uc001rpn.2;FAM113B;chr12:47468385-47478385;
chr12:48416900-48552214	135314	chr12	48416900	48419304	chr12	48549157	48552214	3	3.23558e-11	No	Yes	uc001rrh.2;ASB8;chr12:48546377-48556377;uc010slr.1;ASB8;chr12:48546377-48556377;
chr12:49149266-49183886	34620	chr12	49149266	49153100	chr12	49181145	49183886	3	4.97363e-11	No	Yes	uc001rsh.3;ADCY6;chr12:49172877-49182877;uc001rsi.3;ADCY6;chr12:49177820-49187820;uc001rsj.3;ADCY6;chr12:49177820-49187820;
chr12:49150623-49209769	59146	chr12	49150623	49154139	chr12	49207469	49209769	3	7.61623e-11	No	Yes	uc010slx.1;CACNB3;chr12:49203233-49213233;uc010sly.1;CACNB3;chr12:49203233-49213233;uc010slz.1;CACNB3;chr12:49203675-49213675;uc001rsk.1;CACNB3;chr12:49203675-49213675;uc001rsl.1;CACNB3;chr12:49207511-49217511;
chr12:49220757-49248559	27802	chr12	49220757	49224194	chr12	49244606	49248559	4	3.53363e-13	No	Yes	uc001rsm.2;DDX23;chr12:49240957-49250957;
chr12:49230688-49246461	15773	chr12	49230688	49233544	chr12	49244460	49246461	3	2.09856e-11	No	Yes	uc001rsm.2;DDX23;chr12:49240957-49250957;
chr12:49338699-49371110	32411	chr12	49338699	49342027	chr12	49368577	49371110	3	1.89472e-13	No	Yes	uc001rss.2;WNT10B;chr12:49360543-49370543;uc001rst.2;WNT10B;chr12:49360543-49370543;uc001rsu.2;WNT1;chr12:49367235-49377235;
chr12:50278311-50300536	22225	chr12	50278311	50281286	chr12	50298604	50300536	3	8.25823e-14	No	Yes	uc001rvi.1;FAIM2;chr12:50291162-50301162;uc001rvj.1;FAIM2;chr12:50292765-50302765;uc001rvk.1;KIAA0950;chr12:50292765-50302765;
chr12:50280749-50304856	24107	chr12	50280749	50283185	chr12	50302000	50304856	3	1.00674e-11	No	Yes	uc001rvj.1;FAIM2;chr12:50292765-50302765;uc001rvk.1;KIAA0950;chr12:50292765-50302765;uc001rvl.2;LOC283332;chr12:50300646-50310646;uc001rvm.2;BC034605;chr12:50300735-50310735;
chr12:50283500-50302094	18594	chr12	50283500	50287015	chr12	50298892	50302094	3	1.31474e-12	No	Yes	uc001rvi.1;FAIM2;chr12:50291162-50301162;uc001rvj.1;FAIM2;chr12:50292765-50302765;uc001rvk.1;KIAA0950;chr12:50292765-50302765;uc001rvl.2;LOC283332;chr12:50300646-50310646;uc001rvm.2;BC034605;chr12:50300735-50310735;
chr12:50736936-50747917	10981	chr12	50736936	50740764	chr12	50743981	50747917	3	1.93722e-14	No	Yes	uc010smt.1;FAM186A;chr12:50745031-50755031;
chr12:51216774-51384198	167424	chr12	51216774	51221510	chr12	51379576	51384198	5	1.80791e-19	No	Yes	uc001rxg.1;SLC11A2;chr12:51383875-51393875;
chr12:52514011-53300114	786103	chr12	52514011	52518331	chr12	53293883	53300114	5	5.63184e-12	No	Yes	uc001sbd.2;KRT8;chr12:53293868-53303868;uc009zmj.2;KRT8;chr12:53293868-53303868;
chr12:52536110-53348033	811923	chr12	52536110	52548648	chr12	53335821	53348033	40	0	No	Yes	uc009zml.1;KRT8;chr12:53338608-53348608;uc009zmm.1;KRT8;chr12:53338626-53348626;uc009zmn.1;KRT18;chr12:53337654-53347654;uc001sbe.2;KRT18;chr12:53337654-53347654;uc001sbf.1;KRT18;chr12:53337842-53347842;uc001sbg.2;KRT18;chr12:53337842-53347842;uc009zmo.2;KRT18;chr12:53337842-53347842;
chr12:52536128-53303829	767701	chr12	52536128	52544810	chr12	53293015	53303829	24	5.66334e-31	No	Yes	uc001sbd.2;KRT8;chr12:53293868-53303868;uc009zmj.2;KRT8;chr12:53293868-53303868;
chr12:52540183-53626749	1086566	chr12	52540183	52543137	chr12	53624010	53626749	3	3.41357e-05	No	Yes	uc001sce.2;RARG;chr12:53621036-53631036;uc001scf.2;RARG;chr12:53621036-53631036;uc001scg.2;RARG;chr12:53621036-53631036;uc010soc.1;RARG;chr12:53621036-53631036;
chr12:52540187-53321454	781267	chr12	52540187	52545730	chr12	53317219	53321454	11	8.09002e-20	No	Yes	uc009zmk.1;KRT8;chr12:53315253-53325253;
chr12:52540540-53401874	861334	chr12	52540540	52543133	chr12	53398468	53401874	5	6.84331e-09	No	Yes	uc009zmp.1;eIF4B;chr12:53395061-53405061;uc001sbh.3;EIF4B;chr12:53395061-53405061;uc010snu.1;EIF4B;chr12:53395061-53405061;uc010snv.1;EIF4B;chr12:53395061-53405061;
chr12:52547501-53302678	755177	chr12	52547501	52550823	chr12	53299256	53302678	4	2.90002e-09	No	Yes	uc001sbd.2;KRT8;chr12:53293868-53303868;uc009zmj.2;KRT8;chr12:53293868-53303868;
chr12:52592050-53300949	708899	chr12	52592050	52598663	chr12	53296076	53300949	10	4.10223e-13	No	Yes	uc001sbd.2;KRT8;chr12:53293868-53303868;uc009zmj.2;KRT8;chr12:53293868-53303868;
chr12:52593542-53401803	808261	chr12	52593542	52597808	chr12	53400010	53401803	3	1.98649e-05	No	Yes	uc009zmp.1;eIF4B;chr12:53395061-53405061;uc001sbh.3;EIF4B;chr12:53395061-53405061;uc010snu.1;EIF4B;chr12:53395061-53405061;uc010snv.1;EIF4B;chr12:53395061-53405061;
chr12:52593666-53342811	749145	chr12	52593666	52599386	chr12	53337322	53342811	8	3.24127e-11	No	Yes	uc009zml.1;KRT8;chr12:53338608-53348608;uc009zmm.1;KRT8;chr12:53338626-53348626;uc009zmn.1;KRT18;chr12:53337654-53347654;uc001sbe.2;KRT18;chr12:53337654-53347654;uc001sbf.1;KRT18;chr12:53337842-53347842;uc001sbg.2;KRT18;chr12:53337842-53347842;uc009zmo.2;KRT18;chr12:53337842-53347842;
chr12:52616401-53344390	727989	chr12	52616401	52618686	chr12	53341645	53344390	3	4.73543e-07	No	Yes	uc009zml.1;KRT8;chr12:53338608-53348608;uc009zmm.1;KRT8;chr12:53338626-53348626;uc009zmn.1;KRT18;chr12:53337654-53347654;uc001sbe.2;KRT18;chr12:53337654-53347654;uc001sbf.1;KRT18;chr12:53337842-53347842;uc001sbg.2;KRT18;chr12:53337842-53347842;uc009zmo.2;KRT18;chr12:53337842-53347842;
chr12:52634219-53300993	666774	chr12	52634219	52636525	chr12	53298420	53300993	3	6.40635e-07	No	Yes	uc001sbd.2;KRT8;chr12:53293868-53303868;uc009zmj.2;KRT8;chr12:53293868-53303868;
chr12:52738745-53401008	662263	chr12	52738745	52742484	chr12	53397269	53401008	3	8.72628e-07	No	Yes	uc009zmp.1;eIF4B;chr12:53395061-53405061;uc001sbh.3;EIF4B;chr12:53395061-53405061;uc010snu.1;EIF4B;chr12:53395061-53405061;uc010snv.1;EIF4B;chr12:53395061-53405061;
chr12:52817066-52834998	17932	chr12	52817066	52820003	chr12	52831728	52834998	4	1.96135e-16	No	Yes	uc001saj.2;KRT75;chr12:52823110-52833110;
chr12:53134121-53189345	55224	chr12	53134121	53136884	chr12	53187002	53189345	3	5.47756e-14	No	Yes	uc001say.2;KRT3;chr12:53184892-53194892;
chr12:53264561-53345354	80793	chr12	53264561	53270202	chr12	53338495	53345354	11	3.41708e-19	No	Yes	uc009zml.1;KRT8;chr12:53338608-53348608;uc009zmm.1;KRT8;chr12:53338626-53348626;uc009zmn.1;KRT18;chr12:53337654-53347654;uc001sbe.2;KRT18;chr12:53337654-53347654;uc001sbf.1;KRT18;chr12:53337842-53347842;uc001sbg.2;KRT18;chr12:53337842-53347842;uc009zmo.2;KRT18;chr12:53337842-53347842;
chr12:53370703-53446936	76233	chr12	53370703	53373718	chr12	53444896	53446936	3	4.66828e-10	No	Yes	uc001sbj.1;CR590020;chr12:53435841-53445841;uc001sbk.1;AK096472;chr12:53443222-53453222;uc001sbl.2;TENC1;chr12:53435809-53445809;uc001sbm.2;KIAA1075;chr12:53437732-53447732;uc001sbn.2;TENC1;chr12:53437732-53447732;uc001sbo.1;KIAA1075;chr12:53438834-53448834;uc001sbp.2;TENC1;chr12:53438834-53448834;
chr12:53376511-53443346	66835	chr12	53376511	53379693	chr12	53440636	53443346	4	3.25143e-13	No	Yes	uc001sbj.1;CR590020;chr12:53435841-53445841;uc001sbk.1;AK096472;chr12:53443222-53453222;uc001sbl.2;TENC1;chr12:53435809-53445809;uc001sbm.2;KIAA1075;chr12:53437732-53447732;uc001sbn.2;TENC1;chr12:53437732-53447732;uc001sbo.1;KIAA1075;chr12:53438834-53448834;uc001sbp.2;TENC1;chr12:53438834-53448834;
chr12:53721358-53816339	94981	chr12	53721358	53723902	chr12	53814167	53816339	3	2.79482e-11	No	Yes	uc001scx.1;AMHR2;chr12:53812640-53822640;uc009zmy.1;AMHR2;chr12:53812640-53822640;
chr12:53738440-53775534	37094	chr12	53738440	53742453	chr12	53772329	53775534	6	2.23234e-17	No	Yes	uc001scw.2;SP1;chr12:53768978-53778978;uc010sog.1;SP1;chr12:53769427-53779427;
chr12:53743036-53896085	153049	chr12	53743036	53746853	chr12	53893399	53896085	3	6.12542e-10	No	Yes	uc001sdm.1;MAP3K12;chr12:53888271-53898271;uc001sdn.1;MAP3K12;chr12:53888271-53898271;uc009znb.2;TARBP2;chr12:53889704-53899704;uc001sdp.2;TARBP2;chr12:53889704-53899704;uc001sdo.2;TARBP2;chr12:53889704-53899704;uc001sdq.2;TARBP2;chr12:53889704-53899704;uc001sdr.2;TARBP2;chr12:53889704-53899704;uc001sds.2;TARBP2;chr12:53889704-53899704;uc001sdt.2;TARBP2;chr12:53890376-53900376;uc001sdu.2;TARBP2;c…
chr12:53744814-53816947	72133	chr12	53744814	53747995	chr12	53813564	53816947	6	1.50603e-23	No	Yes	uc001scx.1;AMHR2;chr12:53812640-53822640;uc009zmy.1;AMHR2;chr12:53812640-53822640;
chr12:53929259-54021524	92265	chr12	53929259	53932535	chr12	54018819	54021524	3	6.61081e-10	No	Yes	uc010sok.1;ATF7;chr12:54015199-54025199;uc001sdz.2;ATF7;chr12:54015199-54025199;uc010sol.1;ATF7;chr12:54015199-54025199;uc001sea.3;ATF7;chr12:54014778-54024778;uc001seb.3;ATF7;chr12:54015199-54025199;
chr12:53931213-54071490	140277	chr12	53931213	53934593	chr12	54067886	54071490	5	8.81617e-16	No	Yes	uc001sec.2;ATP5G2;chr12:54065109-54075109;uc001sed.2;ATP5G2;chr12:54065512-54075512;uc009znc.2;ATP5G2;chr12:54065512-54075512;
chr12:53935119-54070606	135487	chr12	53935119	53938802	chr12	54067983	54070606	3	3.23963e-10	No	Yes	uc001sec.2;ATP5G2;chr12:54065109-54075109;uc001sed.2;ATP5G2;chr12:54065512-54075512;uc009znc.2;ATP5G2;chr12:54065512-54075512;
chr12:54156298-54372088	215790	chr12	54156298	54160165	chr12	54370001	54372088	4	1.66449e-15	No	Yes	uc001sem.2;HOXC11;chr12:54361909-54371909;
chr12:54158068-54394481	236413	chr12	54158068	54162279	chr12	54391005	54394481	4	6.78033e-14	No	Yes	uc001sep.2;HOXC9;chr12:54384292-54394292;uc001seq.2;HOXC9;chr12:54388876-54398876;
chr12:54158275-54334850	176575	chr12	54158275	54162666	chr12	54331203	54334850	5	1.32391e-15	No	Yes	uc001sei.2;HOXC13;chr12:54327575-54337575;uc010sop.1;HOXC13;chr12:54327575-54337575;
chr12:54182566-54334409	151843	chr12	54182566	54187804	chr12	54331933	54334409	5	1.91873e-15	No	Yes	uc001sei.2;HOXC13;chr12:54327575-54337575;uc010sop.1;HOXC13;chr12:54327575-54337575;
chr12:54185483-54368865	183382	chr12	54185483	54188090	chr12	54366729	54368865	3	3.54565e-10	No	Yes	uc009zne.2;HOTAIR;chr12:54357515-54367515;uc001sem.2;HOXC11;chr12:54361909-54371909;
chr12:54186532-54340331	153799	chr12	54186532	54191257	chr12	54335046	54340331	5	2.3534e-17	No	Yes	uc001sei.2;HOXC13;chr12:54327575-54337575;uc010sop.1;HOXC13;chr12:54327575-54337575;
chr12:54188548-54332867	144319	chr12	54188548	54191388	chr12	54330675	54332867	3	9.5536e-11	No	Yes	uc001sei.2;HOXC13;chr12:54327575-54337575;uc010sop.1;HOXC13;chr12:54327575-54337575;
chr12:54194854-54337954	143100	chr12	54194854	54200137	chr12	54330162	54337954	26	0	No	Yes	uc001sei.2;HOXC13;chr12:54327575-54337575;uc010sop.1;HOXC13;chr12:54327575-54337575;
chr12:54196073-54372922	176849	chr12	54196073	54201271	chr12	54365836	54372922	14	4.10879e-40	No	Yes	uc009zne.2;HOTAIR;chr12:54357515-54367515;uc001sem.2;HOXC11;chr12:54361909-54371909;
chr12:54196484-54328003	131519	chr12	54196484	54198880	chr12	54325173	54328003	3	3.83047e-11	No	Yes	uc001sei.2;HOXC13;chr12:54327575-54337575;uc010sop.1;HOXC13;chr12:54327575-54337575;
chr12:54198206-54378228	180022	chr12	54198206	54200970	chr12	54376493	54378228	3	5.16118e-11	No	Yes	uc001sen.2;HOXC10;chr12:54373945-54383945;
chr12:54207870-54334988	127118	chr12	54207870	54212397	chr12	54331127	54334988	4	1.47356e-12	No	Yes	uc001sei.2;HOXC13;chr12:54327575-54337575;uc010sop.1;HOXC13;chr12:54327575-54337575;
chr12:54219040-54369302	150262	chr12	54219040	54222781	chr12	54367232	54369302	3	1.28822e-09	No	Yes	uc009zne.2;HOTAIR;chr12:54357515-54367515;uc001sem.2;HOXC11;chr12:54361909-54371909;
chr12:54238192-54334874	96682	chr12	54238192	54242041	chr12	54332290	54334874	5	1.58489e-15	No	Yes	uc001sei.2;HOXC13;chr12:54327575-54337575;uc010sop.1;HOXC13;chr12:54327575-54337575;
chr12:54262615-54333827	71212	chr12	54262615	54265691	chr12	54330225	54333827	3	3.99551e-10	No	Yes	uc001sei.2;HOXC13;chr12:54327575-54337575;uc010sop.1;HOXC13;chr12:54327575-54337575;
chr12:54528576-54584139	55563	chr12	54528576	54530789	chr12	54581183	54584139	3	4.43212e-12	No	Yes	uc001sfe.1;SMUG1;chr12:54577757-54587757;uc001sff.1;SMUG1;chr12:54577757-54587757;uc001sfg.1;SMUG1;chr12:54577757-54587757;uc009znf.1;SMUG1;chr12:54577757-54587757;uc001sfb.3;SMUG1;chr12:54577589-54587589;uc001sfc.3;SMUG1;chr12:54577687-54587687;uc001sfd.3;SMUG1;chr12:54577757-54587757;
chr12:54551898-54583976	32078	chr12	54551898	54554356	chr12	54579644	54583976	4	4.41303e-15	No	Yes	uc001sfa.1;AX747003;chr12:54571165-54581165;uc001sfe.1;SMUG1;chr12:54577757-54587757;uc001sff.1;SMUG1;chr12:54577757-54587757;uc001sfg.1;SMUG1;chr12:54577757-54587757;uc009znf.1;SMUG1;chr12:54577757-54587757;uc001sfb.3;SMUG1;chr12:54577589-54587589;uc001sfc.3;SMUG1;chr12:54577687-54587687;uc001sfd.3;SMUG1;chr12:54577757-54587757;
chr12:56050760-56125150	74390	chr12	56050760	56053570	chr12	56121804	56125150	4	1.80176e-13	No	Yes	uc009znz.2;CD63;chr12:56117136-56127136;uc001shm.2;CD63;chr12:56117221-56127221;uc001shn.2;CD63;chr12:56117910-56127910;uc001sho.2;CD63;chr12:56117910-56127910;uc001shp.2;CD63;chr12:56118444-56128444;
chr12:56065486-56124275	58789	chr12	56065486	56067557	chr12	56121571	56124275	3	9.43521e-11	No	Yes	uc009znz.2;CD63;chr12:56117136-56127136;uc001shm.2;CD63;chr12:56117221-56127221;uc001shn.2;CD63;chr12:56117910-56127910;uc001sho.2;CD63;chr12:56117910-56127910;uc001shp.2;CD63;chr12:56118444-56128444;
chr12:56192681-56322974	130293	chr12	56192681	56195274	chr12	56320128	56322974	3	1.28668e-10	No	Yes	uc001sie.1;WIBG;chr12:56316051-56326051;uc001sif.1;WIBG;chr12:56316697-56326697;uc001sig.2;PYM;chr12:56316697-56326697;uc009zoc.1;DGKA;chr12:56319945-56329945;uc001sih.1;DGKA;chr12:56319945-56329945;uc001sii.1;DGKA;chr12:56319945-56329945;uc009zod.1;DGKA;chr12:56319945-56329945;uc001sij.2;DGKA;chr12:56319945-56329945;uc009zoe.1;DAGK1;chr12:56320811-56330811;uc001sik.2;DGKA;chr12:56320811-56330811…
chr12:56346732-56512206	165474	chr12	56346732	56350497	chr12	56509495	56512206	3	2.21061e-07	No	Yes	uc001sjn.2;RPL41;chr12:56505373-56515373;uc001sjo.2;RPL41;chr12:56505373-56515373;uc001sjp.1;ZC3H10;chr12:56507029-56517029;
chr12:56378791-56437217	58426	chr12	56378791	56380809	chr12	56434636	56437217	3	6.64171e-10	No	Yes	uc001sjf.2;RPS26;chr12:56430685-56440685;
chr12:56591195-56617847	26652	chr12	56591195	56594322	chr12	56614613	56617847	3	3.2278e-11	No	Yes	uc001ske.1;RNF41;chr12:56610704-56620704;uc001skf.1;RNF41;chr12:56610704-56620704;uc001skg.1;RNF41;chr12:56610735-56620735;uc010sqg.1;RNF41;chr12:56610735-56620735;uc010sqh.1;RNF41;chr12:56610735-56620735;uc001skh.2;RNF41;chr12:56610704-56620704;uc001ski.2;OBFC2B;chr12:56613124-56623124;uc001skk.2;OBFC2B;chr12:56613235-56623235;uc001skj.2;OBFC2B;chr12:56613238-56623238;
chr12:56769455-56859883	90428	chr12	56769455	56772354	chr12	56856739	56859883	3	2.95044e-13	No	Yes	uc010sqo.1;SPRYD4;chr12:56857300-56867300;uc001sli.3;SPRYD4;chr12:56857300-56867300;
chr12:57340605-57390645	50040	chr12	57340605	57343794	chr12	57388280	57390645	3	3.96462e-13	No	Yes	uc001smk.2;GPR182;chr12:57383354-57393354;
chr12:59268786-59313984	45198	chr12	59268786	59271199	chr12	59312265	59313984	3	2.60017e-12	No	Yes	uc009zqh.2;LRIG3;chr12:59308327-59318327;uc001sqr.2;LRIG3;chr12:59309262-59319262;uc010ssh.1;UNQ287;chr12:59309262-59319262;
chr12:62609057-62655550	46493	chr12	62609057	62611172	chr12	62653238	62655550	3	9.49613e-11	No	Yes	uc001sqx.2;FAM19A2;chr12:62647623-62657623;uc001sqy.2;DKFZp761E1217;chr12:62648925-62658925;uc001sqz.1;AK128013;chr12:62648509-62658509;uc010ssj.1;KIAA0529;chr12:62649186-62659186;uc010ssk.1;KIAA0529;chr12:62649186-62659186;uc001sra.2;USP15;chr12:62649186-62659186;uc001srb.1;USP15;chr12:62649186-62659186;uc001src.1;USP15;chr12:62649186-62659186;
chr12:63199599-63329908	130309	chr12	63199599	63203021	chr12	63327294	63329908	3	1.43635e-10	No	Yes	uc001srk.3;PPM1H;chr12:63323665-63333665;uc001srm.2;BC040177;chr12:63323915-63333915;
chr12:63203328-63330250	126922	chr12	63203328	63205155	chr12	63327538	63330250	3	3.80742e-11	No	Yes	uc001srk.3;PPM1H;chr12:63323665-63333665;uc001srm.2;BC040177;chr12:63323915-63333915;
chr12:63205779-63329891	124112	chr12	63205779	63208274	chr12	63327328	63329891	3	8.30021e-11	No	Yes	uc001srk.3;PPM1H;chr12:63323665-63333665;uc001srm.2;BC040177;chr12:63323915-63333915;
chr12:63241092-63330263	89171	chr12	63241092	63243351	chr12	63327423	63330263	5	7.00605e-17	No	Yes	uc001srk.3;PPM1H;chr12:63323665-63333665;uc001srm.2;BC040177;chr12:63323915-63333915;
chr12:63244647-63328475	83828	chr12	63244647	63247922	chr12	63326690	63328475	3	1.75212e-11	No	Yes	uc001srk.3;PPM1H;chr12:63323665-63333665;uc001srm.2;BC040177;chr12:63323915-63333915;
chr12:63255291-63329633	74342	chr12	63255291	63258681	chr12	63326794	63329633	4	1.93537e-13	No	Yes	uc001srk.3;PPM1H;chr12:63323665-63333665;uc001srm.2;BC040177;chr12:63323915-63333915;
chr12:63263678-63330278	66600	chr12	63263678	63269164	chr12	63325830	63330278	6	1.94158e-19	No	Yes	uc001srk.3;PPM1H;chr12:63323665-63333665;uc001srm.2;BC040177;chr12:63323915-63333915;
chr12:63270778-63330473	59695	chr12	63270778	63274570	chr12	63326968	63330473	4	1.24595e-13	No	Yes	uc001srk.3;PPM1H;chr12:63323665-63333665;uc001srm.2;BC040177;chr12:63323915-63333915;
chr12:63311342-63329620	18278	chr12	63311342	63314534	chr12	63326945	63329620	5	3.61381e-17	No	Yes	uc001srk.3;PPM1H;chr12:63323665-63333665;uc001srm.2;BC040177;chr12:63323915-63333915;
chr12:64311913-64617132	305219	chr12	64311913	64317096	chr12	64612694	64617132	6	2.97694e-18	No	Yes	uc001srw.3;C12orf66;chr12:64611076-64621076;uc009zql.2;C12orf66;chr12:64611076-64621076;uc001srx.2;BC042855;chr12:64611116-64621116;
chr12:64473688-64616183	142495	chr12	64473688	64476809	chr12	64613959	64616183	3	1.05388e-09	No	Yes	uc001srw.3;C12orf66;chr12:64611076-64621076;uc009zql.2;C12orf66;chr12:64611076-64621076;uc001srx.2;BC042855;chr12:64611116-64621116;
chr12:64497143-64617414	120271	chr12	64497143	64499871	chr12	64614144	64617414	4	6.34078e-14	No	Yes	uc001srw.3;C12orf66;chr12:64611076-64621076;uc009zql.2;C12orf66;chr12:64611076-64621076;uc001srx.2;BC042855;chr12:64611116-64621116;
chr12:64579699-64617129	37430	chr12	64579699	64582531	chr12	64614447	64617129	4	1.02121e-13	No	Yes	uc001srw.3;C12orf66;chr12:64611076-64621076;uc009zql.2;C12orf66;chr12:64611076-64621076;uc001srx.2;BC042855;chr12:64611116-64621116;
chr12:64586725-64617345	30620	chr12	64586725	64590184	chr12	64613971	64617345	3	3.4949e-10	No	Yes	uc001srw.3;C12orf66;chr12:64611076-64621076;uc009zql.2;C12orf66;chr12:64611076-64621076;uc001srx.2;BC042855;chr12:64611116-64621116;
chr12:64945499-65004923	59424	chr12	64945499	64948729	chr12	65002474	65004923	4	1.64566e-14	No	Yes	uc001ssd.2;RASSF3;chr12:64999292-65009292;uc009zqn.2;RASSF5;chr12:64999292-65009292;
chr12:64985461-65004477	19016	chr12	64985461	64990350	chr12	65002165	65004477	4	9.81654e-15	No	Yes	uc001ssd.2;RASSF3;chr12:64999292-65009292;uc009zqn.2;RASSF5;chr12:64999292-65009292;
chr12:65135561-65149622	14061	chr12	65135561	65138937	chr12	65146075	65149622	4	7.99209e-16	No	Yes	uc001ssf.2;GNS;chr12:65141651-65151651;uc001ssg.3;GNS;chr12:65148226-65158226;uc010ssq.1;GNS;chr12:65148226-65158226;uc010ssr.1;GNS;chr12:65148226-65158226;
chr12:65165176-65175925	10749	chr12	65165176	65168344	chr12	65173488	65175925	5	2.64509e-18	No	Yes	uc001ssh.1;TBC1D30;chr12:65174790-65184790;
chr12:65192497-65220257	27760	chr12	65192497	65197582	chr12	65216836	65220257	7	1.67773e-23	No	Yes	uc010sss.1;KIAA0984;chr12:65213409-65223409;uc010sst.1;TBC1D30;chr12:65213409-65223409;uc001ssi.1;KIAA0984;chr12:65213409-65223409;
chr12:65202210-65221152	18942	chr12	65202210	65206600	chr12	65217104	65221152	6	2.6892e-20	No	Yes	uc010sss.1;KIAA0984;chr12:65213409-65223409;uc010sst.1;TBC1D30;chr12:65213409-65223409;uc001ssi.1;KIAA0984;chr12:65213409-65223409;
chr12:65203247-65216157	12910	chr12	65203247	65209408	chr12	65212214	65216157	7	1.15581e-25	No	Yes	uc010sss.1;KIAA0984;chr12:65213409-65223409;uc010sst.1;TBC1D30;chr12:65213409-65223409;uc001ssi.1;KIAA0984;chr12:65213409-65223409;
chr12:65208981-65220014	11033	chr12	65208981	65211933	chr12	65216865	65220014	5	1.51529e-17	No	Yes	uc010sss.1;KIAA0984;chr12:65213409-65223409;uc010sst.1;TBC1D30;chr12:65213409-65223409;uc001ssi.1;KIAA0984;chr12:65213409-65223409;
chr12:65522647-65564541	41894	chr12	65522647	65525945	chr12	65561896	65564541	3	5.5473e-10	No	Yes	uc001ssl.1;LEMD3;chr12:65558370-65568370;uc009zqo.1;LEMD3;chr12:65558370-65568370;
chr12:65547394-65565311	17917	chr12	65547394	65550074	chr12	65562682	65565311	3	1.21836e-10	No	Yes	uc001ssl.1;LEMD3;chr12:65558370-65568370;uc009zqo.1;LEMD3;chr12:65558370-65568370;
chr12:67460777-67665703	204926	chr12	67460777	67464522	chr12	67661841	67665703	9	4.70101e-23	No	Yes	uc001stn.2;CAND1;chr12:67658060-67668060;
chr12:67646945-67662984	16039	chr12	67646945	67649211	chr12	67660475	67662984	3	8.91806e-12	No	Yes	uc001stn.2;CAND1;chr12:67658060-67668060;
chr12:67985620-68045287	59667	chr12	67985620	67988382	chr12	68041302	68045287	3	5.61958e-10	No	Yes	uc001str.3;DYRK2;chr12:68037511-68047511;uc001sts.3;DYRK2;chr12:68037511-68047511;
chr12:68023309-68043323	20014	chr12	68023309	68025721	chr12	68040389	68043323	3	1.31989e-11	No	Yes	uc001str.3;DYRK2;chr12:68037511-68047511;uc001sts.3;DYRK2;chr12:68037511-68047511;
chr12:68758007-69006141	248134	chr12	68758007	68760483	chr12	69003483	69006141	4	4.944e-13	No	Yes	uc010ste.1;RAP1A;chr12:68999651-69009651;uc001sub.2;RAP1A;chr12:68999651-69009651;uc001suc.2;RAP1B;chr12:68999651-69009651;uc010stf.1;RAP1A;chr12:68999651-69009651;uc010stg.1;RAP1A;chr12:68999651-69009651;uc010sth.1;RAP1A;chr12:68999651-69009651;uc010sti.1;RAP1A;chr12:68999651-69009651;
chr12:68976680-69006008	29328	chr12	68976680	68979501	chr12	69003965	69006008	3	3.33046e-10	No	Yes	uc010ste.1;RAP1A;chr12:68999651-69009651;uc001sub.2;RAP1A;chr12:68999651-69009651;uc001suc.2;RAP1B;chr12:68999651-69009651;uc010stf.1;RAP1A;chr12:68999651-69009651;uc010stg.1;RAP1A;chr12:68999651-69009651;uc010sth.1;RAP1A;chr12:68999651-69009651;uc010sti.1;RAP1A;chr12:68999651-69009651;
chr12:69546557-69634918	88361	chr12	69546557	69550931	chr12	69632918	69634918	4	2.98428e-13	No	Yes	uc001sut.3;CPSF6;chr12:69628316-69638316;uc001suu.3;CPSF6;chr12:69628316-69638316;
chr12:69808674-69865485	56811	chr12	69808674	69814074	chr12	69861745	69865485	6	1.00838e-20	No	Yes	uc001suy.2;FRS2;chr12:69859128-69869128;uc001suz.2;FRS2;chr12:69859128-69869128;uc009zrj.2;FRS2;chr12:69859128-69869128;uc009zrk.2;FRS2;chr12:69859128-69869128;
chr12:69829206-69865514	36308	chr12	69829206	69831016	chr12	69861783	69865514	4	3.84911e-16	No	Yes	uc001suy.2;FRS2;chr12:69859128-69869128;uc001suz.2;FRS2;chr12:69859128-69869128;uc009zrj.2;FRS2;chr12:69859128-69869128;uc009zrk.2;FRS2;chr12:69859128-69869128;
chr12:69838503-69980704	142201	chr12	69838503	69840649	chr12	69978183	69980704	3	2.53107e-11	No	Yes	uc001svb.1;CCT2;chr12:69974207-69984207;uc009zrm.1;CCT2;chr12:69974207-69984207;uc009zrn.1;CCT2;chr12:69974207-69984207;uc010stl.1;CCT2;chr12:69974461-69984461;
chr12:70072844-70084185	11341	chr12	70072844	70074597	chr12	70081816	70084185	3	2.7622e-14	No	Yes	uc001svf.2;BEST3;chr12:70078056-70088056;
chr12:70123273-70133587	10314	chr12	70123273	70127252	chr12	70129241	70133587	7	5.71093e-27	No	Yes	uc001svj.1;BC042465;chr12:70127348-70137348;uc001svk.2;CR601808;chr12:70127348-70137348;uc001svl.1;RAB3IP;chr12:70127630-70137630;uc001svm.2;RAB3IP;chr12:70127630-70137630;uc001svn.2;RAB3IP;chr12:70127630-70137630;uc001svo.2;RAB3IP;chr12:70127630-70137630;uc001svp.2;RAB3IP;chr12:70128179-70138179;uc001svq.2;RAB3IP;chr12:70128179-70138179;uc001svr.2;RAB3IP;chr12:70128179-70138179;uc001svs.2;RAB3IP…
chr12:70716725-70728014	11289	chr12	70716725	70723570	chr12	70723262	70728014	8	1.78533e-31	No	Yes	uc001svw.1;CNOT2;chr12:70726168-70736168;
chr12:70996034-71034490	38456	chr12	70996034	70998162	chr12	71032233	71034490	3	7.5201e-14	No	Yes	uc001swc.3;PTPRB;chr12:71026219-71036219;uc001swa.3;PTPRB;chr12:71026219-71036219;uc001swd.3;PTPRB;chr12:71026219-71036219;uc009zrr.1;PTPRB;chr12:71026219-71036219;uc001swe.2;PTPRB;chr12:71026219-71036219;
chr12:75918799-76427634	508835	chr12	75918799	75923199	chr12	76423182	76427634	7	4.82273e-22	No	Yes	uc001sxu.2;PHLDA1;chr12:76420556-76430556;
chr12:76013741-76427305	413564	chr12	76013741	76020372	chr12	76422912	76427305	12	6.72899e-38	No	Yes	uc001sxu.2;PHLDA1;chr12:76420556-76430556;
chr12:76098481-76426874	328393	chr12	76098481	76102086	chr12	76423023	76426874	6	7.58023e-18	No	Yes	uc001sxu.2;PHLDA1;chr12:76420556-76430556;
chr12:76115281-76427406	312125	chr12	76115281	76117362	chr12	76425033	76427406	3	1.57957e-09	No	Yes	uc001sxu.2;PHLDA1;chr12:76420556-76430556;
chr12:76126561-76427260	300699	chr12	76126561	76130234	chr12	76422828	76427260	4	7.77784e-13	No	Yes	uc001sxu.2;PHLDA1;chr12:76420556-76430556;
chr12:76208408-76427077	218669	chr12	76208408	76211857	chr12	76424020	76427077	5	8.14478e-16	No	Yes	uc001sxu.2;PHLDA1;chr12:76420556-76430556;
chr12:76361510-76427233	65723	chr12	76361510	76364428	chr12	76424431	76427233	3	5.13225e-10	No	Yes	uc001sxu.2;PHLDA1;chr12:76420556-76430556;
chr12:76367085-76422208	55123	chr12	76367085	76371704	chr12	76418157	76422208	6	2.34752e-20	No	Yes	uc001sxu.2;PHLDA1;chr12:76420556-76430556;
chr12:76370416-76429104	58688	chr12	76370416	76374850	chr12	76424109	76429104	10	3.1882e-29	No	Yes	uc001sxu.2;PHLDA1;chr12:76420556-76430556;
chr12:76371739-76422518	50779	chr12	76371739	76374717	chr12	76420196	76422518	3	1.7245e-10	No	Yes	uc001sxu.2;PHLDA1;chr12:76420556-76430556;
chr12:76382858-76420766	37908	chr12	76382858	76386960	chr12	76418966	76420766	3	2.37603e-11	No	Yes	uc001sxu.2;PHLDA1;chr12:76420556-76430556;
chr12:76384654-76426974	42320	chr12	76384654	76392197	chr12	76420896	76426974	11	6.40913e-33	No	Yes	uc001sxu.2;PHLDA1;chr12:76420556-76430556;
chr12:77107898-77159680	51782	chr12	77107898	77110886	chr12	77155461	77159680	4	2.52431e-14	No	Yes	uc001syi.1;KIAA0946;chr12:77152853-77162853;uc001syj.2;KIAA0946;chr12:77152853-77162853;uc001syk.1;ZDHHC17;chr12:77152853-77162853;
chr12:77111148-77158859	47711	chr12	77111148	77115066	chr12	77156023	77158859	6	2.2096e-20	No	Yes	uc001syi.1;KIAA0946;chr12:77152853-77162853;uc001syj.2;KIAA0946;chr12:77152853-77162853;uc001syk.1;ZDHHC17;chr12:77152853-77162853;
chr12:77135545-77159481	23936	chr12	77135545	77138860	chr12	77157546	77159481	3	2.00159e-10	No	Yes	uc001syi.1;KIAA0946;chr12:77152853-77162853;uc001syj.2;KIAA0946;chr12:77152853-77162853;uc001syk.1;ZDHHC17;chr12:77152853-77162853;
chr12:79417332-79440806	23474	chr12	79417332	79420225	chr12	79438119	79440806	3	9.36808e-12	No	Yes	uc001syv.2;SYT1;chr12:79434432-79444432;
chr12:79801591-80087405	285814	chr12	79801591	79809069	chr12	80078927	80087405	12	1.15183e-32	No	Yes	uc001syx.2;PAWR;chr12:80079790-80089790;
chr12:79810688-80086925	276237	chr12	79810688	79815866	chr12	80082941	80086925	8	9.43681e-23	No	Yes	uc001syx.2;PAWR;chr12:80079790-80089790;
chr12:79937935-80088262	150327	chr12	79937935	79946885	chr12	80079394	80088262	18	0	No	Yes	uc001syx.2;PAWR;chr12:80079790-80089790;
chr12:79947732-80087482	139750	chr12	79947732	79953639	chr12	80082498	80087482	12	2.15337e-36	No	Yes	uc001syx.2;PAWR;chr12:80079790-80089790;
chr12:79989119-80087219	98100	chr12	79989119	79991810	chr12	80083649	80087219	4	1.60875e-13	No	Yes	uc001syx.2;PAWR;chr12:80079790-80089790;
chr12:79994579-80086058	91479	chr12	79994579	79997812	chr12	80083042	80086058	3	8.86086e-10	No	Yes	uc001syx.2;PAWR;chr12:80079790-80089790;
chr12:80017170-80085994	68824	chr12	80017170	80019368	chr12	80083211	80085994	3	7.64573e-10	No	Yes	uc001syx.2;PAWR;chr12:80079790-80089790;
chr12:80055657-80085938	30281	chr12	80055657	80062349	chr12	80079313	80085938	6	6.47617e-17	No	Yes	uc001syx.2;PAWR;chr12:80079790-80089790;
chr12:80063318-80086423	23105	chr12	80063318	80066485	chr12	80083227	80086423	4	1.64412e-12	No	Yes	uc001syx.2;PAWR;chr12:80079790-80089790;
chr12:80071029-80080849	9820	chr12	80071029	80074584	chr12	80078938	80080849	3	2.09457e-11	No	Yes	uc001syx.2;PAWR;chr12:80079790-80089790;
chr12:80269690-80329417	59727	chr12	80269690	80273895	chr12	80326784	80329417	4	1.18466e-13	No	Yes	uc001sza.2;PPP1R12A;chr12:80323731-80333731;uc001syz.2;PPP1R12A;chr12:80323978-80333978;uc010sud.1;PPP1R12A;chr12:80324235-80334235;uc001szb.2;PPP1R12A;chr12:80324235-80334235;uc001szc.2;PPP1R12A;chr12:80323978-80333978;
chr12:83027721-83081760	54039	chr12	83027721	83031479	chr12	83077251	83081760	5	2.21207e-16	No	Yes	uc001szr.1;TMTC2;chr12:83075933-83085933;uc001szs.1;TMTC2;chr12:83075933-83085933;uc001szt.2;TMTC2;chr12:83075933-83085933;uc010suk.1;TMTC2;chr12:83075933-83085933;
chr12:83068566-83077801	9235	chr12	83068566	83070465	chr12	83075258	83077801	3	1.11315e-13	No	Yes	uc001szr.1;TMTC2;chr12:83075933-83085933;uc001szs.1;TMTC2;chr12:83075933-83085933;uc001szt.2;TMTC2;chr12:83075933-83085933;uc010suk.1;TMTC2;chr12:83075933-83085933;
chr12:88947794-88975371	27577	chr12	88947794	88950947	chr12	88972616	88975371	3	3.84865e-11	No	Yes	uc001tav.2;KITLG;chr12:88969238-88979238;uc001taw.2;KITLG;chr12:88969238-88979238;
chr12:88964679-88974887	10208	chr12	88964679	88968427	chr12	88969730	88974887	6	1.00903e-21	No	Yes	uc001tav.2;KITLG;chr12:88969238-88979238;uc001taw.2;KITLG;chr12:88969238-88979238;
chr12:89454567-89748670	294103	chr12	89454567	89459490	chr12	89743230	89748670	5	1.92708e-15	No	Yes	uc001tay.2;DUSP6;chr12:89741296-89751296;uc001taz.2;DUSP6;chr12:89741296-89751296;
chr12:89529982-89748779	218797	chr12	89529982	89533091	chr12	89746446	89748779	3	1.84182e-10	No	Yes	uc001tay.2;DUSP6;chr12:89741296-89751296;uc001taz.2;DUSP6;chr12:89741296-89751296;
chr12:89552518-89748873	196355	chr12	89552518	89557876	chr12	89745463	89748873	6	1.84994e-17	No	Yes	uc001tay.2;DUSP6;chr12:89741296-89751296;uc001taz.2;DUSP6;chr12:89741296-89751296;
chr12:89573060-89748305	175245	chr12	89573060	89577566	chr12	89744633	89748305	6	5.28797e-18	No	Yes	uc001tay.2;DUSP6;chr12:89741296-89751296;uc001taz.2;DUSP6;chr12:89741296-89751296;
chr12:89577999-89749764	171765	chr12	89577999	89581129	chr12	89746321	89749764	5	7.86217e-16	No	Yes	uc001tay.2;DUSP6;chr12:89741296-89751296;uc001taz.2;DUSP6;chr12:89741296-89751296;
chr12:89617699-89749888	132189	chr12	89617699	89626774	chr12	89744261	89749888	11	6.89097e-30	No	Yes	uc001tay.2;DUSP6;chr12:89741296-89751296;uc001taz.2;DUSP6;chr12:89741296-89751296;
chr12:89630007-89748808	118801	chr12	89630007	89633001	chr12	89745760	89748808	5	1.86654e-15	No	Yes	uc001tay.2;DUSP6;chr12:89741296-89751296;uc001taz.2;DUSP6;chr12:89741296-89751296;
chr12:89720194-89748965	28771	chr12	89720194	89725566	chr12	89745572	89748965	4	4.05655e-12	No	Yes	uc001tay.2;DUSP6;chr12:89741296-89751296;uc001taz.2;DUSP6;chr12:89741296-89751296;
chr12:89728241-89749999	21758	chr12	89728241	89734375	chr12	89745799	89749999	6	1.97267e-18	No	Yes	uc001tay.2;DUSP6;chr12:89741296-89751296;uc001taz.2;DUSP6;chr12:89741296-89751296;
chr12:89735631-89749688	14057	chr12	89735631	89739932	chr12	89745142	89749688	4	2.92601e-12	No	Yes	uc001tay.2;DUSP6;chr12:89741296-89751296;uc001taz.2;DUSP6;chr12:89741296-89751296;
chr12:89857139-89922708	65569	chr12	89857139	89862035	chr12	89916379	89922708	11	1.08148e-36	No	Yes	uc001tba.2;WDR51B;chr12:89914340-89924340;uc001tbb.2;TUWD12;chr12:89914340-89924340;uc001tbc.2;WDR51B;chr12:89914777-89924777;uc010sun.1;TUWD12;chr12:89914777-89924777;uc001tbd.2;GALNT4;chr12:89913535-89923535;uc001tbe.2;GALNT4;chr12:89914777-89924777;uc010suo.1;GALNT4;chr12:89914777-89924777;
chr12:89879344-89920396	41052	chr12	89879344	89884109	chr12	89917110	89920396	4	2.98132e-14	No	Yes	uc001tba.2;WDR51B;chr12:89914340-89924340;uc001tbb.2;TUWD12;chr12:89914340-89924340;uc001tbc.2;WDR51B;chr12:89914777-89924777;uc010sun.1;TUWD12;chr12:89914777-89924777;uc001tbd.2;GALNT4;chr12:89913535-89923535;uc001tbe.2;GALNT4;chr12:89914777-89924777;uc010suo.1;GALNT4;chr12:89914777-89924777;
chr12:89900365-89918662	18297	chr12	89900365	89902833	chr12	89915960	89918662	3	2.65645e-11	No	Yes	uc001tba.2;WDR51B;chr12:89914340-89924340;uc001tbb.2;TUWD12;chr12:89914340-89924340;uc001tbc.2;WDR51B;chr12:89914777-89924777;uc010sun.1;TUWD12;chr12:89914777-89924777;uc001tbd.2;GALNT4;chr12:89913535-89923535;uc001tbe.2;GALNT4;chr12:89914777-89924777;uc010suo.1;GALNT4;chr12:89914777-89924777;
chr12:89958736-90105186	146450	chr12	89958736	89961613	chr12	90101312	90105186	4	1.87642e-12	No	Yes	uc001tbi.3;LOC338758;chr12:90097731-90107731;
chr12:91773944-92540623	766679	chr12	91773944	91778269	chr12	92537071	92540623	5	3.56288e-14	No	Yes	uc001tbv.1;BC118985;chr12:92531444-92541444;uc001tbw.1;BC122534;chr12:92531444-92541444;uc001tbx.1;BC107595;chr12:92531444-92541444;uc009zss.1;AK055439;chr12:92531444-92541444;uc001tby.3;BTG1;chr12:92534673-92544673;uc001tca.2;BC044741;chr12:92534860-92544860;
chr12:91779318-92540423	761105	chr12	91779318	91783028	chr12	92536861	92540423	6	3.85125e-18	No	Yes	uc001tbv.1;BC118985;chr12:92531444-92541444;uc001tbw.1;BC122534;chr12:92531444-92541444;uc001tbx.1;BC107595;chr12:92531444-92541444;uc009zss.1;AK055439;chr12:92531444-92541444;uc001tby.3;BTG1;chr12:92534673-92544673;uc001tca.2;BC044741;chr12:92534860-92544860;
chr12:92203065-92540998	337933	chr12	92203065	92206370	chr12	92538091	92540998	5	3.95811e-17	No	Yes	uc001tbv.1;BC118985;chr12:92531444-92541444;uc001tbw.1;BC122534;chr12:92531444-92541444;uc001tbx.1;BC107595;chr12:92531444-92541444;uc009zss.1;AK055439;chr12:92531444-92541444;uc001tby.3;BTG1;chr12:92534673-92544673;uc001tca.2;BC044741;chr12:92534860-92544860;
chr12:93226039-93323889	97850	chr12	93226039	93229456	chr12	93322124	93323889	3	2.09614e-11	No	Yes	uc001tck.2;EEA1;chr12:93318107-93328107;
chr12:93933232-93965151	31919	chr12	93933232	93937198	chr12	93962828	93965151	5	4.96424e-17	No	Yes	uc001tcv.1;AK054607;chr12:93960544-93970544;uc001tcu.2;AK098304;chr12:93960544-93970544;uc001tcw.1;SOCS2;chr12:93958597-93968597;uc001tcx.1;SOCS2;chr12:93959174-93969174;uc009zsu.2;AK309452;chr12:93959828-93969828;uc001tcy.1;SOCS2;chr12:93960480-93970480;uc001tcz.2;BC070039;chr12:93960480-93970480;
chr12:95711947-95868654	156707	chr12	95711947	95716782	chr12	95865529	95868654	4	1.77338e-13	No	Yes	uc001tec.2;METAP2;chr12:95862821-95872821;uc010suv.1;METAP2;chr12:95862821-95872821;uc009ztd.2;METAP2;chr12:95862821-95872821;uc001ted.2;METAP2;chr12:95862821-95872821;uc001tef.2;METAP2;chr12:95862821-95872821;uc001tee.2;METAP2;chr12:95862821-95872821;
chr12:96359001-96393745	34744	chr12	96359001	96361520	chr12	96390717	96393745	3	6.04044e-14	No	Yes	uc001tem.1;HAL;chr12:96385071-96395071;uc009zti.1;HAL;chr12:96385071-96395071;uc010suw.1;HAL;chr12:96385071-96395071;uc010sux.1;HAL;chr12:96385071-96395071;
chr12:96609962-96795502	185540	chr12	96609962	96615359	chr12	96791677	96795502	5	3.9822e-14	No	Yes	uc001tep.1;PCTK2;chr12:96789223-96799223;uc009ztk.2;PCTK2;chr12:96789223-96799223;uc010svb.1;PCTK2;chr12:96789223-96799223;
chr12:97878510-97963724	85214	chr12	97878510	97881142	chr12	97960554	97963724	4	9.65206e-16	No	Yes	uc001tfb.2;DM004219;chr12:97952589-97962589;
chr12:98138847-98147404	8557	chr12	98138847	98141493	chr12	98143340	98147404	3	1.00759e-13	No	Yes	uc001tfc.1;AK098641;chr12:98142376-98152376;uc001tfd.2;BC024008;chr12:98145295-98155295;
chr12:100623146-100662304	39158	chr12	100623146	100625419	chr12	100658418	100662304	3	4.51032e-11	No	Yes	uc001thh.1;DEPDC4;chr12:100655857-100665857;uc001thi.2;DEPDC4;chr12:100655857-100665857;uc001thj.1;DEPDC4;chr12:100655857-100665857;uc009ztv.1;DEPDC4;chr12:100655857-100665857;uc001thk.1;DEPDC4;chr12:100655857-100665857;uc001thl.1;DEPDC4;chr12:100655857-100665857;uc009ztw.1;SCYL2;chr12:100655954-100665954;uc001thm.1;SCYL2;chr12:100655954-100665954;uc001thn.2;SCYL2;chr12:100656548-100666548;
chr12:104193794-104230835	37041	chr12	104193794	104196589	chr12	104226529	104230835	4	5.02752e-17	No	Yes	uc010swe.1;NT5DC3;chr12:104229975-104239975;
chr12:105349138-105383582	34444	chr12	105349138	105353350	chr12	105380237	105383582	4	2.85249e-13	No	Yes	uc001tlb.2;C12orf45;chr12:105375097-105385097;
chr12:105351138-105380234	29096	chr12	105351138	105353772	chr12	105378582	105380234	3	2.00233e-10	No	Yes	uc001tlb.2;C12orf45;chr12:105375097-105385097;
chr12:105358604-105382753	24149	chr12	105358604	105363045	chr12	105378560	105382753	4	2.3229e-15	No	Yes	uc001tlb.2;C12orf45;chr12:105375097-105385097;
chr12:105813159-106533790	720631	chr12	105813159	105815019	chr12	106530555	106533790	3	8.97197e-11	No	Yes	uc001tlj.1;NUAK1;chr12:106528811-106538811;
chr12:105837457-106535531	698074	chr12	105837457	105842094	chr12	106531449	106535531	7	4.64702e-23	No	Yes	uc001tlj.1;NUAK1;chr12:106528811-106538811;
chr12:106134598-106534871	400273	chr12	106134598	106137615	chr12	106531407	106534871	3	2.37963e-10	No	Yes	uc001tlj.1;NUAK1;chr12:106528811-106538811;
chr12:106167188-106534046	366858	chr12	106167188	106170393	chr12	106530093	106534046	5	1.06117e-16	No	Yes	uc001tlj.1;NUAK1;chr12:106528811-106538811;
chr12:106253022-106534147	281125	chr12	106253022	106256354	chr12	106530460	106534147	5	2.40808e-14	No	Yes	uc001tlj.1;NUAK1;chr12:106528811-106538811;
chr12:106326499-106534417	207918	chr12	106326499	106332666	chr12	106530301	106534417	9	1.10573e-26	No	Yes	uc001tlj.1;NUAK1;chr12:106528811-106538811;
chr12:106468935-106534405	65470	chr12	106468935	106470913	chr12	106531635	106534405	3	4.69214e-11	No	Yes	uc001tlj.1;NUAK1;chr12:106528811-106538811;
chr12:106505826-106534995	29169	chr12	106505826	106508557	chr12	106531919	106534995	3	6.59845e-10	No	Yes	uc001tlj.1;NUAK1;chr12:106528811-106538811;
chr12:106517490-106529897	12407	chr12	106517490	106522958	chr12	106525494	106529897	7	4.03289e-27	No	Yes	uc001tlj.1;NUAK1;chr12:106528811-106538811;
chr12:106518999-106534329	15330	chr12	106518999	106524093	chr12	106530118	106534329	8	5.46768e-26	No	Yes	uc001tlj.1;NUAK1;chr12:106528811-106538811;
chr12:106617619-106752631	135012	chr12	106617619	106621663	chr12	106750007	106752631	4	2.68625e-13	No	Yes	uc001tlp.2;POLR3B;chr12:106746435-106756435;uc001tlq.2;POLR3B;chr12:106746859-106756859;
chr12:106618176-106644031	25855	chr12	106618176	106623447	chr12	106639085	106644031	7	2.17379e-22	No	Yes	uc001tlk.2;CKAP4;chr12:106636713-106646713;
chr12:106671489-106752897	81408	chr12	106671489	106676202	chr12	106750086	106752897	6	1.30402e-19	No	Yes	uc001tlp.2;POLR3B;chr12:106746435-106756435;uc001tlq.2;POLR3B;chr12:106746859-106756859;
chr12:106740945-106753428	12483	chr12	106740945	106746236	chr12	106747854	106753428	6	3.62722e-20	No	Yes	uc001tlp.2;POLR3B;chr12:106746435-106756435;uc001tlq.2;POLR3B;chr12:106746859-106756859;
chr12:107534238-107714060	179822	chr12	107534238	107537732	chr12	107710298	107714060	3	1.38559e-12	No	Yes	uc009zut.1;BTBD11;chr12:107707196-107717196;uc001tmj.2;BTBD11;chr12:107707196-107717196;uc001tmk.1;BTBD11;chr12:107707196-107717196;
chr12:110032927-110154120	121193	chr12	110032927	110038716	chr12	110149893	110154120	6	3.32321e-19	No	Yes	uc001tpd.1;C12orf34;chr12:110147189-110157189;
chr12:110135377-110153380	18003	chr12	110135377	110137584	chr12	110150490	110153380	3	2.43419e-11	No	Yes	uc001tpd.1;C12orf34;chr12:110147189-110157189;
chr12:110258925-110271354	12429	chr12	110258925	110262714	chr12	110265040	110271354	5	2.2207e-19	No	Yes	uc001tpk.1;TRPV4;chr12:110266212-110276212;uc001tpl.1;TRPV4;chr12:110266212-110276212;
chr12:110300071-110320101	20030	chr12	110300071	110302636	chr12	110316925	110320101	3	1.54449e-11	No	Yes	uc001tpm.2;GLTP;chr12:110313293-110323293;uc010sxt.1;GLTP;chr12:110313293-110323293;
chr12:112388262-112453695	65433	chr12	112388262	112391570	chr12	112449522	112453695	4	1.76662e-15	No	Yes	uc001ttc.1;TMEM116;chr12:112445935-112455935;uc001ttd.1;TMEM116;chr12:112445935-112455935;uc001tte.1;TMEM116;chr12:112445935-112455935;uc001ttf.1;TMEM116;chr12:112445935-112455935;uc001ttg.1;TMEM116;chr12:112445935-112455935;uc001tth.1;TMEM116;chr12:112445935-112455935;uc001tti.1;TMEM116;chr12:112445935-112455935;uc001ttj.1;AX747754;chr12:112445989-112455989;uc001ttk.1;ERP29;chr12:112446151-11245…
chr12:112626966-112848098	221132	chr12	112626966	112629542	chr12	112845100	112848098	3	5.17095e-10	No	Yes	uc001ttu.2;RPL6;chr12:112842443-112852443;uc001ttv.2;RPL6;chr12:112842443-112852443;uc009zwd.1;RPL6;chr12:112842443-112852443;
chr12:112632347-112849781	217434	chr12	112632347	112634333	chr12	112845584	112849781	3	5.19029e-11	No	Yes	uc001ttu.2;RPL6;chr12:112842443-112852443;uc001ttv.2;RPL6;chr12:112842443-112852443;uc009zwd.1;RPL6;chr12:112842443-112852443;
chr12:113557617-113571876	14259	chr12	113557617	113561015	chr12	113568656	113571876	3	2.28093e-12	No	Yes	uc010syp.1;RASAL1;chr12:113568404-113578404;uc001tul.2;RASAL1;chr12:113568555-113578555;uc001tum.1;RASAL1;chr12:113569021-113579021;uc001tun.1;RASAL1;chr12:113569029-113579029;uc010syq.1;RASAL1;chr12:113569021-113579021;uc001tuo.3;RASAL1;chr12:113568555-113578555;uc010syr.1;RASAL1;chr12:113568555-113578555;
chr12:113632123-113663333	31210	chr12	113632123	113635333	chr12	113658420	113663333	6	2.64023e-18	No	Yes	uc001tuu.2;IQCD;chr12:113653880-113663880;uc001tuv.1;IQCD;chr12:113653880-113663880;uc001tux.2;TPCN1;chr12:113654259-113664259;uc001tuw.2;TPCN1;chr12:113654259-113664259;
chr12:113644194-113683651	39457	chr12	113644194	113646761	chr12	113679730	113683651	3	1.17978e-11	No	Yes	uc010syt.1;KIAA1169;chr12:113677255-113687255;
chr12:115109488-115118707	9219	chr12	115109488	115112372	chr12	115116136	115118707	3	5.35326e-14	No	Yes	uc001tvt.1;TBX3;chr12:115116969-115126969;uc001tvu.1;TBX3;chr12:115116969-115126969;uc010syw.1;TBX3;chr12:115116969-115126969;
chr12:115112685-115122744	10059	chr12	115112685	115114732	chr12	115120461	115122744	3	8.11707e-12	No	Yes	uc001tvt.1;TBX3;chr12:115116969-115126969;uc001tvu.1;TBX3;chr12:115116969-115126969;uc010syw.1;TBX3;chr12:115116969-115126969;
chr12:117256194-117315845	59651	chr12	117256194	117258778	chr12	117314042	117315845	3	4.8082e-13	No	Yes	uc001twe.2;HRK;chr12:117314232-117324232;
chr12:118339558-118407102	67544	chr12	118339558	118342528	chr12	118404819	118407102	3	3.00149e-12	No	Yes	uc001two.2;KSR2;chr12:118401028-118411028;
chr12:118389753-118408608	18855	chr12	118389753	118392958	chr12	118405398	118408608	3	2.37324e-11	No	Yes	uc001two.2;KSR2;chr12:118401028-118411028;
chr12:118601731-118815749	214018	chr12	118601731	118605413	chr12	118811549	118815749	6	8.80019e-23	No	Yes	uc001twy.3;TAOK3;chr12:118805750-118815750;uc001twz.2;SUDS3;chr12:118809357-118819357;
chr12:118709106-118813742	104636	chr12	118709106	118711234	chr12	118810302	118813742	3	7.43332e-11	No	Yes	uc001twy.3;TAOK3;chr12:118805750-118815750;uc001twz.2;SUDS3;chr12:118809357-118819357;
chr12:119605629-119619988	14359	chr12	119605629	119607535	chr12	119616607	119619988	3	5.93448e-12	No	Yes	uc001txb.2;HSPB8;chr12:119611594-119621594;uc001txc.2;HSPB8;chr12:119611594-119621594;
chr12:120208689-120245374	36685	chr12	120208689	120211170	chr12	120242508	120245374	3	3.88609e-14	No	Yes	uc001txh.1;CIT;chr12:120237282-120247282;
chr12:120514645-120556638	41993	chr12	120514645	120518172	chr12	120553447	120556638	5	7.12184e-14	No	Yes	uc001txm.1;RAB35;chr12:120549599-120559599;uc009zww.1;RAB35;chr12:120549599-120559599;uc010szh.1;RAB35;chr12:120549599-120559599;uc001txn.1;AK130486;chr12:120549710-120559710;
chr12:120515805-120539691	23886	chr12	120515805	120518721	chr12	120536191	120539691	3	4.18031e-10	No	Yes	uc010szg.1;RAB35;chr12:120531965-120541965;
chr12:120729818-122250047	1520229	chr12	120729818	120731411	chr12	122247604	122250047	3	7.07846e-06	No	Yes	uc001ubi.2;SETD1B;chr12:122237629-122247629;
chr12:120753412-120908096	154684	chr12	120753412	120756124	chr12	120906099	120908096	3	1.32506e-08	No	Yes	uc001tyi.2;SFRS9;chr12:120902558-120912558;uc009zwy.2;SFRS9;chr12:120902558-120912558;uc001tyj.2;DYNLL1;chr12:120902659-120912659;
chr12:120754063-120934735	180672	chr12	120754063	120756427	chr12	120932274	120934735	3	1.20828e-08	No	Yes	uc001tyk.1;BX537644;chr12:120928728-120938728;uc001tyl.2;DYNLL1;chr12:120928858-120938858;uc001tym.2;DYNLL1;chr12:120928858-120938858;
chr12:120798208-120875660	77452	chr12	120798208	120800958	chr12	120872318	120875660	3	5.28702e-13	No	Yes	uc001tyf.1;COX6A1;chr12:120870903-120880903;
chr12:121931595-122065952	134357	chr12	121931595	121935193	chr12	122063683	122065952	3	9.18455e-11	No	Yes	uc010szz.1;ORAI1;chr12:122059454-122069454;
chr12:121974810-122239422	264612	chr12	121974810	121976577	chr12	122237441	122239422	3	7.89385e-07	No	Yes	uc001ube.3;LOC338799;chr12:122236390-122246390;uc001ubf.2;AK095700;chr12:122230736-122240736;uc009zxi.1;LOC338799;chr12:122235852-122245852;uc001ubg.2;SETD1B;chr12:122237085-122247085;uc001ubi.2;SETD1B;chr12:122237629-122247629;
chr12:122123518-122233939	110421	chr12	122123518	122126727	chr12	122231097	122233939	3	1.91635e-09	No	Yes	uc001ubb.2;RHOF;chr12:122226594-122236594;uc001ubd.3;RHOF;chr12:122226594-122236594;uc001ubf.2;AK095700;chr12:122230736-122240736;
chr12:122190885-122240241	49356	chr12	122190885	122194340	chr12	122235096	122240241	5	8.10224e-13	No	Yes	uc001ubb.2;RHOF;chr12:122226594-122236594;uc001ubd.3;RHOF;chr12:122226594-122236594;uc001ube.3;LOC338799;chr12:122236390-122246390;uc001ubf.2;AK095700;chr12:122230736-122240736;uc009zxi.1;LOC338799;chr12:122235852-122245852;uc001ubg.2;SETD1B;chr12:122237085-122247085;uc001ubi.2;SETD1B;chr12:122237629-122247629;
chr12:122263314-122328455	65141	chr12	122263314	122265350	chr12	122325575	122328455	3	2.09286e-10	No	Yes	uc001ubk.2;HPD;chr12:122321517-122331517;uc001ubl.2;PSMD9;chr12:122321645-122331645;uc009zxj.2;PSMD9;chr12:122321645-122331645;uc001ubm.2;PSMD9;chr12:122321645-122331645;
chr12:122437989-122461657	23668	chr12	122437989	122441020	chr12	122459413	122461657	5	1.25968e-18	No	Yes	uc001ubo.2;BCL7A;chr12:122454860-122464860;uc001ubp.2;BCL7A;chr12:122454860-122464860;
chr12:123120054-123237075	117021	chr12	123120054	123123996	chr12	123234682	123237075	4	1.91914e-16	No	Yes	uc010tag.1;DENR;chr12:123232370-123242370;uc001uda.2;DENR;chr12:123232370-123242370;uc001udb.2;DENR;chr12:123232370-123242370;
chr12:123305427-123322774	17347	chr12	123305427	123307833	chr12	123319941	123322774	3	1.20162e-11	No	Yes	uc001udg.1;HIP1R;chr12:123314294-123324294;uc001udh.2;KIAA0655;chr12:123315038-123325038;uc001udi.1;HIP1R;chr12:123315038-123325038;uc001udj.1;HIP1R;chr12:123315038-123325038;
chr12:123526656-123636869	110213	chr12	123526656	123529148	chr12	123634939	123636869	3	8.60455e-12	No	Yes	uc001uek.1;PITPNM2;chr12:123630285-123640285;
chr12:123825267-123850048	24781	chr12	123825267	123827807	chr12	123847283	123850048	4	1.85977e-15	No	Yes	uc001uet.2;SBNO1;chr12:123844388-123854388;uc001ueu.2;SBNO1;chr12:123844388-123854388;uc001uev.2;SBNO1;chr12:123844388-123854388;uc009zxy.1;SBNO1;chr12:123844388-123854388;
chr12:123930599-123944505	13906	chr12	123930599	123932648	chr12	123941951	123944505	3	1.44884e-11	No	Yes	uc009zxz.2;SNRNP35;chr12:123937650-123947650;uc010tar.1;SNRNP35;chr12:123937650-123947650;uc001ufb.1;SNRNP35;chr12:123937650-123947650;uc001ufc.1;SNRNP35;chr12:123937650-123947650;
chr12:124056886-124069927	13041	chr12	124056886	124060484	chr12	124067247	124069927	5	9.81377e-18	No	Yes	uc001ufg.2;TMED2;chr12:124064075-124074075;
chr12:124283717-124459297	175580	chr12	124283717	124287510	chr12	124455841	124459297	3	4.81672e-10	No	Yes	uc001ufw.1;CCDC92;chr12:124452163-124462163;uc001ufx.1;CCDC92;chr12:124452163-124462163;uc001ufy.1;CCDC92;chr12:124452163-124462163;uc001ufz.2;ZNF664;chr12:124452669-124462669;uc001uga.2;ZNF664;chr12:124452779-124462779;uc001ugb.2;ZNF664;chr12:124452830-124462830;
chr12:124399326-124410878	11552	chr12	124399326	124401527	chr12	124406576	124410878	3	2.26244e-14	No	Yes	uc001ufu.3;KIAA2017;chr12:124404596-124414596;
chr12:124871909-125053292	181383	chr12	124871909	124876948	chr12	125048974	125053292	8	2.04132e-24	No	Yes	uc001ugj.1;NCOR2;chr12:125047010-125057010;
chr12:124905130-125003643	98513	chr12	124905130	124909323	chr12	125000969	125003643	3	1.16697e-09	No	Yes	uc001ugk.1;NCOR2;chr12:124997840-125007840;
chr12:124906822-124965581	58759	chr12	124906822	124908543	chr12	124962851	124965581	3	4.51411e-11	No	Yes	uc001ugl.2;BC017209;chr12:124963242-124973242;
chr12:124914166-125052566	138400	chr12	124914166	124916772	chr12	125050486	125052566	3	1.21773e-11	No	Yes	uc001ugj.1;NCOR2;chr12:125047010-125057010;
chr12:125538469-125550625	12156	chr12	125538469	125542731	chr12	125547333	125550625	4	2.44053e-15	No	Yes	uc009zyg.2;DKFZp666F229;chr12:125544924-125554924;uc001uhc.2;AACS;chr12:125544924-125554924;uc001uhd.2;AACS;chr12:125544924-125554924;
chr12:129278451-129310666	32215	chr12	129278451	129281102	chr12	129306690	129310666	5	7.43052e-18	No	Yes	uc001uhu.2;SLC15A4;chr12:129303541-129313541;uc001uhv.2;FP12591;chr12:129303541-129313541;
chr12:131243831-131357274	113443	chr12	131243831	131247348	chr12	131354294	131357274	4	3.49945e-13	No	Yes	uc001uir.2;RAN;chr12:131351616-131361616;uc010tbk.1;RAN;chr12:131351616-131361616;uc010tbl.1;OK/SW-cl.81;chr12:131351616-131361616;uc001uis.2;RAN;chr12:131351782-131361782;
chr12:131402000-131515512	113512	chr12	131402000	131404671	chr12	131512600	131515512	3	2.58615e-13	No	Yes	uc001uiu.1;AX748157;chr12:131507357-131517357;
chr12:131617114-132314325	697211	chr12	131617114	131621063	chr12	132311711	132314325	3	5.58702e-11	No	Yes	uc001ujc.1;MMP17;chr12:132307940-132317940;
chr12:132220729-132315504	94775	chr12	132220729	132223495	chr12	132312967	132315504	3	8.0844e-10	No	Yes	uc001ujc.1;MMP17;chr12:132307940-132317940;
chr12:132280944-132314685	33741	chr12	132280944	132283609	chr12	132312946	132314685	3	6.07503e-12	No	Yes	uc001ujc.1;MMP17;chr12:132307940-132317940;
chr12:132333327-132436130	102803	chr12	132333327	132336795	chr12	132433107	132436130	4	2.06775e-13	No	Yes	uc001ujj.1;KIAA1498;chr12:132429507-132439507;uc001ujk.2;EP400;chr12:132429507-132439507;uc001ujl.2;EP400;chr12:132429507-132439507;
chr12:132343779-132436424	92645	chr12	132343779	132348375	chr12	132433702	132436424	4	1.82988e-10	No	Yes	uc001ujj.1;KIAA1498;chr12:132429507-132439507;uc001ujk.2;EP400;chr12:132429507-132439507;uc001ujl.2;EP400;chr12:132429507-132439507;
chr12:132354484-132409015	54531	chr12	132354484	132358211	chr12	132405498	132409015	3	2.06875e-09	No	Yes	uc001ujg.2;PUS1;chr12:132408788-132418788;uc001ujf.2;PUS1;chr12:132408788-132418788;uc001ujh.2;PUS1;chr12:132408788-132418788;
chr12:132354536-132414794	60258	chr12	132354536	132358604	chr12	132411783	132414794	6	8.52232e-16	No	Yes	uc001ujg.2;PUS1;chr12:132408788-132418788;uc001ujf.2;PUS1;chr12:132408788-132418788;uc001ujh.2;PUS1;chr12:132408788-132418788;uc001uji.2;PUS1;chr12:132411059-132421059;
chr12:132361893-132381014	19121	chr12	132361893	132363872	chr12	132379039	132381014	3	6.0422e-10	No	Yes	uc001uje.2;ULK1;chr12:132374278-132384278;
chr12:133442288-133460730	18442	chr12	133442288	133445846	chr12	133457481	133460730	3	2.17131e-13	No	Yes	uc001ulc.1;DKFZp434N2420;chr12:133449240-133459240;uc001ule.2;CHFR;chr12:133459204-133469204;uc001ulf.2;CHFR;chr12:133459204-133469204;uc010tbs.1;CHFR;chr12:133459204-133469204;uc001uld.2;CHFR;chr12:133459204-133469204;uc010tbt.1;CHFR;chr12:133459204-133469204;
chr12:133548404-133564478	16074	chr12	133548404	133550511	chr12	133561785	133564478	3	1.59936e-12	No	Yes	uc001ull.1;ZNF26;chr12:133558055-133568055;
chr12:133600250-133615751	15501	chr12	133600250	133603467	chr12	133612457	133615751	4	9.84295e-15	No	Yes	uc001ulm.3;ZNF84;chr12:133608877-133618877;uc009zyy.2;ZNF84;chr12:133608877-133618877;uc009zyz.2;ZNF84;chr12:133608979-133618979;uc009zza.2;ZNF84;chr12:133609412-133619412;
chr13:20198290-20207384	9094	chr13	20198290	20200647	chr13	20204408	20207384	3	1.61505e-13	No	Yes	uc001umf.1;MPHOSPH8;chr13:20202879-20212879;uc001umg.2;MPHOSPH8;chr13:20202879-20212879;uc001umh.2;MPHOSPH8;chr13:20202879-20212879;
chr13:20239046-20439683	200637	chr13	20239046	20241515	chr13	20436477	20439683	3	1.55654e-09	No	Yes	uc010tcn.1;ZMYM5;chr13:20432776-20442776;uc001umn.2;ZMYM5;chr13:20432776-20442776;uc001umo.2;ZMYM5;chr13:20432776-20442776;uc001ump.2;BC024195;chr13:20433012-20443012;
chr13:20298606-20358464	59858	chr13	20298606	20302433	chr13	20355350	20358464	4	2.80622e-14	No	Yes	uc001umj.1;PSPC1;chr13:20352083-20362083;uc001umk.1;PSPC1;chr13:20352083-20362083;uc001uml.2;PSPC1;chr13:20352083-20362083;
chr13:20485410-20533947	48537	chr13	20485410	20489684	chr13	20529700	20533947	4	3.39059e-12	No	Yes	uc001umq.2;ZMYM2;chr13:20527809-20537809;uc001umr.2;ZMYM2;chr13:20527809-20537809;uc001ums.2;ZMYM2;chr13:20527809-20537809;uc001umt.2;ZMYM2;chr13:20527973-20537973;uc009zzn.1;ZMYM2;chr13:20528998-20538998;
chr13:20499973-20535353	35380	chr13	20499973	20505946	chr13	20530548	20535353	10	1.19092e-31	No	Yes	uc001umq.2;ZMYM2;chr13:20527809-20537809;uc001umr.2;ZMYM2;chr13:20527809-20537809;uc001ums.2;ZMYM2;chr13:20527809-20537809;uc001umt.2;ZMYM2;chr13:20527973-20537973;uc009zzn.1;ZMYM2;chr13:20528998-20538998;
chr13:20509691-20534356	24665	chr13	20509691	20514169	chr13	20530867	20534356	8	3.40448e-26	No	Yes	uc001umq.2;ZMYM2;chr13:20527809-20537809;uc001umr.2;ZMYM2;chr13:20527809-20537809;uc001ums.2;ZMYM2;chr13:20527809-20537809;uc001umt.2;ZMYM2;chr13:20527973-20537973;uc009zzn.1;ZMYM2;chr13:20528998-20538998;
chr13:20517075-20534503	17428	chr13	20517075	20519965	chr13	20531362	20534503	4	9.97242e-13	No	Yes	uc001umq.2;ZMYM2;chr13:20527809-20537809;uc001umr.2;ZMYM2;chr13:20527809-20537809;uc001ums.2;ZMYM2;chr13:20527809-20537809;uc001umt.2;ZMYM2;chr13:20527973-20537973;uc009zzn.1;ZMYM2;chr13:20528998-20538998;
chr13:20700565-20739192	38627	chr13	20700565	20704391	chr13	20735024	20739192	8	3.70646e-29	No	Yes	uc001umx.1;GJA3;chr13:20730183-20740183;
chr13:21068977-21279323	210346	chr13	21068977	21071986	chr13	21276497	21279323	3	2.81125e-10	No	Yes	uc001unm.2;IL17D;chr13:21272481-21282481;
chr13:21077947-21280305	202358	chr13	21077947	21082862	chr13	21275805	21280305	5	6.65929e-17	No	Yes	uc001unm.2;IL17D;chr13:21272481-21282481;
chr13:21259892-21278534	18642	chr13	21259892	21261749	chr13	21276073	21278534	3	1.87796e-11	No	Yes	uc001unm.2;IL17D;chr13:21272481-21282481;
chr13:21261839-21278856	17017	chr13	21261839	21266734	chr13	21275856	21278856	7	1.02136e-24	No	Yes	uc001unm.2;IL17D;chr13:21272481-21282481;
chr13:21284828-21349688	64860	chr13	21284828	21287698	chr13	21346450	21349688	3	1.32756e-10	No	Yes	uc001uno.1;N6AMT2;chr13:21343057-21353057;uc009zzr.1;N6AMT2;chr13:21343095-21353095;uc001unp.2;N6AMT2;chr13:21343095-21353095;
chr13:21457541-21477817	20276	chr13	21457541	21461517	chr13	21475426	21477817	4	4.76533e-14	No	Yes	uc001unq.3;XPO4;chr13:21471913-21481913;uc010tcr.1;KIAA1721;chr13:21471913-21481913;
chr13:21516349-21715480	199131	chr13	21516349	21520130	chr13	21713615	21715480	3	4.42539e-10	No	Yes	uc001uns.2;SAP18;chr13:21709652-21719652;
chr13:21587051-21637195	50144	chr13	21587051	21589271	chr13	21634195	21637195	3	2.89488e-11	No	Yes	uc009zzs.2;LATS2;chr13:21629429-21639429;uc001unr.3;LATS2;chr13:21630722-21640722;
chr13:21975719-22034206	58487	chr13	21975719	21979034	chr13	22031097	22034206	4	1.06633e-14	No	Yes	uc001uob.2;ZDHHC20;chr13:22028423-22038423;uc001uod.2;ZDHHC20;chr13:22028423-22038423;uc001uoc.2;ZDHHC20;chr13:22028423-22038423;uc001uoe.2;ZDHHC20;chr13:22028423-22038423;uc010tcs.1;ZDHHC20;chr13:22028423-22038423;
chr13:22154770-22179379	24609	chr13	22154770	22160109	chr13	22176442	22179379	6	3.02183e-20	No	Yes	uc001uof.2;EFHA1;chr13:22173307-22183307;
chr13:24648721-24737645	88924	chr13	24648721	24654032	chr13	24732856	24737645	9	3.96215e-31	No	Yes	uc001upf.1;SPATA13;chr13:24729886-24739886;uc001upg.1;SPATA13;chr13:24729886-24739886;
chr13:24697569-24737484	39915	chr13	24697569	24701658	chr13	24733406	24737484	5	5.88845e-17	No	Yes	uc001upf.1;SPATA13;chr13:24729886-24739886;uc001upg.1;SPATA13;chr13:24729886-24739886;
chr13:24721623-24736692	15069	chr13	24721623	24726335	chr13	24733443	24736692	6	4.15825e-20	No	Yes	uc001upf.1;SPATA13;chr13:24729886-24739886;uc001upg.1;SPATA13;chr13:24729886-24739886;
chr13:25656004-25665558	9554	chr13	25656004	25659742	chr13	25661468	25665558	3	8.02687e-14	No	Yes	uc001upy.2;PABPC3;chr13:25665275-25675275;
chr13:26554180-26626952	72772	chr13	26554180	26557164	chr13	26624477	26626952	3	1.38464e-11	No	Yes	uc001uqm.1;SHISA2;chr13:26620198-26630198;
chr13:26771029-26796803	25774	chr13	26771029	26774552	chr13	26794712	26796803	3	5.97099e-11	No	Yes	uc001uqn.1;RNF6;chr13:26791508-26801508;uc001uqo.2;RNF6;chr13:26790840-26800840;uc010aak.2;RNF6;chr13:26790978-26800978;uc001uqp.2;RNF6;chr13:26790978-26800978;uc001uqq.2;RNF6;chr13:26791508-26801508;uc010tdk.1;RNF6;chr13:26790978-26800978;
chr13:27537808-28026569	488761	chr13	27537808	27540361	chr13	28023174	28026569	3	5.51437e-11	No	Yes	uc001uri.2;MTIF3;chr13:28019325-28029325;uc001urj.2;MTIF3;chr13:28019711-28029711;uc001urk.2;MTIF3;chr13:28019711-28029711;
chr13:27574085-27827352	253267	chr13	27574085	27577169	chr13	27825498	27827352	3	1.47495e-11	No	Yes	uc001uqz.1;RPL21;chr13:27820691-27830691;uc001ura.2;RPL21;chr13:27820691-27830691;uc001urb.2;SNORD102;chr13:27824200-27834200;uc001urc.1;SNORA27;chr13:27824537-27834537;
chr13:27613407-27746136	132729	chr13	27613407	27616263	chr13	27743865	27746136	3	1.805e-11	No	Yes	uc001uqy.2;USP12;chr13:27741029-27751029;
chr13:27767873-27827351	59478	chr13	27767873	27770652	chr13	27824988	27827351	4	1.16063e-14	No	Yes	uc001uqz.1;RPL21;chr13:27820691-27830691;uc001ura.2;RPL21;chr13:27820691-27830691;uc001urb.2;SNORD102;chr13:27824200-27834200;uc001urc.1;SNORA27;chr13:27824537-27834537;
chr13:27946616-28026495	79879	chr13	27946616	27948846	chr13	28023927	28026495	4	9.15257e-14	No	Yes	uc001uri.2;MTIF3;chr13:28019325-28029325;uc001urj.2;MTIF3;chr13:28019711-28029711;uc001urk.2;MTIF3;chr13:28019711-28029711;
chr13:27951588-28026514	74926	chr13	27951588	27955644	chr13	28022595	28026514	5	3.14182e-17	No	Yes	uc001uri.2;MTIF3;chr13:28019325-28029325;uc001urj.2;MTIF3;chr13:28019711-28029711;uc001urk.2;MTIF3;chr13:28019711-28029711;
chr13:27964642-27999732	35090	chr13	27964642	27967643	chr13	27996960	27999732	3	7.83006e-12	No	Yes	uc001ure.2;GTF3A;chr13:27993680-28003680;uc001urf.2;GTF3A;chr13:27993680-28003680;uc001urg.2;GTF3A;chr13:27994547-28004547;
chr13:27982012-28026043	44031	chr13	27982012	27984328	chr13	28022677	28026043	3	9.51543e-11	No	Yes	uc001uri.2;MTIF3;chr13:28019325-28029325;uc001urj.2;MTIF3;chr13:28019711-28029711;uc001urk.2;MTIF3;chr13:28019711-28029711;
chr13:27983618-28001262	17644	chr13	27983618	27986332	chr13	27998264	28001262	3	2.79673e-11	No	Yes	uc001ure.2;GTF3A;chr13:27993680-28003680;uc001urf.2;GTF3A;chr13:27993680-28003680;uc001urg.2;GTF3A;chr13:27994547-28004547;
chr13:28050114-28196259	146145	chr13	28050114	28052025	chr13	28193263	28196259	3	2.02776e-09	No	Yes	uc001url.3;LNX2;chr13:28189720-28199720;uc001urm.1;LNX2;chr13:28190244-28200244;uc010tdm.1;POLR1D;chr13:28189894-28199894;uc010aam.2;POLR1D;chr13:28189894-28199894;uc001uro.2;POLR1D;chr13:28190899-28200899;uc001urp.2;POLR1D;chr13:28190899-28200899;uc001urq.2;POLR1D;chr13:28190899-28200899;
chr13:28122344-28197412	75068	chr13	28122344	28125264	chr13	28193985	28197412	4	7.11878e-13	No	Yes	uc001url.3;LNX2;chr13:28189720-28199720;uc001urm.1;LNX2;chr13:28190244-28200244;uc010tdm.1;POLR1D;chr13:28189894-28199894;uc010aam.2;POLR1D;chr13:28189894-28199894;uc001uro.2;POLR1D;chr13:28190899-28200899;uc001urp.2;POLR1D;chr13:28190899-28200899;uc001urq.2;POLR1D;chr13:28190899-28200899;
chr13:28126607-28196070	69463	chr13	28126607	28131675	chr13	28193876	28196070	5	3.80674e-16	No	Yes	uc001url.3;LNX2;chr13:28189720-28199720;uc001urm.1;LNX2;chr13:28190244-28200244;uc010tdm.1;POLR1D;chr13:28189894-28199894;uc010aam.2;POLR1D;chr13:28189894-28199894;uc001uro.2;POLR1D;chr13:28190899-28200899;uc001urp.2;POLR1D;chr13:28190899-28200899;uc001urq.2;POLR1D;chr13:28190899-28200899;
chr13:28146192-28197387	51195	chr13	28146192	28148725	chr13	28194955	28197387	3	2.74977e-10	No	Yes	uc001url.3;LNX2;chr13:28189720-28199720;uc001urm.1;LNX2;chr13:28190244-28200244;uc010tdm.1;POLR1D;chr13:28189894-28199894;uc010aam.2;POLR1D;chr13:28189894-28199894;uc001uro.2;POLR1D;chr13:28190899-28200899;uc001urp.2;POLR1D;chr13:28190899-28200899;uc001urq.2;POLR1D;chr13:28190899-28200899;
chr13:28157738-28196232	38494	chr13	28157738	28162991	chr13	28192868	28196232	4	2.5673e-12	No	Yes	uc001url.3;LNX2;chr13:28189720-28199720;uc001urm.1;LNX2;chr13:28190244-28200244;uc010tdm.1;POLR1D;chr13:28189894-28199894;uc010aam.2;POLR1D;chr13:28189894-28199894;uc001uro.2;POLR1D;chr13:28190899-28200899;uc001urp.2;POLR1D;chr13:28190899-28200899;uc001urq.2;POLR1D;chr13:28190899-28200899;
chr13:28165300-28196234	30934	chr13	28165300	28167717	chr13	28193203	28196234	4	1.98934e-13	No	Yes	uc001url.3;LNX2;chr13:28189720-28199720;uc001urm.1;LNX2;chr13:28190244-28200244;uc010tdm.1;POLR1D;chr13:28189894-28199894;uc010aam.2;POLR1D;chr13:28189894-28199894;uc001uro.2;POLR1D;chr13:28190899-28200899;uc001urp.2;POLR1D;chr13:28190899-28200899;uc001urq.2;POLR1D;chr13:28190899-28200899;
chr13:28664935-28713687	48752	chr13	28664935	28667904	chr13	28711949	28713687	3	1.89255e-11	No	Yes	uc010tdo.1;PAN3;chr13:28707642-28717642;
chr13:29268643-29293320	24677	chr13	29268643	29271629	chr13	29290111	29293320	3	1.86922e-12	No	Yes	uc001usg.2;SLC46A3;chr13:29284110-29294110;uc001usi.2;SLC46A3;chr13:29288105-29298105;uc001usj.2;SLC46A3;chr13:29288150-29298150;uc001ush.2;SLC46A3;chr13:29288150-29298150;uc001usk.2;SLC46A3;chr13:29284675-29294675;
chr13:29278413-29289256	10843	chr13	29278413	29282587	chr13	29285158	29289256	5	4.78775e-23	No	Yes	uc001usg.2;SLC46A3;chr13:29284110-29294110;uc001usi.2;SLC46A3;chr13:29288105-29298105;uc001usj.2;SLC46A3;chr13:29288150-29298150;uc001ush.2;SLC46A3;chr13:29288150-29298150;uc001usk.2;SLC46A3;chr13:29284675-29294675;
chr13:30124073-30170454	46381	chr13	30124073	30126477	chr13	30167606	30170454	3	9.43375e-11	No	Yes	uc001uso.2;SLC7A1;chr13:30164825-30174825;
chr13:30403000-30690620	287620	chr13	30403000	30404793	chr13	30686519	30690620	3	4.01838e-12	No	Yes	uc001usr.2;CR592782;chr13:30678005-30688005;
chr13:30407821-30425033	17212	chr13	30407821	30411668	chr13	30422825	30425033	3	1.75635e-10	No	Yes	uc001usp.2;UBL3;chr13:30419820-30429820;
chr13:30416529-30690547	274018	chr13	30416529	30418789	chr13	30687600	30690547	3	1.60371e-11	No	Yes	uc001usr.2;CR592782;chr13:30678005-30688005;
chr13:30495539-30690010	194471	chr13	30495539	30501420	chr13	30683250	30690010	13	5.10838e-40	No	Yes	uc001usr.2;CR592782;chr13:30678005-30688005;
chr13:30497791-30679278	181487	chr13	30497791	30500360	chr13	30674614	30679278	4	3.51478e-14	No	Yes	uc001usr.2;CR592782;chr13:30678005-30688005;
chr13:30498435-30683059	184624	chr13	30498435	30501654	chr13	30681390	30683059	3	8.58156e-12	No	Yes	uc001usr.2;CR592782;chr13:30678005-30688005;
chr13:30888078-31192551	304473	chr13	30888078	30890627	chr13	31190542	31192551	3	3.23564e-11	No	Yes	uc001usz.2;HMGB1;chr13:31186510-31196510;uc001utb.2;USPL1;chr13:31186829-31196829;uc001utc.2;USPL1;chr13:31186829-31196829;uc001utd.2;USPL1;chr13:31186829-31196829;
chr13:30969352-31040897	71545	chr13	30969352	30972567	chr13	31037950	31040897	3	1.41738e-09	No	Yes	uc001usv.2;HMG1L10;chr13:31033384-31043384;uc001usw.2;HMGB1;chr13:31034379-31044379;uc001usx.2;HMGB1;chr13:31035081-31045081;uc001usy.2;HMG1L1;chr13:31035081-31045081;uc001uta.1;HMG1L10;chr13:31035081-31045081;
chr13:31152614-31193152	40538	chr13	31152614	31155008	chr13	31190917	31193152	3	4.34351e-11	No	Yes	uc001usz.2;HMGB1;chr13:31186510-31196510;uc001utb.2;USPL1;chr13:31186829-31196829;uc001utc.2;USPL1;chr13:31186829-31196829;uc001utd.2;USPL1;chr13:31186829-31196829;
chr13:31623880-31736176	112296	chr13	31623880	31627971	chr13	31733703	31736176	4	5.15484e-14	No	Yes	uc001utj.2;HSPH1;chr13:31731117-31741117;uc001utk.2;HSPH1;chr13:31731117-31741117;uc010aaw.2;HSPH1;chr13:31731117-31741117;uc001utl.2;HSPH1;chr13:31731502-31741502;uc010tds.1;HSPH1;chr13:31731502-31741502;uc010tdt.1;HSP105;chr13:31731502-31741502;uc010aax.1;HSP105;chr13:31731502-31741502;uc010aay.1;HSP105;chr13:31731502-31741502;
chr13:31713024-31736951	23927	chr13	31713024	31715347	chr13	31734114	31736951	3	3.0531e-11	No	Yes	uc001utj.2;HSPH1;chr13:31731117-31741117;uc001utk.2;HSPH1;chr13:31731117-31741117;uc010aaw.2;HSPH1;chr13:31731117-31741117;uc001utl.2;HSPH1;chr13:31731502-31741502;uc010tds.1;HSPH1;chr13:31731502-31741502;uc010tdt.1;HSP105;chr13:31731502-31741502;uc010aax.1;HSP105;chr13:31731502-31741502;uc010aay.1;HSP105;chr13:31731502-31741502;
chr13:32500482-32520091	19609	chr13	32500482	32503139	chr13	32518153	32520091	3	1.04613e-13	No	Yes	uc001utv.2;DKFZp666K117;chr13:32519331-32529331;
chr13:32875434-32891140	15706	chr13	32875434	32879493	chr13	32887960	32891140	3	5.11596e-11	No	Yes	uc010abc.1;ZAR1L;chr13:32881091-32891091;uc001uua.1;BRCA2;chr13:32884616-32894616;uc001uub.1;BRCA2;chr13:32884616-32894616;
chr13:33836218-33861281	25063	chr13	33836218	33840765	chr13	33857421	33861281	5	9.71675e-20	No	Yes	uc001uuw.2;STARD13;chr13:33854901-33864901;uc010tec.1;STARD13;chr13:33854901-33864901;
chr13:34215590-34255376	39786	chr13	34215590	34219350	chr13	34250861	34255376	8	7.88381e-28	No	Yes	uc001uux.2;STARD13;chr13:34245932-34255932;
chr13:36689961-36705784	15823	chr13	36689961	36692662	chr13	36702708	36705784	3	2.555e-13	No	Yes	uc001uvf.2;DCLK1;chr13:36700464-36710464;
chr13:41025125-41242058	216933	chr13	41025125	41027720	chr13	41238869	41242058	3	4.58979e-10	No	Yes	uc001uxl.3;FOXO1;chr13:41235734-41245734;
chr13:41064038-41240609	176571	chr13	41064038	41066970	chr13	41238817	41240609	3	2.0552e-11	No	Yes	uc001uxl.3;FOXO1;chr13:41235734-41245734;
chr13:41068897-41241345	172448	chr13	41068897	41072503	chr13	41237409	41241345	3	5.19261e-10	No	Yes	uc001uxl.3;FOXO1;chr13:41235734-41245734;
chr13:41075593-41242540	166947	chr13	41075593	41084303	chr13	41237688	41242540	10	2.98824e-29	No	Yes	uc001uxl.3;FOXO1;chr13:41235734-41245734;
chr13:41111361-41241292	129931	chr13	41111361	41113276	chr13	41239277	41241292	3	8.80981e-11	No	Yes	uc001uxl.3;FOXO1;chr13:41235734-41245734;
chr13:41192114-41241279	49165	chr13	41192114	41194564	chr13	41237368	41241279	4	2.77076e-14	No	Yes	uc001uxl.3;FOXO1;chr13:41235734-41245734;
chr13:41506748-41638043	131295	chr13	41506748	41509375	chr13	41634921	41638043	3	3.75534e-10	No	Yes	uc001uxt.2;WBP4;chr13:41630696-41640696;uc010tfd.1;WBP4;chr13:41630696-41640696;
chr13:41536748-41636530	99782	chr13	41536748	41539797	chr13	41632527	41636530	7	3.1182e-23	No	Yes	uc001uxt.2;WBP4;chr13:41630696-41640696;uc010tfd.1;WBP4;chr13:41630696-41640696;
chr13:41566870-41637036	70166	chr13	41566870	41569725	chr13	41633851	41637036	4	9.98854e-12	No	Yes	uc001uxt.2;WBP4;chr13:41630696-41640696;uc010tfd.1;WBP4;chr13:41630696-41640696;
chr13:41613092-41635139	22047	chr13	41613092	41615279	chr13	41633530	41635139	3	8.35627e-12	No	Yes	uc001uxt.2;WBP4;chr13:41630696-41640696;uc010tfd.1;WBP4;chr13:41630696-41640696;
chr13:41872114-41886977	14863	chr13	41872114	41874506	chr13	41884128	41886977	3	4.66206e-12	No	Yes	uc001uye.3;NARG1L;chr13:41880340-41890340;uc001uyd.3;NARG1L;chr13:41880340-41890340;uc001uyf.2;NARG1L;chr13:41880340-41890340;uc010tfg.1;NARG1L;chr13:41880340-41890340;
chr13:42450735-42615707	164972	chr13	42450735	42453610	chr13	42613462	42615707	3	6.01114e-11	No	Yes	uc010tfh.1;DGKH;chr13:42609171-42619171;
chr13:42482857-42623947	141090	chr13	42482857	42486860	chr13	42621274	42623947	3	9.01813e-11	No	Yes	uc001uyl.1;DGKH;chr13:42617888-42627888;uc001uym.1;DGKH;chr13:42617888-42627888;
chr13:42483629-42536271	52642	chr13	42483629	42486557	chr13	42532161	42536271	4	1.68746e-15	No	Yes	uc001uyj.2;KIAA0564;chr13:42530221-42540221;uc001uyk.2;KIAA0564;chr13:42530221-42540221;
chr13:42510093-42536842	26749	chr13	42510093	42513784	chr13	42532724	42536842	4	2.83228e-15	No	Yes	uc001uyj.2;KIAA0564;chr13:42530221-42540221;uc001uyk.2;KIAA0564;chr13:42530221-42540221;
chr13:42514759-42536522	21763	chr13	42514759	42517156	chr13	42533432	42536522	3	2.07398e-11	No	Yes	uc001uyj.2;KIAA0564;chr13:42530221-42540221;uc001uyk.2;KIAA0564;chr13:42530221-42540221;
chr13:42524949-42537411	12462	chr13	42524949	42527602	chr13	42533886	42537411	3	1.03929e-11	No	Yes	uc001uyj.2;KIAA0564;chr13:42530221-42540221;uc001uyk.2;KIAA0564;chr13:42530221-42540221;
chr13:42553691-42615686	61995	chr13	42553691	42556395	chr13	42613241	42615686	3	9.89416e-11	No	Yes	uc010tfh.1;DGKH;chr13:42609171-42619171;
chr13:42583705-42616710	33005	chr13	42583705	42590605	chr13	42612030	42616710	9	1.75909e-28	No	Yes	uc010tfh.1;DGKH;chr13:42609171-42619171;
chr13:42593733-42614723	20990	chr13	42593733	42596846	chr13	42612371	42614723	3	1.81984e-11	No	Yes	uc010tfh.1;DGKH;chr13:42609171-42619171;
chr13:42598391-42617190	18799	chr13	42598391	42604381	chr13	42609121	42617190	16	0	No	Yes	uc010tfh.1;DGKH;chr13:42609171-42619171;
chr13:44370897-44455104	84207	chr13	44370897	44373811	chr13	44452214	44455104	3	3.57827e-10	No	Yes	uc010acf.2;CCDC122;chr13:44448826-44458826;uc010tfn.1;CCDC122;chr13:44444063-44454063;uc010acg.2;C13orf31;chr13:44448419-44458419;uc001uzf.3;C13orf31;chr13:44448968-44458968;
chr13:44378612-44455433	76821	chr13	44378612	44381300	chr13	44452318	44455433	5	1.85772e-14	No	Yes	uc010acf.2;CCDC122;chr13:44448826-44458826;uc010tfn.1;CCDC122;chr13:44444063-44454063;uc010acg.2;C13orf31;chr13:44448419-44458419;uc001uzf.3;C13orf31;chr13:44448968-44458968;
chr13:44440454-44452164	11710	chr13	44440454	44443564	chr13	44449337	44452164	4	6.97869e-16	No	Yes	uc010acf.2;CCDC122;chr13:44448826-44458826;uc010tfn.1;CCDC122;chr13:44444063-44454063;uc010acg.2;C13orf31;chr13:44448419-44458419;uc001uzf.3;C13orf31;chr13:44448968-44458968;
chr13:44440506-44455518	15012	chr13	44440506	44442880	chr13	44452645	44455518	3	1.20973e-10	No	Yes	uc010acf.2;CCDC122;chr13:44448826-44458826;uc010tfn.1;CCDC122;chr13:44444063-44454063;uc010acg.2;C13orf31;chr13:44448419-44458419;uc001uzf.3;C13orf31;chr13:44448968-44458968;
chr13:44478472-45012254	533782	chr13	44478472	44482093	chr13	45009429	45012254	3	4.51273e-10	No	Yes	uc001uzm.3;TSC22D1;chr13:45005979-45015979;
chr13:44622828-45012746	389918	chr13	44622828	44626275	chr13	45010031	45012746	7	5.34497e-24	No	Yes	uc001uzm.3;TSC22D1;chr13:45005979-45015979;
chr13:44698553-45012325	313772	chr13	44698553	44701682	chr13	45009610	45012325	3	9.21724e-11	No	Yes	uc001uzm.3;TSC22D1;chr13:45005979-45015979;
chr13:44706395-45012417	306022	chr13	44706395	44711269	chr13	45008839	45012417	4	1.5505e-12	No	Yes	uc001uzm.3;TSC22D1;chr13:45005979-45015979;
chr13:44714480-44735645	21165	chr13	44714480	44717131	chr13	44732137	44735645	3	2.27804e-11	No	Yes	uc001uzh.1;MGC5590;chr13:44730393-44740393;
chr13:44715821-44730520	14699	chr13	44715821	44717814	chr13	44727634	44730520	4	6.90281e-17	No	Yes	uc001uzh.1;MGC5590;chr13:44730393-44740393;
chr13:44716688-45008835	292147	chr13	44716688	44719639	chr13	45007063	45008835	3	1.13812e-11	No	Yes	uc001uzm.3;TSC22D1;chr13:45005979-45015979;
chr13:44717466-45012252	294786	chr13	44717466	44720262	chr13	45009714	45012252	3	2.84291e-10	No	Yes	uc001uzm.3;TSC22D1;chr13:45005979-45015979;
chr13:44753576-45011865	258289	chr13	44753576	44757765	chr13	45008462	45011865	5	5.48093e-16	No	Yes	uc001uzm.3;TSC22D1;chr13:45005979-45015979;
chr13:44760167-45013396	253229	chr13	44760167	44772381	chr13	45006652	45013396	21	0	No	Yes	uc001uzm.3;TSC22D1;chr13:45005979-45015979;
chr13:44774866-45012627	237761	chr13	44774866	44779020	chr13	45008963	45012627	4	9.76667e-14	No	Yes	uc001uzm.3;TSC22D1;chr13:45005979-45015979;
chr13:44807535-45012869	205334	chr13	44807535	44820413	chr13	45007509	45012869	35	0	No	Yes	uc001uzm.3;TSC22D1;chr13:45005979-45015979;
chr13:44845341-45011720	166379	chr13	44845341	44847690	chr13	45007505	45011720	3	4.85576e-10	No	Yes	uc001uzm.3;TSC22D1;chr13:45005979-45015979;
chr13:44847842-45011898	164056	chr13	44847842	44852172	chr13	45006782	45011898	6	2.87039e-19	No	Yes	uc001uzm.3;TSC22D1;chr13:45005979-45015979;
chr13:44873539-45011309	137770	chr13	44873539	44876603	chr13	45008384	45011309	3	8.96567e-10	No	Yes	uc001uzm.3;TSC22D1;chr13:45005979-45015979;
chr13:44897395-45012273	114878	chr13	44897395	44900422	chr13	45008582	45012273	4	1.13686e-12	No	Yes	uc001uzm.3;TSC22D1;chr13:45005979-45015979;
chr13:44909263-45010486	101223	chr13	44909263	44911668	chr13	45008028	45010486	3	6.58841e-11	No	Yes	uc001uzm.3;TSC22D1;chr13:45005979-45015979;
chr13:44928998-45007959	78961	chr13	44928998	44933339	chr13	45005625	45007959	3	2.66381e-11	No	Yes	uc001uzm.3;TSC22D1;chr13:45005979-45015979;
chr13:45103354-45151683	48329	chr13	45103354	45105549	chr13	45149431	45151683	3	4.5066e-11	No	Yes	uc001uzo.1;TSC22D1;chr13:45145392-45155392;uc001uzn.3;TSC22D1;chr13:45145701-45155701;
chr13:45115041-45153129	38088	chr13	45115041	45118685	chr13	45149946	45153129	4	1.11306e-13	No	Yes	uc001uzo.1;TSC22D1;chr13:45145392-45155392;uc001uzn.3;TSC22D1;chr13:45145701-45155701;
chr13:45126466-45148180	21714	chr13	45126466	45130654	chr13	45146280	45148180	4	2.35584e-16	No	Yes	uc001uzo.1;TSC22D1;chr13:45145392-45155392;uc001uzn.3;TSC22D1;chr13:45145701-45155701;
chr13:45545415-45564447	19032	chr13	45545415	45547604	chr13	45561461	45564447	3	1.69024e-11	No	Yes	uc001uzp.2;NUFIP1;chr13:45558613-45568613;uc010tfo.1;KIAA1704;chr13:45558686-45568686;uc001uzq.2;KIAA1704;chr13:45558686-45568686;uc001uzr.1;KIAA1704;chr13:45558686-45568686;uc001uzs.2;KIAA1704;chr13:45558686-45568686;
chr13:45889702-45916056	26354	chr13	45889702	45893419	chr13	45912859	45916056	4	1.82909e-13	No	Yes	uc001uzy.1;TPT1;chr13:45910297-45920297;uc001uzz.1;FLJ44635;chr13:45910297-45920297;uc001vaa.1;SNORA31;chr13:45906744-45916744;uc010tfp.1;TPT1;chr13:45910297-45920297;uc010tfq.1;DL491334;chr13:45909949-45919949;uc010tfr.1;pp13759;chr13:45910479-45920479;uc001vac.2;pp13759;chr13:45910647-45920647;
chr13:46606709-46622475	15766	chr13	46606709	46609332	chr13	46619554	46622475	3	7.72096e-14	No	Yes	uc010tfw.1;ZC3H13;chr13:46614648-46624648;uc001vas.1;ZC3H13;chr13:46621894-46631894;uc001vat.1;ZC3H13;chr13:46621881-46631881;uc001vau.1;AK124928;chr13:46621982-46631982;uc001vav.1;AK095119;chr13:46621982-46631982;
chr13:47109252-47130020	20768	chr13	47109252	47111634	chr13	47125330	47130020	4	2.91441e-14	No	Yes	uc010acp.2;LRCH1;chr13:47122295-47132295;uc001vbk.2;LRCH1;chr13:47122295-47132295;uc001vbj.2;LRCH1;chr13:47122295-47132295;uc001vbl.3;LRCH1;chr13:47122295-47132295;
chr13:48699791-48810071	110280	chr13	48699791	48701877	chr13	48806466	48810071	5	5.8704e-20	No	Yes	uc001vbz.3;ITM2B;chr13:48802273-48812273;
chr13:50100974-50160843	59869	chr13	50100974	50104825	chr13	50157801	50160843	3	5.64639e-12	No	Yes	uc001vde.1;RCBTB1;chr13:50154719-50164719;
chr13:50142756-50161593	18837	chr13	50142756	50146527	chr13	50158016	50161593	4	2.61848e-15	No	Yes	uc001vde.1;RCBTB1;chr13:50154719-50164719;
chr13:50474382-50512069	37687	chr13	50474382	50476998	chr13	50509261	50512069	3	7.02978e-13	No	Yes	uc001vdl.2;C13orf1;chr13:50505625-50515625;uc001vdm.2;C13orf1;chr13:50505625-50515625;uc010tgm.1;CLLD6;chr13:50505625-50515625;uc010adj.2;C13orf1;chr13:50505625-50515625;
chr13:52089246-52159506	70260	chr13	52089246	52092291	chr13	52156252	52159506	3	3.14607e-11	No	Yes	uc010ads.1;WDFY2;chr13:52153483-52163483;uc010adt.1;WDF2;chr13:52153483-52163483;uc001vfp.2;WDFY2;chr13:52153483-52163483;
chr13:52093115-52160245	67130	chr13	52093115	52097623	chr13	52157437	52160245	6	1.632e-20	No	Yes	uc010ads.1;WDFY2;chr13:52153483-52163483;uc010adt.1;WDF2;chr13:52153483-52163483;uc001vfp.2;WDFY2;chr13:52153483-52163483;
chr13:52114829-52160777	45948	chr13	52114829	52118630	chr13	52158674	52160777	3	1.40221e-11	No	Yes	uc010ads.1;WDFY2;chr13:52153483-52163483;uc010adt.1;WDF2;chr13:52153483-52163483;uc001vfp.2;WDFY2;chr13:52153483-52163483;
chr13:52131962-52158320	26358	chr13	52131962	52135088	chr13	52156352	52158320	3	6.67558e-13	No	Yes	uc010ads.1;WDFY2;chr13:52153483-52163483;uc010adt.1;WDF2;chr13:52153483-52163483;uc001vfp.2;WDFY2;chr13:52153483-52163483;
chr13:53173175-53228450	55275	chr13	53173175	53175683	chr13	53225993	53228450	3	2.86412e-10	No	Yes	uc001vha.2;SUGT1;chr13:53221830-53231830;uc001vhc.2;SUGT1;chr13:53221830-53231830;uc001vhb.2;SUGT1;chr13:53221830-53231830;uc010thb.1;SUGT1;chr13:53221830-53231830;uc001vhd.2;SUGT1;chr13:53221830-53231830;
chr13:60834165-60971533	137368	chr13	60834165	60836831	chr13	60969441	60971533	3	7.40367e-12	No	Yes	uc010aef.2;TDRD3;chr13:60965590-60975590;uc001via.2;TDRD3;chr13:60965590-60975590;uc001vhz.3;TDRD3;chr13:60965590-60975590;uc010aeg.2;TDRD3;chr13:60966426-60976426;
chr13:85491602-86369827	878225	chr13	85491602	85495231	chr13	86366745	86369827	3	1.7015e-15	No	Yes	uc001vll.1;SLITRK6;chr13:86368483-86378483;uc010afe.1;SLITRK6;chr13:86365053-86375053;
chr13:97591753-97599898	8145	chr13	97591753	97593843	chr13	97596968	97599898	3	2.36572e-16	No	Yes	uc010afq.1;BC029533;chr13:97595271-97605271;
chr13:97765314-97875540	110226	chr13	97765314	97767955	chr13	97872631	97875540	3	3.94783e-14	No	Yes	uc001vmz.2;MBNL2;chr13:97869573-97879573;uc001vna.2;MBNL2;chr13:97869573-97879573;uc001vnb.2;MBLL;chr13:97869573-97879573;uc010aft.2;MBNL2;chr13:97869573-97879573;
chr13:97770807-97876647	105840	chr13	97770807	97773775	chr13	97872906	97876647	5	2.25499e-21	No	Yes	uc001vmz.2;MBNL2;chr13:97869573-97879573;uc001vna.2;MBNL2;chr13:97869573-97879573;uc001vnb.2;MBLL;chr13:97869573-97879573;uc010aft.2;MBNL2;chr13:97869573-97879573;
chr13:97905079-97929496	24417	chr13	97905079	97913701	chr13	97925818	97929496	9	2.33113e-36	No	Yes	uc010tij.1;MBLL;chr13:97922885-97932885;
chr13:98506349-98630622	124273	chr13	98506349	98510215	chr13	98626986	98630622	3	1.58644e-12	No	Yes	uc001vnf.1;IPO5;chr13:98623885-98633885;uc010tik.1;IPO5;chr13:98623885-98633885;uc010til.1;IPO5;chr13:98624216-98634216;
chr13:99697613-99741048	43435	chr13	99697613	99700318	chr13	99737046	99741048	5	9.40151e-20	No	Yes	uc001vnt.2;DOCK9;chr13:99733660-99743660;uc010tir.1;DOCK9;chr13:99733660-99743660;uc010tit.1;DOCK9;chr13:99733660-99743660;
chr13:99792389-99854804	62415	chr13	99792389	99794750	chr13	99851236	99854804	3	1.06872e-12	No	Yes	uc001vnx.1;BC043515;chr13:99847964-99857964;uc001vny.1;CR605438;chr13:99848011-99858011;uc001voa.3;UBAC2;chr13:99847678-99857678;uc010tiu.1;UBAC2;chr13:99847678-99857678;uc001vob.3;UBAC2;chr13:99847678-99857678;uc010tiv.1;UBAC2;chr13:99847678-99857678;uc001vod.2;UBAC2;chr13:99848162-99858162;uc001voc.2;UBAC2;chr13:99848162-99858162;uc010tiw.1;UBAC2;chr13:99848162-99858162;
chr13:99804912-99854268	49356	chr13	99804912	99807411	chr13	99850784	99854268	3	5.73029e-12	No	Yes	uc001vnx.1;BC043515;chr13:99847964-99857964;uc001vny.1;CR605438;chr13:99848011-99858011;uc001voa.3;UBAC2;chr13:99847678-99857678;uc010tiu.1;UBAC2;chr13:99847678-99857678;uc001vob.3;UBAC2;chr13:99847678-99857678;uc010tiv.1;UBAC2;chr13:99847678-99857678;uc001vod.2;UBAC2;chr13:99848162-99858162;uc001voc.2;UBAC2;chr13:99848162-99858162;uc010tiw.1;UBAC2;chr13:99848162-99858162;
chr13:100595200-100621884	26684	chr13	100595200	100597637	chr13	100618206	100621884	3	2.11117e-14	No	Yes	uc001vom.1;ZIC5;chr13:100619178-100629178;
chr13:107173685-107188804	15119	chr13	107173685	107176545	chr13	107186744	107188804	3	2.9388e-11	No	Yes	uc001vqi.2;EFNB2;chr13:107182337-107192337;
chr13:111161352-111209869	48517	chr13	111161352	111163541	chr13	111207330	111209869	3	1.11854e-13	No	Yes	uc001vqy.2;RAB20;chr13:111209071-111219071;
chr13:111178113-111210358	32245	chr13	111178113	111180928	chr13	111206960	111210358	3	1.62644e-12	No	Yes	uc001vqy.2;RAB20;chr13:111209071-111219071;
chr13:111201421-111214450	13029	chr13	111201421	111204692	chr13	111211938	111214450	3	1.8579e-12	No	Yes	uc001vqy.2;RAB20;chr13:111209071-111219071;
chr13:111332786-111359801	27015	chr13	111332786	111335109	chr13	111356617	111359801	4	5.01352e-16	No	Yes	uc001vrd.2;CARS2;chr13:111353480-111363480;
chr13:113547500-113562069	14569	chr13	113547500	113549764	chr13	113558264	113562069	4	8.4957e-17	No	Yes	uc001vso.2;BC035340;chr13:113551508-113561508;
chr13:113594529-113659102	64573	chr13	113594529	113602852	chr13	113650519	113659102	19	0	No	Yes	uc001vss.3;MCF2L;chr13:113651067-113661067;uc010tjs.1;MCF2L;chr13:113651067-113661067;
chr13:113596381-113623655	27274	chr13	113596381	113599408	chr13	113618090	113623655	6	1.5327e-21	No	Yes	uc001vsp.1;BC080517;chr13:113617952-113627952;uc001vsu.2;MCF2L;chr13:113617756-113627756;uc001vsq.2;MCF2L;chr13:113617756-113627756;uc010tjr.1;MCF2L;chr13:113618534-113628534;
chr13:113750920-113760511	9591	chr13	113750920	113753790	chr13	113757434	113760511	3	5.42338e-14	No	Yes	uc010agp.1;F7;chr13:113755104-113765104;uc001vsv.2;F7;chr13:113755104-113765104;uc001vsw.2;F7;chr13:113755104-113765104;uc010tjt.1;F7;chr13:113755104-113765104;
chr13:114063798-114105680	41882	chr13	114063798	114067409	chr13	114102095	114105680	5	2.21747e-19	No	Yes	uc001vtp.1;ADPRHL1;chr13:114098457-114108457;uc001vtq.1;ADPRHL1;chr13:114102839-114112839;
chr13:114092102-114100966	8864	chr13	114092102	114095575	chr13	114097756	114100966	4	5.65156e-20	No	Yes	uc001vtp.1;ADPRHL1;chr13:114098457-114108457;
chr13:114783576-114799095	15519	chr13	114783576	114787503	chr13	114796260	114799095	3	2.55745e-12	No	Yes	uc010aha.1;RASA3;chr13:114796669-114806669;
chr13:114828087-114845936	17849	chr13	114828087	114831896	chr13	114842479	114845936	6	5.79853e-21	No	Yes	uc010tkk.1;RASA3;chr13:114838438-114848438;
chr13:114834001-114844959	10958	chr13	114834001	114836253	chr13	114840554	114844959	4	1.18621e-16	No	Yes	uc010tkk.1;RASA3;chr13:114838438-114848438;
chr14:20867822-20883771	15949	chr14	20867822	20871188	chr14	20880173	20883771	5	5.19702e-17	No	Yes	uc001vxe.2;TEP1;chr14:20876579-20886579;uc010tlf.1;TEP1;chr14:20876579-20886579;uc010tlg.1;TEP1;chr14:20876579-20886579;
chr14:20867843-20931545	63702	chr14	20867843	20871412	chr14	20927929	20931545	6	1.22706e-18	No	Yes	uc001vxf.2;OSGEP;chr14:20918198-20928198;uc001vxg.2;APEX1;chr14:20918289-20928289;uc001vxh.2;APEX1;chr14:20918289-20928289;uc001vxi.2;APEX1;chr14:20918289-20928289;uc001vxj.2;APEX1;chr14:20918420-20928420;uc001vxk.2;TMEM55B;chr14:20924637-20934637;uc001vxl.2;TMEM55B;chr14:20924637-20934637;
chr14:20867852-20879846	11994	chr14	20867852	20870759	chr14	20877710	20879846	3	1.1072e-12	No	Yes	uc001vxe.2;TEP1;chr14:20876579-20886579;uc010tlf.1;TEP1;chr14:20876579-20886579;uc010tlg.1;TEP1;chr14:20876579-20886579;
chr14:20868641-20925258	56617	chr14	20868641	20871296	chr14	20922673	20925258	3	4.80243e-09	No	Yes	uc001vxf.2;OSGEP;chr14:20918198-20928198;uc001vxg.2;APEX1;chr14:20918289-20928289;uc001vxh.2;APEX1;chr14:20918289-20928289;uc001vxi.2;APEX1;chr14:20918289-20928289;uc001vxj.2;APEX1;chr14:20918420-20928420;uc001vxk.2;TMEM55B;chr14:20924637-20934637;uc001vxl.2;TMEM55B;chr14:20924637-20934637;
chr14:20871198-20883117	11919	chr14	20871198	20873561	chr14	20879945	20883117	3	9.60905e-11	No	Yes	uc001vxe.2;TEP1;chr14:20876579-20886579;uc010tlf.1;TEP1;chr14:20876579-20886579;uc010tlg.1;TEP1;chr14:20876579-20886579;
chr14:21081790-21158475	76685	chr14	21081790	21083741	chr14	21155257	21158475	3	1.14593e-12	No	Yes	uc001vxw.3;ANG;chr14:21147335-21157335;uc001vxz.2;ANG;chr14:21151931-21161931;uc001vxy.3;RNASE4;chr14:21147335-21157335;uc001vxx.3;RNASE4;chr14:21147335-21157335;uc001vya.2;RNASE4;chr14:21151931-21161931;
chr14:21093251-21154024	60773	chr14	21093251	21098332	chr14	21147860	21154024	6	3.33696e-19	No	Yes	uc001vxw.3;ANG;chr14:21147335-21157335;uc001vxz.2;ANG;chr14:21151931-21161931;uc001vxy.3;RNASE4;chr14:21147335-21157335;uc001vxx.3;RNASE4;chr14:21147335-21157335;uc001vya.2;RNASE4;chr14:21151931-21161931;
chr14:21124051-21151659	27608	chr14	21124051	21127045	chr14	21149857	21151659	3	1.75741e-10	No	Yes	uc001vxw.3;ANG;chr14:21147335-21157335;uc001vxy.3;RNASE4;chr14:21147335-21157335;uc001vxx.3;RNASE4;chr14:21147335-21157335;
chr14:21137254-21152759	15505	chr14	21137254	21141784	chr14	21148334	21152759	7	9.43459e-24	No	Yes	uc001vxw.3;ANG;chr14:21147335-21157335;uc001vxz.2;ANG;chr14:21151931-21161931;uc001vxy.3;RNASE4;chr14:21147335-21157335;uc001vxx.3;RNASE4;chr14:21147335-21157335;uc001vya.2;RNASE4;chr14:21151931-21161931;
chr14:21682920-21695651	12731	chr14	21682920	21686919	chr14	21693629	21695651	3	1.99197e-13	No	Yes	uc010tlr.1;HNRNPC;chr14:21693532-21703532;
chr14:21684971-21738674	53703	chr14	21684971	21687405	chr14	21736664	21738674	3	9.16723e-11	No	Yes	uc001vzw.2;HNRNPC;chr14:21732638-21742638;uc001wad.2;HNRNPCL1;chr14:21732638-21742638;uc001vzx.2;HNRPC;chr14:21732638-21742638;uc001vzy.2;HNRNPC;chr14:21732638-21742638;uc001vzz.2;HNRNPC;chr14:21732638-21742638;uc001waa.2;HNRNPC;chr14:21732638-21742638;uc010ail.2;HNRNPC;chr14:21732638-21742638;uc010tlq.1;HNRPC;chr14:21732638-21742638;uc001wab.2;HNRNPC;chr14:21732638-21742638;uc001wac.2;HNRPCL1;ch…
chr14:21774765-21854259	79494	chr14	21774765	21778578	chr14	21848688	21854259	7	1.86177e-21	No	Yes	uc001wao.2;SUPT16H;chr14:21847425-21857425;uc001wap.2;SUPT16H;chr14:21847425-21857425;uc001waq.1;SUPT16H;chr14:21847425-21857425;
chr14:23136208-23237580	101372	chr14	23136208	23139519	chr14	23235954	23237580	3	1.33021e-12	No	Yes	uc010tnc.1;OXA1L;chr14:23230730-23240730;uc001wgn.2;OXA1L;chr14:23230730-23240730;uc001wgo.2;OXA1L;chr14:23230730-23240730;uc010akc.2;OXA1L;chr14:23230730-23240730;uc001wgp.2;OXA1L;chr14:23230960-23240960;uc001wgq.2;OXA1L;chr14:23231456-23241456;
chr14:23659026-23757167	98141	chr14	23659026	23661014	chr14	23754347	23757167	3	2.07754e-11	No	Yes	uc001wja.2;HOMEZ;chr14:23750309-23760309;
chr14:24005899-24028988	23089	chr14	24005899	24012245	chr14	24023874	24028988	7	7.54845e-22	No	Yes	uc001wkf.1;ZNF409;chr14:24015858-24025858;uc001wkh.3;THTPA;chr14:24020197-24030197;uc001wkg.3;THTPA;chr14:24020197-24030197;uc010akr.2;THTPA;chr14:24020197-24030197;uc001wki.3;THTPA;chr14:24020502-24030502;uc001wkp.1;G2AD;chr14:24028869-24038869;uc001wko.1;AX747770;chr14:24025305-24035305;
chr14:24082936-24102106	19170	chr14	24082936	24085294	chr14	24098210	24102106	3	3.38348e-13	No	Yes	uc010aku.1;DHRS2;chr14:24094323-24104323;uc001wku.3;DHRS2;chr14:24100572-24110572;uc001wkt.3;DHRS2;chr14:24100572-24110572;uc010akv.2;DHRS2;chr14:24100572-24110572;uc001wkv.3;DHRS2;chr14:24100572-24110572;
chr14:24197895-24424681	226786	chr14	24197895	24200996	chr14	24421897	24424681	3	1.3406e-11	No	Yes	uc001wkz.2;C14orf167;chr14:24418392-24428392;uc001wky.2;C14orf167;chr14:24418392-24428392;uc001wkx.2;C14orf167;chr14:24418392-24428392;uc010akx.1;C14orf167;chr14:24419298-24429298;uc010aky.2;DHRS4L2;chr14:24417964-24427964;uc001wla.2;DHRS4;chr14:24417964-24427964;uc001wlb.2;DHRS4;chr14:24417964-24427964;uc010akz.2;DHRS4L2;chr14:24417964-24427964;uc001wlc.3;DHRS4;chr14:24417964-24427964;uc001wld.3…
chr14:24409327-24424695	15368	chr14	24409327	24412764	chr14	24421843	24424695	3	4.70169e-11	No	Yes	uc001wkz.2;C14orf167;chr14:24418392-24428392;uc001wky.2;C14orf167;chr14:24418392-24428392;uc001wkx.2;C14orf167;chr14:24418392-24428392;uc010akx.1;C14orf167;chr14:24419298-24429298;uc010aky.2;DHRS4L2;chr14:24417964-24427964;uc001wla.2;DHRS4;chr14:24417964-24427964;uc001wlb.2;DHRS4;chr14:24417964-24427964;uc010akz.2;DHRS4L2;chr14:24417964-24427964;uc001wlc.3;DHRS4;chr14:24417964-24427964;uc001wld.3…
chr14:24854983-24900485	45502	chr14	24854983	24857784	chr14	24896840	24900485	3	7.24002e-10	No	Yes	uc001wpg.3;CBLN3;chr14:24893731-24903731;uc010tpc.1;KIAA0323;chr14:24893491-24903491;uc001wph.3;KIAA0323;chr14:24894140-24904140;uc010alw.2;KIAA0323;chr14:24894159-24904159;
chr14:31060440-31092777	32337	chr14	31060440	31063351	chr14	31089762	31092777	3	3.18692e-11	No	Yes	uc010amd.1;KIAA0917;chr14:31086520-31096520;uc010ame.1;SCFD1;chr14:31086520-31096520;uc001wqm.1;SCFD1;chr14:31086520-31096520;uc001wqn.1;SCFD1;chr14:31086520-31096520;uc010tpg.1;SCFD1;chr14:31086520-31096520;uc010tph.1;KIAA0917;chr14:31086520-31096520;uc010amf.1;KIAA0917;chr14:31086520-31096520;uc010tpi.1;SCFD1;chr14:31086537-31096537;
chr14:31645444-31677762	32318	chr14	31645444	31648417	chr14	31675199	31677762	3	1.32451e-10	No	Yes	uc001wrc.1;HECTD1;chr14:31671689-31681689;uc001wre.2;HECTD1;chr14:31671915-31681915;
chr14:34799049-34932817	133768	chr14	34799049	34803588	chr14	34929796	34932817	6	1.82051e-18	No	Yes	uc001wsc.2;C14orf147;chr14:34926468-34936468;
chr14:34821157-34932479	111322	chr14	34821157	34825129	chr14	34928813	34932479	5	4.68927e-17	No	Yes	uc001wsc.2;C14orf147;chr14:34926468-34936468;
chr14:34831090-34932517	101427	chr14	34831090	34836007	chr14	34929679	34932517	6	9.42287e-19	No	Yes	uc001wsc.2;C14orf147;chr14:34926468-34936468;
chr14:34836399-34933225	96826	chr14	34836399	34839473	chr14	34930536	34933225	4	1.65374e-12	No	Yes	uc001wsc.2;C14orf147;chr14:34926468-34936468;
chr14:34902502-34932509	30007	chr14	34902502	34904876	chr14	34929052	34932509	4	3.65727e-14	No	Yes	uc001wsc.2;C14orf147;chr14:34926468-34936468;
chr14:35016252-35179365	163113	chr14	35016252	35019435	chr14	35175626	35179365	3	2.13542e-08	No	Yes	uc001wsg.3;CFL2;chr14:35178023-35188023;uc010tpn.1;CFL2;chr14:35178761-35188761;uc001wsh.3;CFL2;chr14:35179029-35189029;uc001wsi.3;CFL2;chr14:35179029-35189029;uc001wsj.3;CFL2;chr14:35179029-35189029;
chr14:35443310-35453981	10671	chr14	35443310	35446358	chr14	35450182	35453981	5	7.65832e-19	No	Yes	uc001wso.2;SRP54;chr14:35447103-35457103;uc010tpp.1;SRP54;chr14:35447103-35457103;uc010tpq.1;SRP54;chr14:35447103-35457103;
chr14:35670106-35873972	203866	chr14	35670106	35671869	chr14	35871133	35873972	3	6.67059e-10	No	Yes	uc001wte.3;NFKBIA;chr14:35868346-35878346;uc001wtf.3;NFKBIA;chr14:35868960-35878960;uc001wtg.3;NFKBIA;chr14:35868960-35878960;uc010amo.2;NFKBIA;chr14:35868960-35878960;
chr14:35680958-35876074	195116	chr14	35680958	35685764	chr14	35872472	35876074	7	1.45669e-18	No	Yes	uc001wte.3;NFKBIA;chr14:35868346-35878346;uc001wtf.3;NFKBIA;chr14:35868960-35878960;uc001wtg.3;NFKBIA;chr14:35868960-35878960;uc010amo.2;NFKBIA;chr14:35868960-35878960;
chr14:35683180-35869368	186188	chr14	35683180	35685889	chr14	35867098	35869368	3	4.09608e-09	No	Yes	uc001wte.3;NFKBIA;chr14:35868346-35878346;uc001wtf.3;NFKBIA;chr14:35868960-35878960;uc001wtg.3;NFKBIA;chr14:35868960-35878960;uc010amo.2;NFKBIA;chr14:35868960-35878960;
chr14:35689551-35762726	73175	chr14	35689551	35692151	chr14	35760450	35762726	3	1.60876e-10	No	Yes	uc001wtd.2;PSMA6;chr14:35756573-35766573;uc010tpt.1;PSMA6;chr14:35756573-35766573;uc010tpu.1;PSMA6;chr14:35756656-35766656;
chr14:35689608-35869361	179753	chr14	35689608	35693753	chr14	35865249	35869361	6	1.26107e-17	No	Yes	uc001wte.3;NFKBIA;chr14:35868346-35878346;uc001wtf.3;NFKBIA;chr14:35868960-35878960;uc001wtg.3;NFKBIA;chr14:35868960-35878960;uc010amo.2;NFKBIA;chr14:35868960-35878960;
chr14:35695193-35879159	183966	chr14	35695193	35706000	chr14	35866255	35879159	42	0	No	Yes	uc001wte.3;NFKBIA;chr14:35868346-35878346;uc001wtf.3;NFKBIA;chr14:35868960-35878960;uc001wtg.3;NFKBIA;chr14:35868960-35878960;uc010amo.2;NFKBIA;chr14:35868960-35878960;
chr14:35701633-35763215	61582	chr14	35701633	35705447	chr14	35760005	35763215	4	3.98596e-13	No	Yes	uc001wtd.2;PSMA6;chr14:35756573-35766573;uc010tpt.1;PSMA6;chr14:35756573-35766573;uc010tpu.1;PSMA6;chr14:35756656-35766656;
chr14:35723024-35876145	153121	chr14	35723024	35726241	chr14	35873288	35876145	3	2.81098e-09	No	Yes	uc001wte.3;NFKBIA;chr14:35868346-35878346;uc001wtf.3;NFKBIA;chr14:35868960-35878960;uc001wtg.3;NFKBIA;chr14:35868960-35878960;uc010amo.2;NFKBIA;chr14:35868960-35878960;
chr14:35726193-35870557	144364	chr14	35726193	35729165	chr14	35868329	35870557	3	1.27552e-09	No	Yes	uc001wte.3;NFKBIA;chr14:35868346-35878346;uc001wtf.3;NFKBIA;chr14:35868960-35878960;uc001wtg.3;NFKBIA;chr14:35868960-35878960;uc010amo.2;NFKBIA;chr14:35868960-35878960;
chr14:35736632-35875942	139310	chr14	35736632	35741307	chr14	35872574	35875942	5	2.41344e-14	No	Yes	uc001wte.3;NFKBIA;chr14:35868346-35878346;uc001wtf.3;NFKBIA;chr14:35868960-35878960;uc001wtg.3;NFKBIA;chr14:35868960-35878960;uc010amo.2;NFKBIA;chr14:35868960-35878960;
chr14:35742696-35874138	131442	chr14	35742696	35750735	chr14	35870363	35874138	7	8.30934e-18	No	Yes	uc001wte.3;NFKBIA;chr14:35868346-35878346;uc001wtf.3;NFKBIA;chr14:35868960-35878960;uc001wtg.3;NFKBIA;chr14:35868960-35878960;uc010amo.2;NFKBIA;chr14:35868960-35878960;
chr14:37698096-38066013	367917	chr14	37698096	37705480	chr14	38061309	38066013	13	2.7299e-33	No	Yes	uc010tpz.1;FOXA1;chr14:38058467-38068467;uc001wuf.2;FOXA1;chr14:38059489-38069489;
chr14:37709149-38067789	358640	chr14	37709149	37730989	chr14	38048141	38067789	135	0	No	Yes	uc010tpz.1;FOXA1;chr14:38058467-38068467;uc001wuf.2;FOXA1;chr14:38059489-38069489;
chr14:37732063-38059808	327745	chr14	37732063	37736405	chr14	38055420	38059808	4	7.33929e-12	No	Yes	uc010tpz.1;FOXA1;chr14:38058467-38068467;uc001wuf.2;FOXA1;chr14:38059489-38069489;
chr14:37904725-38065274	160549	chr14	37904725	37909149	chr14	38061107	38065274	9	1.08066e-23	No	Yes	uc010tpz.1;FOXA1;chr14:38058467-38068467;uc001wuf.2;FOXA1;chr14:38059489-38069489;
chr14:37996356-38059493	63137	chr14	37996356	38000397	chr14	38056446	38059493	3	2.82215e-09	No	Yes	uc010tpz.1;FOXA1;chr14:38058467-38068467;uc001wuf.2;FOXA1;chr14:38059489-38069489;
chr14:37997035-38066021	68986	chr14	37997035	38000891	chr14	38059791	38066021	6	8.27089e-16	No	Yes	uc010tpz.1;FOXA1;chr14:38058467-38068467;uc001wuf.2;FOXA1;chr14:38059489-38069489;
chr14:38010426-38062032	51606	chr14	38010426	38020494	chr14	38050537	38062032	33	0	No	Yes	uc010tpz.1;FOXA1;chr14:38058467-38068467;uc001wuf.2;FOXA1;chr14:38059489-38069489;
chr14:38011441-38065926	54485	chr14	38011441	38015766	chr14	38062652	38065926	9	3.77496e-23	No	Yes	uc010tpz.1;FOXA1;chr14:38058467-38068467;uc001wuf.2;FOXA1;chr14:38059489-38069489;
chr14:39618656-39644115	25459	chr14	39618656	39622736	chr14	39641683	39644115	3	8.60407e-12	No	Yes	uc001wut.1;TRAPPC6B;chr14:39634634-39644634;uc001wuu.1;TRAPPC6B;chr14:39634634-39644634;uc001wuv.1;DKFZp667C045;chr14:39634634-39644634;uc010tqd.1;DKFZp667C045;chr14:39634634-39644634;uc001wuw.3;PNN;chr14:39639386-39649386;
chr14:39651767-39701629	49862	chr14	39651767	39657982	chr14	39696424	39701629	5	7.17423e-17	No	Yes	uc010amy.1;MIA2;chr14:39698124-39708124;uc001wux.2;MIA2;chr14:39698124-39708124;
chr14:39669831-39737193	67362	chr14	39669831	39673091	chr14	39734420	39737193	3	5.39315e-10	No	Yes	uc001wvd.2;BC015671;chr14:39731265-39741265;uc001wve.1;CTAGE5;chr14:39730877-39740877;uc010tqe.1;CTAGE5;chr14:39729475-39739475;uc001wuz.3;CTAGE5;chr14:39729475-39739475;uc001wuy.3;CTAGE5;chr14:39729475-39739475;uc001wvb.3;CTAGE5;chr14:39730501-39740501;uc001wvc.3;CTAGE5;chr14:39730501-39740501;uc001wva.3;CTAGE5;chr14:39730501-39740501;uc001wvg.3;CTAGE5;chr14:39731327-39741327;uc001wvh.3;CTAGE5;c…
chr14:39711895-39737038	25143	chr14	39711895	39714858	chr14	39734038	39737038	4	9.13494e-15	No	Yes	uc001wvd.2;BC015671;chr14:39731265-39741265;uc001wve.1;CTAGE5;chr14:39730877-39740877;uc010tqe.1;CTAGE5;chr14:39729475-39739475;uc001wuz.3;CTAGE5;chr14:39729475-39739475;uc001wuy.3;CTAGE5;chr14:39729475-39739475;uc001wvb.3;CTAGE5;chr14:39730501-39740501;uc001wvc.3;CTAGE5;chr14:39730501-39740501;uc001wva.3;CTAGE5;chr14:39730501-39740501;uc001wvg.3;CTAGE5;chr14:39731327-39741327;uc001wvh.3;CTAGE5;c…
chr14:39887184-39902826	15642	chr14	39887184	39890386	chr14	39899843	39902826	3	2.50756e-11	No	Yes	uc001wvk.2;FBXO33;chr14:39896704-39906704;
chr14:45399111-45724209	325098	chr14	45399111	45401626	chr14	45721272	45724209	3	3.80446e-11	No	Yes	uc001wwf.2;C14orf106;chr14:45717605-45727605;uc010anh.2;KIAA1903;chr14:45717605-45727605;
chr14:45685240-45723076	37836	chr14	45685240	45687298	chr14	45720585	45723076	3	8.60031e-12	No	Yes	uc001wwf.2;C14orf106;chr14:45717605-45727605;uc010anh.2;KIAA1903;chr14:45717605-45727605;
chr14:50328596-50432205	103609	chr14	50328596	50331589	chr14	50428574	50432205	3	4.32881e-10	No	Yes	uc001wxh.1;AK092589;chr14:50423678-50433678;
chr14:50330959-50507880	176921	chr14	50330959	50334673	chr14	50505434	50507880	3	1.95449e-10	No	Yes	uc001wxl.2;BC084561;chr14:50502947-50512947;
chr14:50375839-50467741	91902	chr14	50375839	50379625	chr14	50465094	50467741	4	2.2165e-14	No	Yes	uc010tqj.1;BC068095;chr14:50464007-50474007;
chr14:50412662-50470386	57724	chr14	50412662	50419266	chr14	50465173	50470386	14	2.06411e-42	No	Yes	uc010tqj.1;BC068095;chr14:50464007-50474007;uc001wxi.1;C14orf182;chr14:50469238-50479238;
chr14:50419326-50470167	50841	chr14	50419326	50422578	chr14	50466019	50470167	6	5.29254e-19	No	Yes	uc010tqj.1;BC068095;chr14:50464007-50474007;uc001wxi.1;C14orf182;chr14:50469238-50479238;
chr14:50484732-50507699	22967	chr14	50484732	50487910	chr14	50504665	50507699	4	2.12144e-14	No	Yes	uc001wxl.2;BC084561;chr14:50502947-50512947;
chr14:50743579-50779252	35673	chr14	50743579	50746501	chr14	50777477	50779252	3	1.01887e-11	No	Yes	uc010tqn.1;L2HGDH;chr14:50773947-50783947;uc001wxu.2;L2HGDH;chr14:50773947-50783947;uc010tqo.1;L2HGDH;chr14:50773947-50783947;uc001wxv.2;ATP5S;chr14:50774046-50784046;uc001wxw.1;ATP5S;chr14:50774046-50784046;uc001wxx.1;ATP5S;chr14:50774046-50784046;
chr14:50799371-51001076	201705	chr14	50799371	50802387	chr14	50997880	51001076	3	6.49868e-11	No	Yes	uc010anv.1;MAP4K5;chr14:50993893-51003893;uc001wya.2;MAP4K5;chr14:50994376-51004376;uc001wyb.2;MAP4K5;chr14:50994376-51004376;uc001wyd.3;ATL1;chr14:50994799-51004799;
chr14:51770013-52119859	349846	chr14	51770013	51772648	chr14	52117927	52119859	3	1.79453e-10	No	Yes	uc001wzc.2;FRMD6;chr14:52113575-52123575;uc001wzd.2;FRMD6;chr14:52113575-52123575;
chr14:51865179-52119882	254703	chr14	51865179	51867243	chr14	52116233	52119882	3	1.67984e-10	No	Yes	uc001wzc.2;FRMD6;chr14:52113575-52123575;uc001wzd.2;FRMD6;chr14:52113575-52123575;
chr14:51992317-52120168	127851	chr14	51992317	51995784	chr14	52117019	52120168	4	3.20344e-13	No	Yes	uc001wzc.2;FRMD6;chr14:52113575-52123575;uc001wzd.2;FRMD6;chr14:52113575-52123575;
chr14:52000407-52120751	120344	chr14	52000407	52004605	chr14	52116491	52120751	7	2.01686e-20	No	Yes	uc001wzc.2;FRMD6;chr14:52113575-52123575;uc001wzd.2;FRMD6;chr14:52113575-52123575;
chr14:52005063-52120200	115137	chr14	52005063	52009520	chr14	52117772	52120200	4	3.59452e-12	No	Yes	uc001wzc.2;FRMD6;chr14:52113575-52123575;uc001wzd.2;FRMD6;chr14:52113575-52123575;
chr14:52016383-52121203	104820	chr14	52016383	52024490	chr14	52115587	52121203	24	0	No	Yes	uc001wzc.2;FRMD6;chr14:52113575-52123575;uc001wzd.2;FRMD6;chr14:52113575-52123575;
chr14:52026840-52121365	94525	chr14	52026840	52036612	chr14	52109034	52121365	25	0	No	Yes	uc001wzc.2;FRMD6;chr14:52113575-52123575;uc001wzd.2;FRMD6;chr14:52113575-52123575;
chr14:52048416-52118449	70033	chr14	52048416	52053288	chr14	52114070	52118449	4	1.25184e-13	No	Yes	uc001wzc.2;FRMD6;chr14:52113575-52123575;uc001wzd.2;FRMD6;chr14:52113575-52123575;
chr14:52937841-53021066	83225	chr14	52937841	52941622	chr14	53018224	53021066	4	7.88877e-15	No	Yes	uc010tqu.1;TXNDC16;chr14:53014301-53024301;uc001wzs.2;TXNDC16;chr14:53014301-53024301;uc010aoe.2;TXNDC16;chr14:53014301-53024301;uc001wzu.3;GPR137C;chr14:53014865-53024865;uc001wzt.3;GPR137C;chr14:53014865-53024865;
chr14:52956045-53021211	65166	chr14	52956045	52958667	chr14	53018944	53021211	3	4.63444e-12	No	Yes	uc010tqu.1;TXNDC16;chr14:53014301-53024301;uc001wzs.2;TXNDC16;chr14:53014301-53024301;uc010aoe.2;TXNDC16;chr14:53014301-53024301;uc001wzu.3;GPR137C;chr14:53014865-53024865;uc001wzt.3;GPR137C;chr14:53014865-53024865;
chr14:53287615-53419313	131698	chr14	53287615	53291339	chr14	53416404	53419313	3	6.59423e-11	No	Yes	uc001xad.2;FERMT2;chr14:53412591-53422591;uc001xac.2;FERMT2;chr14:53412815-53422815;uc001xae.2;FERMT2;chr14:53412815-53422815;uc001xaf.2;FERMT2;chr14:53412815-53422815;
chr14:53348641-53418682	70041	chr14	53348641	53351522	chr14	53416464	53418682	3	3.23195e-11	No	Yes	uc001xad.2;FERMT2;chr14:53412591-53422591;uc001xac.2;FERMT2;chr14:53412815-53422815;uc001xae.2;FERMT2;chr14:53412815-53422815;uc001xaf.2;FERMT2;chr14:53412815-53422815;
chr14:53386420-53419644	33224	chr14	53386420	53393235	chr14	53414993	53419644	8	4.41627e-26	No	Yes	uc001xad.2;FERMT2;chr14:53412591-53422591;uc001xac.2;FERMT2;chr14:53412815-53422815;uc001xae.2;FERMT2;chr14:53412815-53422815;uc001xaf.2;FERMT2;chr14:53412815-53422815;
chr14:53398328-53419374	21046	chr14	53398328	53405458	chr14	53415114	53419374	7	1.18567e-22	No	Yes	uc001xad.2;FERMT2;chr14:53412591-53422591;uc001xac.2;FERMT2;chr14:53412815-53422815;uc001xae.2;FERMT2;chr14:53412815-53422815;uc001xaf.2;FERMT2;chr14:53412815-53422815;
chr14:54393451-54421833	28382	chr14	54393451	54398026	chr14	54418901	54421833	4	1.35206e-13	No	Yes	uc001xal.3;BMP4;chr14:54415173-54425173;uc010aoh.2;BMP4;chr14:54416270-54426270;uc001xao.3;BMP4;chr14:54418554-54428554;uc001xan.3;BMP4;chr14:54418554-54428554;
chr14:54404039-54415623	11584	chr14	54404039	54412581	chr14	54408292	54415623	20	0	No	Yes	uc001xal.3;BMP4;chr14:54415173-54425173;
chr14:54933799-54956255	22456	chr14	54933799	54939109	chr14	54953144	54956255	5	2.00295e-17	No	Yes	uc001xaw.1;GMFB;chr14:54945485-54955485;uc010tqz.1;GMFB;chr14:54950744-54960744;
chr14:54935526-54945707	10181	chr14	54935526	54940437	chr14	54939619	54945707	6	6.92281e-25	No	Yes	uc001xaw.1;GMFB;chr14:54945485-54955485;
chr14:55272162-55370664	98502	chr14	55272162	55274540	chr14	55368133	55370664	4	3.3855e-13	No	Yes	uc001xbh.1;GCH1;chr14:55364542-55374542;uc001xbi.1;GCH1;chr14:55364542-55374542;uc001xbj.1;GCH1;chr14:55364542-55374542;uc001xbk.1;GCH1;chr14:55364542-55374542;uc010aol.1;GCH1;chr14:55364542-55374542;uc001xbl.1;GCH1;chr14:55364542-55374542;
chr14:55351951-55370512	18561	chr14	55351951	55354870	chr14	55368126	55370512	5	8.59501e-17	No	Yes	uc001xbh.1;GCH1;chr14:55364542-55374542;uc001xbi.1;GCH1;chr14:55364542-55374542;uc001xbj.1;GCH1;chr14:55364542-55374542;uc001xbk.1;GCH1;chr14:55364542-55374542;uc010aol.1;GCH1;chr14:55364542-55374542;uc001xbl.1;GCH1;chr14:55364542-55374542;
chr14:55536769-55598545	61776	chr14	55536769	55540247	chr14	55595569	55598545	3	1.74318e-09	No	Yes	uc001xbr.2;LGALS3;chr14:55590871-55600871;
chr14:57688674-57704504	15830	chr14	57688674	57692403	chr14	57700899	57704504	3	1.09096e-13	No	Yes	uc001xcs.2;EXOC5;chr14:57694090-57704090;
chr14:57758859-57858280	99421	chr14	57758859	57761176	chr14	57856360	57858280	3	6.87553e-12	No	Yes	uc001xcx.3;NAT12;chr14:57852270-57862270;uc010trk.1;NAT12;chr14:57852270-57862270;uc010aow.2;NAT12;chr14:57852270-57862270;
chr14:58784864-58794233	9369	chr14	58784864	58787190	chr14	58791896	58794233	3	1.31016e-15	No	Yes	uc010apg.1;ARID4A;chr14:58793098-58803098;
chr14:58868512-58894622	26110	chr14	58868512	58871753	chr14	58891599	58894622	4	1.52367e-15	No	Yes	uc010aph.2;TIMM9;chr14:58888960-58898960;uc001xds.2;TIMM9;chr14:58889232-58899232;uc010api.2;TIMM9;chr14:58889232-58899232;uc010trr.1;KIAA0586;chr14:58889119-58899119;uc001xdt.3;KIAA0586;chr14:58889119-58899119;uc001xdu.3;KIAA0586;chr14:58889119-58899119;uc010trs.1;KIAA0586;chr14:58889119-58899119;uc001xdv.3;KIAA0586;chr14:58889709-58899709;
chr14:59600467-59656731	56264	chr14	59600467	59604389	chr14	59654711	59656731	3	3.06446e-10	No	Yes	uc001xdy.2;DAAM1;chr14:59650398-59660398;uc001xeb.1;DAAM1;chr14:59650449-59660449;uc001xdz.1;DAAM1;chr14:59650398-59660398;uc001xea.1;DAAM1;chr14:59650398-59660398;
chr14:60662200-60717497	55297	chr14	60662200	60665638	chr14	60714414	60717497	3	4.60864e-10	No	Yes	uc001xev.1;BC035195;chr14:60707368-60717368;uc001xex.3;PPM1A;chr14:60710965-60720965;uc001xew.3;PPM1A;chr14:60707469-60717469;uc010apn.2;PPM1A;chr14:60707469-60717469;uc001xey.3;PPM1A;chr14:60710965-60720965;
chr14:61096036-61117791	21755	chr14	61096036	61099092	chr14	61114165	61117791	4	2.98035e-16	No	Yes	uc001xfb.3;SIX1;chr14:61111155-61121155;
chr14:61106855-61117742	10887	chr14	61106855	61109565	chr14	61114323	61117742	3	5.77815e-12	No	Yes	uc001xfb.3;SIX1;chr14:61111155-61121155;
chr14:61124170-61190823	66653	chr14	61124170	61126450	chr14	61188668	61190823	3	5.56551e-10	No	Yes	uc001xfc.2;SIX4;chr14:61185792-61195792;uc010app.1;SIX4;chr14:61186039-61196039;
chr14:61927118-62163740	236622	chr14	61927118	61931568	chr14	62157674	62163740	7	5.79422e-21	No	Yes	uc010tsc.1;HIF1A;chr14:62157118-62167118;uc001xfq.2;HIF1A;chr14:62157118-62167118;uc001xfr.2;HIF1A;chr14:62157118-62167118;uc001xfs.2;HIF1A;chr14:62157118-62167118;
chr14:61930220-61941636	11416	chr14	61930220	61934900	chr14	61938282	61941636	4	6.0663e-15	No	Yes	uc010tsb.1;PRKCH;chr14:61938884-61948884;
chr14:61956059-62163238	207179	chr14	61956059	61959324	chr14	62161400	62163238	3	3.02633e-09	No	Yes	uc010tsc.1;HIF1A;chr14:62157118-62167118;uc001xfq.2;HIF1A;chr14:62157118-62167118;uc001xfr.2;HIF1A;chr14:62157118-62167118;uc001xfs.2;HIF1A;chr14:62157118-62167118;
chr14:61977511-62165213	187702	chr14	61977511	61984044	chr14	62160999	62165213	12	1.36779e-32	No	Yes	uc010tsc.1;HIF1A;chr14:62157118-62167118;uc001xfq.2;HIF1A;chr14:62157118-62167118;uc001xfr.2;HIF1A;chr14:62157118-62167118;uc001xfs.2;HIF1A;chr14:62157118-62167118;
chr14:61990578-62164912	174334	chr14	61990578	61995557	chr14	62160495	62164912	14	4.46791e-35	No	Yes	uc010tsc.1;HIF1A;chr14:62157118-62167118;uc001xfq.2;HIF1A;chr14:62157118-62167118;uc001xfr.2;HIF1A;chr14:62157118-62167118;uc001xfs.2;HIF1A;chr14:62157118-62167118;
chr14:61991292-62167983	176691	chr14	61991292	61994944	chr14	62164981	62167983	5	8.77007e-15	No	Yes	uc010tsc.1;HIF1A;chr14:62157118-62167118;uc001xfq.2;HIF1A;chr14:62157118-62167118;uc001xfr.2;HIF1A;chr14:62157118-62167118;uc001xfs.2;HIF1A;chr14:62157118-62167118;
chr14:61998952-62162294	163342	chr14	61998952	62001776	chr14	62159193	62162294	3	4.80033e-10	No	Yes	uc010tsc.1;HIF1A;chr14:62157118-62167118;uc001xfq.2;HIF1A;chr14:62157118-62167118;uc001xfr.2;HIF1A;chr14:62157118-62167118;uc001xfs.2;HIF1A;chr14:62157118-62167118;
chr14:64129538-64196157	66619	chr14	64129538	64132690	chr14	64192201	64196157	4	1.68817e-13	No	Yes	uc001xgj.2;SGPP1;chr14:64189756-64199756;
chr14:64142248-64195411	53163	chr14	64142248	64146398	chr14	64192369	64195411	6	1.13654e-20	No	Yes	uc001xgj.2;SGPP1;chr14:64189756-64199756;
chr14:64178892-64195310	16418	chr14	64178892	64181954	chr14	64193352	64195310	3	9.15782e-12	No	Yes	uc001xgj.2;SGPP1;chr14:64189756-64199756;
chr14:64662559-64684914	22355	chr14	64662559	64666637	chr14	64681435	64684914	4	2.65183e-17	No	Yes	uc010tsi.1;SYNE2;chr14:64675858-64685858;uc001xgs.2;SYNE2;chr14:64675858-64685858;uc001xgt.2;SYNE2;chr14:64677671-64687671;
chr14:64980297-65009570	29273	chr14	64980297	64983201	chr14	65006047	65009570	4	2.23904e-13	No	Yes	uc001xhj.2;HSPA2;chr14:64997622-65007622;uc001xhk.3;HSPA2;chr14:65002185-65012185;
chr14:65101784-65172923	71139	chr14	65101784	65105032	chr14	65169385	65172923	3	7.40086e-10	No	Yes	uc001xhn.1;PLEKHG3;chr14:65166192-65176192;uc001xho.1;PLEKHG3;chr14:65166192-65176192;
chr14:65138393-65173083	34690	chr14	65138393	65141206	chr14	65169744	65173083	3	1.62232e-10	No	Yes	uc001xhn.1;PLEKHG3;chr14:65166192-65176192;uc001xho.1;PLEKHG3;chr14:65166192-65176192;
chr14:65145652-65170172	24520	chr14	65145652	65150075	chr14	65165666	65170172	5	5.27945e-19	No	Yes	uc001xhn.1;PLEKHG3;chr14:65166192-65176192;uc001xho.1;PLEKHG3;chr14:65166192-65176192;
chr14:65264248-65381035	116787	chr14	65264248	65268196	chr14	65377647	65381035	3	1.23813e-11	No	Yes	uc001xhv.1;CHURC1;chr14:65376139-65386139;uc001xhw.1;CHURC1;chr14:65376139-65386139;uc010tsj.1;CHURC1;chr14:65376139-65386139;uc010tsk.1;CHURC1;chr14:65376139-65386139;uc010tsl.1;FNTB;chr14:65376139-65386139;uc010tsm.1;FNTB;chr14:65376139-65386139;
chr14:65323025-65453663	130638	chr14	65323025	65326234	chr14	65450738	65453663	4	1.92447e-15	No	Yes	uc001xib.2;BC052775;chr14:65448947-65458947;uc001xia.2;FNTB;chr14:65448506-65458506;
chr14:65424121-65434090	9969	chr14	65424121	65427590	chr14	65430879	65434090	3	7.2419e-12	No	Yes	uc010aqk.2;RAB15;chr14:65433612-65443612;uc001xhz.2;RAB15;chr14:65433875-65443875;
chr14:65544997-65571553	26556	chr14	65544997	65548177	chr14	65565453	65571553	5	1.44318e-18	No	Yes	uc001xic.1;MAX;chr14:65564227-65574227;uc001xie.1;MAX;chr14:65564227-65574227;uc010aql.1;MAX;chr14:65564227-65574227;uc001xif.1;MAX;chr14:65564227-65574227;uc001xig.1;MAX;chr14:65564227-65574227;uc001xih.1;MAX;chr14:65564227-65574227;uc001xii.1;MAX;chr14:65564227-65574227;uc001xij.1;MAX;chr14:65564227-65574227;uc001xik.2;MAX;chr14:65564227-65574227;
chr14:65556086-65569779	13693	chr14	65556086	65557952	chr14	65566751	65569779	3	1.93021e-12	No	Yes	uc001xic.1;MAX;chr14:65564227-65574227;uc001xie.1;MAX;chr14:65564227-65574227;uc010aql.1;MAX;chr14:65564227-65574227;uc001xif.1;MAX;chr14:65564227-65574227;uc001xig.1;MAX;chr14:65564227-65574227;uc001xih.1;MAX;chr14:65564227-65574227;uc001xii.1;MAX;chr14:65564227-65574227;uc001xij.1;MAX;chr14:65564227-65574227;uc001xik.2;MAX;chr14:65564227-65574227;
chr14:65630699-65881184	250485	chr14	65630699	65635625	chr14	65877685	65881184	7	4.86573e-21	No	Yes	uc001xim.3;hCG_2028511;chr14:65874335-65884335;uc001xin.2;FUT8;chr14:65872839-65882839;uc001xio.2;FUT8;chr14:65872839-65882839;uc010tsp.1;FUT8;chr14:65872839-65882839;uc001xir.3;FUT8;chr14:65872839-65882839;uc001xip.2;FUT8;chr14:65874534-65884534;uc001xiq.2;FUT8;chr14:65874534-65884534;
chr14:65645421-65880498	235077	chr14	65645421	65648212	chr14	65877162	65880498	3	1.91637e-09	No	Yes	uc001xim.3;hCG_2028511;chr14:65874335-65884335;uc001xin.2;FUT8;chr14:65872839-65882839;uc001xio.2;FUT8;chr14:65872839-65882839;uc010tsp.1;FUT8;chr14:65872839-65882839;uc001xir.3;FUT8;chr14:65872839-65882839;uc001xip.2;FUT8;chr14:65874534-65884534;uc001xiq.2;FUT8;chr14:65874534-65884534;
chr14:65681059-65694149	13090	chr14	65681059	65683272	chr14	65691597	65694149	3	4.21065e-12	No	Yes	uc001xil.2;BX161428;chr14:65684065-65694065;
chr14:65703585-65880566	176981	chr14	65703585	65706555	chr14	65877263	65880566	3	1.40652e-08	No	Yes	uc001xim.3;hCG_2028511;chr14:65874335-65884335;uc001xin.2;FUT8;chr14:65872839-65882839;uc001xio.2;FUT8;chr14:65872839-65882839;uc010tsp.1;FUT8;chr14:65872839-65882839;uc001xir.3;FUT8;chr14:65872839-65882839;uc001xip.2;FUT8;chr14:65874534-65884534;uc001xiq.2;FUT8;chr14:65874534-65884534;
chr14:65711767-65880952	169185	chr14	65711767	65715817	chr14	65877100	65880952	4	7.60853e-12	No	Yes	uc001xim.3;hCG_2028511;chr14:65874335-65884335;uc001xin.2;FUT8;chr14:65872839-65882839;uc001xio.2;FUT8;chr14:65872839-65882839;uc010tsp.1;FUT8;chr14:65872839-65882839;uc001xir.3;FUT8;chr14:65872839-65882839;uc001xip.2;FUT8;chr14:65874534-65884534;uc001xiq.2;FUT8;chr14:65874534-65884534;
chr14:65720143-65883583	163440	chr14	65720143	65726834	chr14	65876571	65883583	24	0	No	Yes	uc001xim.3;hCG_2028511;chr14:65874335-65884335;uc001xin.2;FUT8;chr14:65872839-65882839;uc001xio.2;FUT8;chr14:65872839-65882839;uc010tsp.1;FUT8;chr14:65872839-65882839;uc001xir.3;FUT8;chr14:65872839-65882839;uc001xip.2;FUT8;chr14:65874534-65884534;uc001xiq.2;FUT8;chr14:65874534-65884534;
chr14:65721681-65875727	154046	chr14	65721681	65725033	chr14	65872611	65875727	3	5.0562e-10	No	Yes	uc001xim.3;hCG_2028511;chr14:65874335-65884335;uc001xin.2;FUT8;chr14:65872839-65882839;uc001xio.2;FUT8;chr14:65872839-65882839;uc010tsp.1;FUT8;chr14:65872839-65882839;uc001xir.3;FUT8;chr14:65872839-65882839;uc001xip.2;FUT8;chr14:65874534-65884534;uc001xiq.2;FUT8;chr14:65874534-65884534;
chr14:65820651-65881062	60411	chr14	65820651	65828097	chr14	65876794	65881062	12	3.19375e-34	No	Yes	uc001xim.3;hCG_2028511;chr14:65874335-65884335;uc001xin.2;FUT8;chr14:65872839-65882839;uc001xio.2;FUT8;chr14:65872839-65882839;uc010tsp.1;FUT8;chr14:65872839-65882839;uc001xir.3;FUT8;chr14:65872839-65882839;uc001xip.2;FUT8;chr14:65874534-65884534;uc001xiq.2;FUT8;chr14:65874534-65884534;
chr14:65846264-65880691	34427	chr14	65846264	65850153	chr14	65876897	65880691	3	1.58663e-09	No	Yes	uc001xim.3;hCG_2028511;chr14:65874335-65884335;uc001xin.2;FUT8;chr14:65872839-65882839;uc001xio.2;FUT8;chr14:65872839-65882839;uc010tsp.1;FUT8;chr14:65872839-65882839;uc001xir.3;FUT8;chr14:65872839-65882839;uc001xip.2;FUT8;chr14:65874534-65884534;uc001xiq.2;FUT8;chr14:65874534-65884534;
chr14:65862260-65880398	18138	chr14	65862260	65865116	chr14	65877901	65880398	3	3.39969e-10	No	Yes	uc001xim.3;hCG_2028511;chr14:65874335-65884335;uc001xin.2;FUT8;chr14:65872839-65882839;uc001xio.2;FUT8;chr14:65872839-65882839;uc010tsp.1;FUT8;chr14:65872839-65882839;uc001xir.3;FUT8;chr14:65872839-65882839;uc001xip.2;FUT8;chr14:65874534-65884534;uc001xiq.2;FUT8;chr14:65874534-65884534;
chr14:67905347-67913458	8111	chr14	67905347	67909581	chr14	67910280	67913458	4	1.65417e-17	No	Yes	uc001xji.1;AX746582;chr14:67909649-67919649;
chr14:67991075-68143917	152842	chr14	67991075	67994647	chr14	68140886	68143917	3	4.94826e-10	No	Yes	uc001xjt.2;VTI1B;chr14:68136602-68146602;uc010aqp.2;VTI1B;chr14:68136602-68146602;uc001xju.2;VTI1B;chr14:68136602-68146602;
chr14:68123842-68143249	19407	chr14	68123842	68128225	chr14	68139646	68143249	5	1.02582e-17	No	Yes	uc001xjt.2;VTI1B;chr14:68136602-68146602;uc010aqp.2;VTI1B;chr14:68136602-68146602;uc001xju.2;VTI1B;chr14:68136602-68146602;
chr14:68351021-69257229	906208	chr14	68351021	68355555	chr14	69252888	69257229	4	2.95375e-11	No	Yes	uc001xkh.1;ZFP36L1;chr14:69254785-69264785;uc001xki.1;ZFP36L1;chr14:69254785-69264785;
chr14:68352272-69262334	910062	chr14	68352272	68355022	chr14	69258244	69262334	3	7.78143e-08	No	Yes	uc001xkh.1;ZFP36L1;chr14:69254785-69264785;uc001xki.1;ZFP36L1;chr14:69254785-69264785;uc001xkj.1;C14orf181;chr14:69258190-69268190;
chr14:68399422-69256728	857306	chr14	68399422	68401519	chr14	69254467	69256728	3	1.36215e-09	No	Yes	uc001xkh.1;ZFP36L1;chr14:69254785-69264785;uc001xki.1;ZFP36L1;chr14:69254785-69264785;
chr14:68425055-69260317	835262	chr14	68425055	68428932	chr14	69256531	69260317	3	7.05904e-08	No	Yes	uc001xkh.1;ZFP36L1;chr14:69254785-69264785;uc001xki.1;ZFP36L1;chr14:69254785-69264785;uc001xkj.1;C14orf181;chr14:69258190-69268190;
chr14:68436871-69263315	826444	chr14	68436871	68439999	chr14	69260948	69263315	4	4.54017e-10	No	Yes	uc001xkh.1;ZFP36L1;chr14:69254785-69264785;uc001xki.1;ZFP36L1;chr14:69254785-69264785;uc001xkj.1;C14orf181;chr14:69258190-69268190;
chr14:68601379-69263440	662061	chr14	68601379	68608308	chr14	69256404	69263440	24	2.8026e-45	No	Yes	uc001xkh.1;ZFP36L1;chr14:69254785-69264785;uc001xki.1;ZFP36L1;chr14:69254785-69264785;uc001xkj.1;C14orf181;chr14:69258190-69268190;
chr14:68610567-69261622	651055	chr14	68610567	68614187	chr14	69258948	69261622	5	6.31864e-12	No	Yes	uc001xkh.1;ZFP36L1;chr14:69254785-69264785;uc001xki.1;ZFP36L1;chr14:69254785-69264785;uc001xkj.1;C14orf181;chr14:69258190-69268190;
chr14:68624109-69262664	638555	chr14	68624109	68626673	chr14	69260715	69262664	3	1.08335e-08	No	Yes	uc001xkh.1;ZFP36L1;chr14:69254785-69264785;uc001xki.1;ZFP36L1;chr14:69254785-69264785;uc001xkj.1;C14orf181;chr14:69258190-69268190;
chr14:68632963-69259265	626302	chr14	68632963	68636624	chr14	69255209	69259265	3	1.18506e-07	No	Yes	uc001xkh.1;ZFP36L1;chr14:69254785-69264785;uc001xki.1;ZFP36L1;chr14:69254785-69264785;uc001xkj.1;C14orf181;chr14:69258190-69268190;
chr14:68641980-69262968	620988	chr14	68641980	68649731	chr14	69257226	69262968	9	1.73301e-18	No	Yes	uc001xkh.1;ZFP36L1;chr14:69254785-69264785;uc001xki.1;ZFP36L1;chr14:69254785-69264785;uc001xkj.1;C14orf181;chr14:69258190-69268190;
chr14:68651292-69262881	611589	chr14	68651292	68653476	chr14	69259431	69262881	3	3.65785e-08	No	Yes	uc001xkh.1;ZFP36L1;chr14:69254785-69264785;uc001xki.1;ZFP36L1;chr14:69254785-69264785;uc001xkj.1;C14orf181;chr14:69258190-69268190;
chr14:68655659-69258776	603117	chr14	68655659	68659360	chr14	69256551	69258776	5	4.91045e-13	No	Yes	uc001xkh.1;ZFP36L1;chr14:69254785-69264785;uc001xki.1;ZFP36L1;chr14:69254785-69264785;uc001xkj.1;C14orf181;chr14:69258190-69268190;
chr14:68656551-69264057	607506	chr14	68656551	68662158	chr14	69259506	69264057	11	1.2485e-21	No	Yes	uc001xkh.1;ZFP36L1;chr14:69254785-69264785;uc001xki.1;ZFP36L1;chr14:69254785-69264785;uc001xkj.1;C14orf181;chr14:69258190-69268190;
chr14:68659031-69256012	596981	chr14	68659031	68663058	chr14	69251667	69256012	5	2.4827e-12	No	Yes	uc001xkh.1;ZFP36L1;chr14:69254785-69264785;uc001xki.1;ZFP36L1;chr14:69254785-69264785;
chr14:68674848-69263504	588656	chr14	68674848	68680641	chr14	69259721	69263504	7	1.39432e-15	No	Yes	uc001xkh.1;ZFP36L1;chr14:69254785-69264785;uc001xki.1;ZFP36L1;chr14:69254785-69264785;uc001xkj.1;C14orf181;chr14:69258190-69268190;
chr14:68690213-69259011	568798	chr14	68690213	68692806	chr14	69257139	69259011	3	3.38844e-10	No	Yes	uc001xkh.1;ZFP36L1;chr14:69254785-69264785;uc001xki.1;ZFP36L1;chr14:69254785-69264785;uc001xkj.1;C14orf181;chr14:69258190-69268190;
chr14:68698187-69262470	564283	chr14	68698187	68701712	chr14	69259612	69262470	4	6.75936e-09	No	Yes	uc001xkh.1;ZFP36L1;chr14:69254785-69264785;uc001xki.1;ZFP36L1;chr14:69254785-69264785;uc001xkj.1;C14orf181;chr14:69258190-69268190;
chr14:68707314-69263614	556300	chr14	68707314	68710614	chr14	69260010	69263614	5	3.62013e-13	No	Yes	uc001xkh.1;ZFP36L1;chr14:69254785-69264785;uc001xki.1;ZFP36L1;chr14:69254785-69264785;uc001xkj.1;C14orf181;chr14:69258190-69268190;
chr14:68739624-69259570	519946	chr14	68739624	68742701	chr14	69255913	69259570	3	2.71734e-08	No	Yes	uc001xkh.1;ZFP36L1;chr14:69254785-69264785;uc001xki.1;ZFP36L1;chr14:69254785-69264785;uc001xkj.1;C14orf181;chr14:69258190-69268190;
chr14:68741150-69262299	521149	chr14	68741150	68743310	chr14	69260106	69262299	3	2.43185e-08	No	Yes	uc001xkh.1;ZFP36L1;chr14:69254785-69264785;uc001xki.1;ZFP36L1;chr14:69254785-69264785;uc001xkj.1;C14orf181;chr14:69258190-69268190;
chr14:68748777-69259818	511041	chr14	68748777	68751807	chr14	69257794	69259818	3	2.68848e-08	No	Yes	uc001xkh.1;ZFP36L1;chr14:69254785-69264785;uc001xki.1;ZFP36L1;chr14:69254785-69264785;uc001xkj.1;C14orf181;chr14:69258190-69268190;
chr14:68765970-69262573	496603	chr14	68765970	68770223	chr14	69260401	69262573	5	3.67453e-14	No	Yes	uc001xkh.1;ZFP36L1;chr14:69254785-69264785;uc001xki.1;ZFP36L1;chr14:69254785-69264785;uc001xkj.1;C14orf181;chr14:69258190-69268190;
chr14:68771546-69265678	494132	chr14	68771546	68782546	chr14	69251132	69265678	35	0	No	Yes	uc001xkh.1;ZFP36L1;chr14:69254785-69264785;uc001xki.1;ZFP36L1;chr14:69254785-69264785;uc001xkj.1;C14orf181;chr14:69258190-69268190;
chr14:68827778-69256304	428526	chr14	68827778	68831796	chr14	69251511	69256304	4	7.21322e-11	No	Yes	uc001xkh.1;ZFP36L1;chr14:69254785-69264785;uc001xki.1;ZFP36L1;chr14:69254785-69264785;
chr14:68853558-69263299	409741	chr14	68853558	68855258	chr14	69259341	69263299	3	1.90416e-08	No	Yes	uc001xkh.1;ZFP36L1;chr14:69254785-69264785;uc001xki.1;ZFP36L1;chr14:69254785-69264785;uc001xkj.1;C14orf181;chr14:69258190-69268190;
chr14:68862313-69264039	401726	chr14	68862313	68866033	chr14	69260307	69264039	7	1.62603e-15	No	Yes	uc001xkh.1;ZFP36L1;chr14:69254785-69264785;uc001xki.1;ZFP36L1;chr14:69254785-69264785;uc001xkj.1;C14orf181;chr14:69258190-69268190;
chr14:68862766-69259874	397108	chr14	68862766	68869873	chr14	69251663	69259874	10	1.84319e-20	No	Yes	uc001xkh.1;ZFP36L1;chr14:69254785-69264785;uc001xki.1;ZFP36L1;chr14:69254785-69264785;uc001xkj.1;C14orf181;chr14:69258190-69268190;
chr14:68924822-69265713	340891	chr14	68924822	68938526	chr14	69257377	69265713	29	0	No	Yes	uc001xkh.1;ZFP36L1;chr14:69254785-69264785;uc001xki.1;ZFP36L1;chr14:69254785-69264785;uc001xkj.1;C14orf181;chr14:69258190-69268190;
chr14:68926331-69257263	330932	chr14	68926331	68929151	chr14	69254236	69257263	3	1.00216e-08	No	Yes	uc001xkh.1;ZFP36L1;chr14:69254785-69264785;uc001xki.1;ZFP36L1;chr14:69254785-69264785;
chr14:68931679-69257130	325451	chr14	68931679	68940045	chr14	69251548	69257130	11	4.39745e-25	No	Yes	uc001xkh.1;ZFP36L1;chr14:69254785-69264785;uc001xki.1;ZFP36L1;chr14:69254785-69264785;
chr14:68951909-69254907	302998	chr14	68951909	68954221	chr14	69252070	69254907	3	7.23294e-10	No	Yes	uc001xkh.1;ZFP36L1;chr14:69254785-69264785;uc001xki.1;ZFP36L1;chr14:69254785-69264785;
chr14:68976640-69263690	287050	chr14	68976640	68979821	chr14	69259766	69263690	3	2.66119e-07	No	Yes	uc001xkh.1;ZFP36L1;chr14:69254785-69264785;uc001xki.1;ZFP36L1;chr14:69254785-69264785;uc001xkj.1;C14orf181;chr14:69258190-69268190;
chr14:68984084-69262203	278119	chr14	68984084	68986661	chr14	69258955	69262203	4	3.11239e-10	No	Yes	uc001xkh.1;ZFP36L1;chr14:69254785-69264785;uc001xki.1;ZFP36L1;chr14:69254785-69264785;uc001xkj.1;C14orf181;chr14:69258190-69268190;
chr14:68986084-69255560	269476	chr14	68986084	68990937	chr14	69249749	69255560	7	6.94525e-19	No	Yes	uc001xkh.1;ZFP36L1;chr14:69254785-69264785;uc001xki.1;ZFP36L1;chr14:69254785-69264785;
chr14:68987315-69263580	276265	chr14	68987315	68991799	chr14	69260586	69263580	4	1.36878e-09	No	Yes	uc001xkh.1;ZFP36L1;chr14:69254785-69264785;uc001xki.1;ZFP36L1;chr14:69254785-69264785;uc001xkj.1;C14orf181;chr14:69258190-69268190;
chr14:69003922-69260047	256125	chr14	69003922	69007873	chr14	69256897	69260047	3	2.69667e-08	No	Yes	uc001xkh.1;ZFP36L1;chr14:69254785-69264785;uc001xki.1;ZFP36L1;chr14:69254785-69264785;uc001xkj.1;C14orf181;chr14:69258190-69268190;
chr14:69027748-69264472	236724	chr14	69027748	69038857	chr14	69257974	69264472	24	0	No	Yes	uc001xkh.1;ZFP36L1;chr14:69254785-69264785;uc001xki.1;ZFP36L1;chr14:69254785-69264785;uc001xkj.1;C14orf181;chr14:69258190-69268190;
chr14:69029510-69256211	226701	chr14	69029510	69035367	chr14	69250877	69256211	7	1.88726e-17	No	Yes	uc001xkh.1;ZFP36L1;chr14:69254785-69264785;uc001xki.1;ZFP36L1;chr14:69254785-69264785;
chr14:69042594-69261368	218774	chr14	69042594	69046267	chr14	69258129	69261368	4	9.4159e-10	No	Yes	uc001xkh.1;ZFP36L1;chr14:69254785-69264785;uc001xki.1;ZFP36L1;chr14:69254785-69264785;uc001xkj.1;C14orf181;chr14:69258190-69268190;
chr14:69054452-69254831	200379	chr14	69054452	69058686	chr14	69249853	69254831	4	1.19009e-11	No	Yes	uc001xkh.1;ZFP36L1;chr14:69254785-69264785;uc001xki.1;ZFP36L1;chr14:69254785-69264785;
chr14:69090615-69264188	173573	chr14	69090615	69103406	chr14	69249821	69264188	29	0	No	Yes	uc001xkh.1;ZFP36L1;chr14:69254785-69264785;uc001xki.1;ZFP36L1;chr14:69254785-69264785;uc001xkj.1;C14orf181;chr14:69258190-69268190;
chr14:69128066-69256689	128623	chr14	69128066	69130361	chr14	69254081	69256689	3	9.14766e-10	No	Yes	uc001xkh.1;ZFP36L1;chr14:69254785-69264785;uc001xki.1;ZFP36L1;chr14:69254785-69264785;
chr14:69135163-69256007	120844	chr14	69135163	69138433	chr14	69253381	69256007	3	5.7271e-09	No	Yes	uc001xkh.1;ZFP36L1;chr14:69254785-69264785;uc001xki.1;ZFP36L1;chr14:69254785-69264785;
chr14:69142355-69259455	117100	chr14	69142355	69144666	chr14	69256973	69259455	3	6.2437e-09	No	Yes	uc001xkh.1;ZFP36L1;chr14:69254785-69264785;uc001xki.1;ZFP36L1;chr14:69254785-69264785;uc001xkj.1;C14orf181;chr14:69258190-69268190;
chr14:69156382-69261819	105437	chr14	69156382	69159264	chr14	69259073	69261819	3	7.30666e-09	No	Yes	uc001xkh.1;ZFP36L1;chr14:69254785-69264785;uc001xki.1;ZFP36L1;chr14:69254785-69264785;uc001xkj.1;C14orf181;chr14:69258190-69268190;
chr14:69380500-69447694	67194	chr14	69380500	69382470	chr14	69444271	69447694	3	1.07138e-10	No	Yes	uc010ttb.1;ACTN1;chr14:69439283-69449283;uc001xko.1;ACTN1;chr14:69439971-69449971;uc010ttd.1;ACTN1;chr14:69439986-69449986;uc001xkm.2;ACTN1;chr14:69441083-69451083;uc001xkl.2;ACTN1;chr14:69441083-69451083;uc001xkn.2;ACTN1;chr14:69441083-69451083;
chr14:69398472-69448091	49619	chr14	69398472	69402784	chr14	69442445	69448091	6	4.719e-19	No	Yes	uc010ttb.1;ACTN1;chr14:69439283-69449283;uc001xko.1;ACTN1;chr14:69439971-69449971;uc010ttd.1;ACTN1;chr14:69439986-69449986;uc001xkm.2;ACTN1;chr14:69441083-69451083;uc001xkl.2;ACTN1;chr14:69441083-69451083;uc001xkn.2;ACTN1;chr14:69441083-69451083;
chr14:69402982-69448017	45035	chr14	69402982	69422523	chr14	69436263	69448017	46	0	No	Yes	uc010ttb.1;ACTN1;chr14:69439283-69449283;uc001xko.1;ACTN1;chr14:69439971-69449971;uc010ttd.1;ACTN1;chr14:69439986-69449986;uc001xkm.2;ACTN1;chr14:69441083-69451083;uc001xkl.2;ACTN1;chr14:69441083-69451083;uc001xkn.2;ACTN1;chr14:69441083-69451083;
chr14:69595020-69660377	65357	chr14	69595020	69597748	chr14	69657306	69660377	4	1.3071e-15	No	Yes	uc001xkx.2;DKFZp762G166;chr14:69653482-69663482;uc001xkt.2;EXD2;chr14:69653245-69663245;uc001xku.2;EXD2;chr14:69653245-69663245;uc001xkv.2;EXD2;chr14:69653245-69663245;uc001xkw.2;EXD2;chr14:69653245-69663245;uc010aqt.2;EXD2;chr14:69653482-69663482;uc010tte.1;EXD2;chr14:69653482-69663482;
chr14:69821220-69866738	45518	chr14	69821220	69824181	chr14	69864124	69866738	3	1.67082e-09	No	Yes	uc001xlc.2;ERH;chr14:69860021-69870021;uc001xld.3;UNQ714;chr14:69860406-69870406;uc010aqx.2;SLC39A9;chr14:69860406-69870406;uc001xle.2;SLC39A9;chr14:69860406-69870406;uc001xlf.3;SLC39A9;chr14:69860406-69870406;uc001xlg.3;SLC39A9;chr14:69860406-69870406;
chr14:69826604-69866792	40188	chr14	69826604	69828318	chr14	69864325	69866792	4	6.94911e-15	No	Yes	uc001xlc.2;ERH;chr14:69860021-69870021;uc001xld.3;UNQ714;chr14:69860406-69870406;uc010aqx.2;SLC39A9;chr14:69860406-69870406;uc001xle.2;SLC39A9;chr14:69860406-69870406;uc001xlf.3;SLC39A9;chr14:69860406-69870406;uc001xlg.3;SLC39A9;chr14:69860406-69870406;
chr14:70030422-70040590	10168	chr14	70030422	70032723	chr14	70038343	70040590	3	2.67015e-14	No	Yes	uc010aqy.2;PLPL;chr14:70032918-70042918;
chr14:70518251-70827603	309352	chr14	70518251	70521199	chr14	70825502	70827603	3	1.46414e-12	No	Yes	uc001xmb.2;COX16;chr14:70821444-70831444;
chr14:71092980-71110927	17947	chr14	71092980	71095123	chr14	71108146	71110927	3	4.76989e-13	No	Yes	uc001xmh.1;AK093892;chr14:71103015-71113015;uc001xmi.2;TTC9;chr14:71103503-71113503;
chr14:71221250-71280201	58951	chr14	71221250	71224192	chr14	71276370	71280201	4	1.61713e-14	No	Yes	uc001xml.2;MAP3K9;chr14:71270888-71280888;uc001xmm.2;MAP3K9;chr14:71270888-71280888;
chr14:71225781-71276710	50929	chr14	71225781	71229364	chr14	71273423	71276710	3	3.39918e-11	No	Yes	uc001xml.2;MAP3K9;chr14:71270888-71280888;uc001xmm.2;MAP3K9;chr14:71270888-71280888;
chr14:71258916-71278057	19141	chr14	71258916	71261246	chr14	71275354	71278057	3	3.12995e-11	No	Yes	uc001xml.2;MAP3K9;chr14:71270888-71280888;uc001xmm.2;MAP3K9;chr14:71270888-71280888;
chr14:73586105-73604771	18666	chr14	73586105	73589461	chr14	73601808	73604771	3	5.58564e-11	No	Yes	uc001xnq.3;PSEN1;chr14:73598142-73608142;uc001xnv.2;PSEN1;chr14:73598142-73608142;uc001xnr.2;PSEN1;chr14:73598142-73608142;uc010ark.2;PSEN1;chr14:73598524-73608524;
chr14:73946768-73959390	12622	chr14	73946768	73950065	chr14	73956050	73959390	4	4.76835e-15	No	Yes	uc001xok.1;C14orf169;chr14:73952643-73962643;
chr14:74160635-74181291	20656	chr14	74160635	74163846	chr14	74179176	74181291	4	3.87163e-14	No	Yes	uc001xor.1;PNMA1;chr14:74176128-74186128;
chr14:74166327-74180938	14611	chr14	74166327	74170888	chr14	74177249	74180938	7	4.08459e-25	No	Yes	uc001xor.1;PNMA1;chr14:74176128-74186128;
chr14:74443334-74487615	44281	chr14	74443334	74447361	chr14	74483939	74487615	6	1.60602e-22	No	Yes	uc001xpi.2;ENTPD5;chr14:74477633-74487633;uc010tuo.1;ENTPD5;chr14:74481026-74491026;uc010tup.1;C14orf45;chr14:74481058-74491058;
chr14:74452061-74487044	34983	chr14	74452061	74454333	chr14	74484268	74487044	3	2.70524e-12	No	Yes	uc001xpi.2;ENTPD5;chr14:74477633-74487633;uc010tuo.1;ENTPD5;chr14:74481026-74491026;uc010tup.1;C14orf45;chr14:74481058-74491058;
chr14:75033048-75080306	47258	chr14	75033048	75035379	chr14	75077783	75080306	3	1.00614e-10	No	Yes	uc001xqa.2;LTBP2;chr14:75074034-75084034;
chr14:75445738-75473621	27883	chr14	75445738	75449682	chr14	75467122	75473621	6	1.4549e-20	No	Yes	uc001xrc.1;EIF2B2;chr14:75464611-75474611;
chr14:75623819-75644226	20407	chr14	75623819	75626075	chr14	75641909	75644226	3	5.4685e-12	No	Yes	uc001xrm.1;TMED10;chr14:75638349-75648349;uc010ash.1;DKFZp451D084;chr14:75638349-75648349;
chr14:75773091-75895703	122612	chr14	75773091	75776422	chr14	75892877	75895703	5	3.08048e-19	No	Yes	uc010asj.2;JDP2;chr14:75889508-75899508;uc010tvb.1;JDP2;chr14:75889919-75899919;uc010tvc.1;JDP2;chr14:75890059-75900059;uc001xrq.2;JDP2;chr14:75893836-75903836;
chr14:75870454-75896689	26235	chr14	75870454	75873728	chr14	75893560	75896689	3	4.66206e-12	No	Yes	uc010asj.2;JDP2;chr14:75889508-75899508;uc010tvb.1;JDP2;chr14:75889919-75899919;uc010tvc.1;JDP2;chr14:75890059-75900059;uc001xrq.2;JDP2;chr14:75893836-75903836;
chr14:76026201-76040480	14279	chr14	76026201	76028549	chr14	76037154	76040480	3	2.29412e-11	No	Yes	uc001xrs.2;FLVCR2;chr14:76039939-76049939;
chr14:76141684-76453388	311704	chr14	76141684	76143429	chr14	76449469	76453388	3	3.16635e-12	No	Yes	uc001xsc.2;TGFB3;chr14:76443092-76453092;uc001xsd.2;TGFB3;chr14:76443092-76453092;uc001xse.2;C14orf179;chr14:76447095-76457095;uc001xsf.2;C14orf179;chr14:76447095-76457095;uc010asl.1;C14orf179;chr14:76447095-76457095;uc010asm.1;C14orf179;chr14:76447095-76457095;uc001xsg.2;C14orf179;chr14:76447095-76457095;uc010tve.1;C14orf179;chr14:76447095-76457095;
chr14:76296788-76450108	153320	chr14	76296788	76299921	chr14	76448228	76450108	3	4.35057e-11	No	Yes	uc001xsc.2;TGFB3;chr14:76443092-76453092;uc001xsd.2;TGFB3;chr14:76443092-76453092;uc001xse.2;C14orf179;chr14:76447095-76457095;uc001xsf.2;C14orf179;chr14:76447095-76457095;uc010asl.1;C14orf179;chr14:76447095-76457095;uc010asm.1;C14orf179;chr14:76447095-76457095;uc001xsg.2;C14orf179;chr14:76447095-76457095;uc010tve.1;C14orf179;chr14:76447095-76457095;
chr14:76371820-76449996	78176	chr14	76371820	76374681	chr14	76447406	76449996	3	1.8569e-11	No	Yes	uc001xsc.2;TGFB3;chr14:76443092-76453092;uc001xsd.2;TGFB3;chr14:76443092-76453092;uc001xse.2;C14orf179;chr14:76447095-76457095;uc001xsf.2;C14orf179;chr14:76447095-76457095;uc010asl.1;C14orf179;chr14:76447095-76457095;uc010asm.1;C14orf179;chr14:76447095-76457095;uc001xsg.2;C14orf179;chr14:76447095-76457095;uc010tve.1;C14orf179;chr14:76447095-76457095;
chr14:77336102-77555782	219680	chr14	77336102	77339948	chr14	77551914	77555782	4	1.18045e-13	No	Yes	uc001xsz.2;BC038792;chr14:77542598-77552598;uc001xtb.1;BC038792;chr14:77547788-77557788;
chr14:77339723-77495030	155307	chr14	77339723	77342603	chr14	77492432	77495030	3	3.60116e-09	No	Yes	uc001xsy.2;C14orf4;chr14:77490034-77500034;
chr14:77346512-77565412	218900	chr14	77346512	77350330	chr14	77561089	77565412	5	1.4986e-16	No	Yes	uc001xtd.2;KIAA1737;chr14:77559577-77569577;uc001xtc.1;KIAA1737;chr14:77559577-77569577;
chr14:77348553-77538820	190267	chr14	77348553	77351008	chr14	77536171	77538820	3	1.31826e-12	No	Yes	uc001xta.1;AK124327;chr14:77537534-77547534;
chr14:77390218-77500385	110167	chr14	77390218	77394466	chr14	77497036	77500385	4	1.05007e-12	No	Yes	uc001xsy.2;C14orf4;chr14:77490034-77500034;
chr14:77411576-77501531	89955	chr14	77411576	77414922	chr14	77498445	77501531	5	5.92983e-15	No	Yes	uc001xsy.2;C14orf4;chr14:77490034-77500034;
chr14:77418318-77501836	83518	chr14	77418318	77428169	chr14	77498168	77501836	20	0	No	Yes	uc001xsy.2;C14orf4;chr14:77490034-77500034;
chr14:77517189-77564888	47699	chr14	77517189	77520611	chr14	77562707	77564888	4	1.26704e-12	No	Yes	uc001xtd.2;KIAA1737;chr14:77559577-77569577;uc001xtc.1;KIAA1737;chr14:77559577-77569577;
chr14:77575734-77609644	33910	chr14	77575734	77577986	chr14	77606496	77609644	3	3.73426e-11	No	Yes	uc010asp.2;ZDHHC22;chr14:77603134-77613134;
chr14:77615901-77773448	157547	chr14	77615901	77620043	chr14	77770910	77773448	3	2.26768e-10	No	Yes	uc001xth.1;POMT2;chr14:77762506-77772506;
chr14:77621398-77789294	167896	chr14	77621398	77624327	chr14	77786933	77789294	4	1.25227e-13	No	Yes	uc001xti.2;POMT2;chr14:77782225-77792225;uc010asr.2;POMT2;chr14:77782225-77792225;uc001xtl.2;BC069047;chr14:77782405-77792405;uc001xtj.2;GSTZ1;chr14:77782229-77792229;uc001xtk.2;GSTZ1;chr14:77782229-77792229;uc010ass.2;GSTZ1;chr14:77782229-77792229;uc001xtm.2;GSTZ1;chr14:77782705-77792705;
chr14:77623679-77793958	170279	chr14	77623679	77628078	chr14	77791213	77793958	3	8.29219e-11	No	Yes	uc001xti.2;POMT2;chr14:77782225-77792225;uc010asr.2;POMT2;chr14:77782225-77792225;uc001xtl.2;BC069047;chr14:77782405-77792405;uc001xtj.2;GSTZ1;chr14:77782229-77792229;uc001xtk.2;GSTZ1;chr14:77782229-77792229;uc010ass.2;GSTZ1;chr14:77782229-77792229;uc001xtm.2;GSTZ1;chr14:77782705-77792705;
chr14:77751328-77788655	37327	chr14	77751328	77755884	chr14	77785355	77788655	4	3.8518e-12	No	Yes	uc001xti.2;POMT2;chr14:77782225-77792225;uc010asr.2;POMT2;chr14:77782225-77792225;uc001xtl.2;BC069047;chr14:77782405-77792405;uc001xtj.2;GSTZ1;chr14:77782229-77792229;uc001xtk.2;GSTZ1;chr14:77782229-77792229;uc010ass.2;GSTZ1;chr14:77782229-77792229;uc001xtm.2;GSTZ1;chr14:77782705-77792705;
chr14:78116603-78176058	59455	chr14	78116603	78122891	chr14	78172785	78176058	7	6.37599e-24	No	Yes	uc001xuc.1;ALKBH1;chr14:78169356-78179356;uc001xud.1;ALKBH1;chr14:78169356-78179356;uc001xue.3;C14orf156;chr14:78169424-78179424;
chr14:78145857-78175520	29663	chr14	78145857	78148967	chr14	78171085	78175520	5	4.06752e-18	No	Yes	uc001xuc.1;ALKBH1;chr14:78169356-78179356;uc001xud.1;ALKBH1;chr14:78169356-78179356;uc001xue.3;C14orf156;chr14:78169424-78179424;
chr14:78165706-78178608	12902	chr14	78165706	78168281	chr14	78176436	78178608	3	6.65448e-13	No	Yes	uc001xuc.1;ALKBH1;chr14:78169356-78179356;uc001xud.1;ALKBH1;chr14:78169356-78179356;uc001xue.3;C14orf156;chr14:78169424-78179424;
chr14:88655548-89029812	374264	chr14	88655548	88657745	chr14	89025682	89029812	3	7.95614e-12	No	Yes	uc001xwv.3;PTPN21;chr14:89016123-89026123;uc001xww.2;ZC3H14;chr14:89024252-89034252;uc010twd.1;ZC3H14;chr14:89024252-89034252;uc010twe.1;ZC3H14;chr14:89024252-89034252;uc001xwx.2;ZC3H14;chr14:89024252-89034252;uc010twf.1;DKFZp434D1620;chr14:89024252-89034252;uc001xwy.2;ZC3H14;chr14:89024690-89034690;
chr14:88957114-89021846	64732	chr14	88957114	88959906	chr14	89019641	89021846	3	1.46733e-11	No	Yes	uc010twc.1;PTPN21;chr14:89011963-89021963;uc010atf.1;PTPN21;chr14:89012833-89022833;uc001xwv.3;PTPN21;chr14:89016123-89026123;
chr14:89007521-89018696	11175	chr14	89007521	89010719	chr14	89014116	89018696	4	2.03377e-16	No	Yes	uc010twc.1;PTPN21;chr14:89011963-89021963;uc010atf.1;PTPN21;chr14:89012833-89022833;uc001xwv.3;PTPN21;chr14:89016123-89026123;
chr14:89008190-89031389	23199	chr14	89008190	89010913	chr14	89027737	89031389	4	1.57192e-14	No	Yes	uc001xww.2;ZC3H14;chr14:89024252-89034252;uc010twd.1;ZC3H14;chr14:89024252-89034252;uc010twe.1;ZC3H14;chr14:89024252-89034252;uc001xwx.2;ZC3H14;chr14:89024252-89034252;uc010twf.1;DKFZp434D1620;chr14:89024252-89034252;uc001xwy.2;ZC3H14;chr14:89024690-89034690;
chr14:89008201-89022102	13901	chr14	89008201	89010550	chr14	89019622	89022102	4	9.33325e-16	No	Yes	uc010twc.1;PTPN21;chr14:89011963-89021963;uc010atf.1;PTPN21;chr14:89012833-89022833;uc001xwv.3;PTPN21;chr14:89016123-89026123;
chr14:89807924-89883913	75989	chr14	89807924	89811503	chr14	89881935	89883913	3	8.02157e-12	No	Yes	uc001xxn.3;FOXN3;chr14:89878454-89888454;uc001xxq.2;AF088054;chr14:89878697-89888697;
chr14:90786621-90865564	78943	chr14	90786621	90789619	chr14	90862687	90865564	4	2.11998e-12	No	Yes	uc001xyl.1;CALM1;chr14:90858372-90868372;uc010atq.1;CALM1;chr14:90858372-90868372;uc010atr.1;CALM1;chr14:90858372-90868372;uc001xym.1;CALM1;chr14:90859608-90869608;
chr14:90788427-90799690	11263	chr14	90788427	90791763	chr14	90797649	90799690	4	3.07697e-15	No	Yes	uc001xyi.1;C14orf102;chr14:90793279-90803279;uc001xyj.1;C14orf102;chr14:90793279-90803279;
chr14:91788657-91977643	188986	chr14	91788657	91791871	chr14	91975207	91977643	3	2.50448e-09	No	Yes	uc001xzp.1;SMEK1;chr14:91971048-91981048;uc001xzm.2;SMEK1;chr14:91971644-91981644;uc001xzn.2;SMEK1;chr14:91971813-91981813;uc001xzo.2;SMEK1;chr14:91971813-91981813;uc010atz.2;SMEK1;chr14:91971813-91981813;
chr14:91833752-91884431	50679	chr14	91833752	91836712	chr14	91882097	91884431	3	1.63504e-10	No	Yes	uc010twk.1;CCDC88C;chr14:91878182-91888182;uc010aty.2;CCDC88C;chr14:91879133-91889133;uc001xzl.3;CCDC88C;chr14:91879133-91889133;
chr14:91836904-91885772	48868	chr14	91836904	91839912	chr14	91883975	91885772	3	1.54183e-10	No	Yes	uc010twk.1;CCDC88C;chr14:91878182-91888182;uc010aty.2;CCDC88C;chr14:91879133-91889133;uc001xzl.3;CCDC88C;chr14:91879133-91889133;
chr14:91843264-91885336	42072	chr14	91843264	91847305	chr14	91881585	91885336	5	4.99964e-16	No	Yes	uc010twk.1;CCDC88C;chr14:91878182-91888182;uc010aty.2;CCDC88C;chr14:91879133-91889133;uc001xzl.3;CCDC88C;chr14:91879133-91889133;
chr14:91848771-91885566	36795	chr14	91848771	91851795	chr14	91883295	91885566	3	4.2065e-10	No	Yes	uc010twk.1;CCDC88C;chr14:91878182-91888182;uc010aty.2;CCDC88C;chr14:91879133-91889133;uc001xzl.3;CCDC88C;chr14:91879133-91889133;
chr14:91852217-91885316	33099	chr14	91852217	91855662	chr14	91883397	91885316	3	2.3746e-10	No	Yes	uc010twk.1;CCDC88C;chr14:91878182-91888182;uc010aty.2;CCDC88C;chr14:91879133-91889133;uc001xzl.3;CCDC88C;chr14:91879133-91889133;
chr14:91923032-91950806	27774	chr14	91923032	91926273	chr14	91946741	91950806	3	5.85987e-13	No	Yes	uc001xzq.1;SMEK1;chr14:91943537-91953537;
chr14:92211715-92302537	90822	chr14	92211715	92213973	chr14	92300065	92302537	3	1.87391e-11	No	Yes	uc001xzu.3;TC2N;chr14:92297849-92307849;uc001xzt.3;TC2N;chr14:92297849-92307849;uc010auc.2;TC2N;chr14:92297849-92307849;
chr14:93106423-93114768	8345	chr14	93106423	93110351	chr14	93112354	93114768	4	1.56324e-18	No	Yes	uc001yar.1;RIN3;chr14:93112926-93122926;uc001yas.1;RIN3;chr14:93112926-93122926;
chr14:93153376-93263570	110194	chr14	93153376	93155197	chr14	93260353	93263570	3	3.84883e-11	No	Yes	uc001yaz.1;GOLGA5;chr14:93255649-93265649;
chr14:93158235-93215081	56846	chr14	93158235	93160502	chr14	93212618	93215081	3	7.47959e-12	No	Yes	uc001yav.2;LGMN;chr14:93210012-93220012;uc001yaw.2;LGMN;chr14:93210012-93220012;uc010aul.2;LGMN;chr14:93210012-93220012;uc001yax.2;LGMN;chr14:93210012-93220012;uc001yay.2;LGMN;chr14:93210012-93220012;
chr14:93416929-93583710	166781	chr14	93416929	93421638	chr14	93580032	93583710	5	9.23419e-17	No	Yes	uc001ybf.2;ITPK1;chr14:93576650-93586650;uc001ybe.2;ITPK1;chr14:93577263-93587263;uc001ybg.2;ITPK1;chr14:93577263-93587263;uc001ybh.2;ITPK1;chr14:93577263-93587263;
chr14:93434967-93583469	148502	chr14	93434967	93438883	chr14	93581759	93583469	4	1.07896e-14	No	Yes	uc001ybf.2;ITPK1;chr14:93576650-93586650;uc001ybe.2;ITPK1;chr14:93577263-93587263;uc001ybg.2;ITPK1;chr14:93577263-93587263;uc001ybh.2;ITPK1;chr14:93577263-93587263;
chr14:93609760-93652356	42596	chr14	93609760	93612845	chr14	93650114	93652356	3	2.54575e-11	No	Yes	uc001ybj.2;MOAP1;chr14:93646249-93656249;uc001ybk.3;C14orf109;chr14:93646295-93656295;uc010auo.2;C14orf109;chr14:93646374-93656374;
chr14:94455202-94464248	9046	chr14	94455202	94458289	chr14	94459432	94464248	5	1.00401e-21	No	Yes	uc001ycf.2;C14orf48;chr14:94458615-94468615;uc001ycg.1;C14orf48;chr14:94458641-94468641;uc010twp.1;C14orf48;chr14:94458641-94468641;
chr14:94515062-94548949	33887	chr14	94515062	94516896	chr14	94545795	94548949	3	3.96668e-12	No	Yes	uc001ycj.2;DDX24;chr14:94542558-94552558;uc010twq.1;DDX24;chr14:94542558-94552558;uc010twr.1;DDX24;chr14:94542558-94552558;uc001ycl.2;IFI27L1;chr14:94542638-94552638;uc001yck.2;IFI27L1;chr14:94542638-94552638;
chr14:94906799-94915422	8623	chr14	94906799	94908721	chr14	94910562	94915422	4	1.49362e-17	No	Yes	uc001ydd.1;SERPINA11;chr14:94914122-94924122;
chr14:95035362-95045061	9699	chr14	95035362	95039534	chr14	95041628	95045061	4	1.62789e-17	No	Yes	uc001ydn.1;SERPINA5;chr14:95042821-95052821;uc010ave.2;SERPINA5;chr14:95042730-95052730;uc001ydm.2;SERPINA5;chr14:95042730-95052730;
chr14:95202708-95238078	35370	chr14	95202708	95206226	chr14	95235097	95238078	3	1.14077e-11	No	Yes	uc001ydu.2;GSC;chr14:95231499-95241499;
chr14:95216053-95236702	20649	chr14	95216053	95220591	chr14	95233423	95236702	4	3.09182e-16	No	Yes	uc001ydu.2;GSC;chr14:95231499-95241499;
chr14:95591357-95625838	34481	chr14	95591357	95593972	chr14	95622050	95625838	4	1.00501e-14	No	Yes	uc001ydx.2;DICER1;chr14:95618759-95628759;uc001ydz.1;KIAA0928;chr14:95618759-95628759;uc001yea.1;KIAA0928;chr14:95618759-95628759;uc001yeb.1;KIAA0928;chr14:95618759-95628759;uc001yec.1;KIAA0928;chr14:95619347-95629347;uc010twt.1;FLJ45244;chr14:95619024-95629024;uc001yed.1;CR611440;chr14:95620022-95630022;
chr14:95901932-96002030	100098	chr14	95901932	95909934	chr14	95993916	96002030	12	1.35089e-37	No	Yes	uc001yek.2;SNHG10;chr14:95996209-96006209;uc001yel.2;SCARNA13;chr14:95996209-96006209;uc001yem.1;GLRX5;chr14:95996322-96006322;
chr14:96482796-96506336	23540	chr14	96482796	96485601	chr14	96503526	96506336	3	8.6383e-12	No	Yes	uc001yff.3;DKFZp761F2014;chr14:96500661-96510661;
chr14:96571480-96672874	101394	chr14	96571480	96574380	chr14	96670717	96672874	3	5.35736e-11	No	Yes	uc010avl.1;DKFZp686O088;chr14:96666134-96676134;uc010avm.1;BDKRB2;chr14:96666134-96676134;uc010twu.1;BDKRB2;chr14:96666134-96676134;uc001yfg.2;BDKRB2;chr14:96666134-96676134;
chr14:96792319-96832275	39956	chr14	96792319	96794064	chr14	96828525	96832275	3	1.12422e-11	No	Yes	uc001yfi.2;ATG2B;chr14:96824678-96834678;uc001yfk.2;CR597099;chr14:96824893-96834893;uc001yfj.3;C14orf129;chr14:96824862-96834862;
chr14:99373084-99741273	368189	chr14	99373084	99375615	chr14	99738519	99741273	4	2.30318e-14	No	Yes	uc001yga.2;BCL11B;chr14:99732822-99742822;uc001ygb.2;BCL11B;chr14:99732822-99742822;
chr14:99723377-99740169	16792	chr14	99723377	99725860	chr14	99737173	99740169	3	1.2042e-11	No	Yes	uc001yga.2;BCL11B;chr14:99732822-99742822;uc001ygb.2;BCL11B;chr14:99732822-99742822;
chr14:99986807-100074132	87325	chr14	99986807	99992724	chr14	100068641	100074132	6	2.58049e-19	No	Yes	uc010avr.2;CCDC85C;chr14:100065727-100075727;
chr14:100006693-100071732	65039	chr14	100006693	100009138	chr14	100069666	100071732	3	6.6303e-11	No	Yes	uc010avr.2;CCDC85C;chr14:100065727-100075727;
chr14:100019470-100072026	52556	chr14	100019470	100023220	chr14	100069265	100072026	4	5.13238e-14	No	Yes	uc010avr.2;CCDC85C;chr14:100065727-100075727;
chr14:100028369-100072101	43732	chr14	100028369	100031573	chr14	100068614	100072101	4	2.81835e-13	No	Yes	uc010avr.2;CCDC85C;chr14:100065727-100075727;
chr14:100210388-100261435	51047	chr14	100210388	100212407	chr14	100258592	100261435	3	8.58433e-11	No	Yes	uc001ygq.2;EML1;chr14:100254744-100264744;uc001ygr.2;EML1;chr14:100254744-100264744;uc001ygs.2;EML1;chr14:100254744-100264744;
chr14:100213079-100261514	48435	chr14	100213079	100217278	chr14	100258666	100261514	4	5.90613e-14	No	Yes	uc001ygq.2;EML1;chr14:100254744-100264744;uc001ygr.2;EML1;chr14:100254744-100264744;uc001ygs.2;EML1;chr14:100254744-100264744;
chr14:100213214-100439015	225801	chr14	100213214	100216248	chr14	100437009	100439015	3	5.69163e-10	No	Yes	uc001ygt.2;EVL;chr14:100433150-100443150;
chr14:100223467-100260500	37033	chr14	100223467	100225825	chr14	100258252	100260500	3	1.63591e-11	No	Yes	uc001ygq.2;EML1;chr14:100254744-100264744;uc001ygr.2;EML1;chr14:100254744-100264744;uc001ygs.2;EML1;chr14:100254744-100264744;
chr14:100407715-100439056	31341	chr14	100407715	100413700	chr14	100436390	100439056	7	3.5147e-23	No	Yes	uc001ygt.2;EVL;chr14:100433150-100443150;
chr14:100414075-100439665	25590	chr14	100414075	100417226	chr14	100437242	100439665	3	2.33091e-10	No	Yes	uc001ygt.2;EVL;chr14:100433150-100443150;
chr14:100463474-100480802	17328	chr14	100463474	100466352	chr14	100478060	100480802	4	5.38111e-16	No	Yes	uc001ygv.2;EVL;chr14:100480718-100490718;
chr14:100494472-100706008	211536	chr14	100494472	100500552	chr14	100701885	100706008	5	2.4503e-12	No	Yes	uc001ygy.1;YY1;chr14:100700101-100710101;
chr14:100495457-100527717	32260	chr14	100495457	100500006	chr14	100522865	100527717	7	4.21294e-21	No	Yes	uc001ygu.2;EVL;chr14:100526750-100536750;uc010avu.2;EVL;chr14:100526750-100536750;
chr14:100502088-100529414	27326	chr14	100502088	100504368	chr14	100524971	100529414	4	1.67232e-14	No	Yes	uc001ygu.2;EVL;chr14:100526750-100536750;uc010avu.2;EVL;chr14:100526750-100536750;
chr14:100711168-100772132	60964	chr14	100711168	100714186	chr14	100769913	100772132	3	3.16205e-10	No	Yes	uc001yha.2;SLC25A29;chr14:100767860-100777860;uc010twx.1;SLC25A29;chr14:100767860-100777860;uc010avw.2;SLC25A29;chr14:100767860-100777860;uc010twy.1;DM004693;chr14:100769195-100779195;
chr14:100735185-100775988	40803	chr14	100735185	100738214	chr14	100771142	100775988	4	9.3961e-13	No	Yes	uc001yha.2;SLC25A29;chr14:100767860-100777860;uc010twx.1;SLC25A29;chr14:100767860-100777860;uc010avw.2;SLC25A29;chr14:100767860-100777860;uc010twy.1;DM004693;chr14:100769195-100779195;
chr14:100904795-101120114	215319	chr14	100904795	100908172	chr14	101117484	101120114	3	1.52353e-12	No	Yes	uc001yhr.1;C14orf70;chr14:101118604-101128604;
chr14:102239410-102277678	38268	chr14	102239410	102241338	chr14	102275272	102277678	3	6.97315e-12	No	Yes	uc010txs.1;PPP2R5C;chr14:102271139-102281139;uc010txt.1;PPP2R5C;chr14:102271139-102281139;uc001ykn.2;PPP2R5C;chr14:102271139-102281139;uc001yko.2;PPP2R5C;chr14:102271139-102281139;uc001ykp.2;PPP2R5C;chr14:102271139-102281139;
chr14:102470881-102481857	10976	chr14	102470881	102473827	chr14	102478140	102481857	3	9.90456e-13	No	Yes	uc001ykt.1;KIAA0325;chr14:102476441-102486441;
chr14:103496806-103524992	28186	chr14	103496806	103499871	chr14	103521393	103524992	4	6.13483e-14	No	Yes	uc001ymi.1;CDC42BPB;chr14:103518742-103528742;
chr14:103548373-103572004	23631	chr14	103548373	103552537	chr14	103568415	103572004	3	1.79262e-11	No	Yes	uc001ymk.2;C14orf73;chr14:103561480-103571480;
chr14:104073010-104184420	111410	chr14	104073010	104076125	chr14	104181634	104184420	3	4.02281e-10	No	Yes	uc001yob.1;XRCC3;chr14:104174305-104184305;uc001yny.3;XRCC3;chr14:104176823-104186823;uc001ynx.3;XRCC3;chr14:104176823-104186823;uc001ynz.3;XRCC3;chr14:104176823-104186823;uc001yoa.3;XRCC3;chr14:104176823-104186823;uc001yoc.2;ZFYVE21;chr14:104177144-104187144;uc001yod.2;ZFYVE21;chr14:104177144-104187144;
chr14:104283950-104314888	30938	chr14	104283950	104288304	chr14	104311020	104314888	6	5.70266e-20	No	Yes	uc001yog.1;PPP1R13B;chr14:104308222-104318222;uc001yof.1;PPP1R13B;chr14:104308927-104318927;uc001yoh.1;AK057986;chr14:104309057-104319057;
chr14:105035401-105045385	9984	chr14	105035401	105038783	chr14	105042040	105045385	3	2.61177e-13	No	Yes	uc010tyh.1;C14orf180;chr14:105041055-105051055;uc001yow.1;C14orf180;chr14:105041055-105051055;
chr14:105115555-105156113	40558	chr14	105115555	105118681	chr14	105153005	105156113	4	2.37248e-13	No	Yes	uc001yoy.3;INF2;chr14:105150942-105160942;uc001ypb.2;INF2;chr14:105150942-105160942;uc001ypc.2;INF2;chr14:105150942-105160942;
chr14:105129603-105156510	26907	chr14	105129603	105135012	chr14	105153179	105156510	7	1.84695e-22	No	Yes	uc001yoy.3;INF2;chr14:105150942-105160942;uc001ypb.2;INF2;chr14:105150942-105160942;uc001ypc.2;INF2;chr14:105150942-105160942;
chr14:105130732-105151363	20631	chr14	105130732	105133864	chr14	105149630	105151363	3	3.24778e-12	No	Yes	uc001yoy.3;INF2;chr14:105150942-105160942;uc001ypb.2;INF2;chr14:105150942-105160942;uc001ypc.2;INF2;chr14:105150942-105160942;
chr14:105272275-105335339	63064	chr14	105272275	105274283	chr14	105332253	105335339	3	6.00793e-10	No	Yes	uc010axb.2;KIAA0284;chr14:105326653-105336653;uc001ypr.2;KIAA0284;chr14:105326653-105336653;
chr14:105362824-105452715	89891	chr14	105362824	105365816	chr14	105449816	105452715	3	6.36988e-11	No	Yes	uc001ypy.1;C14orf79;chr14:105447615-105457615;uc001ypz.1;GKT-ATA37;chr14:105447615-105457615;uc010tym.1;GKT-ATA37;chr14:105447615-105457615;
chr14:105397946-105436665	38719	chr14	105397946	105402026	chr14	105432075	105436665	6	2.68232e-18	No	Yes	uc001ypx.2;AHNAK2;chr14:105431820-105441820;
chr14:105427938-105436931	8993	chr14	105427938	105430706	chr14	105433411	105436931	5	2.50237e-18	No	Yes	uc001ypx.2;AHNAK2;chr14:105431820-105441820;
chr14:105555507-105649259	93752	chr14	105555507	105557532	chr14	105644874	105649259	4	5.09484e-14	No	Yes	uc010tyn.1;NUDT14;chr14:105642660-105652660;uc001yqi.2;UGPP;chr14:105642660-105652660;
chr14:105557317-105634761	77444	chr14	105557317	105562216	chr14	105628986	105634761	7	2.48396e-23	No	Yes	uc001yqg.2;JAG2;chr14:105630161-105640161;uc001yqh.2;JAG2;chr14:105630161-105640161;
chr14:105667669-105716210	48541	chr14	105667669	105672140	chr14	105712867	105716210	4	2.17308e-13	No	Yes	uc001yql.2;BRF1;chr14:105709222-105719222;uc001yqn.2;BRF;chr14:105709222-105719222;uc010axh.1;BRF;chr14:105709222-105719222;uc010axj.1;BRF;chr14:105709222-105719222;uc001yqo.2;BRF1;chr14:105710741-105720741;uc010tyq.1;BTBD6;chr14:105709878-105719878;
chr14:105754932-105769480	14548	chr14	105754932	105761514	chr14	105765400	105769480	11	1.26997e-37	No	Yes	uc001yqp.2;BRF1;chr14:105762329-105772329;uc010axg.1;BRF1;chr14:105762329-105772329;uc001yqr.2;BRF1;chr14:105762329-105772329;uc001yqs.2;PACS2;chr14:105762169-105772169;
chr14:105931323-105997139	65816	chr14	105931323	105933742	chr14	105993820	105997139	3	3.48573e-10	No	Yes	uc001yrp.1;TMEM121;chr14:105987952-105997952;uc001yrr.2;BC033241;chr14:105993191-106003191;
chr14:105977392-105994610	17218	chr14	105977392	105979930	chr14	105991783	105994610	3	2.37882e-11	No	Yes	uc001yrp.1;TMEM121;chr14:105987952-105997952;uc001yrr.2;BC033241;chr14:105993191-106003191;
chr15:33304810-33362023	57213	chr15	33304810	33307499	chr15	33358975	33362023	4	2.74239e-15	No	Yes	uc001zhf.3;FMN1;chr15:33355085-33365085;uc001zhg.2;FMN1;chr15:33355085-33365085;
chr15:33320032-33362232	42200	chr15	33320032	33323364	chr15	33359725	33362232	3	1.45107e-12	No	Yes	uc001zhf.3;FMN1;chr15:33355085-33365085;uc001zhg.2;FMN1;chr15:33355085-33365085;
chr15:39457550-39875383	417833	chr15	39457550	39462148	chr15	39871822	39875383	4	1.3176e-13	No	Yes	uc001zkh.2;THBS1;chr15:39868279-39878279;
chr15:39462621-39879521	416900	chr15	39462621	39468239	chr15	39870567	39879521	16	0	No	Yes	uc001zkh.2;THBS1;chr15:39868279-39878279;uc010bbi.2;THBS1;chr15:39875800-39885800;
chr15:39479647-39876378	396731	chr15	39479647	39485660	chr15	39872110	39876378	9	4.45353e-29	No	Yes	uc001zkh.2;THBS1;chr15:39868279-39878279;uc010bbi.2;THBS1;chr15:39875800-39885800;
chr15:39561763-39876512	314749	chr15	39561763	39569547	chr15	39871861	39876512	9	4.26355e-26	No	Yes	uc001zkh.2;THBS1;chr15:39868279-39878279;uc010bbi.2;THBS1;chr15:39875800-39885800;
chr15:39591035-39874622	283587	chr15	39591035	39593726	chr15	39871931	39874622	5	3.98218e-17	No	Yes	uc001zkh.2;THBS1;chr15:39868279-39878279;
chr15:39593979-39875272	281293	chr15	39593979	39597499	chr15	39871121	39875272	4	2.29349e-13	No	Yes	uc001zkh.2;THBS1;chr15:39868279-39878279;
chr15:39606611-39874967	268356	chr15	39606611	39609455	chr15	39872473	39874967	3	6.86016e-11	No	Yes	uc001zkh.2;THBS1;chr15:39868279-39878279;
chr15:39627903-39875615	247712	chr15	39627903	39630565	chr15	39872536	39875615	3	4.70166e-11	No	Yes	uc001zkh.2;THBS1;chr15:39868279-39878279;
chr15:39721051-39875310	154259	chr15	39721051	39725636	chr15	39870055	39875310	7	1.05256e-22	No	Yes	uc001zkh.2;THBS1;chr15:39868279-39878279;
chr15:39731790-39875275	143485	chr15	39731790	39738265	chr15	39871818	39875275	7	7.7256e-23	No	Yes	uc001zkh.2;THBS1;chr15:39868279-39878279;
chr15:39739658-39876303	136645	chr15	39739658	39743220	chr15	39872774	39876303	4	4.25511e-14	No	Yes	uc001zkh.2;THBS1;chr15:39868279-39878279;uc010bbi.2;THBS1;chr15:39875800-39885800;
chr15:39743414-39878085	134671	chr15	39743414	39749749	chr15	39871400	39878085	10	2.37e-32	No	Yes	uc001zkh.2;THBS1;chr15:39868279-39878279;uc010bbi.2;THBS1;chr15:39875800-39885800;
chr15:39825654-39875683	50029	chr15	39825654	39828035	chr15	39872582	39875683	3	5.11644e-11	No	Yes	uc001zkh.2;THBS1;chr15:39868279-39878279;
chr15:40343717-40397717	54000	chr15	40343717	40348357	chr15	40394391	40397717	7	1.27947e-25	No	Yes	uc001zkt.2;BMF;chr15:40393292-40403292;uc001zku.2;BMF;chr15:40393292-40403292;uc001zkv.2;BMF;chr15:40393639-40403639;uc001zkw.2;BMF;chr15:40396075-40406075;
chr15:41073204-41141155	67951	chr15	41073204	41083534	chr15	41133992	41141155	16	0	No	Yes	uc001znb.2;SPINT1;chr15:41131245-41141245;uc001zna.2;SPINT1;chr15:41131245-41141245;uc001znc.2;SPINT1;chr15:41131642-41141642;uc010ucs.1;SPINT1;chr15:41131687-41141687;
chr15:41076601-41123009	46408	chr15	41076601	41080762	chr15	41116674	41123009	6	3.55955e-23	No	Yes	uc001zmz.2;PPP1R14D;chr15:41115907-41125907;uc001zmy.2;PPP1R14D;chr15:41115907-41125907;
chr15:41076760-41167556	90796	chr15	41076760	41081645	chr15	41164224	41167556	4	4.25316e-13	No	Yes	uc001znd.2;RHOV;chr15:41161487-41171487;
chr15:41106243-41118366	12123	chr15	41106243	41108618	chr15	41116351	41118366	3	3.06262e-13	No	Yes	uc001zmz.2;PPP1R14D;chr15:41115907-41125907;uc001zmy.2;PPP1R14D;chr15:41115907-41125907;
chr15:41107457-41137941	30484	chr15	41107457	41109620	chr15	41136120	41137941	3	4.91842e-12	No	Yes	uc001znb.2;SPINT1;chr15:41131245-41141245;uc001zna.2;SPINT1;chr15:41131245-41141245;uc001znc.2;SPINT1;chr15:41131642-41141642;uc010ucs.1;SPINT1;chr15:41131687-41141687;
chr15:41148133-41175193	27060	chr15	41148133	41159834	chr15	41169228	41175193	12	4.2039e-45	No	Yes	uc001znd.2;RHOV;chr15:41161487-41171487;
chr15:42237041-42266549	29508	chr15	42237041	42240876	chr15	42263430	42266549	3	2.65678e-12	No	Yes	uc001zot.2;EHD4;chr15:42259755-42269755;uc001zou.2;EHD4;chr15:42259755-42269755;
chr15:42552126-42570874	18748	chr15	42552126	42554806	chr15	42568266	42570874	3	1.66648e-15	No	Yes	uc010udd.1;TMEM87A;chr15:42560755-42570755;uc001zpf.3;TMEM87A;chr15:42560755-42570755;uc010bcu.1;TMEM87A;chr15:42560755-42570755;uc001zpg.2;TMEM87A;chr15:42560755-42570755;uc001zph.2;GANC;chr15:42560855-42570855;uc010ude.1;GANC;chr15:42561365-42571365;uc001zpi.2;GANC;chr15:42561365-42571365;uc001zpj.1;GANC;chr15:42563545-42573545;
chr15:45707965-45726088	18123	chr15	45707965	45711032	chr15	45722401	45726088	3	7.41423e-12	No	Yes	uc001zvg.2;C15orf48;chr15:45717762-45727762;uc001zvh.2;C15orf48;chr15:45717762-45727762;
chr15:45859293-45879431	20138	chr15	45859293	45861459	chr15	45876770	45879431	3	5.87055e-13	No	Yes	uc001zvq.2;PLDN;chr15:45874416-45884416;uc001zvr.2;PLDN;chr15:45874416-45884416;uc001zvs.2;PLDN;chr15:45874788-45884788;
chr15:48928215-48939881	11666	chr15	48928215	48932176	chr15	48936806	48939881	3	6.83888e-13	No	Yes	uc001zwx.1;FBN1;chr15:48932918-48942918;
chr15:49157315-49257983	100668	chr15	49157315	49161689	chr15	49254673	49257983	4	1.64037e-16	No	Yes	uc001zxb.1;SHC4;chr15:49250641-49260641;
chr15:49857690-49914714	57024	chr15	49857690	49860916	chr15	49911493	49914714	3	5.3264e-10	No	Yes	uc001zxl.2;C15orf33;chr15:49908118-49918118;uc001zxm.2;C15orf33;chr15:49908051-49918051;uc001zxp.3;DTWD1;chr15:49908225-49918225;uc001zxq.2;DTWD1;chr15:49908225-49918225;uc001zxs.2;DTWD1;chr15:49908225-49918225;uc001zxr.2;DTWD1;chr15:49908225-49918225;uc001zxo.2;DTWD1;chr15:49908278-49918278;
chr15:50314308-50649428	335120	chr15	50314308	50317244	chr15	50645830	50649428	3	1.32835e-07	No	Yes	uc001zya.2;GABPB1;chr15:50642605-50652605;uc001zyb.2;GABPB1;chr15:50642605-50652605;uc010ufg.1;GABPB1;chr15:50642605-50652605;uc001zyc.2;GABPB1;chr15:50642605-50652605;uc001zyd.2;GABPB1;chr15:50642605-50652605;uc001zye.2;GABPB1;chr15:50642605-50652605;uc001zyf.2;GABPB1;chr15:50642605-50652605;uc001zyg.2;FLJ10038;chr15:50642076-50652076;uc001zyh.3;LOC100129387;chr15:50641370-50651370;uc001zyi.2;BX…
chr15:50435789-50476135	40346	chr15	50435789	50439310	chr15	50472898	50476135	3	2.88847e-10	No	Yes	uc001zxw.2;SLC27A2;chr15:50469392-50479392;uc010bes.2;SLC27A2;chr15:50469392-50479392;
chr15:50442015-50648814	206799	chr15	50442015	50445819	chr15	50646242	50648814	3	9.40487e-08	No	Yes	uc001zya.2;GABPB1;chr15:50642605-50652605;uc001zyb.2;GABPB1;chr15:50642605-50652605;uc010ufg.1;GABPB1;chr15:50642605-50652605;uc001zyc.2;GABPB1;chr15:50642605-50652605;uc001zyd.2;GABPB1;chr15:50642605-50652605;uc001zye.2;GABPB1;chr15:50642605-50652605;uc001zyf.2;GABPB1;chr15:50642605-50652605;uc001zyg.2;FLJ10038;chr15:50642076-50652076;uc001zyh.3;LOC100129387;chr15:50641370-50651370;uc001zyi.2;BX…
chr15:50458011-50647802	189791	chr15	50458011	50460195	chr15	50646104	50647802	3	3.85471e-08	No	Yes	uc001zya.2;GABPB1;chr15:50642605-50652605;uc001zyb.2;GABPB1;chr15:50642605-50652605;uc010ufg.1;GABPB1;chr15:50642605-50652605;uc001zyc.2;GABPB1;chr15:50642605-50652605;uc001zyd.2;GABPB1;chr15:50642605-50652605;uc001zye.2;GABPB1;chr15:50642605-50652605;uc001zyf.2;GABPB1;chr15:50642605-50652605;uc001zyg.2;FLJ10038;chr15:50642076-50652076;uc001zyh.3;LOC100129387;chr15:50641370-50651370;uc001zyi.2;BX…
chr15:50458627-50472298	13671	chr15	50458627	50460715	chr15	50469369	50472298	3	2.6153e-12	No	Yes	uc001zxw.2;SLC27A2;chr15:50469392-50479392;uc010bes.2;SLC27A2;chr15:50469392-50479392;
chr15:50501377-50648632	147255	chr15	50501377	50505318	chr15	50644153	50648632	4	1.47717e-09	No	Yes	uc001zya.2;GABPB1;chr15:50642605-50652605;uc001zyb.2;GABPB1;chr15:50642605-50652605;uc010ufg.1;GABPB1;chr15:50642605-50652605;uc001zyc.2;GABPB1;chr15:50642605-50652605;uc001zyd.2;GABPB1;chr15:50642605-50652605;uc001zye.2;GABPB1;chr15:50642605-50652605;uc001zyf.2;GABPB1;chr15:50642605-50652605;uc001zyg.2;FLJ10038;chr15:50642076-50652076;uc001zyh.3;LOC100129387;chr15:50641370-50651370;uc001zyi.2;BX…
chr15:50517837-50647800	129963	chr15	50517837	50520977	chr15	50646044	50647800	3	8.09814e-08	No	Yes	uc001zya.2;GABPB1;chr15:50642605-50652605;uc001zyb.2;GABPB1;chr15:50642605-50652605;uc010ufg.1;GABPB1;chr15:50642605-50652605;uc001zyc.2;GABPB1;chr15:50642605-50652605;uc001zyd.2;GABPB1;chr15:50642605-50652605;uc001zye.2;GABPB1;chr15:50642605-50652605;uc001zyf.2;GABPB1;chr15:50642605-50652605;uc001zyg.2;FLJ10038;chr15:50642076-50652076;uc001zyh.3;LOC100129387;chr15:50641370-50651370;uc001zyi.2;BX…
chr15:50533658-50542170	8512	chr15	50533658	50538848	chr15	50537411	50542170	9	5.55615e-32	No	Yes	uc001zxy.2;HDC;chr15:50540502-50550502;
chr15:51000299-51058817	58518	chr15	51000299	51003362	chr15	51056520	51058817	3	1.19652e-09	No	Yes	uc001zyv.2;SPPL2A;chr15:51052910-51062910;
chr15:51033137-51059356	26219	chr15	51033137	51038584	chr15	51056604	51059356	6	8.0811e-19	No	Yes	uc001zyv.2;SPPL2A;chr15:51052910-51062910;
chr15:51657511-51668182	10671	chr15	51657511	51664032	chr15	51661986	51668182	14	0	No	Yes	uc002abb.2;GLDN;chr15:51664454-51674454;
chr15:51659859-51672353	12494	chr15	51659859	51663874	chr15	51668414	51672353	4	3.66011e-14	No	Yes	uc002abb.2;GLDN;chr15:51664454-51674454;
chr15:51827562-51915889	88327	chr15	51827562	51833709	chr15	51913512	51915889	5	8.05085e-15	No	Yes	uc002abf.2;DMXL2;chr15:51909967-51919967;uc010ufy.1;DMXL2;chr15:51909967-51919967;uc010bfa.2;DMXL2;chr15:51909967-51919967;uc002abg.2;DMXL2;chr15:51909967-51919967;
chr15:51869903-51916581	46678	chr15	51869903	51873924	chr15	51913633	51916581	3	3.32851e-09	No	Yes	uc002abf.2;DMXL2;chr15:51909967-51919967;uc010ufy.1;DMXL2;chr15:51909967-51919967;uc010bfa.2;DMXL2;chr15:51909967-51919967;uc002abg.2;DMXL2;chr15:51909967-51919967;
chr15:52087804-52123482	35678	chr15	52087804	52093803	chr15	52117139	52123482	14	7.63988e-42	No	Yes	uc002abm.2;TMOD3;chr15:52116888-52126888;
chr15:52244109-52265545	21436	chr15	52244109	52249001	chr15	52262072	52265545	5	1.85037e-14	No	Yes	uc002abo.2;LEO1;chr15:52258958-52268958;uc010bfd.2;LEO1;chr15:52258958-52268958;
chr15:52279055-52313180	34125	chr15	52279055	52281175	chr15	52310186	52313180	3	2.43144e-09	No	Yes	uc002abp.2;MAPK6;chr15:52306410-52316410;
chr15:52388531-52403881	15350	chr15	52388531	52391551	chr15	52401411	52403881	3	1.54024e-12	No	Yes	uc002abq.2;BCL2L10;chr15:52399972-52409972;
chr15:52536664-52590204	53540	chr15	52536664	52559220	chr15	52576974	52590204	72	0	No	Yes	uc010bff.2;MYO5C;chr15:52582970-52592970;uc010uga.1;MYO5C;chr15:52582970-52592970;uc010ugb.1;MYO5C;chr15:52582970-52592970;uc010ugc.1;MYO5C;chr15:52582970-52592970;
chr15:52579768-52821872	242104	chr15	52579768	52582788	chr15	52819244	52821872	3	2.16027e-07	No	Yes	uc002aby.2;MYO5A;chr15:52816247-52826247;uc002abx.3;MYO5A;chr15:52816247-52826247;uc010uge.1;MYO5A;chr15:52816247-52826247;
chr15:52776257-52822137	45880	chr15	52776257	52779686	chr15	52818721	52822137	4	1.24338e-13	No	Yes	uc002aby.2;MYO5A;chr15:52816247-52826247;uc002abx.3;MYO5A;chr15:52816247-52826247;uc010uge.1;MYO5A;chr15:52816247-52826247;
chr15:52929482-52940683	11201	chr15	52929482	52933252	chr15	52937332	52940683	4	1.65818e-15	No	Yes	uc010ugf.1;KIAA1370;chr15:52939237-52949237;
chr15:52932870-52973908	41038	chr15	52932870	52937961	chr15	52968619	52973908	7	1.05791e-19	No	Yes	uc002acg.3;KIAA1370;chr15:52965820-52975820;uc002ach.3;KIAA1370;chr15:52965831-52975831;uc010bfg.1;KIAA1370;chr15:52965953-52975953;
chr15:53072465-53083147	10682	chr15	53072465	53075963	chr15	53080706	53083147	3	8.55614e-12	No	Yes	uc002aci.1;ONECUT1;chr15:53077209-53087209;
chr15:55869964-55881515	11551	chr15	55869964	55873687	chr15	55878081	55881515	3	4.40675e-13	No	Yes	uc010bfl.1;PYGO1;chr15:55875137-55885137;uc002adf.1;PYGO1;chr15:55876050-55886050;
chr15:55984277-56036861	52584	chr15	55984277	55986999	chr15	56034063	56036861	3	1.09613e-11	No	Yes	uc002adg.2;PRTG;chr15:56030177-56040177;
chr15:56384379-56537262	152883	chr15	56384379	56386985	chr15	56534620	56537262	4	2.69415e-15	No	Yes	uc010bfn.2;RFX7;chr15:56530483-56540483;
chr15:56483194-56539303	56109	chr15	56483194	56486063	chr15	56535825	56539303	3	6.96966e-11	No	Yes	uc010bfn.2;RFX7;chr15:56530483-56540483;
chr15:56648882-56659140	10258	chr15	56648882	56652166	chr15	56656839	56659140	3	1.6363e-13	No	Yes	uc002ado.1;TEX9;chr15:56652643-56662643;uc002adp.2;TEX9;chr15:56652643-56662643;uc010ugl.1;TEX9;chr15:56652643-56662643;uc002adq.1;TEX9;chr15:56652644-56662644;
chr15:56954012-56976021	22009	chr15	56954012	56957476	chr15	56973562	56976021	3	2.15822e-14	No	Yes	uc010bfp.2;KIAA1584;chr15:56969675-56979675;
chr15:59575465-59668051	92586	chr15	59575465	59580308	chr15	59663401	59668051	6	1.26853e-21	No	Yes	uc002aga.2;MYO1E;chr15:59660071-59670071;
chr15:60650904-60688569	37665	chr15	60650904	60653635	chr15	60685413	60688569	3	3.27483e-11	No	Yes	uc002agn.2;ANXA2;chr15:60685185-60695185;uc002agk.2;ANXA2;chr15:60685185-60695185;uc002agl.2;ANXA2;chr15:60685185-60695185;uc002agm.2;ANXA2;chr15:60685185-60695185;uc010uhd.1;ANXA2;chr15:60685185-60695185;uc010bgj.2;ANXA2;chr15:60685185-60695185;
chr15:63073231-63336254	263023	chr15	63073231	63078545	chr15	63333219	63336254	9	8.14679e-31	No	Yes	uc002alg.2;TPM1;chr15:63329837-63339837;uc002alh.2;TPM1;chr15:63329837-63339837;uc010bgn.2;TPM1;chr15:63329837-63339837;uc002ali.2;TPM1;chr15:63329837-63339837;uc002alj.2;TPM1;chr15:63329837-63339837;uc002alk.2;TPM1;chr15:63329837-63339837;uc002all.2;TPM1;chr15:63329837-63339837;uc002alm.2;TPM1;chr15:63329837-63339837;uc010uie.1;TPM1;chr15:63330008-63340008;uc002alp.2;TPM1;chr15:63330008-63340008…
chr15:63074200-63344774	270574	chr15	63074200	63077871	chr15	63340865	63344774	5	2.68304e-17	No	Yes	uc002alq.1;AX747619;chr15:63336586-63346586;uc010bgo.2;AK310237;chr15:63336447-63346447;uc010uif.1;TPM1;chr15:63335635-63345635;uc002alr.2;TPM1;chr15:63335635-63345635;uc002als.2;TPM1;chr15:63335635-63345635;uc010uig.1;TPM1;chr15:63335635-63345635;uc002alt.2;TPM1;chr15:63335635-63345635;uc010bgp.2;TPM1;chr15:63335635-63345635;
chr15:63074299-63126843	52544	chr15	63074299	63076211	chr15	63123755	63126843	4	1.02725e-15	No	Yes	uc002ale.1;AK125516;chr15:63122596-63132596;
chr15:63143741-63336766	193025	chr15	63143741	63149264	chr15	63330732	63336766	5	2.16552e-16	No	Yes	uc002alg.2;TPM1;chr15:63329837-63339837;uc002alh.2;TPM1;chr15:63329837-63339837;uc010bgn.2;TPM1;chr15:63329837-63339837;uc002ali.2;TPM1;chr15:63329837-63339837;uc002alj.2;TPM1;chr15:63329837-63339837;uc002alk.2;TPM1;chr15:63329837-63339837;uc002all.2;TPM1;chr15:63329837-63339837;uc002alm.2;TPM1;chr15:63329837-63339837;uc010uie.1;TPM1;chr15:63330008-63340008;uc002alp.2;TPM1;chr15:63330008-63340008…
chr15:63186585-63340579	153994	chr15	63186585	63190931	chr15	63334340	63340579	11	3.89171e-32	No	Yes	uc002alg.2;TPM1;chr15:63329837-63339837;uc002alh.2;TPM1;chr15:63329837-63339837;uc010bgn.2;TPM1;chr15:63329837-63339837;uc002ali.2;TPM1;chr15:63329837-63339837;uc002alj.2;TPM1;chr15:63329837-63339837;uc002alk.2;TPM1;chr15:63329837-63339837;uc002all.2;TPM1;chr15:63329837-63339837;uc002alm.2;TPM1;chr15:63329837-63339837;uc010uie.1;TPM1;chr15:63330008-63340008;uc002alp.2;TPM1;chr15:63330008-63340008…
chr15:63186613-63334250	147637	chr15	63186613	63189624	chr15	63331084	63334250	4	1.56143e-13	No	Yes	uc002alg.2;TPM1;chr15:63329837-63339837;uc002alh.2;TPM1;chr15:63329837-63339837;uc010bgn.2;TPM1;chr15:63329837-63339837;uc002ali.2;TPM1;chr15:63329837-63339837;uc002alj.2;TPM1;chr15:63329837-63339837;uc002alk.2;TPM1;chr15:63329837-63339837;uc002all.2;TPM1;chr15:63329837-63339837;uc002alm.2;TPM1;chr15:63329837-63339837;uc010uie.1;TPM1;chr15:63330008-63340008;uc002alp.2;TPM1;chr15:63330008-63340008;
chr15:63191112-63336628	145516	chr15	63191112	63193827	chr15	63334550	63336628	3	1.15814e-10	No	Yes	uc002alg.2;TPM1;chr15:63329837-63339837;uc002alh.2;TPM1;chr15:63329837-63339837;uc010bgn.2;TPM1;chr15:63329837-63339837;uc002ali.2;TPM1;chr15:63329837-63339837;uc002alj.2;TPM1;chr15:63329837-63339837;uc002alk.2;TPM1;chr15:63329837-63339837;uc002all.2;TPM1;chr15:63329837-63339837;uc002alm.2;TPM1;chr15:63329837-63339837;uc010uie.1;TPM1;chr15:63330008-63340008;uc002alp.2;TPM1;chr15:63330008-63340008…
chr15:63240013-63337705	97692	chr15	63240013	63243409	chr15	63334920	63337705	3	1.93874e-11	No	Yes	uc002alg.2;TPM1;chr15:63329837-63339837;uc002alh.2;TPM1;chr15:63329837-63339837;uc010bgn.2;TPM1;chr15:63329837-63339837;uc002ali.2;TPM1;chr15:63329837-63339837;uc002alj.2;TPM1;chr15:63329837-63339837;uc002alk.2;TPM1;chr15:63329837-63339837;uc002all.2;TPM1;chr15:63329837-63339837;uc002alm.2;TPM1;chr15:63329837-63339837;uc010uie.1;TPM1;chr15:63330008-63340008;uc002alp.2;TPM1;chr15:63330008-63340008…
chr15:66112149-66163706	51557	chr15	66112149	66116117	chr15	66161690	66163706	3	1.69289e-11	No	Yes	uc010ujk.1;RAB11A;chr15:66156795-66166795;uc002apk.2;RAB11A;chr15:66156795-66166795;
chr15:66123945-66163268	39323	chr15	66123945	66127952	chr15	66160473	66163268	4	3.91888e-13	No	Yes	uc010ujk.1;RAB11A;chr15:66156795-66166795;uc002apk.2;RAB11A;chr15:66156795-66166795;
chr15:66938077-66995665	57588	chr15	66938077	66943030	chr15	66993636	66995665	4	2.11354e-14	No	Yes	uc010bhx.2;SMAD6;chr15:66989673-66999673;uc002aqf.2;SMAD6;chr15:66989673-66999673;
chr15:66947287-66996197	48910	chr15	66947287	66949850	chr15	66994003	66996197	3	9.30385e-11	No	Yes	uc010bhx.2;SMAD6;chr15:66989673-66999673;uc002aqf.2;SMAD6;chr15:66989673-66999673;uc002aqg.2;SMAD6;chr15:66995929-67005929;
chr15:67238641-67360035	121394	chr15	67238641	67241758	chr15	67357142	67360035	3	1.69614e-10	No	Yes	uc002aqj.2;SMAD3;chr15:67353194-67363194;
chr15:67439208-67547728	108520	chr15	67439208	67442389	chr15	67545454	67547728	3	6.81231e-09	No	Yes	uc002aql.2;DKFZp566A0646;chr15:67542013-67552013;uc002aqk.3;AAGAB;chr15:67542074-67552074;uc010uju.1;AAGAB;chr15:67542533-67552533;uc002aqm.2;IQCH;chr15:67542187-67552187;uc010ujv.1;IQCH;chr15:67542187-67552187;uc002aqn.1;IQCH;chr15:67542187-67552187;uc002aqo.1;IQCH;chr15:67542187-67552187;uc002aqp.1;IQCH;chr15:67542187-67552187;uc002aqq.1;IQCH;chr15:67542187-67552187;
chr15:71033849-71056643	22794	chr15	71033849	71037023	chr15	71054764	71056643	3	2.82668e-11	No	Yes	uc002asr.2;UACA;chr15:71050850-71060850;uc010uke.1;UACA;chr15:71050850-71060850;
chr15:71045893-71057695	11802	chr15	71045893	71049014	chr15	71054510	71057695	5	5.26e-19	No	Yes	uc002asr.2;UACA;chr15:71050850-71060850;uc010uke.1;UACA;chr15:71050850-71060850;
chr15:71266439-71409261	142822	chr15	71266439	71270083	chr15	71406118	71409261	3	4.57343e-09	No	Yes	uc002ata.2;CT62;chr15:71402839-71412839;
chr15:71301070-71410676	109606	chr15	71301070	71311200	chr15	71403079	71410676	30	0	No	Yes	uc002ata.2;CT62;chr15:71402839-71412839;
chr15:71342314-71409011	66697	chr15	71342314	71345290	chr15	71405969	71409011	3	2.1867e-09	No	Yes	uc002ata.2;CT62;chr15:71402839-71412839;
chr15:71359379-71412864	53485	chr15	71359379	71366437	chr15	71402477	71412864	26	0	No	Yes	uc002ata.2;CT62;chr15:71402839-71412839;
chr15:71421019-71429887	8868	chr15	71421019	71427567	chr15	71425198	71429887	8	7.74001e-28	No	Yes	uc002atb.1;THSD4;chr15:71428787-71438787;
chr15:72475452-72523959	48507	chr15	72475452	72478834	chr15	72520641	72523959	4	7.61321e-12	No	Yes	uc010bit.1;PKM2;chr15:72517063-72527063;uc010uki.1;PKM2;chr15:72518512-72528512;uc002atv.1;PKM2;chr15:72518512-72528512;uc002atx.1;PKM2;chr15:72518684-72528684;uc002atw.1;PKM2;chr15:72518684-72528684;uc002aty.1;PKM2;chr15:72518684-72528684;uc010ukj.1;PKM2;chr15:72518684-72528684;uc010ukk.1;PKM2;chr15:72518684-72528684;uc010biu.1;PKM2;chr15:72516017-72526017;uc002atz.1;PKM2;chr15:72518684-72528684;
chr15:72648214-72767874	119660	chr15	72648214	72651492	chr15	72765050	72767874	3	2.64697e-09	No	Yes	uc002aut.3;ARIH1;chr15:72761666-72771666;
chr15:73262265-73345241	82976	chr15	73262265	73265047	chr15	73342979	73345241	3	3.83374e-11	No	Yes	uc002avm.3;NEO1;chr15:73339874-73349874;uc010ukx.1;NEO1;chr15:73339874-73349874;uc010uky.1;NEO1;chr15:73339874-73349874;uc010ukz.1;NEO1;chr15:73339874-73349874;
chr15:73330729-73346479	15750	chr15	73330729	73333249	chr15	73343041	73346479	3	1.87012e-11	No	Yes	uc002avm.3;NEO1;chr15:73339874-73349874;uc010ukx.1;NEO1;chr15:73339874-73349874;uc010uky.1;NEO1;chr15:73339874-73349874;uc010ukz.1;NEO1;chr15:73339874-73349874;
chr15:73861210-73926880	65670	chr15	73861210	73864770	chr15	73923964	73926880	3	4.86782e-10	No	Yes	uc002avs.2;NPTN;chr15:73920753-73930753;uc010bjc.2;NPTN;chr15:73920753-73930753;uc002avt.2;NPTN;chr15:73920753-73930753;uc002avr.2;NPTN;chr15:73920753-73930753;uc010ula.1;DKFZp566H1924;chr15:73920753-73930753;
chr15:73877093-73929327	52234	chr15	73877093	73883736	chr15	73923951	73929327	8	1.32045e-26	No	Yes	uc002avs.2;NPTN;chr15:73920753-73930753;uc010bjc.2;NPTN;chr15:73920753-73930753;uc002avt.2;NPTN;chr15:73920753-73930753;uc002avr.2;NPTN;chr15:73920753-73930753;uc010ula.1;DKFZp566H1924;chr15:73920753-73930753;
chr15:73883878-73926967	43089	chr15	73883878	73886307	chr15	73924446	73926967	3	1.02633e-10	No	Yes	uc002avs.2;NPTN;chr15:73920753-73930753;uc010bjc.2;NPTN;chr15:73920753-73930753;uc002avt.2;NPTN;chr15:73920753-73930753;uc002avr.2;NPTN;chr15:73920753-73930753;uc010ula.1;DKFZp566H1924;chr15:73920753-73930753;
chr15:73891083-73977983	86900	chr15	73891083	73895912	chr15	73975299	73977983	6	1.92366e-20	No	Yes	uc010bjd.1;CD276;chr15:73971621-73981621;uc002avu.1;CD276;chr15:73971621-73981621;uc002avv.1;CD276;chr15:73971621-73981621;uc002avw.1;CD276;chr15:73971621-73981621;uc010ulb.1;B7-H3;chr15:73971621-73981621;
chr15:73899288-73923748	24460	chr15	73899288	73902117	chr15	73920914	73923748	3	4.47749e-12	No	Yes	uc002avs.2;NPTN;chr15:73920753-73930753;uc010bjc.2;NPTN;chr15:73920753-73930753;uc002avt.2;NPTN;chr15:73920753-73930753;uc002avr.2;NPTN;chr15:73920753-73930753;uc010ula.1;DKFZp566H1924;chr15:73920753-73930753;
chr15:74269620-74280849	11229	chr15	74269620	74272982	chr15	74277388	74280849	3	1.60624e-12	No	Yes	uc002awe.2;STOML1;chr15:74279635-74289635;uc002awf.2;STOML1;chr15:74279635-74289635;uc010bje.2;STOML1;chr15:74279635-74289635;uc010uld.1;UNC24;chr15:74279635-74289635;uc002awh.2;STOML1;chr15:74279635-74289635;uc002awg.2;STOML1;chr15:74279635-74289635;
chr15:74301606-74313632	12026	chr15	74301606	74304928	chr15	74311289	74313632	4	1.106e-19	No	Yes	uc002awx.2;PML;chr15:74310168-74320168;uc002awy.2;PML;chr15:74312197-74322197;
chr15:74514536-74529692	15156	chr15	74514536	74518272	chr15	74526056	74529692	3	3.34811e-13	No	Yes	uc002axo.2;CCDC33;chr15:74523666-74533666;
chr15:74840503-74913581	73078	chr15	74840503	74842245	chr15	74910348	74913581	3	1.36143e-12	No	Yes	uc010ulm.1;CLK3;chr15:74902334-74912334;uc010uln.1;CLK3;chr15:74902334-74912334;uc002ayj.3;CLK3;chr15:74903245-74913245;uc002ayk.3;CLK3;chr15:74906537-74916537;uc002ayl.3;CLK3;chr15:74910960-74920960;
chr15:74856700-74880128	23428	chr15	74856700	74859617	chr15	74876884	74880128	3	1.94017e-13	No	Yes	uc010bjs.1;ARID3B;chr15:74878491-74888491;
chr15:74927868-75076958	149090	chr15	74927868	74930219	chr15	75074349	75076958	3	3.81735e-11	No	Yes	uc010bka.2;CSK;chr15:75069424-75079424;uc010bkb.1;CSK;chr15:75069424-75079424;uc002ays.2;CSK;chr15:75069424-75079424;
chr15:75081235-75111318	30083	chr15	75081235	75085402	chr15	75108223	75111318	4	3.30522e-14	No	Yes	uc010bkd.2;LMAN1L;chr15:75100152-75110152;uc010ulo.1;LMAN1L;chr15:75100152-75110152;uc002ayt.1;LMAN1L;chr15:75100193-75110193;uc010bke.1;LMAN1L;chr15:75100193-75110193;
chr15:75126658-75185005	58347	chr15	75126658	75129435	chr15	75182077	75185005	3	8.84379e-10	No	Yes	uc010ulv.1;MPI;chr15:75177409-75187409;uc010ulw.1;MPI;chr15:75177409-75187409;uc002azc.1;MPI;chr15:75177409-75187409;uc002azd.1;MPI;chr15:75177409-75187409;uc010ulx.1;MPI;chr15:75177409-75187409;uc002aze.1;MPI;chr15:75177409-75187409;
chr15:75156545-75185437	28892	chr15	75156545	75159476	chr15	75183223	75185437	3	9.99747e-12	No	Yes	uc010ulv.1;MPI;chr15:75177409-75187409;uc010ulw.1;MPI;chr15:75177409-75187409;uc002azc.1;MPI;chr15:75177409-75187409;uc002azd.1;MPI;chr15:75177409-75187409;uc010ulx.1;MPI;chr15:75177409-75187409;uc002aze.1;MPI;chr15:75177409-75187409;
chr15:75396689-75495578	98889	chr15	75396689	75398757	chr15	75493446	75495578	3	1.28122e-10	No	Yes	uc002azp.3;C15orf39;chr15:75486232-75496232;uc002azq.3;C15orf39;chr15:75489220-75499220;uc002azr.3;FP6578;chr15:75495021-75505021;
chr15:75447167-75495172	48005	chr15	75447167	75449723	chr15	75491839	75495172	3	7.64517e-11	No	Yes	uc002azp.3;C15orf39;chr15:75486232-75496232;uc002azq.3;C15orf39;chr15:75489220-75499220;uc002azr.3;FP6578;chr15:75495021-75505021;
chr15:75651898-75872338	220440	chr15	75651898	75654769	chr15	75870111	75872338	3	8.43919e-10	No	Yes	uc002bal.2;PTPN9;chr15:75866625-75876625;
chr15:75673195-75745869	72674	chr15	75673195	75675877	chr15	75743620	75745869	3	3.44665e-11	No	Yes	uc002bai.2;SIN3A;chr15:75738926-75748926;uc002baj.2;SIN3A;chr15:75739087-75749087;uc010uml.1;SIN3A;chr15:75743124-75753124;uc002bak.3;SIN3A;chr15:75739087-75749087;
chr15:75707688-75746809	39121	chr15	75707688	75712110	chr15	75743127	75746809	4	1.56555e-13	No	Yes	uc002bai.2;SIN3A;chr15:75738926-75748926;uc002baj.2;SIN3A;chr15:75739087-75749087;uc010uml.1;SIN3A;chr15:75743124-75753124;uc002bak.3;SIN3A;chr15:75739087-75749087;
chr15:77642843-77713266	70423	chr15	77642843	77646097	chr15	77710944	77713266	3	1.35345e-11	No	Yes	uc002bcq.1;HMG20A;chr15:77708242-77718242;uc002bcr.2;HMG20A;chr15:77708242-77718242;uc002bcs.2;HMG20A;chr15:77708242-77718242;
chr15:78275999-78284408	8409	chr15	78275999	78279475	chr15	78281569	78284408	3	4.60754e-15	No	Yes	uc010umr.1;LOC91450;chr15:78281567-78291567;
chr15:78403982-78533698	129716	chr15	78403982	78406410	chr15	78531457	78533698	3	1.11667e-14	No	Yes	uc002bdh.2;ACSBG1;chr15:78521899-78531899;uc010umw.1;ACSBG1;chr15:78521899-78531899;uc010umx.1;KIAA0631;chr15:78521899-78531899;uc010umy.1;KIAA0631;chr15:78521899-78531899;
chr15:78535982-78557392	21410	chr15	78535982	78537799	chr15	78554735	78557392	3	5.74695e-12	No	Yes	uc002bdi.2;DNAJA4;chr15:78551486-78561486;uc002bdj.1;DNAJA4;chr15:78551988-78561988;uc002bdk.2;DNAJA4;chr15:78553559-78563559;uc002bdl.2;DNAJA4;chr15:78557358-78567358;
chr15:79316700-79604818	288118	chr15	79316700	79320538	chr15	79602393	79604818	3	1.56838e-11	No	Yes	uc002beu.2;TMED3;chr15:79598490-79608490;uc002bev.2;UNQ535;chr15:79598490-79608490;uc010unj.1;TMED3;chr15:79598490-79608490;
chr15:80284507-80355325	70818	chr15	80284507	80287703	chr15	80351647	80355325	3	1.70786e-10	No	Yes	uc002bfe.1;ZFAND6;chr15:80347020-80357020;uc002bff.1;ZFAND6;chr15:80347020-80357020;uc002bfg.1;ZFAND6;chr15:80347020-80357020;
chr15:80683266-80691746	8480	chr15	80683266	80686355	chr15	80688806	80691746	4	4.68862e-17	No	Yes	uc002bfq.2;ARNT2;chr15:80691691-80701691;uc002bfr.2;ARNT2;chr15:80691691-80701691;
chr15:80889922-80988866	98944	chr15	80889922	80893065	chr15	80986217	80988866	4	6.1156e-14	No	Yes	uc002bfu.2;FAM108C1;chr15:80982651-80992651;uc002bft.2;FAM108C1;chr15:80982651-80992651;
chr15:80907549-80988899	81350	chr15	80907549	80910280	chr15	80987245	80988899	3	4.43706e-11	No	Yes	uc002bfu.2;FAM108C1;chr15:80982651-80992651;uc002bft.2;FAM108C1;chr15:80982651-80992651;
chr15:80950433-80989510	39077	chr15	80950433	80955271	chr15	80986088	80989510	8	4.79806e-26	No	Yes	uc002bfu.2;FAM108C1;chr15:80982651-80992651;uc002bft.2;FAM108C1;chr15:80982651-80992651;
chr15:80961447-80988986	27539	chr15	80961447	80965022	chr15	80987019	80988986	4	1.24582e-13	No	Yes	uc002bfu.2;FAM108C1;chr15:80982651-80992651;uc002bft.2;FAM108C1;chr15:80982651-80992651;
chr15:80971061-81071548	100487	chr15	80971061	80974116	chr15	81068049	81071548	4	1.38173e-14	No	Yes	uc002bfw.1;KIAA1199;chr15:81066711-81076711;uc010unn.1;KIAA1199;chr15:81066711-81076711;
chr15:81246449-81284034	37585	chr15	81246449	81249508	chr15	81280545	81284034	3	7.88055e-11	No	Yes	uc002bfx.2;MESDC2;chr15:81277205-81287205;uc010uno.1;MESDC2;chr15:81277205-81287205;uc002bfy.1;MESDC2;chr15:81277205-81287205;
chr15:81774952-82339426	564474	chr15	81774952	81778028	chr15	82336654	82339426	3	4.70966e-10	No	Yes	uc002bgq.1;MEX3B;chr15:82333361-82343361;
chr15:82102744-82340589	237845	chr15	82102744	82106758	chr15	82337516	82340589	4	7.78497e-13	No	Yes	uc002bgq.1;MEX3B;chr15:82333361-82343361;
chr15:83434522-83479889	45367	chr15	83434522	83436692	chr15	83477124	83479889	3	6.30739e-11	No	Yes	uc002bjd.2;FSD2;chr15:83469806-83479806;uc010uol.1;FSD2;chr15:83469806-83479806;uc010uom.1;FSD2;chr15:83469806-83479806;uc002bje.2;WHAMM;chr15:83472972-83482972;
chr15:83603085-83622766	19681	chr15	83603085	83606427	chr15	83619631	83622766	4	7.312e-14	No	Yes	uc002bjh.2;HOMER2;chr15:83616473-83626473;uc002bjg.2;HOMER2;chr15:83616473-83626473;uc002bjj.2;HOMER2;chr15:83616473-83626473;uc002bji.2;HOMER2;chr15:83616473-83626473;
chr15:83717837-83877023	159186	chr15	83717837	83720044	chr15	83874564	83877023	3	2.38572e-10	No	Yes	uc002bjs.1;HDGFRP3;chr15:83871321-83881321;
chr15:83813627-83878663	65036	chr15	83813627	83817945	chr15	83876310	83878663	3	2.22136e-10	No	Yes	uc002bjs.1;HDGFRP3;chr15:83871321-83881321;
chr15:85240299-85261740	21441	chr15	85240299	85242306	chr15	85258825	85261740	3	2.05828e-11	No	Yes	uc002blb.1;SEC11A;chr15:85254674-85264674;uc002blc.1;SEC11B;chr15:85254674-85264674;
chr15:85346825-85363179	16354	chr15	85346825	85349310	chr15	85359415	85363179	3	6.82177e-12	No	Yes	uc002ble.2;ALPK3;chr15:85354910-85364910;
chr15:85497308-85526594	29286	chr15	85497308	85500786	chr15	85524030	85526594	4	5.74935e-14	No	Yes	uc002blh.2;PDE8A;chr15:85520204-85530204;uc002bli.2;PDE8A;chr15:85520204-85530204;uc010bnc.2;PDE8A;chr15:85520204-85530204;uc010bnd.2;PDE8A;chr15:85520204-85530204;uc002blj.2;PDE8A;chr15:85520204-85530204;
chr15:86303673-86339557	35884	chr15	86303673	86306775	chr15	86336479	86339557	4	9.6154e-15	No	Yes	uc002bly.2;KLHL25;chr15:86333189-86343189;
chr15:86328287-86339410	11123	chr15	86328287	86330812	chr15	86335806	86339410	6	2.63057e-23	No	Yes	uc002bly.2;KLHL25;chr15:86333189-86343189;
chr15:90211436-90223594	12158	chr15	90211436	90214341	chr15	90219633	90223594	4	1.29659e-17	No	Yes	uc010upx.1;PLIN1;chr15:90217648-90227648;uc002boh.2;PLIN1;chr15:90217648-90227648;
chr15:90326720-90647027	320307	chr15	90326720	90329372	chr15	90644035	90647027	3	2.34401e-08	No	Yes	uc010uqb.1;IDH2;chr15:90638927-90648927;uc002box.2;IDH2;chr15:90640708-90650708;uc010uqc.1;IDH2;chr15:90640708-90650708;uc010bnu.2;IDH2;chr15:90640708-90650708;
chr15:90445141-90456313	11172	chr15	90445141	90448852	chr15	90453129	90456313	3	2.56984e-12	No	Yes	uc002bos.3;C15orf38;chr15:90451222-90461222;uc002bot.1;C15orf38;chr15:90450919-90460919;uc002bou.2;C15orf38;chr15:90451222-90461222;
chr15:90698600-90778632	80032	chr15	90698600	90705367	chr15	90773832	90778632	12	5.78257e-34	No	Yes	uc002bpb.3;CIB1;chr15:90772279-90782279;uc002bpc.2;C15orf58;chr15:90772486-90782486;
chr15:90699895-90764642	64747	chr15	90699895	90703594	chr15	90760949	90764642	5	2.16114e-17	No	Yes	uc002bpa.2;SEMA4B;chr15:90757439-90767439;uc010bnv.1;SEMA4B;chr15:90759845-90769845;
chr15:90700444-90750780	50336	chr15	90700444	90704117	chr15	90748951	90750780	3	1.27647e-10	No	Yes	uc002boz.2;SEMA4B;chr15:90739561-90749561;uc010uqd.1;SEMA4B;chr15:90739561-90749561;
chr15:90703743-90762488	58745	chr15	90703743	90706438	chr15	90758165	90762488	3	1.30474e-10	No	Yes	uc002bpa.2;SEMA4B;chr15:90757439-90767439;uc010bnv.1;SEMA4B;chr15:90759845-90769845;
chr15:90704827-90745714	40887	chr15	90704827	90708006	chr15	90742066	90745714	3	6.33355e-10	No	Yes	uc002boz.2;SEMA4B;chr15:90739561-90749561;uc010uqd.1;SEMA4B;chr15:90739561-90749561;
chr15:90707796-90810422	102626	chr15	90707796	90711840	chr15	90807157	90810422	4	1.11128e-11	No	Yes	uc002bpf.1;NGRN;chr15:90803894-90813894;uc002bpg.1;NGRN;chr15:90803894-90813894;
chr15:91021045-91075960	54915	chr15	91021045	91024942	chr15	91072458	91075960	3	1.3687e-09	No	Yes	uc002bpn.2;FLJ00364;chr15:91068197-91078197;uc002bpo.2;CRTC3;chr15:91068197-91078197;uc002bpp.2;CRTC3;chr15:91068197-91078197;
chr15:91235747-91261828	26081	chr15	91235747	91238239	chr15	91258768	91261828	3	5.91335e-12	No	Yes	uc002bpr.2;BLM;chr15:91255578-91265578;uc010uqh.1;BLM;chr15:91255578-91265578;uc010uqi.1;BLM;chr15:91255578-91265578;uc010bnx.2;BLM;chr15:91255578-91265578;
chr15:92248630-92398987	150357	chr15	92248630	92251233	chr15	92396335	92398987	3	3.72852e-13	No	Yes	uc002bqx.2;SLCO3A1;chr15:92391937-92401937;uc002bqy.2;SLCO3A1;chr15:92391937-92401937;uc010boc.1;SLCO3A1;chr15:92392564-92402564;uc002bqz.1;SLCO3A1;chr15:92392564-92402564;
chr15:95568098-96875469	1307371	chr15	95568098	95572465	chr15	96872192	96875469	4	3.33192e-12	No	Yes	uc010bol.1;AK307134;chr15:96865577-96875577;uc002bto.1;AK000872;chr15:96865577-96875577;uc002btp.2;NR2F2;chr15:96864156-96874156;uc010uri.1;NR2F2;chr15:96869110-96879110;uc010urj.1;NR2F2;chr15:96870793-96880793;uc010urk.1;NR2F2;chr15:96871568-96881568;
chr15:95787963-96884124	1096161	chr15	95787963	95790329	chr15	96881038	96884124	3	3.76674e-11	No	Yes	uc010urk.1;NR2F2;chr15:96871568-96881568;
chr15:96368132-96877807	509675	chr15	96368132	96375126	chr15	96872093	96877807	11	1.57526e-27	No	Yes	uc010bol.1;AK307134;chr15:96865577-96875577;uc002bto.1;AK000872;chr15:96865577-96875577;uc002btp.2;NR2F2;chr15:96864156-96874156;uc010uri.1;NR2F2;chr15:96869110-96879110;uc010urj.1;NR2F2;chr15:96870793-96880793;uc010urk.1;NR2F2;chr15:96871568-96881568;
chr15:96370855-96871864	501009	chr15	96370855	96374059	chr15	96869333	96871864	4	1.64273e-12	No	Yes	uc010bol.1;AK307134;chr15:96865577-96875577;uc002bto.1;AK000872;chr15:96865577-96875577;uc002btp.2;NR2F2;chr15:96864156-96874156;uc010uri.1;NR2F2;chr15:96869110-96879110;uc010urj.1;NR2F2;chr15:96870793-96880793;uc010urk.1;NR2F2;chr15:96871568-96881568;
chr15:96413428-96874593	461165	chr15	96413428	96419344	chr15	96870161	96874593	7	2.34617e-17	No	Yes	uc010bol.1;AK307134;chr15:96865577-96875577;uc002bto.1;AK000872;chr15:96865577-96875577;uc002btp.2;NR2F2;chr15:96864156-96874156;uc010uri.1;NR2F2;chr15:96869110-96879110;uc010urj.1;NR2F2;chr15:96870793-96880793;uc010urk.1;NR2F2;chr15:96871568-96881568;
chr15:96419638-96877976	458338	chr15	96419638	96422116	chr15	96876128	96877976	3	2.97708e-10	No	Yes	uc010uri.1;NR2F2;chr15:96869110-96879110;uc010urj.1;NR2F2;chr15:96870793-96880793;uc010urk.1;NR2F2;chr15:96871568-96881568;
chr15:96485555-96876058	390503	chr15	96485555	96490545	chr15	96871277	96876058	8	3.9335e-20	No	Yes	uc010bol.1;AK307134;chr15:96865577-96875577;uc002bto.1;AK000872;chr15:96865577-96875577;uc002btp.2;NR2F2;chr15:96864156-96874156;uc010uri.1;NR2F2;chr15:96869110-96879110;uc010urj.1;NR2F2;chr15:96870793-96880793;uc010urk.1;NR2F2;chr15:96871568-96881568;
chr15:96490084-96881115	391031	chr15	96490084	96494418	chr15	96877714	96881115	3	2.00199e-09	No	Yes	uc010uri.1;NR2F2;chr15:96869110-96879110;uc010urj.1;NR2F2;chr15:96870793-96880793;uc010urk.1;NR2F2;chr15:96871568-96881568;
chr15:96542196-96874475	332279	chr15	96542196	96544232	chr15	96871069	96874475	3	2.48276e-09	No	Yes	uc010bol.1;AK307134;chr15:96865577-96875577;uc002bto.1;AK000872;chr15:96865577-96875577;uc002btp.2;NR2F2;chr15:96864156-96874156;uc010uri.1;NR2F2;chr15:96869110-96879110;uc010urj.1;NR2F2;chr15:96870793-96880793;uc010urk.1;NR2F2;chr15:96871568-96881568;
chr15:96546045-96876685	330640	chr15	96546045	96549226	chr15	96873840	96876685	3	1.45184e-08	No	Yes	uc010bol.1;AK307134;chr15:96865577-96875577;uc002bto.1;AK000872;chr15:96865577-96875577;uc002btp.2;NR2F2;chr15:96864156-96874156;uc010uri.1;NR2F2;chr15:96869110-96879110;uc010urj.1;NR2F2;chr15:96870793-96880793;uc010urk.1;NR2F2;chr15:96871568-96881568;
chr15:96561408-96876428	315020	chr15	96561408	96564331	chr15	96872240	96876428	3	7.34621e-09	No	Yes	uc010bol.1;AK307134;chr15:96865577-96875577;uc002bto.1;AK000872;chr15:96865577-96875577;uc002btp.2;NR2F2;chr15:96864156-96874156;uc010uri.1;NR2F2;chr15:96869110-96879110;uc010urj.1;NR2F2;chr15:96870793-96880793;uc010urk.1;NR2F2;chr15:96871568-96881568;
chr15:96601253-96879862	278609	chr15	96601253	96605434	chr15	96877739	96879862	3	2.84828e-10	No	Yes	uc010uri.1;NR2F2;chr15:96869110-96879110;uc010urj.1;NR2F2;chr15:96870793-96880793;uc010urk.1;NR2F2;chr15:96871568-96881568;
chr15:96605805-96875243	269438	chr15	96605805	96608441	chr15	96871094	96875243	3	5.21599e-09	No	Yes	uc010bol.1;AK307134;chr15:96865577-96875577;uc002bto.1;AK000872;chr15:96865577-96875577;uc002btp.2;NR2F2;chr15:96864156-96874156;uc010uri.1;NR2F2;chr15:96869110-96879110;uc010urj.1;NR2F2;chr15:96870793-96880793;uc010urk.1;NR2F2;chr15:96871568-96881568;
chr15:96613116-96876226	263110	chr15	96613116	96620238	chr15	96871715	96876226	7	1.04879e-17	No	Yes	uc010bol.1;AK307134;chr15:96865577-96875577;uc002bto.1;AK000872;chr15:96865577-96875577;uc002btp.2;NR2F2;chr15:96864156-96874156;uc010uri.1;NR2F2;chr15:96869110-96879110;uc010urj.1;NR2F2;chr15:96870793-96880793;uc010urk.1;NR2F2;chr15:96871568-96881568;
chr15:96645609-96870923	225314	chr15	96645609	96648898	chr15	96867677	96870923	5	3.76347e-15	No	Yes	uc010bol.1;AK307134;chr15:96865577-96875577;uc002bto.1;AK000872;chr15:96865577-96875577;uc002btp.2;NR2F2;chr15:96864156-96874156;uc010uri.1;NR2F2;chr15:96869110-96879110;uc010urj.1;NR2F2;chr15:96870793-96880793;
chr15:96713187-96875438	162251	chr15	96713187	96716158	chr15	96872540	96875438	3	2.93876e-09	No	Yes	uc010bol.1;AK307134;chr15:96865577-96875577;uc002bto.1;AK000872;chr15:96865577-96875577;uc002btp.2;NR2F2;chr15:96864156-96874156;uc010uri.1;NR2F2;chr15:96869110-96879110;uc010urj.1;NR2F2;chr15:96870793-96880793;uc010urk.1;NR2F2;chr15:96871568-96881568;
chr15:96771096-96876269	105173	chr15	96771096	96773090	chr15	96872340	96876269	3	2.09505e-09	No	Yes	uc010bol.1;AK307134;chr15:96865577-96875577;uc002bto.1;AK000872;chr15:96865577-96875577;uc002btp.2;NR2F2;chr15:96864156-96874156;uc010uri.1;NR2F2;chr15:96869110-96879110;uc010urj.1;NR2F2;chr15:96870793-96880793;uc010urk.1;NR2F2;chr15:96871568-96881568;
chr15:96773496-96875110	101614	chr15	96773496	96775698	chr15	96871987	96875110	5	5.92955e-15	No	Yes	uc010bol.1;AK307134;chr15:96865577-96875577;uc002bto.1;AK000872;chr15:96865577-96875577;uc002btp.2;NR2F2;chr15:96864156-96874156;uc010uri.1;NR2F2;chr15:96869110-96879110;uc010urj.1;NR2F2;chr15:96870793-96880793;uc010urk.1;NR2F2;chr15:96871568-96881568;
chr15:96773856-96871954	98098	chr15	96773856	96776125	chr15	96868837	96871954	4	1.1974e-12	No	Yes	uc010bol.1;AK307134;chr15:96865577-96875577;uc002bto.1;AK000872;chr15:96865577-96875577;uc002btp.2;NR2F2;chr15:96864156-96874156;uc010uri.1;NR2F2;chr15:96869110-96879110;uc010urj.1;NR2F2;chr15:96870793-96880793;uc010urk.1;NR2F2;chr15:96871568-96881568;
chr15:96820845-96875332	54487	chr15	96820845	96823831	chr15	96872157	96875332	3	1.53464e-09	No	Yes	uc010bol.1;AK307134;chr15:96865577-96875577;uc002bto.1;AK000872;chr15:96865577-96875577;uc002btp.2;NR2F2;chr15:96864156-96874156;uc010uri.1;NR2F2;chr15:96869110-96879110;uc010urj.1;NR2F2;chr15:96870793-96880793;uc010urk.1;NR2F2;chr15:96871568-96881568;
chr15:96823729-96870668	46939	chr15	96823729	96826352	chr15	96868451	96870668	3	8.97015e-11	No	Yes	uc010bol.1;AK307134;chr15:96865577-96875577;uc002bto.1;AK000872;chr15:96865577-96875577;uc002btp.2;NR2F2;chr15:96864156-96874156;uc010uri.1;NR2F2;chr15:96869110-96879110;
chr15:98446343-98506363	60020	chr15	98446343	98449831	chr15	98503769	98506363	4	6.89576e-16	No	Yes	uc010bom.2;ARRDC4;chr15:98498932-98508932;
chr15:98984481-99192565	208084	chr15	98984481	98987744	chr15	99189279	99192565	6	2.01618e-17	No	Yes	uc010urq.1;IGF1R;chr15:99187760-99197760;uc002bul.2;IGF1R;chr15:99187760-99197760;uc010bon.2;IGF1R;chr15:99187760-99197760;
chr15:98987850-99190624	202774	chr15	98987850	98990421	chr15	99187354	99190624	3	6.71688e-11	No	Yes	uc010urq.1;IGF1R;chr15:99187760-99197760;uc002bul.2;IGF1R;chr15:99187760-99197760;uc010bon.2;IGF1R;chr15:99187760-99197760;
chr15:99091354-99192360	101006	chr15	99091354	99093852	chr15	99189514	99192360	4	2.12612e-13	No	Yes	uc010urq.1;IGF1R;chr15:99187760-99197760;uc002bul.2;IGF1R;chr15:99187760-99197760;uc010bon.2;IGF1R;chr15:99187760-99197760;
chr15:99152433-99192921	40488	chr15	99152433	99154769	chr15	99191369	99192921	3	2.75352e-10	No	Yes	uc010urq.1;IGF1R;chr15:99187760-99197760;uc002bul.2;IGF1R;chr15:99187760-99197760;uc010bon.2;IGF1R;chr15:99187760-99197760;
chr15:99176009-99190281	14272	chr15	99176009	99179662	chr15	99186931	99190281	3	8.65989e-11	No	Yes	uc010urq.1;IGF1R;chr15:99187760-99197760;uc002bul.2;IGF1R;chr15:99187760-99197760;uc010bon.2;IGF1R;chr15:99187760-99197760;
chr15:99287662-99451128	163466	chr15	99287662	99298250	chr15	99433924	99451128	24	0	No	Yes	uc010urr.1;IGF1R;chr15:99449543-99459543;
chr15:99960171-100108193	148022	chr15	99960171	99963200	chr15	100104719	100108193	3	3.42621e-11	No	Yes	uc010urv.1;MEF2A;chr15:100101132-100111132;uc010bos.2;MEF2A;chr15:100101132-100111132;uc002bvf.2;MEF2A;chr15:100101132-100111132;uc002bve.2;MEF2A;chr15:100101132-100111132;uc002bvg.2;MEF2A;chr15:100101132-100111132;
chr15:99964977-100106400	141423	chr15	99964977	99967345	chr15	100103742	100106400	3	1.35445e-10	No	Yes	uc010urv.1;MEF2A;chr15:100101132-100111132;uc010bos.2;MEF2A;chr15:100101132-100111132;uc002bvf.2;MEF2A;chr15:100101132-100111132;uc002bve.2;MEF2A;chr15:100101132-100111132;uc002bvg.2;MEF2A;chr15:100101132-100111132;
chr15:100078847-100107493	28646	chr15	100078847	100082509	chr15	100104862	100107493	4	3.06364e-14	No	Yes	uc010urv.1;MEF2A;chr15:100101132-100111132;uc010bos.2;MEF2A;chr15:100101132-100111132;uc002bvf.2;MEF2A;chr15:100101132-100111132;uc002bve.2;MEF2A;chr15:100101132-100111132;uc002bvg.2;MEF2A;chr15:100101132-100111132;
chr15:100468950-100523609	54659	chr15	100468950	100471071	chr15	100521091	100523609	3	2.08695e-13	No	Yes	uc002bvw.1;ADAMTS17;chr15:100511476-100521476;
chr15:101203515-101421345	217830	chr15	101203515	101206568	chr15	101418512	101421345	3	6.1262e-11	No	Yes	uc010bpa.1;ALDH1A3;chr15:101415008-101425008;uc002bwn.3;ALDH1A3;chr15:101415008-101425008;uc010bpb.2;ALDH1A3;chr15:101415008-101425008;
chr15:101260446-101421006	160560	chr15	101260446	101265428	chr15	101417656	101421006	5	6.51733e-15	No	Yes	uc010bpa.1;ALDH1A3;chr15:101415008-101425008;uc002bwn.3;ALDH1A3;chr15:101415008-101425008;uc010bpb.2;ALDH1A3;chr15:101415008-101425008;
chr15:101389302-101415109	25807	chr15	101389302	101391436	chr15	101411938	101415109	4	2.9848e-14	No	Yes	uc010bpa.1;ALDH1A3;chr15:101415008-101425008;uc002bwn.3;ALDH1A3;chr15:101415008-101425008;uc010bpb.2;ALDH1A3;chr15:101415008-101425008;
chr15:101392386-101421463	29077	chr15	101392386	101394742	chr15	101418041	101421463	3	7.87343e-10	No	Yes	uc010bpa.1;ALDH1A3;chr15:101415008-101425008;uc002bwn.3;ALDH1A3;chr15:101415008-101425008;uc010bpb.2;ALDH1A3;chr15:101415008-101425008;
chr15:101736543-101794885	58342	chr15	101736543	101740859	chr15	101792449	101794885	3	6.20426e-12	No	Yes	uc002bwt.1;CHSY1;chr15:101787126-101797126;
chr15:101966781-102030033	63252	chr15	101966781	101968974	chr15	102028062	102030033	3	5.58188e-12	No	Yes	uc002bwy.2;PCSK6;chr15:102025187-102035187;uc010bpe.2;PCSK6;chr15:102025187-102035187;uc002bxa.2;PCSK6;chr15:102025187-102035187;uc002bxb.2;PCSK6;chr15:102025187-102035187;uc002bxc.1;PCSK6;chr15:102025187-102035187;uc002bxd.1;PCSK6;chr15:102025187-102035187;uc002bxe.2;PCSK6;chr15:102025187-102035187;uc002bxg.1;PCSK6;chr15:102025187-102035187;
chr15:102202734-102265712	62978	chr15	102202734	102205240	chr15	102263187	102265712	4	2.41028e-14	No	Yes	uc002bxm.2;TARSL2;chr15:102259645-102269645;uc010usi.1;TARSL2;chr15:102259645-102269645;
chr15:102207707-102265896	58189	chr15	102207707	102211381	chr15	102261818	102265896	4	3.70993e-14	No	Yes	uc002bxm.2;TARSL2;chr15:102259645-102269645;uc010usi.1;TARSL2;chr15:102259645-102269645;
chr15:102223663-102265380	41717	chr15	102223663	102225870	chr15	102263031	102265380	3	2.80953e-10	No	Yes	uc002bxm.2;TARSL2;chr15:102259645-102269645;uc010usi.1;TARSL2;chr15:102259645-102269645;
chr16:247766-280045	32279	chr16	247766	250827	chr16	277559	280045	3	3.98413e-11	No	Yes	uc010bqq.1;LUC7L;chr16:274164-284164;uc002cga.1;LUC7L;chr16:274449-284449;uc002cgc.1;LUC7L;chr16:274449-284449;uc002cgd.1;SR+89;chr16:274449-284449;uc002cge.1;LUC7L;chr16:274449-284449;uc010bqr.2;DKFZp761D0211;chr16:279800-289800;uc002cgf.2;ITFG3;chr16:279800-289800;uc002cgg.2;ITFG3;chr16:279800-289800;uc010uud.1;ITFG3;chr16:279800-289800;
chr16:359833-404772	44939	chr16	359833	361366	chr16	401550	404772	3	1.12819e-11	No	Yes	uc002cgp.1;AXIN1;chr16:397464-407464;uc002cgq.1;AXIN1;chr16:397464-407464;
chr16:1115717-1148980	33263	chr16	1115717	1118747	chr16	1145973	1148980	3	3.71428e-12	No	Yes	uc010uuw.1;C1QTNF8;chr16:1141244-1151244;
chr16:1156312-1207000	50688	chr16	1156312	1162455	chr16	1201352	1207000	7	2.54904e-21	No	Yes	uc002cks.2;CACNA1H;chr16:1198240-1208240;uc002ckt.2;CACNA1H;chr16:1198240-1208240;
chr16:1696093-1755972	59879	chr16	1696093	1698847	chr16	1753328	1755972	3	9.19305e-11	No	Yes	uc002cmi.1;MAPK8IP3;chr16:1751220-1761220;uc002cmj.1;KIAA1066;chr16:1751220-1761220;uc002cmk.2;MAPK8IP3;chr16:1751220-1761220;uc002cml.2;MAPK8IP3;chr16:1751220-1761220;uc010uvl.1;MAPK8IP3;chr16:1751220-1761220;
chr16:2815524-2888784	73260	chr16	2815524	2818215	chr16	2884460	2888784	3	1.5727e-10	No	Yes	uc002cru.2;ZG16B;chr16:2875172-2885172;uc002crw.2;MGC52282;chr16:2887473-2897473;uc002crx.2;MGC52282;chr16:2887711-2897711;
chr16:2818494-2909513	91019	chr16	2818494	2820710	chr16	2906482	2909513	3	2.16941e-08	No	Yes	uc002cry.1;PRSS22;chr16:2903171-2913171;uc002crz.1;PRSS22;chr16:2903171-2913171;
chr16:2917906-2964629	46723	chr16	2917906	2920105	chr16	2961768	2964629	3	1.08049e-09	No	Yes	uc002csb.2;FLYWCH1;chr16:2956979-2966979;uc002csc.2;FLYWCH1;chr16:2956979-2966979;uc002csd.2;FLYWCH1;chr16:2956979-2966979;
chr16:2953268-3037784	84516	chr16	2953268	2955436	chr16	3034668	3037784	3	1.89638e-08	No	Yes	uc002csm.2;PKMYT1;chr16:3025474-3035474;uc002csn.2;PKMYT1;chr16:3025474-3035474;uc002cso.2;PKMYT1;chr16:3025474-3035474;uc002csp.2;PKMYT1;chr16:3025474-3035474;uc002csq.2;PKMYT1;chr16:3025474-3035474;uc002csr.1;AK098017;chr16:3034054-3044054;uc002css.1;AK128266;chr16:3035194-3045194;
chr16:3241971-3334816	92845	chr16	3241971	3245107	chr16	3330760	3334816	3	3.83589e-10	No	Yes	uc002cup.2;ZNF263;chr16:3328486-3338486;uc002cuq.2;ZNF263;chr16:3328486-3338486;uc002cur.2;ZNF263;chr16:3334392-3344392;
chr16:3478937-3494602	15665	chr16	3478937	3484557	chr16	3491241	3494602	5	4.55544e-17	No	Yes	uc002cvd.2;ZNF597;chr16:3488490-3498490;uc010uxb.1;NAT15;chr16:3488681-3498681;uc002cvh.3;NAT15;chr16:3488667-3498667;
chr16:3572637-3580804	8167	chr16	3572637	3575119	chr16	3578551	3580804	3	4.91306e-15	No	Yes	uc002cvn.1;BC141902;chr16:3579255-3589255;
chr16:3794428-3931729	137301	chr16	3794428	3796643	chr16	3929216	3931729	3	9.39749e-11	No	Yes	uc002cvv.2;CREBBP;chr16:3925121-3935121;uc002cvw.2;CREBBP;chr16:3925121-3935121;
chr16:3846752-3931607	84855	chr16	3846752	3849377	chr16	3928951	3931607	3	1.52932e-10	No	Yes	uc002cvv.2;CREBBP;chr16:3925121-3935121;uc002cvw.2;CREBBP;chr16:3925121-3935121;
chr16:4184710-4323230	138520	chr16	4184710	4187939	chr16	4321166	4323230	3	1.19537e-08	No	Yes	uc010uxg.1;TFAP4;chr16:4318001-4328001;
chr16:4248943-4303665	54722	chr16	4248943	4251834	chr16	4300761	4303665	3	7.22877e-11	No	Yes	uc002cwa.1;AK094828;chr16:4298790-4308790;
chr16:4262588-4292100	29512	chr16	4262588	4265631	chr16	4289962	4292100	3	2.1128e-12	No	Yes	uc002cvz.3;SRL;chr16:4287081-4297081;uc002cvy.3;DKFZp451C023;chr16:4287081-4297081;
chr16:4311797-4398650	86853	chr16	4311797	4315235	chr16	4395773	4398650	3	2.13963e-10	No	Yes	uc002cwd.2;Magmas;chr16:4396300-4406300;
chr16:4338241-4398568	60327	chr16	4338241	4343957	chr16	4393066	4398568	6	3.56501e-20	No	Yes	uc002cwd.2;Magmas;chr16:4396300-4406300;
chr16:4339244-4381283	42039	chr16	4339244	4342430	chr16	4377308	4381283	4	5.59994e-16	No	Yes	uc002cwc.1;GLIS2;chr16:4377215-4387215;
chr16:4357204-4422703	65499	chr16	4357204	4359537	chr16	4420769	4422703	3	2.10739e-08	No	Yes	uc002cwj.1;VASN;chr16:4416848-4426848;
chr16:4622317-4666643	44326	chr16	4622317	4626395	chr16	4663074	4666643	4	1.06306e-13	No	Yes	uc002cwy.2;AK055785;chr16:4659869-4669869;uc002cwx.2;FAM100A;chr16:4659927-4669927;uc010btv.1;FAM100A;chr16:4659927-4669927;
chr16:4712917-4744491	31574	chr16	4712917	4716078	chr16	4741313	4744491	3	5.64148e-10	No	Yes	uc002cxe.2;NUDT16L1;chr16:4738715-4748715;uc002cxf.1;NUDT16L1;chr16:4738715-4748715;
chr16:4767945-4784391	16446	chr16	4767945	4770029	chr16	4782722	4784391	3	4.68079e-13	No	Yes	uc002cxi.1;ANKS3;chr16:4773079-4783079;uc002cxj.1;ANKS3;chr16:4779163-4789163;uc002cxk.2;ANKS3;chr16:4779250-4789250;uc002cxl.2;ANKS3;chr16:4779250-4789250;uc010uxs.1;ANKS3;chr16:4779250-4789250;uc002cxm.2;KIAA1977;chr16:4779250-4789250;uc002cxn.2;C16orf71;chr16:4779288-4789288;
chr16:4793404-4819285	25881	chr16	4793404	4796729	chr16	4816818	4819285	3	1.34667e-10	No	Yes	uc002cxo.1;ZNF500;chr16:4811077-4821077;uc002cxp.1;ZNF500;chr16:4812166-4822166;uc010uxt.1;ZNF500;chr16:4812166-4822166;
chr16:4911279-4988032	76753	chr16	4911279	4915234	chr16	4986052	4988032	4	6.66725e-14	No	Yes	uc002cyd.1;PPL;chr16:4982136-4992136;
chr16:4931388-4988394	57006	chr16	4931388	4934844	chr16	4985628	4988394	3	2.04888e-10	No	Yes	uc002cyd.1;PPL;chr16:4982136-4992136;
chr16:4967371-4988728	21357	chr16	4967371	4970929	chr16	4982878	4988728	6	7.54335e-21	No	Yes	uc002cyd.1;PPL;chr16:4982136-4992136;
chr16:4971464-4988952	17488	chr16	4971464	4978019	chr16	4984574	4988952	9	7.9893e-30	No	Yes	uc002cyd.1;PPL;chr16:4982136-4992136;
chr16:4973231-4996641	23410	chr16	4973231	4977560	chr16	4992043	4996641	5	1.92091e-17	No	Yes	uc002cyd.1;PPL;chr16:4982136-4992136;
chr16:4995005-5007776	12771	chr16	4995005	4997212	chr16	5004863	5007776	3	1.85709e-11	No	Yes	uc002cye.2;SEC14L5;chr16:5003317-5013317;
chr16:9008206-9187438	179232	chr16	9008206	9011185	chr16	9183696	9187438	3	1.07165e-09	No	Yes	uc002czm.2;C16orf72;chr16:9180536-9190536;
chr16:9105741-9187007	81266	chr16	9105741	9108749	chr16	9185278	9187007	3	5.07921e-11	No	Yes	uc002czm.2;C16orf72;chr16:9180536-9190536;
chr16:10653977-10675353	21376	chr16	10653977	10657478	chr16	10671680	10675353	3	2.79199e-10	No	Yes	uc002czx.2;EMP2;chr16:10669539-10679539;
chr16:11122590-11350579	227989	chr16	11122590	11125241	chr16	11348588	11350579	3	1.09692e-10	No	Yes	uc002dar.1;SOCS1;chr16:11345039-11355039;
chr16:11206525-11352144	145619	chr16	11206525	11209212	chr16	11348473	11352144	3	2.64962e-10	No	Yes	uc002dar.1;SOCS1;chr16:11345039-11355039;uc002daq.1;C16orf75;chr16:11338505-11348505;
chr16:11664320-11682229	17909	chr16	11664320	11666775	chr16	11679493	11682229	3	2.09804e-11	No	Yes	uc002daz.2;LITAF;chr16:11675229-11685229;uc002dba.2;LITAF;chr16:11675806-11685806;uc002dbb.2;LITAF;chr16:11675806-11685806;uc002dbe.3;LITAF;chr16:11675806-11685806;uc002dbc.2;LITAF;chr16:11676103-11686103;uc002dbd.2;LITAF;chr16:11676322-11686322;
chr16:11667451-11684653	17202	chr16	11667451	11673993	chr16	11677145	11684653	10	2.82532e-34	No	Yes	uc002daz.2;LITAF;chr16:11675229-11685229;uc002dba.2;LITAF;chr16:11675806-11685806;uc002dbb.2;LITAF;chr16:11675806-11685806;uc002dbe.3;LITAF;chr16:11675806-11685806;uc002dbc.2;LITAF;chr16:11676103-11686103;uc002dbd.2;LITAF;chr16:11676322-11686322;
chr16:12878199-12899012	20813	chr16	12878199	12880560	chr16	12895056	12899012	3	3.14893e-12	No	Yes	uc002dca.3;CPPED1;chr16:12892744-12902744;uc002dcb.3;CPPED1;chr16:12892744-12902744;
chr16:14394289-14469192	74903	chr16	14394289	14398099	chr16	14464956	14469192	6	8.33562e-18	No	Yes	uc002dck.1;CR593775;chr16:14459123-14469123;
chr16:14394526-14460466	65940	chr16	14394526	14400519	chr16	14456747	14460466	9	4.70725e-27	No	Yes	uc002dck.1;CR593775;chr16:14459123-14469123;
chr16:14394856-14464759	69903	chr16	14394856	14398156	chr16	14462008	14464759	6	2.62776e-17	No	Yes	uc002dck.1;CR593775;chr16:14459123-14469123;
chr16:14399436-14466504	67068	chr16	14399436	14403337	chr16	14462509	14466504	4	4.5567e-12	No	Yes	uc002dck.1;CR593775;chr16:14459123-14469123;
chr16:15136318-15148839	12521	chr16	15136318	15139779	chr16	15145358	15148839	5	3.41759e-22	No	Yes	uc002ddd.2;NTAN1;chr16:15144833-15154833;uc010uzo.1;NTAN1;chr16:15144833-15154833;
chr16:15582998-15738332	155334	chr16	15582998	15585380	chr16	15735703	15738332	3	2.66897e-09	No	Yes	uc002ddq.2;KIAA0430;chr16:15728148-15738148;uc002ddr.2;KIAA0430;chr16:15732009-15742009;uc010uzv.1;KIAA0430;chr16:15732009-15742009;uc010uzw.1;KIAA0430;chr16:15732009-15742009;uc010uzx.1;LKAP;chr16:15732009-15742009;uc010uzy.1;NDE1;chr16:15732123-15742123;
chr16:15969104-16043663	74559	chr16	15969104	15976826	chr16	16040450	16043663	6	1.09174e-20	No	Yes	uc010bvi.2;ABCC1;chr16:16038433-16048433;uc010bvj.2;ABCC1;chr16:16038433-16048433;uc010bvk.2;ABCC1;chr16:16038433-16048433;uc010bvl.2;ABCC1;chr16:16038433-16048433;uc010bvm.2;ABCC1;chr16:16038433-16048433;
chr16:19095469-19179161	83692	chr16	19095469	19099538	chr16	19176744	19179161	3	2.09196e-12	No	Yes	uc002dfv.1;SYT17;chr16:19174637-19184637;uc002dfw.2;SYT17;chr16:19174637-19184637;uc002dfx.2;SYT17;chr16:19177620-19187620;uc002dfy.2;SYT17;chr16:19178678-19188678;
chr16:19096495-19125641	29146	chr16	19096495	19099316	chr16	19122462	19125641	3	9.64563e-11	No	Yes	uc002dft.2;ITPRIPL2;chr16:19120253-19130253;uc002dfu.3;ITPRIPL2;chr16:19120253-19130253;
chr16:19510853-19534414	23561	chr16	19510853	19515054	chr16	19532028	19534414	3	4.69937e-11	No	Yes	uc002dgh.2;GDE1;chr16:19528450-19538450;uc002dgi.2;MIR16;chr16:19528450-19538450;uc002dgj.2;KIAA0419;chr16:19530178-19540178;uc002dgk.3;CP110;chr16:19530178-19540178;uc002dgl.3;CEP110;chr16:19530178-19540178;
chr16:19708514-19730536	22022	chr16	19708514	19711754	chr16	19726572	19730536	3	1.09412e-10	No	Yes	uc002dgq.2;C16orf88;chr16:19724492-19734492;uc002dgr.2;IQCK;chr16:19722777-19732777;uc002dgs.2;IQCK;chr16:19722777-19732777;uc010vat.1;IQCK;chr16:19724016-19734016;uc010bwc.2;IQCK;chr16:19724016-19734016;uc010vau.1;IQCK;chr16:19724016-19734016;
chr16:20863797-20912531	48734	chr16	20863797	20866983	chr16	20910701	20912531	3	7.61623e-11	No	Yes	uc002dht.3;ERI2;chr16:20906561-20916561;uc002dhz.2;DCUN1D3;chr16:20906561-20916561;uc010bwi.1;LYRM1;chr16:20906556-20916556;uc010bwj.2;LYRM1;chr16:20906556-20916556;uc010bwk.2;LYRM1;chr16:20906556-20916556;uc002dia.3;LYRM1;chr16:20907074-20917074;uc010bwl.2;LYRM1;chr16:20907074-20917074;uc010bwm.2;LYRM1;chr16:20907074-20917074;uc002dib.2;LYRM1;chr16:20907425-20917425;
chr16:20888151-20914582	26431	chr16	20888151	20890674	chr16	20910265	20914582	3	6.37774e-10	No	Yes	uc002dht.3;ERI2;chr16:20906561-20916561;uc002dhz.2;DCUN1D3;chr16:20906561-20916561;uc010bwi.1;LYRM1;chr16:20906556-20916556;uc010bwj.2;LYRM1;chr16:20906556-20916556;uc010bwk.2;LYRM1;chr16:20906556-20916556;uc002dia.3;LYRM1;chr16:20907074-20917074;uc010bwl.2;LYRM1;chr16:20907074-20917074;uc010bwm.2;LYRM1;chr16:20907074-20917074;uc002dib.2;LYRM1;chr16:20907425-20917425;
chr16:21201769-21315246	113477	chr16	21201769	21204687	chr16	21312798	21315246	3	2.97556e-12	No	Yes	uc002dil.2;CRYM;chr16:21309417-21319417;uc002dim.2;CRYM;chr16:21309417-21319417;uc010bwr.1;NCRNA00169;chr16:21307169-21317169;
chr16:21294811-21312494	17683	chr16	21294811	21297913	chr16	21309788	21312494	3	1.66659e-12	No	Yes	uc002dil.2;CRYM;chr16:21309417-21319417;uc002dim.2;CRYM;chr16:21309417-21319417;uc010bwr.1;NCRNA00169;chr16:21307169-21317169;
chr16:22242815-22309306	66491	chr16	22242815	22245698	chr16	22306213	22309306	3	1.88492e-10	No	Yes	uc002dkj.1;POLR3E;chr16:22303740-22313740;uc002dkk.2;POLR3E;chr16:22303740-22313740;uc002dkm.2;POLR3E;chr16:22303740-22313740;uc010vbr.1;POLR3E;chr16:22303740-22313740;uc002dkl.2;POLR3E;chr16:22303740-22313740;uc010vbs.1;POLR3E;chr16:22303740-22313740;uc010vbt.1;KIAA1452;chr16:22309251-22319251;
chr16:22276808-22309674	32866	chr16	22276808	22279367	chr16	22307522	22309674	3	1.37656e-11	No	Yes	uc002dkj.1;POLR3E;chr16:22303740-22313740;uc002dkk.2;POLR3E;chr16:22303740-22313740;uc002dkm.2;POLR3E;chr16:22303740-22313740;uc010vbr.1;POLR3E;chr16:22303740-22313740;uc002dkl.2;POLR3E;chr16:22303740-22313740;uc010vbs.1;POLR3E;chr16:22303740-22313740;uc010vbt.1;KIAA1452;chr16:22309251-22319251;
chr16:22355971-22387056	31085	chr16	22355971	22358948	chr16	22383857	22387056	3	2.89015e-11	No	Yes	uc002dkn.2;CDR2;chr16:22380938-22390938;
chr16:23128141-23163109	34968	chr16	23128141	23130809	chr16	23159094	23163109	3	9.15526e-12	No	Yes	uc002dll.2;USP31;chr16:23155591-23165591;
chr16:24995029-25027703	32674	chr16	24995029	24997877	chr16	25025184	25027703	3	4.43186e-12	No	Yes	uc002dnb.2;ARHGAP17;chr16:25021675-25031675;uc002dnc.2;ARHGAP17;chr16:25021675-25031675;uc010vcf.1;MST066;chr16:25021675-25031675;uc002dng.1;ARHGAP17;chr16:25021675-25031675;
chr16:27240025-27327372	87347	chr16	27240025	27242485	chr16	27324109	27327372	5	4.7867e-16	No	Yes	uc002dom.2;IL4R;chr16:27320250-27330250;uc002don.2;IL4R;chr16:27320250-27330250;uc002dop.3;IL4R;chr16:27320250-27330250;uc010bxy.2;IL4R;chr16:27320250-27330250;uc002doo.2;IL4R;chr16:27320250-27330250;
chr16:27243056-27282623	39567	chr16	27243056	27250315	chr16	27275383	27282623	11	3.18075e-34	No	Yes	uc002doi.1;NSMCE1;chr16:27275113-27285113;uc002doj.1;NSMCE1;chr16:27275113-27285113;uc002dol.1;AK025061;chr16:27275189-27285189;uc002dok.2;BC044845;chr16:27274525-27284525;
chr16:27243749-27327074	83325	chr16	27243749	27250531	chr16	27322706	27327074	12	1.92373e-37	No	Yes	uc002dom.2;IL4R;chr16:27320250-27330250;uc002don.2;IL4R;chr16:27320250-27330250;uc002dop.3;IL4R;chr16:27320250-27330250;uc010bxy.2;IL4R;chr16:27320250-27330250;uc002doo.2;IL4R;chr16:27320250-27330250;
chr16:27251761-27326693	74932	chr16	27251761	27256935	chr16	27324220	27326693	5	1.01092e-15	No	Yes	uc002dom.2;IL4R;chr16:27320250-27330250;uc002don.2;IL4R;chr16:27320250-27330250;uc002dop.3;IL4R;chr16:27320250-27330250;uc010bxy.2;IL4R;chr16:27320250-27330250;uc002doo.2;IL4R;chr16:27320250-27330250;
chr16:27253255-27280397	27142	chr16	27253255	27256645	chr16	27278475	27280397	3	2.40453e-10	No	Yes	uc002doi.1;NSMCE1;chr16:27275113-27285113;uc002doj.1;NSMCE1;chr16:27275113-27285113;uc002dol.1;AK025061;chr16:27275189-27285189;uc002dok.2;BC044845;chr16:27274525-27284525;
chr16:27296444-27327837	31393	chr16	27296444	27298263	chr16	27324416	27327837	3	6.2332e-11	No	Yes	uc002dom.2;IL4R;chr16:27320250-27330250;uc002don.2;IL4R;chr16:27320250-27330250;uc002dop.3;IL4R;chr16:27320250-27330250;uc010bxy.2;IL4R;chr16:27320250-27330250;uc002doo.2;IL4R;chr16:27320250-27330250;
[truncated: 8,190 more rows]

## Sheet: K562 specific EP
interaction region	span	left anchor			right anchor			pet count	p-value	left anchor near promoter?	right anchor near promoter?	gene information
[truncated: 33,683 more rows]
